# Supplementary material
Source: publisher site journal article supplement (http://www.spandidos-publications.com/3952/downloadSupplementary)
Supplement: Supplementary file 1 [file downloadSupplementary]

## Sheet: Sheet1
Table SV. GO annotation results.
Term	Category	GO	UnigeneCount	Unigene
cytoplasm	cellular_component	GO:0005737	11277	TRINITY_DN85_c1_g1;TRINITY_DN85_c2_g1;TRINITY_DN52_c0_g1;TRINITY_DN39_c1_g2;TRINITY_DN24_c0_g1;TRINITY_DN60_c0_g1;TRINITY_DN93_c0_g1;TRINITY_DN93_c1_g1;TRINITY_DN17_c0_g1;TRINITY_DN46_c0_g3;TRINITY_DN46_c3_g1;TRINITY_DN92_c2_g1;TRINITY_DN55_c2_g2;TRINITY_DN55_c8_g1;TRINITY_DN70_c2_g1;TRINITY_DN89_c0_g2;TRINITY_DN21_c0_g1;TRINITY_DN21_c0_g3;TRINITY_DN21_c3_g1;TRINITY_DN21_c2_g1;TRINITY_DN72_c2_g2;…
nucleus	cellular_component	GO:0005634	9017	TRINITY_DN85_c5_g1;TRINITY_DN85_c1_g1;TRINITY_DN85_c2_g1;TRINITY_DN52_c0_g1;TRINITY_DN52_c0_g2;TRINITY_DN39_c1_g2;TRINITY_DN9_c4_g1;TRINITY_DN93_c0_g2;TRINITY_DN93_c1_g1;TRINITY_DN79_c0_g1;TRINITY_DN17_c0_g1;TRINITY_DN46_c0_g1;TRINITY_DN46_c0_g2;TRINITY_DN46_c3_g1;TRINITY_DN92_c0_g1;TRINITY_DN73_c0_g1;TRINITY_DN73_c0_g2;TRINITY_DN55_c0_g1;TRINITY_DN55_c3_g2;TRINITY_DN55_c2_g2;TRINITY_DN70_c0_g1;T…
metal ion binding	molecular_function	GO:0046872	8935	TRINITY_DN39_c1_g1;TRINITY_DN9_c11_g1;TRINITY_DN9_c4_g1;TRINITY_DN73_c1_g1;TRINITY_DN73_c0_g1;TRINITY_DN73_c0_g2;TRINITY_DN55_c3_g2;TRINITY_DN55_c9_g1;TRINITY_DN55_c6_g1;TRINITY_DN89_c0_g1;TRINITY_DN97_c4_g1;TRINITY_DN74_c4_g2;TRINITY_DN20_c0_g1;TRINITY_DN20_c0_g2;TRINITY_DN20_c0_g3;TRINITY_DN50_c3_g1;TRINITY_DN3_c9_g2;TRINITY_DN38_c1_g1;TRINITY_DN53_c1_g1;TRINITY_DN42_c2_g1;TRINITY_DN98_c1_g4;TR…
plasma membrane	cellular_component	GO:0005886	6937	TRINITY_DN77_c0_g1;TRINITY_DN39_c1_g2;TRINITY_DN4_c0_g1;TRINITY_DN12_c0_g1;TRINITY_DN68_c1_g1;TRINITY_DN60_c3_g1;TRINITY_DN93_c0_g1;TRINITY_DN55_c8_g1;TRINITY_DN70_c0_g2;TRINITY_DN70_c1_g1;TRINITY_DN89_c2_g1;TRINITY_DN21_c0_g1;TRINITY_DN72_c2_g2;TRINITY_DN72_c2_g1;TRINITY_DN54_c0_g1;TRINITY_DN97_c0_g1;TRINITY_DN83_c1_g1;TRINITY_DN5_c0_g1;TRINITY_DN10_c1_g1;TRINITY_DN78_c12_g1;TRINITY_DN86_c8_g1;T…
integral component of membrane	cellular_component	GO:0016021	6893	TRINITY_DN85_c4_g1;TRINITY_DN77_c0_g1;TRINITY_DN4_c0_g1;TRINITY_DN9_c1_g1;TRINITY_DN68_c1_g1;TRINITY_DN68_c0_g1;TRINITY_DN60_c3_g1;TRINITY_DN80_c0_g1;TRINITY_DN55_c3_g1;TRINITY_DN89_c2_g1;TRINITY_DN21_c0_g2;TRINITY_DN54_c0_g1;TRINITY_DN27_c0_g1;TRINITY_DN97_c0_g1;TRINITY_DN83_c1_g1;TRINITY_DN83_c0_g1;TRINITY_DN50_c2_g1;TRINITY_DN5_c0_g1;TRINITY_DN10_c1_g1;TRINITY_DN6_c0_g1;TRINITY_DN38_c1_g1;TRIN…
RNA-directed DNA polymerase activity	molecular_function	GO:0003964	5556	TRINITY_DN9_c11_g1;TRINITY_DN55_c9_g1;TRINITY_DN55_c6_g1;TRINITY_DN1_c4_g1;TRINITY_DN1_c4_g2;TRINITY_DN1_c2_g1;TRINITY_DN1_c8_g1;TRINITY_DN1_c15_g2;TRINITY_DN1_c111_g1;TRINITY_DN1_c6_g1;TRINITY_DN1_c79_g1;TRINITY_DN1_c161_g1;TRINITY_DN1_c5_g1;TRINITY_DN1_c10_g1;TRINITY_DN1_c142_g1;TRINITY_DN1_c54_g1;TRINITY_DN150_c0_g1;TRINITY_DN205_c4_g1;TRINITY_DN205_c7_g1;TRINITY_DN239_c13_g1;TRINITY_DN239_c0_…
DNA recombination	biological_process	GO:0006310	5526	TRINITY_DN9_c11_g1;TRINITY_DN55_c9_g1;TRINITY_DN55_c6_g1;TRINITY_DN38_c1_g1;TRINITY_DN1_c4_g1;TRINITY_DN1_c4_g2;TRINITY_DN1_c2_g1;TRINITY_DN1_c8_g1;TRINITY_DN1_c111_g1;TRINITY_DN1_c6_g1;TRINITY_DN1_c79_g1;TRINITY_DN1_c161_g1;TRINITY_DN1_c5_g1;TRINITY_DN1_c10_g1;TRINITY_DN1_c142_g1;TRINITY_DN1_c54_g1;TRINITY_DN150_c0_g1;TRINITY_DN143_c0_g1;TRINITY_DN125_c1_g1;TRINITY_DN136_c0_g1;TRINITY_DN205_c4_g…
cytosol	cellular_component	GO:0005829	5107	TRINITY_DN85_c0_g1;TRINITY_DN77_c0_g1;TRINITY_DN52_c0_g1;TRINITY_DN39_c1_g1;TRINITY_DN4_c0_g1;TRINITY_DN9_c0_g1;TRINITY_DN12_c0_g1;TRINITY_DN55_c1_g1;TRINITY_DN55_c8_g1;TRINITY_DN70_c0_g2;TRINITY_DN21_c0_g3;TRINITY_DN54_c0_g1;TRINITY_DN35_c0_g1;TRINITY_DN97_c2_g1;TRINITY_DN74_c0_g1;TRINITY_DN20_c0_g1;TRINITY_DN20_c0_g2;TRINITY_DN50_c5_g1;TRINITY_DN50_c1_g1;TRINITY_DN78_c12_g1;TRINITY_DN3_c0_g1;TR…
extracellular exosome	cellular_component	GO:0070062	4953	TRINITY_DN85_c0_g1;TRINITY_DN39_c1_g2;TRINITY_DN24_c0_g1;TRINITY_DN9_c0_g1;TRINITY_DN93_c8_g1;TRINITY_DN17_c0_g1;TRINITY_DN55_c3_g1;TRINITY_DN55_c8_g1;TRINITY_DN21_c2_g1;TRINITY_DN35_c0_g1;TRINITY_DN97_c0_g1;TRINITY_DN97_c3_g1;TRINITY_DN47_c0_g1;TRINITY_DN20_c0_g1;TRINITY_DN20_c0_g2;TRINITY_DN50_c3_g1;TRINITY_DN5_c0_g1;TRINITY_DN10_c3_g1;TRINITY_DN78_c12_g1;TRINITY_DN3_c0_g1;TRINITY_DN86_c2_g1;TR…
endonuclease activity	molecular_function	GO:0004519	4605	TRINITY_DN9_c11_g1;TRINITY_DN55_c9_g1;TRINITY_DN55_c6_g1;TRINITY_DN1_c4_g1;TRINITY_DN1_c4_g2;TRINITY_DN1_c2_g1;TRINITY_DN1_c8_g1;TRINITY_DN1_c111_g1;TRINITY_DN1_c79_g1;TRINITY_DN1_c161_g1;TRINITY_DN1_c5_g1;TRINITY_DN1_c10_g1;TRINITY_DN1_c142_g1;TRINITY_DN1_c54_g1;TRINITY_DN143_c0_g1;TRINITY_DN205_c4_g1;TRINITY_DN205_c7_g1;TRINITY_DN252_c0_g1;TRINITY_DN239_c13_g1;TRINITY_DN239_c0_g1;TRINITY_DN239_…
membrane	cellular_component	GO:0016020	4465	TRINITY_DN39_c1_g2;TRINITY_DN9_c0_g1;TRINITY_DN93_c1_g1;TRINITY_DN93_c8_g1;TRINITY_DN17_c0_g1;TRINITY_DN46_c0_g3;TRINITY_DN92_c2_g1;TRINITY_DN55_c3_g1;TRINITY_DN55_c3_g2;TRINITY_DN55_c8_g1;TRINITY_DN37_c0_g1;TRINITY_DN21_c0_g3;TRINITY_DN27_c0_g1;TRINITY_DN97_c2_g1;TRINITY_DN74_c2_g1;TRINITY_DN83_c0_g1;TRINITY_DN32_c0_g1;TRINITY_DN20_c0_g1;TRINITY_DN10_c1_g1;TRINITY_DN78_c12_g1;TRINITY_DN98_c0_g1;…
nucleoplasm	cellular_component	GO:0005654	4341	TRINITY_DN85_c1_g1;TRINITY_DN85_c2_g1;TRINITY_DN52_c0_g2;TRINITY_DN12_c0_g1;TRINITY_DN93_c0_g1;TRINITY_DN80_c0_g1;TRINITY_DN17_c0_g1;TRINITY_DN17_c0_g3;TRINITY_DN46_c0_g1;TRINITY_DN46_c0_g2;TRINITY_DN46_c0_g3;TRINITY_DN92_c0_g1;TRINITY_DN55_c3_g2;TRINITY_DN55_c2_g2;TRINITY_DN70_c2_g1;TRINITY_DN7_c0_g1;TRINITY_DN89_c0_g2;TRINITY_DN37_c0_g1;TRINITY_DN21_c1_g1;TRINITY_DN21_c2_g1;TRINITY_DN72_c0_g1;T…
ATP binding	molecular_function	GO:0005524	4280	TRINITY_DN4_c0_g1;TRINITY_DN9_c0_g1;TRINITY_DN60_c3_g1;TRINITY_DN92_c0_g1;TRINITY_DN70_c1_g1;TRINITY_DN70_c2_g1;TRINITY_DN21_c0_g1;TRINITY_DN35_c0_g1;TRINITY_DN20_c0_g1;TRINITY_DN20_c0_g2;TRINITY_DN20_c0_g3;TRINITY_DN5_c0_g2;TRINITY_DN81_c0_g1;TRINITY_DN81_c0_g2;TRINITY_DN86_c3_g1;TRINITY_DN86_c3_g3;TRINITY_DN86_c3_g2;TRINITY_DN86_c3_g4;TRINITY_DN86_c1_g1;TRINITY_DN65_c1_g1;TRINITY_DN22_c0_g4;TRI…
transcription, DNA-templated	biological_process	GO:0006351	3648	TRINITY_DN85_c5_g1;TRINITY_DN85_c1_g1;TRINITY_DN52_c0_g2;TRINITY_DN4_c0_g1;TRINITY_DN9_c4_g1;TRINITY_DN60_c0_g1;TRINITY_DN93_c0_g1;TRINITY_DN46_c3_g1;TRINITY_DN92_c0_g1;TRINITY_DN73_c0_g1;TRINITY_DN73_c0_g2;TRINITY_DN55_c0_g1;TRINITY_DN7_c0_g1;TRINITY_DN7_c0_g2;TRINITY_DN89_c0_g1;TRINITY_DN37_c0_g1;TRINITY_DN21_c0_g3;TRINITY_DN97_c4_g1;TRINITY_DN74_c4_g2;TRINITY_DN50_c5_g1;TRINITY_DN10_c0_g1;TRIN…
DNA binding	molecular_function	GO:0003677	3289	TRINITY_DN9_c4_g1;TRINITY_DN73_c1_g1;TRINITY_DN73_c0_g1;TRINITY_DN73_c0_g2;TRINITY_DN55_c3_g2;TRINITY_DN55_c2_g2;TRINITY_DN7_c0_g1;TRINITY_DN7_c0_g2;TRINITY_DN89_c0_g1;TRINITY_DN74_c4_g2;TRINITY_DN38_c1_g1;TRINITY_DN42_c0_g2;TRINITY_DN98_c1_g4;TRINITY_DN44_c0_g1;TRINITY_DN40_c0_g1;TRINITY_DN43_c0_g1;TRINITY_DN45_c0_g1;TRINITY_DN2_c0_g1;TRINITY_DN2_c0_g2;TRINITY_DN1_c2_g1;TRINITY_DN1_c6_g1;TRINITY…
zinc ion binding	molecular_function	GO:0008270	2912	TRINITY_DN85_c2_g1;TRINITY_DN77_c0_g1;TRINITY_DN52_c0_g2;TRINITY_DN60_c0_g1;TRINITY_DN93_c0_g1;TRINITY_DN93_c0_g2;TRINITY_DN93_c1_g1;TRINITY_DN55_c3_g1;TRINITY_DN21_c0_g1;TRINITY_DN21_c2_g1;TRINITY_DN36_c0_g1;TRINITY_DN19_c1_g1;TRINITY_DN86_c2_g1;TRINITY_DN42_c0_g1;TRINITY_DN8_c1_g1;TRINITY_DN22_c1_g2;TRINITY_DN45_c0_g1;TRINITY_DN0_c2_g1;TRINITY_DN66_c1_g2;TRINITY_DN66_c1_g1;TRINITY_DN66_c0_g1;TR…
mitochondrion	cellular_component	GO:0005739	2461	TRINITY_DN52_c0_g1;TRINITY_DN9_c0_g1;TRINITY_DN9_c4_g1;TRINITY_DN79_c0_g1;TRINITY_DN46_c0_g1;TRINITY_DN46_c0_g2;TRINITY_DN70_c1_g1;TRINITY_DN89_c0_g2;TRINITY_DN72_c2_g2;TRINITY_DN97_c0_g1;TRINITY_DN47_c0_g1;TRINITY_DN32_c0_g1;TRINITY_DN50_c2_g1;TRINITY_DN78_c1_g1;TRINITY_DN3_c9_g2;TRINITY_DN38_c1_g1;TRINITY_DN86_c7_g1;TRINITY_DN8_c0_g1;TRINITY_DN40_c0_g1;TRINITY_DN94_c1_g1;TRINITY_DN34_c0_g1;TRIN…
poly(A) RNA binding	molecular_function	GO:0044822	2426	TRINITY_DN85_c2_g1;TRINITY_DN39_c1_g2;TRINITY_DN93_c1_g1;TRINITY_DN46_c0_g3;TRINITY_DN73_c1_g1;TRINITY_DN55_c3_g2;TRINITY_DN36_c0_g1;TRINITY_DN74_c2_g1;TRINITY_DN50_c5_g1;TRINITY_DN50_c3_g1;TRINITY_DN5_c0_g2;TRINITY_DN81_c0_g1;TRINITY_DN81_c0_g2;TRINITY_DN78_c12_g1;TRINITY_DN78_c1_g1;TRINITY_DN38_c1_g1;TRINITY_DN98_c1_g1;TRINITY_DN0_c1_g1;TRINITY_DN0_c5_g1;TRINITY_DN88_c0_g1;TRINITY_DN11_c0_g1;TR…
regulation of transcription, DNA-templated	biological_process	GO:0006355	2221	TRINITY_DN52_c0_g2;TRINITY_DN60_c0_g1;TRINITY_DN92_c0_g1;TRINITY_DN73_c1_g1;TRINITY_DN73_c0_g1;TRINITY_DN73_c0_g2;TRINITY_DN89_c0_g1;TRINITY_DN21_c0_g1;TRINITY_DN36_c0_g1;TRINITY_DN74_c4_g2;TRINITY_DN50_c5_g1;TRINITY_DN10_c0_g1;TRINITY_DN10_c0_g2;TRINITY_DN38_c1_g1;TRINITY_DN42_c0_g1;TRINITY_DN98_c1_g4;TRINITY_DN40_c0_g1;TRINITY_DN2_c0_g1;TRINITY_DN2_c0_g2;TRINITY_DN49_c0_g1;TRINITY_DN76_c0_g4;TR…
nucleolus	cellular_component	GO:0005730	2142	TRINITY_DN85_c2_g1;TRINITY_DN93_c1_g1;TRINITY_DN97_c4_g1;TRINITY_DN74_c2_g1;TRINITY_DN32_c0_g1;TRINITY_DN50_c3_g1;TRINITY_DN5_c0_g2;TRINITY_DN78_c1_g1;TRINITY_DN38_c1_g1;TRINITY_DN98_c1_g1;TRINITY_DN30_c2_g1;TRINITY_DN62_c0_g1;TRINITY_DN40_c0_g1;TRINITY_DN88_c0_g1;TRINITY_DN1_c7_g1;TRINITY_DN1_c9_g1;TRINITY_DN49_c0_g1;TRINITY_DN11_c0_g1;TRINITY_DN11_c1_g1;TRINITY_DN33_c3_g2;TRINITY_DN28_c0_g2;TRI…
Golgi apparatus	cellular_component	GO:0005794	1871	TRINITY_DN93_c4_g1;TRINITY_DN17_c0_g3;TRINITY_DN46_c0_g3;TRINITY_DN55_c8_g1;TRINITY_DN74_c1_g1;TRINITY_DN86_c3_g2;TRINITY_DN86_c1_g1;TRINITY_DN56_c2_g2;TRINITY_DN56_c1_g1;TRINITY_DN8_c1_g1;TRINITY_DN44_c0_g1;TRINITY_DN0_c5_g1;TRINITY_DN1_c3_g1;TRINITY_DN1_c1_g1;TRINITY_DN49_c0_g1;TRINITY_DN11_c1_g1;TRINITY_DN180_c0_g1;TRINITY_DN192_c2_g1;TRINITY_DN153_c0_g4;TRINITY_DN153_c0_g5;TRINITY_DN153_c0_g6…
extracellular space	cellular_component	GO:0005615	1758	TRINITY_DN59_c0_g1;TRINITY_DN93_c4_g1;TRINITY_DN27_c0_g1;TRINITY_DN97_c3_g1;TRINITY_DN78_c12_g1;TRINITY_DN78_c6_g1;TRINITY_DN86_c2_g1;TRINITY_DN86_c8_g1;TRINITY_DN41_c0_g2;TRINITY_DN98_c1_g5;TRINITY_DN61_c0_g1;TRINITY_DN13_c0_g1;TRINITY_DN13_c0_g2;TRINITY_DN28_c0_g3;TRINITY_DN48_c1_g1;TRINITY_DN14_c0_g1;TRINITY_DN23_c2_g1;TRINITY_DN153_c1_g1;TRINITY_DN155_c1_g1;TRINITY_DN125_c1_g1;TRINITY_DN132_c…
integral component of plasma membrane	cellular_component	GO:0005887	1596	TRINITY_DN27_c0_g1;TRINITY_DN97_c0_g1;TRINITY_DN83_c1_g1;TRINITY_DN86_c3_g1;TRINITY_DN86_c3_g3;TRINITY_DN86_c3_g2;TRINITY_DN86_c1_g1;TRINITY_DN98_c1_g1;TRINITY_DN8_c1_g1;TRINITY_DN61_c0_g1;TRINITY_DN62_c2_g1;TRINITY_DN63_c0_g1;TRINITY_DN76_c0_g5;TRINITY_DN13_c0_g1;TRINITY_DN75_c1_g1;TRINITY_DN48_c1_g1;TRINITY_DN26_c0_g1;TRINITY_DN164_c0_g1;TRINITY_DN164_c0_g2;TRINITY_DN164_c1_g1;TRINITY_DN101_c1_…
perinuclear region of cytoplasm	cellular_component	GO:0048471	1584	TRINITY_DN12_c0_g1;TRINITY_DN93_c4_g1;TRINITY_DN93_c1_g1;TRINITY_DN17_c0_g1;TRINITY_DN46_c0_g3;TRINITY_DN55_c8_g1;TRINITY_DN72_c0_g1;TRINITY_DN72_c0_g2;TRINITY_DN74_c0_g1;TRINITY_DN50_c1_g1;TRINITY_DN38_c1_g1;TRINITY_DN86_c3_g2;TRINITY_DN8_c1_g1;TRINITY_DN0_c5_g1;TRINITY_DN1_c3_g1;TRINITY_DN1_c3_g2;TRINITY_DN49_c4_g1;TRINITY_DN49_c2_g1;TRINITY_DN11_c2_g1;TRINITY_DN103_c1_g1;TRINITY_DN125_c1_g1;TR…
negative regulation of transcription from RNA polymerase II promoter	biological_process	GO:0000122	1559	TRINITY_DN85_c5_g1;TRINITY_DN85_c1_g1;TRINITY_DN52_c0_g2;TRINITY_DN55_c8_g1;TRINITY_DN97_c4_g1;TRINITY_DN86_c8_g1;TRINITY_DN86_c3_g1;TRINITY_DN86_c3_g3;TRINITY_DN86_c3_g2;TRINITY_DN86_c3_g4;TRINITY_DN42_c0_g2;TRINITY_DN8_c1_g1;TRINITY_DN22_c1_g2;TRINITY_DN43_c0_g1;TRINITY_DN45_c1_g1;TRINITY_DN76_c11_g1;TRINITY_DN75_c1_g2;TRINITY_DN11_c0_g1;TRINITY_DN103_c0_g1;TRINITY_DN180_c0_g2;TRINITY_DN180_c1_…
positive regulation of transcription from RNA polymerase II promoter	biological_process	GO:0045944	1521	TRINITY_DN9_c4_g1;TRINITY_DN21_c1_g1;TRINITY_DN83_c1_g1;TRINITY_DN32_c0_g1;TRINITY_DN50_c5_g1;TRINITY_DN10_c3_g1;TRINITY_DN86_c8_g1;TRINITY_DN61_c2_g1;TRINITY_DN44_c0_g1;TRINITY_DN62_c2_g1;TRINITY_DN62_c0_g1;TRINITY_DN45_c0_g1;TRINITY_DN1_c0_g1;TRINITY_DN76_c11_g1;TRINITY_DN13_c2_g2;TRINITY_DN13_c2_g1;TRINITY_DN75_c0_g1;TRINITY_DN75_c1_g2;TRINITY_DN11_c0_g1;TRINITY_DN180_c0_g2;TRINITY_DN153_c1_g1…
endoplasmic reticulum	cellular_component	GO:0005783	1457	TRINITY_DN77_c0_g1;TRINITY_DN59_c0_g1;TRINITY_DN93_c4_g1;TRINITY_DN92_c2_g1;TRINITY_DN97_c0_g1;TRINITY_DN97_c3_g1;TRINITY_DN97_c2_g1;TRINITY_DN50_c1_g1;TRINITY_DN38_c1_g1;TRINITY_DN86_c8_g1;TRINITY_DN86_c9_g2;TRINITY_DN86_c3_g2;TRINITY_DN86_c1_g1;TRINITY_DN62_c2_g1;TRINITY_DN88_c1_g2;TRINITY_DN11_c1_g1;TRINITY_DN11_c2_g1;TRINITY_DN14_c0_g1;TRINITY_DN153_c0_g4;TRINITY_DN153_c0_g5;TRINITY_DN153_c0_…
extracellular region	cellular_component	GO:0005576	1451	TRINITY_DN93_c4_g1;TRINITY_DN7_c1_g3;TRINITY_DN86_c3_g1;TRINITY_DN86_c3_g3;TRINITY_DN86_c3_g2;TRINITY_DN86_c1_g1;TRINITY_DN41_c0_g2;TRINITY_DN8_c1_g1;TRINITY_DN1_c3_g1;TRINITY_DN1_c3_g2;TRINITY_DN13_c0_g1;TRINITY_DN11_c1_g1;TRINITY_DN58_c0_g1;TRINITY_DN28_c0_g3;TRINITY_DN14_c0_g1;TRINITY_DN26_c1_g1;TRINITY_DN132_c0_g2;TRINITY_DN152_c0_g2;TRINITY_DN152_c0_g3;TRINITY_DN195_c0_g1;TRINITY_DN165_c3_g1…
endoplasmic reticulum membrane	cellular_component	GO:0005789	1376	TRINITY_DN77_c0_g1;TRINITY_DN68_c0_g1;TRINITY_DN21_c0_g2;TRINITY_DN50_c1_g1;TRINITY_DN50_c2_g1;TRINITY_DN86_c9_g2;TRINITY_DN62_c2_g1;TRINITY_DN0_c6_g1;TRINITY_DN76_c0_g1;TRINITY_DN75_c0_g1;TRINITY_DN48_c1_g1;TRINITY_DN14_c0_g1;TRINITY_DN167_c0_g1;TRINITY_DN192_c0_g2;TRINITY_DN118_c0_g1;TRINITY_DN120_c1_g1;TRINITY_DN115_c1_g2;TRINITY_DN152_c0_g2;TRINITY_DN152_c0_g3;TRINITY_DN195_c1_g1;TRINITY_DN15…
transcription factor activity, sequence-specific DNA binding	molecular_function	GO:0003700	1368	TRINITY_DN92_c0_g1;TRINITY_DN89_c0_g2;TRINITY_DN36_c0_g1;TRINITY_DN97_c4_g1;TRINITY_DN15_c0_g1;TRINITY_DN71_c0_g1;TRINITY_DN40_c0_g1;TRINITY_DN45_c1_g1;TRINITY_DN13_c2_g2;TRINITY_DN13_c2_g1;TRINITY_DN75_c1_g2;TRINITY_DN103_c0_g1;TRINITY_DN177_c0_g2;TRINITY_DN133_c1_g2;TRINITY_DN165_c1_g4;TRINITY_DN159_c2_g1;TRINITY_DN109_c1_g1;TRINITY_DN110_c4_g1;TRINITY_DN121_c0_g1;TRINITY_DN135_c0_g1;TRINITY_DN…
calcium ion binding	molecular_function	GO:0005509	1218	TRINITY_DN5_c0_g1;TRINITY_DN78_c12_g1;TRINITY_DN38_c0_g2;TRINITY_DN86_c7_g1;TRINITY_DN98_c1_g1;TRINITY_DN29_c1_g1;TRINITY_DN62_c2_g1;TRINITY_DN99_c2_g1;TRINITY_DN192_c2_g1;TRINITY_DN152_c0_g2;TRINITY_DN152_c0_g3;TRINITY_DN195_c0_g1;TRINITY_DN151_c6_g1;TRINITY_DN114_c0_g2;TRINITY_DN181_c0_g1;TRINITY_DN136_c0_g1;TRINITY_DN178_c0_g1;TRINITY_DN258_c7_g1;TRINITY_DN226_c0_g1;TRINITY_DN380_c1_g2;TRINITY…
signal transduction	biological_process	GO:0007165	1144	TRINITY_DN35_c0_g1;TRINITY_DN38_c0_g2;TRINITY_DN8_c1_g1;TRINITY_DN63_c0_g1;TRINITY_DN1_c3_g1;TRINITY_DN1_c3_g2;TRINITY_DN1_c0_g1;TRINITY_DN84_c0_g1;TRINITY_DN13_c0_g1;TRINITY_DN31_c0_g1;TRINITY_DN33_c3_g2;TRINITY_DN14_c0_g1;TRINITY_DN87_c0_g4;TRINITY_DN87_c0_g1;TRINITY_DN103_c0_g1;TRINITY_DN196_c0_g2;TRINITY_DN175_c0_g1;TRINITY_DN152_c0_g2;TRINITY_DN108_c0_g1;TRINITY_DN110_c4_g1;TRINITY_DN181_c0_…
intracellular membrane-bounded organelle	cellular_component	GO:0043231	1092	TRINITY_DN59_c0_g1;TRINITY_DN12_c0_g1;TRINITY_DN68_c0_g1;TRINITY_DN93_c0_g1;TRINITY_DN17_c0_g1;TRINITY_DN17_c0_g3;TRINITY_DN50_c1_g1;TRINITY_DN78_c12_g1;TRINITY_DN8_c1_g1;TRINITY_DN44_c0_g1;TRINITY_DN2_c0_g1;TRINITY_DN0_c6_g1;TRINITY_DN75_c1_g1;TRINITY_DN48_c1_g1;TRINITY_DN14_c0_g1;TRINITY_DN184_c2_g1;TRINITY_DN164_c1_g1;TRINITY_DN123_c0_g1;TRINITY_DN185_c0_g1;TRINITY_DN185_c0_g2;TRINITY_DN113_c1…
identical protein binding	molecular_function	GO:0042802	1087	TRINITY_DN47_c0_g1;TRINITY_DN20_c0_g1;TRINITY_DN20_c0_g2;TRINITY_DN78_c6_g1;TRINITY_DN15_c0_g1;TRINITY_DN86_c8_g1;TRINITY_DN86_c3_g1;TRINITY_DN86_c3_g3;TRINITY_DN86_c3_g4;TRINITY_DN62_c2_g1;TRINITY_DN45_c0_g1;TRINITY_DN13_c2_g2;TRINITY_DN13_c0_g1;TRINITY_DN13_c2_g1;TRINITY_DN11_c1_g1;TRINITY_DN33_c3_g2;TRINITY_DN192_c0_g4;TRINITY_DN192_c0_g5;TRINITY_DN112_c1_g1;TRINITY_DN132_c0_g2;TRINITY_DN184_c…
nucleotide binding	molecular_function	GO:0000166	1077	TRINITY_DN85_c2_g1;TRINITY_DN74_c2_g1;TRINITY_DN32_c0_g1;TRINITY_DN42_c0_g3;TRINITY_DN42_c2_g1;TRINITY_DN30_c2_g1;TRINITY_DN1_c7_g1;TRINITY_DN1_c9_g1;TRINITY_DN161_c0_g1;TRINITY_DN185_c0_g1;TRINITY_DN185_c0_g2;TRINITY_DN111_c0_g1;TRINITY_DN165_c0_g1;TRINITY_DN165_c0_g2;TRINITY_DN176_c0_g1;TRINITY_DN209_c0_g2;TRINITY_DN200_c4_g1;TRINITY_DN251_c0_g1;TRINITY_DN251_c1_g3;TRINITY_DN291_c1_g1;TRINITY_D…
intracellular	cellular_component	GO:0005622	1073	TRINITY_DN77_c0_g1;TRINITY_DN55_c1_g1;TRINITY_DN54_c0_g1;TRINITY_DN97_c4_g1;TRINITY_DN97_c1_g1;TRINITY_DN41_c0_g2;TRINITY_DN0_c15_g1;TRINITY_DN84_c0_g1;TRINITY_DN96_c0_g1;TRINITY_DN25_c0_g2;TRINITY_DN103_c1_g1;TRINITY_DN143_c0_g1;TRINITY_DN125_c2_g1;TRINITY_DN184_c0_g1;TRINITY_DN196_c0_g1;TRINITY_DN196_c0_g2;TRINITY_DN122_c0_g1;TRINITY_DN122_c0_g2;TRINITY_DN151_c2_g3;TRINITY_DN108_c0_g1;TRINITY_D…
innate immune response	biological_process	GO:0045087	1050	TRINITY_DN89_c0_g2;TRINITY_DN54_c0_g1;TRINITY_DN35_c0_g1;TRINITY_DN5_c0_g2;TRINITY_DN78_c6_g1;TRINITY_DN15_c0_g1;TRINITY_DN86_c2_g1;TRINITY_DN86_c3_g1;TRINITY_DN86_c3_g3;TRINITY_DN86_c3_g2;TRINITY_DN86_c1_g1;TRINITY_DN56_c2_g2;TRINITY_DN45_c0_g1;TRINITY_DN49_c1_g1;TRINITY_DN26_c0_g2;TRINITY_DN118_c1_g1;TRINITY_DN125_c1_g1;TRINITY_DN152_c0_g2;TRINITY_DN189_c1_g1;TRINITY_DN165_c3_g1;TRINITY_DN165_c…
protein homodimerization activity	molecular_function	GO:0042803	1045	TRINITY_DN93_c4_g1;TRINITY_DN21_c1_g1;TRINITY_DN83_c1_g1;TRINITY_DN20_c0_g2;TRINITY_DN15_c0_g1;TRINITY_DN86_c3_g1;TRINITY_DN86_c3_g3;TRINITY_DN86_c3_g4;TRINITY_DN29_c5_g1;TRINITY_DN29_c1_g1;TRINITY_DN62_c2_g1;TRINITY_DN69_c2_g2;TRINITY_DN49_c1_g1;TRINITY_DN13_c2_g2;TRINITY_DN13_c2_g1;TRINITY_DN75_c1_g2;TRINITY_DN11_c1_g1;TRINITY_DN104_c0_g1;TRINITY_DN132_c0_g2;TRINITY_DN115_c0_g2;TRINITY_DN101_c0…
RNA binding	molecular_function	GO:0003723	1041	TRINITY_DN85_c2_g1;TRINITY_DN93_c1_g1;TRINITY_DN46_c0_g3;TRINITY_DN36_c0_g1;TRINITY_DN19_c1_g1;TRINITY_DN74_c1_g1;TRINITY_DN75_c6_g1;TRINITY_DN11_c1_g1;TRINITY_DN14_c0_g1;TRINITY_DN150_c1_g1;TRINITY_DN150_c0_g1;TRINITY_DN125_c14_g1;TRINITY_DN158_c0_g1;TRINITY_DN165_c0_g1;TRINITY_DN165_c0_g2;TRINITY_DN140_c1_g1;TRINITY_DN176_c0_g1;TRINITY_DN174_c7_g1;TRINITY_DN113_c0_g1;TRINITY_DN219_c1_g2;TRINITY…
positive regulation of transcription, DNA-templated	biological_process	GO:0045893	1008	TRINITY_DN85_c1_g1;TRINITY_DN52_c0_g2;TRINITY_DN93_c0_g1;TRINITY_DN46_c3_g1;TRINITY_DN21_c0_g3;TRINITY_DN10_c3_g1;TRINITY_DN8_c1_g1;TRINITY_DN62_c0_g1;TRINITY_DN40_c0_g1;TRINITY_DN45_c0_g1;TRINITY_DN45_c1_g1;TRINITY_DN76_c0_g2;TRINITY_DN13_c2_g2;TRINITY_DN13_c2_g1;TRINITY_DN75_c1_g2;TRINITY_DN11_c0_g1;TRINITY_DN125_c0_g1;TRINITY_DN125_c1_g1;TRINITY_DN164_c1_g1;TRINITY_DN133_c1_g2;TRINITY_DN165_c0…
protein ubiquitination	biological_process	GO:0016567	1002	TRINITY_DN60_c0_g1;TRINITY_DN55_c8_g1;TRINITY_DN22_c1_g2;TRINITY_DN76_c0_g3;TRINITY_DN48_c0_g1;TRINITY_DN26_c0_g2;TRINITY_DN192_c1_g4;TRINITY_DN143_c0_g1;TRINITY_DN115_c1_g3;TRINITY_DN188_c2_g1;TRINITY_DN194_c0_g2;TRINITY_DN186_c3_g1;TRINITY_DN242_c4_g1;TRINITY_DN227_c0_g1;TRINITY_DN255_c8_g1;TRINITY_DN222_c0_g1;TRINITY_DN264_c0_g1;TRINITY_DN264_c2_g2;TRINITY_DN352_c0_g2;TRINITY_DN340_c0_g1;TRINI…
ligase activity	molecular_function	GO:0016874	995	TRINITY_DN85_c5_g1;TRINITY_DN60_c0_g1;TRINITY_DN55_c3_g1;TRINITY_DN55_c8_g1;TRINITY_DN21_c0_g1;TRINITY_DN22_c1_g2;TRINITY_DN45_c0_g1;TRINITY_DN76_c0_g3;TRINITY_DN26_c0_g2;TRINITY_DN192_c1_g4;TRINITY_DN105_c5_g1;TRINITY_DN133_c1_g1;TRINITY_DN111_c2_g1;TRINITY_DN194_c0_g2;TRINITY_DN186_c3_g1;TRINITY_DN242_c4_g1;TRINITY_DN222_c0_g1;TRINITY_DN222_c0_g2;TRINITY_DN257_c1_g1;TRINITY_DN264_c0_g1;TRINITY_…
cell surface	cellular_component	GO:0009986	911	TRINITY_DN97_c0_g1;TRINITY_DN78_c12_g1;TRINITY_DN86_c3_g2;TRINITY_DN84_c0_g1;TRINITY_DN11_c1_g1;TRINITY_DN28_c0_g3;TRINITY_DN67_c0_g1;TRINITY_DN103_c1_g1;TRINITY_DN192_c2_g1;TRINITY_DN152_c0_g2;TRINITY_DN152_c0_g3;TRINITY_DN101_c0_g1;TRINITY_DN194_c0_g1;TRINITY_DN121_c0_g1;TRINITY_DN172_c0_g1;TRINITY_DN157_c0_g1;TRINITY_DN156_c1_g2;TRINITY_DN191_c0_g1;TRINITY_DN214_c0_g2;TRINITY_DN259_c4_g2;TRINI…
chromatin binding	molecular_function	GO:0003682	902	TRINITY_DN85_c5_g1;TRINITY_DN52_c0_g2;TRINITY_DN60_c0_g1;TRINITY_DN55_c3_g2;TRINITY_DN97_c4_g1;TRINITY_DN50_c5_g1;TRINITY_DN62_c0_g1;TRINITY_DN40_c0_g1;TRINITY_DN13_c2_g2;TRINITY_DN13_c2_g1;TRINITY_DN31_c0_g1;TRINITY_DN75_c1_g2;TRINITY_DN11_c0_g1;TRINITY_DN33_c3_g2;TRINITY_DN14_c0_g1;TRINITY_DN128_c4_g1;TRINITY_DN184_c2_g1;TRINITY_DN189_c0_g1;TRINITY_DN165_c0_g2;TRINITY_DN165_c1_g3;TRINITY_DN165_…
apoptotic process	biological_process	GO:0006915	893	TRINITY_DN39_c1_g2;TRINITY_DN21_c0_g1;TRINITY_DN74_c0_g1;TRINITY_DN74_c0_g3;TRINITY_DN32_c0_g1;TRINITY_DN86_c3_g2;TRINITY_DN44_c0_g1;TRINITY_DN40_c0_g1;TRINITY_DN49_c4_g1;TRINITY_DN13_c2_g2;TRINITY_DN13_c2_g1;TRINITY_DN51_c1_g2;TRINITY_DN103_c1_g1;TRINITY_DN180_c1_g1;TRINITY_DN150_c1_g1;TRINITY_DN165_c1_g2;TRINITY_DN159_c1_g1;TRINITY_DN121_c3_g1;TRINITY_DN100_c0_g1;TRINITY_DN100_c1_g1;TRINITY_DN2…
focal adhesion	cellular_component	GO:0005925	890	TRINITY_DN21_c0_g1;TRINITY_DN72_c2_g2;TRINITY_DN56_c2_g2;TRINITY_DN98_c1_g1;TRINITY_DN22_c0_g5;TRINITY_DN0_c5_g1;TRINITY_DN1_c0_g1;TRINITY_DN84_c0_g1;TRINITY_DN49_c2_g1;TRINITY_DN11_c1_g1;TRINITY_DN96_c0_g1;TRINITY_DN48_c0_g1;TRINITY_DN132_c0_g1;TRINITY_DN195_c0_g1;TRINITY_DN151_c6_g1;TRINITY_DN119_c0_g1;TRINITY_DN176_c2_g2;TRINITY_DN121_c0_g1;TRINITY_DN181_c0_g1;TRINITY_DN136_c5_g1;TRINITY_DN157…
negative regulation of transcription, DNA-templated	biological_process	GO:0045892	884	TRINITY_DN85_c5_g1;TRINITY_DN85_c1_g1;TRINITY_DN4_c0_g1;TRINITY_DN60_c0_g1;TRINITY_DN46_c3_g1;TRINITY_DN37_c0_g1;TRINITY_DN97_c4_g1;TRINITY_DN86_c8_g1;TRINITY_DN42_c0_g2;TRINITY_DN8_c1_g1;TRINITY_DN22_c1_g2;TRINITY_DN40_c0_g1;TRINITY_DN45_c1_g1;TRINITY_DN0_c13_g1;TRINITY_DN49_c1_g1;TRINITY_DN11_c0_g1;TRINITY_DN33_c3_g2;TRINITY_DN103_c0_g1;TRINITY_DN184_c0_g1;TRINITY_DN189_c0_g1;TRINITY_DN195_c0_g…
Golgi membrane	cellular_component	GO:0000139	881	TRINITY_DN39_c1_g1;TRINITY_DN72_c2_g1;TRINITY_DN97_c4_g1;TRINITY_DN50_c1_g1;TRINITY_DN3_c0_g1;TRINITY_DN98_c0_g1;TRINITY_DN1_c3_g2;TRINITY_DN1_c1_g1;TRINITY_DN143_c0_g1;TRINITY_DN104_c0_g1;TRINITY_DN128_c0_g2;TRINITY_DN128_c1_g1;TRINITY_DN152_c0_g2;TRINITY_DN152_c0_g3;TRINITY_DN173_c0_g1;TRINITY_DN173_c6_g1;TRINITY_DN133_c0_g1;TRINITY_DN144_c0_g1;TRINITY_DN174_c0_g1;TRINITY_DN114_c0_g1;TRINITY_DN…
protein transport	biological_process	GO:0015031	859	TRINITY_DN21_c0_g3;TRINITY_DN50_c1_g1;TRINITY_DN81_c1_g1;TRINITY_DN78_c0_g2;TRINITY_DN41_c0_g2;TRINITY_DN29_c5_g1;TRINITY_DN91_c0_g1;TRINITY_DN0_c4_g1;TRINITY_DN0_c5_g1;TRINITY_DN167_c1_g1;TRINITY_DN180_c1_g1;TRINITY_DN196_c0_g2;TRINITY_DN134_c1_g1;TRINITY_DN195_c1_g1;TRINITY_DN151_c6_g1;TRINITY_DN130_c5_g1;TRINITY_DN114_c0_g2;TRINITY_DN124_c0_g1;TRINITY_DN124_c0_g2;TRINITY_DN191_c1_g1;TRINITY_DN…
small GTPase mediated signal transduction	biological_process	GO:0007264	843	TRINITY_DN92_c2_g1;TRINITY_DN55_c1_g1;TRINITY_DN54_c0_g1;TRINITY_DN97_c2_g1;TRINITY_DN86_c2_g1;TRINITY_DN86_c3_g1;TRINITY_DN86_c3_g3;TRINITY_DN86_c3_g2;TRINITY_DN86_c1_g1;TRINITY_DN56_c2_g2;TRINITY_DN0_c15_g1;TRINITY_DN1_c1_g1;TRINITY_DN75_c0_g1;TRINITY_DN23_c2_g1;TRINITY_DN177_c6_g1;TRINITY_DN163_c1_g1;TRINITY_DN124_c0_g1;TRINITY_DN124_c0_g2;TRINITY_DN181_c0_g1;TRINITY_DN178_c0_g2;TRINITY_DN135_…
negative regulation of apoptotic process	biological_process	GO:0043066	823	TRINITY_DN70_c2_g1;TRINITY_DN47_c0_g1;TRINITY_DN10_c3_g1;TRINITY_DN71_c0_g1;TRINITY_DN29_c5_g1;TRINITY_DN45_c1_g1;TRINITY_DN13_c0_g2;TRINITY_DN11_c0_g1;TRINITY_DN125_c3_g1;TRINITY_DN125_c3_g2;TRINITY_DN196_c0_g2;TRINITY_DN111_c2_g1;TRINITY_DN178_c1_g1;TRINITY_DN157_c0_g1;TRINITY_DN240_c2_g1;TRINITY_DN235_c1_g1;TRINITY_DN217_c0_g3;TRINITY_DN264_c0_g1;TRINITY_DN264_c2_g2;TRINITY_DN283_c0_g1;TRINITY…
GTP binding	molecular_function	GO:0005525	822	TRINITY_DN60_c3_g1;TRINITY_DN92_c2_g1;TRINITY_DN97_c2_g1;TRINITY_DN65_c0_g1;TRINITY_DN65_c0_g3;TRINITY_DN22_c0_g5;TRINITY_DN22_c0_g1;TRINITY_DN22_c0_g2;TRINITY_DN22_c0_g3;TRINITY_DN88_c0_g1;TRINITY_DN34_c0_g1;TRINITY_DN1_c1_g1;TRINITY_DN75_c0_g1;TRINITY_DN23_c2_g1;TRINITY_DN177_c6_g1;TRINITY_DN164_c1_g1;TRINITY_DN122_c1_g1;TRINITY_DN173_c0_g1;TRINITY_DN173_c6_g1;TRINITY_DN163_c1_g1;TRINITY_DN124_…
cell differentiation	biological_process	GO:0030154	819	TRINITY_DN85_c2_g1;TRINITY_DN17_c0_g1;TRINITY_DN5_c0_g2;TRINITY_DN38_c0_g2;TRINITY_DN86_c3_g2;TRINITY_DN41_c0_g2;TRINITY_DN42_c0_g3;TRINITY_DN22_c0_g5;TRINITY_DN44_c0_g1;TRINITY_DN0_c13_g1;TRINITY_DN11_c0_g1;TRINITY_DN153_c1_g1;TRINITY_DN105_c5_g1;TRINITY_DN152_c0_g2;TRINITY_DN165_c1_g4;TRINITY_DN157_c0_g1;TRINITY_DN219_c0_g1;TRINITY_DN219_c1_g2;TRINITY_DN246_c0_g1;TRINITY_DN230_c1_g5;TRINITY_DN2…
centrosome	cellular_component	GO:0005813	805	TRINITY_DN21_c0_g3;TRINITY_DN35_c0_g1;TRINITY_DN38_c1_g1;TRINITY_DN86_c5_g2;TRINITY_DN53_c0_g1;TRINITY_DN22_c0_g3;TRINITY_DN62_c0_g1;TRINITY_DN40_c0_g1;TRINITY_DN1_c0_g1;TRINITY_DN103_c1_g1;TRINITY_DN112_c1_g2;TRINITY_DN112_c1_g1;TRINITY_DN129_c0_g1;TRINITY_DN188_c0_g2;TRINITY_DN159_c0_g1;TRINITY_DN109_c1_g1;TRINITY_DN179_c0_g1;TRINITY_DN121_c1_g1;TRINITY_DN187_c0_g1;TRINITY_DN156_c1_g1;TRINITY_D…
gene expression	biological_process	GO:0010467	786	TRINITY_DN55_c3_g2;TRINITY_DN37_c0_g1;TRINITY_DN62_c0_g1;TRINITY_DN40_c0_g1;TRINITY_DN31_c1_g1;TRINITY_DN51_c1_g2;TRINITY_DN14_c0_g1;TRINITY_DN134_c1_g1;TRINITY_DN165_c0_g2;TRINITY_DN165_c1_g1;TRINITY_DN186_c1_g1;TRINITY_DN168_c0_g1;TRINITY_DN178_c1_g1;TRINITY_DN191_c2_g1;TRINITY_DN206_c1_g1;TRINITY_DN238_c0_g1;TRINITY_DN259_c2_g1;TRINITY_DN251_c1_g3;TRINITY_DN204_c0_g1;TRINITY_DN257_c2_g1;TRINIT…
cell junction	cellular_component	GO:0030054	780	TRINITY_DN21_c0_g1;TRINITY_DN10_c1_g1;TRINITY_DN11_c1_g1;TRINITY_DN48_c1_g1;TRINITY_DN196_c0_g2;TRINITY_DN152_c0_g2;TRINITY_DN152_c0_g3;TRINITY_DN134_c0_g1;TRINITY_DN151_c2_g3;TRINITY_DN114_c0_g1;TRINITY_DN136_c0_g1;TRINITY_DN182_c0_g1;TRINITY_DN156_c2_g1;TRINITY_DN249_c0_g1;TRINITY_DN214_c0_g2;TRINITY_DN254_c0_g1;TRINITY_DN205_c2_g1;TRINITY_DN234_c1_g1;TRINITY_DN231_c0_g1;TRINITY_DN299_c0_g1;TRI…
small molecule metabolic process	biological_process	GO:0044281	776	TRINITY_DN9_c0_g1;TRINITY_DN55_c1_g1;TRINITY_DN20_c0_g1;TRINITY_DN8_c0_g1;TRINITY_DN128_c2_g2;TRINITY_DN196_c0_g2;TRINITY_DN152_c0_g2;TRINITY_DN134_c1_g1;TRINITY_DN176_c4_g1;TRINITY_DN168_c2_g1;TRINITY_DN181_c0_g1;TRINITY_DN178_c1_g1;TRINITY_DN197_c1_g1;TRINITY_DN248_c0_g1;TRINITY_DN248_c0_g2;TRINITY_DN223_c0_g1;TRINITY_DN202_c1_g1;TRINITY_DN285_c0_g1;TRINITY_DN297_c3_g1;TRINITY_DN288_c6_g1;TRINI…
protein serine/threonine kinase activity	molecular_function	GO:0004674	759	TRINITY_DN70_c2_g1;TRINITY_DN21_c0_g1;TRINITY_DN35_c0_g1;TRINITY_DN5_c0_g2;TRINITY_DN81_c0_g1;TRINITY_DN81_c0_g2;TRINITY_DN65_c1_g1;TRINITY_DN49_c1_g1;TRINITY_DN11_c1_g2;TRINITY_DN99_c0_g1;TRINITY_DN196_c0_g1;TRINITY_DN196_c0_g2;TRINITY_DN115_c0_g1;TRINITY_DN183_c1_g1;TRINITY_DN197_c0_g1;TRINITY_DN197_c0_g2;TRINITY_DN270_c0_g1;TRINITY_DN261_c0_g1;TRINITY_DN283_c0_g1;TRINITY_DN380_c0_g1;TRINITY_DN…
membrane raft	cellular_component	GO:0045121	759	TRINITY_DN55_c8_g1;TRINITY_DN78_c12_g1;TRINITY_DN22_c0_g3;TRINITY_DN75_c0_g1;TRINITY_DN11_c1_g1;TRINITY_DN48_c1_g1;TRINITY_DN111_c2_g1;TRINITY_DN194_c0_g2;TRINITY_DN124_c0_g1;TRINITY_DN186_c3_g1;TRINITY_DN157_c0_g1;TRINITY_DN157_c1_g1;TRINITY_DN242_c4_g1;TRINITY_DN205_c2_g1;TRINITY_DN293_c0_g1;TRINITY_DN264_c2_g2;TRINITY_DN378_c0_g1;TRINITY_DN336_c0_g1;TRINITY_DN381_c1_g4;TRINITY_DN315_c0_g2;TRIN…
cytoskeleton	cellular_component	GO:0005856	743	TRINITY_DN39_c1_g2;TRINITY_DN72_c2_g1;TRINITY_DN27_c0_g1;TRINITY_DN10_c0_g1;TRINITY_DN10_c0_g2;TRINITY_DN0_c3_g1;TRINITY_DN49_c2_g1;TRINITY_DN23_c1_g1;TRINITY_DN120_c2_g1;TRINITY_DN115_c1_g2;TRINITY_DN146_c1_g1;TRINITY_DN136_c5_g1;TRINITY_DN157_c1_g1;TRINITY_DN156_c1_g1;TRINITY_DN214_c0_g1;TRINITY_DN200_c0_g1;TRINITY_DN268_c0_g1;TRINITY_DN205_c2_g1;TRINITY_DN217_c1_g1;TRINITY_DN299_c0_g1;TRINITY_…
cell adhesion	biological_process	GO:0007155	739	TRINITY_DN68_c1_g1;TRINITY_DN97_c0_g1;TRINITY_DN97_c2_g1;TRINITY_DN11_c1_g1;TRINITY_DN67_c0_g1;TRINITY_DN184_c1_g1;TRINITY_DN148_c0_g1;TRINITY_DN176_c2_g2;TRINITY_DN156_c2_g1;TRINITY_DN213_c0_g1;TRINITY_DN219_c3_g1;TRINITY_DN205_c0_g1;TRINITY_DN221_c0_g1;TRINITY_DN393_c0_g1;TRINITY_DN387_c2_g1;TRINITY_DN337_c0_g1;TRINITY_DN337_c0_g2;TRINITY_DN337_c0_g3;TRINITY_DN336_c0_g1;TRINITY_DN354_c5_g1;TRIN…
positive regulation of cell proliferation	biological_process	GO:0008284	731	TRINITY_DN70_c0_g2;TRINITY_DN5_c0_g2;TRINITY_DN10_c3_g1;TRINITY_DN86_c3_g1;TRINITY_DN86_c3_g3;TRINITY_DN86_c3_g2;TRINITY_DN86_c3_g4;TRINITY_DN86_c1_g1;TRINITY_DN71_c0_g1;TRINITY_DN42_c0_g2;TRINITY_DN22_c0_g3;TRINITY_DN45_c1_g1;TRINITY_DN66_c0_g1;TRINITY_DN11_c0_g1;TRINITY_DN11_c1_g1;TRINITY_DN184_c1_g1;TRINITY_DN164_c1_g1;TRINITY_DN195_c0_g1;TRINITY_DN110_c2_g2;TRINITY_DN178_c1_g1;TRINITY_DN267_c…
protein phosphorylation	biological_process	GO:0006468	726	TRINITY_DN70_c1_g1;TRINITY_DN35_c0_g1;TRINITY_DN5_c0_g2;TRINITY_DN86_c3_g1;TRINITY_DN86_c3_g3;TRINITY_DN65_c1_g1;TRINITY_DN11_c0_g1;TRINITY_DN196_c0_g2;TRINITY_DN183_c1_g1;TRINITY_DN152_c0_g2;TRINITY_DN148_c0_g1;TRINITY_DN223_c0_g1;TRINITY_DN223_c0_g2;TRINITY_DN259_c1_g1;TRINITY_DN244_c0_g1;TRINITY_DN251_c12_g1;TRINITY_DN270_c0_g1;TRINITY_DN261_c0_g1;TRINITY_DN217_c0_g3;TRINITY_DN299_c0_g1;TRINIT…
intracellular signal transduction	biological_process	GO:0035556	726	TRINITY_DN60_c3_g1;TRINITY_DN70_c1_g1;TRINITY_DN5_c0_g2;TRINITY_DN65_c0_g1;TRINITY_DN65_c0_g2;TRINITY_DN65_c0_g3;TRINITY_DN65_c1_g1;TRINITY_DN22_c0_g5;TRINITY_DN22_c0_g3;TRINITY_DN49_c1_g1;TRINITY_DN96_c0_g1;TRINITY_DN25_c0_g1;TRINITY_DN25_c0_g2;TRINITY_DN143_c0_g1;TRINITY_DN196_c0_g1;TRINITY_DN196_c0_g2;TRINITY_DN175_c0_g1;TRINITY_DN108_c1_g1;TRINITY_DN109_c1_g1;TRINITY_DN114_c0_g2;TRINITY_DN191…
sequence-specific DNA binding	molecular_function	GO:0043565	714	TRINITY_DN9_c4_g1;TRINITY_DN92_c0_g1;TRINITY_DN21_c1_g1;TRINITY_DN42_c0_g2;TRINITY_DN40_c0_g1;TRINITY_DN45_c1_g1;TRINITY_DN11_c0_g1;TRINITY_DN14_c0_g2;TRINITY_DN165_c1_g4;TRINITY_DN110_c4_g1;TRINITY_DN121_c0_g1;TRINITY_DN187_c0_g1;TRINITY_DN135_c0_g1;TRINITY_DN246_c0_g1;TRINITY_DN230_c1_g5;TRINITY_DN250_c2_g2;TRINITY_DN265_c0_g1;TRINITY_DN235_c0_g4;TRINITY_DN203_c1_g1;TRINITY_DN220_c2_g1;TRINITY_…
cell division	biological_process	GO:0051301	712	TRINITY_DN3_c0_g1;TRINITY_DN56_c0_g1;TRINITY_DN22_c0_g3;TRINITY_DN0_c28_g2;TRINITY_DN31_c0_g1;TRINITY_DN25_c0_g1;TRINITY_DN183_c0_g2;TRINITY_DN108_c2_g1;TRINITY_DN149_c0_g1;TRINITY_DN149_c0_g2;TRINITY_DN121_c1_g1;TRINITY_DN227_c0_g1;TRINITY_DN267_c2_g4;TRINITY_DN251_c2_g1;TRINITY_DN288_c1_g1;TRINITY_DN218_c0_g1;TRINITY_DN281_c1_g1;TRINITY_DN352_c3_g1;TRINITY_DN330_c0_g1;TRINITY_DN311_c0_g1;TRINIT…
protein complex	cellular_component	GO:0043234	700	TRINITY_DN21_c0_g1;TRINITY_DN21_c0_g3;TRINITY_DN11_c0_g1;TRINITY_DN112_c1_g2;TRINITY_DN112_c1_g1;TRINITY_DN125_c2_g1;TRINITY_DN115_c0_g2;TRINITY_DN151_c6_g1;TRINITY_DN109_c1_g1;TRINITY_DN110_c0_g1;TRINITY_DN110_c1_g3;TRINITY_DN110_c1_g2;TRINITY_DN110_c1_g1;TRINITY_DN124_c0_g1;TRINITY_DN121_c0_g1;TRINITY_DN191_c1_g1;TRINITY_DN206_c0_g1;TRINITY_DN244_c0_g1;TRINITY_DN245_c3_g1;TRINITY_DN205_c2_g1;TR…
positive regulation of GTPase activity	biological_process	GO:0043547	679	TRINITY_DN55_c1_g1;TRINITY_DN97_c2_g1;TRINITY_DN56_c1_g1;TRINITY_DN65_c0_g1;TRINITY_DN65_c0_g2;TRINITY_DN22_c0_g3;TRINITY_DN31_c1_g1;TRINITY_DN108_c0_g1;TRINITY_DN121_c1_g2;TRINITY_DN121_c1_g1;TRINITY_DN121_c0_g1;TRINITY_DN181_c0_g1;TRINITY_DN178_c0_g2;TRINITY_DN156_c1_g1;TRINITY_DN191_c0_g2;TRINITY_DN249_c0_g1;TRINITY_DN214_c0_g1;TRINITY_DN258_c3_g1;TRINITY_DN237_c0_g4;TRINITY_DN237_c0_g2;TRINIT…
microtubule	cellular_component	GO:0005874	676	TRINITY_DN54_c0_g1;TRINITY_DN50_c3_g1;TRINITY_DN40_c0_g1;TRINITY_DN122_c1_g1;TRINITY_DN129_c0_g1;TRINITY_DN121_c1_g1;TRINITY_DN181_c0_g1;TRINITY_DN187_c0_g1;TRINITY_DN100_c1_g1;TRINITY_DN297_c0_g1;TRINITY_DN281_c1_g1;TRINITY_DN286_c0_g2;TRINITY_DN378_c2_g1;TRINITY_DN373_c0_g1;TRINITY_DN356_c0_g3;TRINITY_DN405_c1_g1;TRINITY_DN404_c2_g1;TRINITY_DN414_c1_g1;TRINITY_DN485_c0_g1;TRINITY_DN447_c0_g1;TR…
multicellular organism development	biological_process	GO:0007275	669	TRINITY_DN17_c0_g1;TRINITY_DN74_c2_g1;TRINITY_DN41_c0_g2;TRINITY_DN33_c3_g2;TRINITY_DN103_c0_g1;TRINITY_DN178_c1_g1;TRINITY_DN219_c1_g2;TRINITY_DN214_c0_g1;TRINITY_DN246_c0_g1;TRINITY_DN230_c1_g5;TRINITY_DN230_c0_g1;TRINITY_DN250_c2_g2;TRINITY_DN276_c0_g1;TRINITY_DN272_c0_g1;TRINITY_DN301_c1_g1;TRINITY_DN367_c1_g1;TRINITY_DN381_c1_g1;TRINITY_DN354_c1_g1;TRINITY_DN306_c5_g1;TRINITY_DN332_c1_g3;TRI…
transcription from RNA polymerase II promoter	biological_process	GO:0006366	664	TRINITY_DN73_c1_g1;TRINITY_DN55_c3_g2;TRINITY_DN37_c0_g1;TRINITY_DN21_c1_g1;TRINITY_DN71_c0_g1;TRINITY_DN44_c0_g1;TRINITY_DN13_c2_g2;TRINITY_DN13_c2_g1;TRINITY_DN11_c0_g1;TRINITY_DN103_c0_g1;TRINITY_DN177_c0_g1;TRINITY_DN177_c0_g2;TRINITY_DN195_c1_g1;TRINITY_DN165_c1_g3;TRINITY_DN165_c1_g2;TRINITY_DN165_c1_g4;TRINITY_DN110_c4_g1;TRINITY_DN121_c0_g1;TRINITY_DN178_c1_g1;TRINITY_DN242_c0_g1;TRINITY_…
neuronal cell body	cellular_component	GO:0043025	660	TRINITY_DN89_c2_g1;TRINITY_DN10_c1_g1;TRINITY_DN3_c0_g1;TRINITY_DN98_c1_g1;TRINITY_DN28_c0_g3;TRINITY_DN48_c1_g1;TRINITY_DN125_c2_g1;TRINITY_DN175_c0_g1;TRINITY_DN189_c1_g1;TRINITY_DN124_c0_g1;TRINITY_DN121_c0_g1;TRINITY_DN156_c1_g2;TRINITY_DN200_c4_g1;TRINITY_DN270_c0_g1;TRINITY_DN263_c2_g1;TRINITY_DN204_c1_g1;TRINITY_DN234_c0_g2;TRINITY_DN231_c1_g1;TRINITY_DN277_c0_g1;TRINITY_DN277_c0_g2;TRINIT…
protein ubiquitination involved in ubiquitin-dependent protein catabolic process	biological_process	GO:0042787	659	TRINITY_DN55_c8_g1;TRINITY_DN192_c1_g4;TRINITY_DN105_c5_g1;TRINITY_DN133_c1_g1;TRINITY_DN194_c0_g2;TRINITY_DN186_c3_g1;TRINITY_DN242_c4_g1;TRINITY_DN244_c0_g2;TRINITY_DN222_c0_g1;TRINITY_DN222_c0_g2;TRINITY_DN257_c1_g1;TRINITY_DN264_c0_g1;TRINITY_DN352_c0_g2;TRINITY_DN381_c1_g4;TRINITY_DN348_c4_g1;TRINITY_DN333_c0_g1;TRINITY_DN344_c0_g1;TRINITY_DN426_c0_g4;TRINITY_DN452_c3_g1;TRINITY_DN405_c1_g1;…
response to drug	biological_process	GO:0042493	658	TRINITY_DN74_c0_g3;TRINITY_DN38_c1_g1;TRINITY_DN8_c1_g1;TRINITY_DN29_c3_g1;TRINITY_DN22_c0_g5;TRINITY_DN88_c0_g1;TRINITY_DN13_c0_g2;TRINITY_DN28_c0_g3;TRINITY_DN125_c1_g1;TRINITY_DN184_c1_g1;TRINITY_DN123_c0_g1;TRINITY_DN189_c1_g1;TRINITY_DN195_c0_g1;TRINITY_DN110_c4_g1;TRINITY_DN157_c0_g1;TRINITY_DN156_c3_g1;TRINITY_DN271_c0_g3;TRINITY_DN240_c0_g1;TRINITY_DN240_c2_g1;TRINITY_DN264_c0_g1;TRINITY_…
regulation of transcription from RNA polymerase II promoter	biological_process	GO:0006357	656	TRINITY_DN46_c3_g1;TRINITY_DN55_c0_g1;TRINITY_DN89_c0_g2;TRINITY_DN21_c1_g1;TRINITY_DN10_c3_g1;TRINITY_DN43_c0_g1;TRINITY_DN0_c3_g1;TRINITY_DN177_c0_g1;TRINITY_DN177_c0_g2;TRINITY_DN125_c1_g1;TRINITY_DN184_c2_g1;TRINITY_DN115_c0_g2;TRINITY_DN110_c4_g1;TRINITY_DN110_c1_g3;TRINITY_DN110_c1_g2;TRINITY_DN110_c1_g1;TRINITY_DN187_c0_g1;TRINITY_DN135_c0_g1;TRINITY_DN219_c2_g1;TRINITY_DN238_c0_g1;TRINITY…
transmembrane transport	biological_process	GO:0055085	654	TRINITY_DN85_c4_g1;TRINITY_DN83_c1_g1;TRINITY_DN63_c0_g1;TRINITY_DN88_c2_g1;TRINITY_DN87_c0_g4;TRINITY_DN87_c0_g1;TRINITY_DN106_c0_g1;TRINITY_DN183_c0_g2;TRINITY_DN134_c1_g1;TRINITY_DN146_c0_g1;TRINITY_DN258_c7_g1;TRINITY_DN200_c0_g1;TRINITY_DN271_c1_g1;TRINITY_DN225_c0_g1;TRINITY_DN233_c1_g1;TRINITY_DN241_c2_g1;TRINITY_DN330_c0_g1;TRINITY_DN322_c1_g1;TRINITY_DN392_c1_g1;TRINITY_DN372_c1_g1;TRINI…
translation	biological_process	GO:0006412	653	TRINITY_DN46_c0_g1;TRINITY_DN46_c0_g2;TRINITY_DN0_c5_g1;TRINITY_DN34_c0_g1;TRINITY_DN31_c1_g1;TRINITY_DN125_c0_g1;TRINITY_DN183_c0_g2;TRINITY_DN158_c0_g1;TRINITY_DN186_c1_g1;TRINITY_DN168_c2_g1;TRINITY_DN228_c0_g2;TRINITY_DN228_c0_g3;TRINITY_DN267_c1_g1;TRINITY_DN251_c1_g3;TRINITY_DN275_c0_g1;TRINITY_DN288_c1_g1;TRINITY_DN380_c1_g2;TRINITY_DN300_c0_g1;TRINITY_DN350_c1_g2;TRINITY_DN493_c1_g1;TRINI…
ubiquitin protein ligase activity	molecular_function	GO:0061630	644	TRINITY_DN77_c0_g1;TRINITY_DN55_c3_g1;TRINITY_DN55_c8_g1;TRINITY_DN21_c0_g1;TRINITY_DN22_c1_g2;TRINITY_DN62_c0_g1;TRINITY_DN45_c0_g1;TRINITY_DN192_c1_g4;TRINITY_DN133_c1_g1;TRINITY_DN194_c0_g2;TRINITY_DN186_c3_g1;TRINITY_DN178_c1_g1;TRINITY_DN242_c4_g1;TRINITY_DN244_c0_g2;TRINITY_DN222_c0_g1;TRINITY_DN257_c1_g1;TRINITY_DN264_c0_g1;TRINITY_DN381_c1_g4;TRINITY_DN338_c3_g1;TRINITY_DN344_c0_g1;TRINIT…
DNA repair	biological_process	GO:0006281	635	TRINITY_DN4_c0_g1;TRINITY_DN55_c3_g2;TRINITY_DN55_c2_g2;TRINITY_DN38_c1_g1;TRINITY_DN31_c0_g1;TRINITY_DN14_c0_g1;TRINITY_DN143_c0_g1;TRINITY_DN152_c0_g1;TRINITY_DN165_c1_g2;TRINITY_DN145_c1_g1;TRINITY_DN187_c0_g1;TRINITY_DN136_c0_g1;TRINITY_DN267_c0_g1;TRINITY_DN245_c3_g1;TRINITY_DN288_c1_g1;TRINITY_DN222_c0_g1;TRINITY_DN222_c0_g2;TRINITY_DN366_c0_g1;TRINITY_DN352_c3_g1;TRINITY_DN378_c1_g1;TRINIT…
ubiquitin-protein transferase activity	molecular_function	GO:0004842	619	TRINITY_DN85_c0_g1;TRINITY_DN21_c2_g1;TRINITY_DN22_c1_g2;TRINITY_DN45_c0_g1;TRINITY_DN48_c0_g1;TRINITY_DN192_c1_g4;TRINITY_DN105_c5_g1;TRINITY_DN111_c2_g1;TRINITY_DN145_c0_g1;TRINITY_DN145_c1_g1;TRINITY_DN222_c0_g1;TRINITY_DN222_c0_g2;TRINITY_DN257_c1_g1;TRINITY_DN264_c0_g1;TRINITY_DN264_c2_g2;TRINITY_DN346_c1_g1;TRINITY_DN332_c1_g1;TRINITY_DN338_c3_g1;TRINITY_DN348_c4_g1;TRINITY_DN333_c0_g1;TRIN…
protein kinase binding	molecular_function	GO:0019901	606	TRINITY_DN70_c0_g2;TRINITY_DN21_c1_g1;TRINITY_DN1_c0_g1;TRINITY_DN49_c4_g1;TRINITY_DN49_c2_g1;TRINITY_DN96_c0_g1;TRINITY_DN122_c1_g1;TRINITY_DN181_c0_g1;TRINITY_DN135_c0_g1;TRINITY_DN214_c0_g1;TRINITY_DN270_c0_g1;TRINITY_DN205_c1_g1;TRINITY_DN233_c0_g1;TRINITY_DN354_c6_g1;TRINITY_DN319_c0_g1;TRINITY_DN373_c0_g1;TRINITY_DN348_c0_g2;TRINITY_DN333_c0_g1;TRINITY_DN403_c0_g1;TRINITY_DN447_c0_g1;TRINIT…
mitochondrial inner membrane	cellular_component	GO:0005743	604	TRINITY_DN34_c0_g1;TRINITY_DN166_c0_g2;TRINITY_DN123_c0_g1;TRINITY_DN123_c3_g1;TRINITY_DN183_c0_g2;TRINITY_DN134_c2_g1;TRINITY_DN168_c2_g1;TRINITY_DN191_c4_g1;TRINITY_DN223_c0_g2;TRINITY_DN297_c2_g1;TRINITY_DN275_c0_g1;TRINITY_DN288_c1_g1;TRINITY_DN261_c1_g1;TRINITY_DN241_c2_g1;TRINITY_DN380_c1_g2;TRINITY_DN335_c0_g1;TRINITY_DN317_c0_g1;TRINITY_DN302_c0_g1;TRINITY_DN336_c0_g1;TRINITY_DN306_c0_g2;…
cell cortex	cellular_component	GO:0005938	599	TRINITY_DN17_c0_g1;TRINITY_DN55_c8_g1;TRINITY_DN3_c0_g1;TRINITY_DN66_c0_g1;TRINITY_DN1_c3_g1;TRINITY_DN1_c3_g2;TRINITY_DN159_c0_g1;TRINITY_DN108_c2_g1;TRINITY_DN194_c0_g2;TRINITY_DN186_c3_g1;TRINITY_DN121_c1_g2;TRINITY_DN121_c1_g1;TRINITY_DN242_c4_g1;TRINITY_DN284_c0_g1;TRINITY_DN381_c1_g4;TRINITY_DN389_c0_g1;TRINITY_DN344_c0_g1;TRINITY_DN426_c0_g4;TRINITY_DN514_c0_g4;TRINITY_DN546_c1_g2;TRINITY_…
structural constituent of ribosome	molecular_function	GO:0003735	597	TRINITY_DN0_c5_g1;TRINITY_DN23_c1_g1;TRINITY_DN143_c0_g1;TRINITY_DN125_c0_g1;TRINITY_DN183_c0_g2;TRINITY_DN199_c0_g1;TRINITY_DN158_c0_g1;TRINITY_DN168_c2_g1;TRINITY_DN228_c0_g2;TRINITY_DN228_c0_g3;TRINITY_DN267_c1_g1;TRINITY_DN275_c0_g1;TRINITY_DN288_c1_g1;TRINITY_DN380_c1_g2;TRINITY_DN352_c0_g1;TRINITY_DN392_c1_g2;TRINITY_DN350_c1_g2;TRINITY_DN493_c1_g1;TRINITY_DN472_c0_g3;TRINITY_DN432_c0_g1;TR…
magnesium ion binding	molecular_function	GO:0000287	594	TRINITY_DN5_c0_g2;TRINITY_DN120_c2_g1;TRINITY_DN196_c0_g1;TRINITY_DN196_c0_g2;TRINITY_DN165_c0_g1;TRINITY_DN171_c0_g1;TRINITY_DN242_c2_g1;TRINITY_DN271_c1_g1;TRINITY_DN261_c0_g1;TRINITY_DN387_c4_g1;TRINITY_DN309_c0_g1;TRINITY_DN348_c0_g1;TRINITY_DN348_c0_g2;TRINITY_DN362_c0_g1;TRINITY_DN452_c0_g1;TRINITY_DN538_c1_g1;TRINITY_DN582_c0_g4;TRINITY_DN566_c0_g3;TRINITY_DN663_c12_g1;TRINITY_DN643_c1_g1;…
dendrite	cellular_component	GO:0030425	593	TRINITY_DN3_c0_g1;TRINITY_DN98_c1_g1;TRINITY_DN143_c0_g1;TRINITY_DN184_c2_g1;TRINITY_DN189_c1_g1;TRINITY_DN124_c0_g1;TRINITY_DN172_c0_g1;TRINITY_DN182_c0_g1;TRINITY_DN249_c0_g1;TRINITY_DN254_c0_g1;TRINITY_DN200_c0_g1;TRINITY_DN263_c2_g1;TRINITY_DN204_c1_g1;TRINITY_DN234_c1_g1;TRINITY_DN234_c0_g2;TRINITY_DN231_c1_g1;TRINITY_DN299_c0_g1;TRINITY_DN277_c0_g2;TRINITY_DN319_c1_g2;TRINITY_DN373_c0_g1;TR…
negative regulation of cell proliferation	biological_process	GO:0008285	589	TRINITY_DN46_c3_g1;TRINITY_DN97_c4_g1;TRINITY_DN10_c0_g1;TRINITY_DN10_c0_g2;TRINITY_DN86_c3_g2;TRINITY_DN8_c1_g1;TRINITY_DN62_c2_g1;TRINITY_DN13_c2_g2;TRINITY_DN13_c2_g1;TRINITY_DN11_c0_g1;TRINITY_DN96_c0_g1;TRINITY_DN28_c0_g3;TRINITY_DN48_c1_g1;TRINITY_DN153_c1_g1;TRINITY_DN115_c0_g1;TRINITY_DN111_c12_g1;TRINITY_DN140_c0_g1;TRINITY_DN140_c0_g2;TRINITY_DN110_c4_g1;TRINITY_DN114_c1_g1;TRINITY_DN15…
axon guidance	biological_process	GO:0007411	587	TRINITY_DN54_c0_g1;TRINITY_DN97_c3_g1;TRINITY_DN86_c2_g1;TRINITY_DN86_c3_g1;TRINITY_DN86_c3_g3;TRINITY_DN86_c3_g2;TRINITY_DN86_c1_g1;TRINITY_DN56_c2_g2;TRINITY_DN143_c0_g1;TRINITY_DN122_c1_g1;TRINITY_DN110_c4_g1;TRINITY_DN172_c1_g2;TRINITY_DN191_c0_g2;TRINITY_DN268_c0_g1;TRINITY_DN297_c0_g1;TRINITY_DN276_c0_g2;TRINITY_DN261_c0_g1;TRINITY_DN252_c0_g2;TRINITY_DN221_c0_g1;TRINITY_DN217_c0_g3;TRINITY…
spermatogenesis	biological_process	GO:0007283	582	TRINITY_DN17_c0_g1;TRINITY_DN74_c0_g1;TRINITY_DN0_c13_g1;TRINITY_DN11_c0_g1;TRINITY_DN28_c0_g3;TRINITY_DN90_c0_g1;TRINITY_DN90_c0_g2;TRINITY_DN125_c1_g1;TRINITY_DN105_c5_g1;TRINITY_DN189_c0_g1;TRINITY_DN195_c0_g1;TRINITY_DN111_c12_g1;TRINITY_DN176_c3_g1;TRINITY_DN259_c1_g1;TRINITY_DN216_c1_g1;TRINITY_DN230_c1_g5;TRINITY_DN230_c0_g1;TRINITY_DN291_c0_g1;TRINITY_DN263_c2_g1;TRINITY_DN235_c0_g4;TRINI…
cellular response to DNA damage stimulus	biological_process	GO:0006974	572	TRINITY_DN55_c2_g2;TRINITY_DN35_c0_g1;TRINITY_DN45_c0_g1;TRINITY_DN145_c0_g1;TRINITY_DN187_c0_g1;TRINITY_DN248_c0_g1;TRINITY_DN248_c0_g2;TRINITY_DN255_c8_g1;TRINITY_DN245_c3_g1;TRINITY_DN222_c0_g1;TRINITY_DN222_c0_g2;TRINITY_DN217_c0_g1;TRINITY_DN283_c0_g1;TRINITY_DN322_c7_g1;TRINITY_DN493_c2_g1;TRINITY_DN452_c0_g1;TRINITY_DN494_c9_g1;TRINITY_DN494_c2_g2;TRINITY_DN414_c0_g1;TRINITY_DN439_c1_g1;TR…
DNA integration	biological_process	GO:0015074	558	TRINITY_DN1_c2_g1;TRINITY_DN1_c6_g1;TRINITY_DN150_c0_g1;TRINITY_DN420_c3_g1;TRINITY_DN479_c4_g1;TRINITY_DN479_c1_g1;TRINITY_DN479_c6_g1;TRINITY_DN742_c3_g2;TRINITY_DN771_c5_g1;TRINITY_DN706_c0_g1;TRINITY_DN889_c1_g2;TRINITY_DN800_c3_g1;TRINITY_DN800_c3_g2;TRINITY_DN800_c1_g1;TRINITY_DN1130_c6_g1;TRINITY_DN1489_c3_g3;TRINITY_DN1489_c3_g4;TRINITY_DN1506_c2_g2;TRINITY_DN1617_c6_g1;TRINITY_DN1617_c8_…
viral process	biological_process	GO:0016032	555	TRINITY_DN85_c1_g1;TRINITY_DN4_c0_g1;TRINITY_DN55_c3_g2;TRINITY_DN37_c0_g1;TRINITY_DN50_c5_g1;TRINITY_DN1_c1_g1;TRINITY_DN134_c1_g1;TRINITY_DN165_c1_g2;TRINITY_DN110_c1_g3;TRINITY_DN110_c1_g2;TRINITY_DN110_c1_g1;TRINITY_DN238_c0_g1;TRINITY_DN244_c5_g1;TRINITY_DN244_c3_g1;TRINITY_DN264_c0_g1;TRINITY_DN233_c0_g1;TRINITY_DN330_c0_g1;TRINITY_DN378_c1_g1;TRINITY_DN310_c0_g1;TRINITY_DN306_c1_g1;TRINITY…
immune response	biological_process	GO:0006955	550	TRINITY_DN173_c0_g1;TRINITY_DN267_c3_g1;TRINITY_DN330_c0_g1;TRINITY_DN306_c1_g2;TRINITY_DN365_c0_g2;TRINITY_DN348_c4_g1;TRINITY_DN452_c3_g1;TRINITY_DN455_c2_g1;TRINITY_DN546_c0_g1;TRINITY_DN501_c0_g1;TRINITY_DN510_c1_g1;TRINITY_DN548_c2_g1;TRINITY_DN661_c2_g1;TRINITY_DN770_c0_g1;TRINITY_DN800_c0_g2;TRINITY_DN909_c0_g4;TRINITY_DN949_c1_g1;TRINITY_DN1044_c0_g1;TRINITY_DN1024_c1_g1;TRINITY_DN1189_c3…
RNA-DNA hybrid ribonuclease activity	molecular_function	GO:0004523	547	TRINITY_DN1_c2_g1;TRINITY_DN1_c6_g1;TRINITY_DN150_c0_g1;TRINITY_DN420_c3_g1;TRINITY_DN479_c4_g1;TRINITY_DN479_c1_g1;TRINITY_DN479_c6_g1;TRINITY_DN742_c3_g2;TRINITY_DN771_c5_g1;TRINITY_DN889_c1_g2;TRINITY_DN800_c3_g1;TRINITY_DN800_c3_g2;TRINITY_DN800_c1_g1;TRINITY_DN1130_c6_g1;TRINITY_DN1195_c0_g1;TRINITY_DN1150_c1_g3;TRINITY_DN1489_c3_g3;TRINITY_DN1489_c3_g4;TRINITY_DN1506_c2_g2;TRINITY_DN1617_c6…
nucleic acid binding	molecular_function	GO:0003676	539	TRINITY_DN6_c0_g1;TRINITY_DN150_c0_g1;TRINITY_DN105_c0_g1;TRINITY_DN134_c0_g1;TRINITY_DN244_c5_g1;TRINITY_DN316_c2_g1;TRINITY_DN332_c0_g1;TRINITY_DN325_c0_g1;TRINITY_DN426_c1_g1;TRINITY_DN426_c2_g1;TRINITY_DN466_c0_g1;TRINITY_DN420_c3_g1;TRINITY_DN479_c4_g1;TRINITY_DN479_c6_g1;TRINITY_DN476_c0_g1;TRINITY_DN551_c0_g1;TRINITY_DN590_c0_g1;TRINITY_DN506_c1_g1;TRINITY_DN541_c2_g1;TRINITY_DN515_c0_g1;T…
GTPase activator activity	molecular_function	GO:0005096	539	TRINITY_DN92_c2_g1;TRINITY_DN97_c2_g1;TRINITY_DN22_c0_g3;TRINITY_DN108_c0_g1;TRINITY_DN121_c1_g2;TRINITY_DN121_c1_g1;TRINITY_DN181_c0_g1;TRINITY_DN178_c0_g2;TRINITY_DN214_c0_g1;TRINITY_DN258_c3_g1;TRINITY_DN251_c0_g1;TRINITY_DN237_c0_g4;TRINITY_DN237_c0_g2;TRINITY_DN237_c0_g3;TRINITY_DN263_c0_g1;TRINITY_DN262_c0_g1;TRINITY_DN262_c0_g2;TRINITY_DN281_c0_g1;TRINITY_DN220_c16_g1;TRINITY_DN303_c0_g1;T…
neuron projection development	biological_process	GO:0031175	537	TRINITY_DN55_c8_g1;TRINITY_DN86_c3_g4;TRINITY_DN29_c5_g1;TRINITY_DN25_c0_g1;TRINITY_DN148_c0_g1;TRINITY_DN194_c0_g2;TRINITY_DN114_c0_g1;TRINITY_DN186_c3_g1;TRINITY_DN242_c4_g1;TRINITY_DN270_c0_g1;TRINITY_DN221_c0_g1;TRINITY_DN253_c0_g1;TRINITY_DN367_c0_g1;TRINITY_DN381_c1_g4;TRINITY_DN321_c0_g1;TRINITY_DN365_c0_g1;TRINITY_DN315_c2_g1;TRINITY_DN344_c0_g1;TRINITY_DN426_c0_g4;TRINITY_DN481_c1_g4;TRI…
positive regulation of apoptotic process	biological_process	GO:0043065	518	TRINITY_DN71_c0_g1;TRINITY_DN29_c5_g1;TRINITY_DN180_c1_g1;TRINITY_DN157_c0_g1;TRINITY_DN156_c1_g2;TRINITY_DN249_c0_g1;TRINITY_DN219_c1_g1;TRINITY_DN230_c5_g1;TRINITY_DN252_c0_g2;TRINITY_DN264_c1_g1;TRINITY_DN229_c0_g1;TRINITY_DN220_c2_g1;TRINITY_DN220_c16_g1;TRINITY_DN277_c0_g2;TRINITY_DN352_c4_g1;TRINITY_DN302_c0_g1;TRINITY_DN378_c10_g1;TRINITY_DN333_c0_g1;TRINITY_DN477_c0_g3;TRINITY_DN438_c1_g1…
enzyme binding	molecular_function	GO:0019899	518	TRINITY_DN85_c5_g1;TRINITY_DN93_c0_g1;TRINITY_DN93_c4_g1;TRINITY_DN21_c1_g1;TRINITY_DN56_c0_g1;TRINITY_DN76_c0_g2;TRINITY_DN11_c3_g1;TRINITY_DN126_c1_g1;TRINITY_DN111_c12_g1;TRINITY_DN151_c0_g2;TRINITY_DN151_c0_g1;TRINITY_DN156_c3_g1;TRINITY_DN219_c1_g1;TRINITY_DN243_c0_g1;TRINITY_DN238_c0_g1;TRINITY_DN254_c1_g1;TRINITY_DN221_c0_g1;TRINITY_DN299_c0_g1;TRINITY_DN264_c0_g1;TRINITY_DN387_c0_g1;TRINI…
apical plasma membrane	cellular_component	GO:0016324	517	TRINITY_DN21_c3_g1;TRINITY_DN20_c0_g2;TRINITY_DN29_c3_g1;TRINITY_DN11_c1_g1;TRINITY_DN189_c1_g1;TRINITY_DN124_c0_g2;TRINITY_DN157_c0_g1;TRINITY_DN191_c1_g1;TRINITY_DN271_c0_g2;TRINITY_DN291_c0_g1;TRINITY_DN231_c1_g1;TRINITY_DN380_c1_g1;TRINITY_DN378_c0_g1;TRINITY_DN315_c0_g2;TRINITY_DN372_c1_g1;TRINITY_DN452_c1_g1;TRINITY_DN496_c1_g1;TRINITY_DN406_c0_g1;TRINITY_DN546_c3_g1;TRINITY_DN581_c0_g1;TRI…
lysosomal membrane	cellular_component	GO:0005765	505	TRINITY_DN21_c0_g1;TRINITY_DN97_c0_g1;TRINITY_DN83_c0_g1;TRINITY_DN78_c12_g1;TRINITY_DN38_c1_g1;TRINITY_DN98_c1_g1;TRINITY_DN61_c4_g1;TRINITY_DN22_c0_g1;TRINITY_DN94_c0_g1;TRINITY_DN11_c1_g1;TRINITY_DN87_c0_g4;TRINITY_DN87_c0_g1;TRINITY_DN87_c0_g2;TRINITY_DN144_c0_g1;TRINITY_DN145_c0_g1;TRINITY_DN146_c0_g1;TRINITY_DN182_c0_g1;TRINITY_DN265_c2_g1;TRINITY_DN217_c1_g1;TRINITY_DN346_c1_g1;TRINITY_DN3…
in utero embryonic development	biological_process	GO:0001701	502	TRINITY_DN17_c0_g3;TRINITY_DN92_c0_g1;TRINITY_DN21_c0_g2;TRINITY_DN27_c0_g1;TRINITY_DN50_c0_g1;TRINITY_DN86_c3_g1;TRINITY_DN86_c3_g3;TRINITY_DN86_c3_g4;TRINITY_DN8_c1_g1;TRINITY_DN22_c0_g5;TRINITY_DN45_c1_g1;TRINITY_DN49_c2_g1;TRINITY_DN11_c0_g1;TRINITY_DN99_c0_g4;TRINITY_DN14_c0_g1;TRINITY_DN143_c0_g1;TRINITY_DN128_c4_g1;TRINITY_DN125_c3_g1;TRINITY_DN125_c3_g2;TRINITY_DN165_c1_g4;TRINITY_DN110_c…
cellular protein metabolic process	biological_process	GO:0044267	498	TRINITY_DN52_c0_g1;TRINITY_DN39_c1_g1;TRINITY_DN74_c0_g1;TRINITY_DN50_c1_g1;TRINITY_DN31_c0_g1;TRINITY_DN31_c1_g1;TRINITY_DN75_c0_g1;TRINITY_DN167_c1_g1;TRINITY_DN115_c1_g3;TRINITY_DN134_c1_g1;TRINITY_DN186_c1_g1;TRINITY_DN279_c0_g2;TRINITY_DN223_c2_g1;TRINITY_DN202_c0_g1;TRINITY_DN267_c2_g4;TRINITY_DN200_c0_g1;TRINITY_DN251_c1_g3;TRINITY_DN203_c1_g1;TRINITY_DN352_c3_g1;TRINITY_DN330_c0_g1;TRINIT…
microvillus	cellular_component	GO:0005902	496	TRINITY_DN55_c8_g1;TRINITY_DN103_c1_g1;TRINITY_DN194_c0_g2;TRINITY_DN186_c3_g1;TRINITY_DN242_c4_g1;TRINITY_DN381_c1_g4;TRINITY_DN315_c0_g2;TRINITY_DN348_c4_g1;TRINITY_DN344_c0_g1;TRINITY_DN426_c0_g4;TRINITY_DN452_c3_g1;TRINITY_DN451_c2_g3;TRINITY_DN458_c2_g1;TRINITY_DN514_c0_g4;TRINITY_DN510_c1_g1;TRINITY_DN596_c1_g1;TRINITY_DN587_c0_g1;TRINITY_DN586_c0_g4;TRINITY_DN598_c2_g1;TRINITY_DN661_c2_g1;…
protein heterodimerization activity	molecular_function	GO:0046982	494	TRINITY_DN21_c1_g1;TRINITY_DN29_c1_g1;TRINITY_DN49_c1_g1;TRINITY_DN31_c0_g1;TRINITY_DN75_c1_g2;TRINITY_DN11_c0_g1;TRINITY_DN67_c0_g1;TRINITY_DN196_c0_g2;TRINITY_DN138_c0_g1;TRINITY_DN115_c1_g3;TRINITY_DN189_c1_g1;TRINITY_DN156_c1_g2;TRINITY_DN156_c2_g1;TRINITY_DN238_c0_g1;TRINITY_DN200_c0_g1;TRINITY_DN265_c0_g1;TRINITY_DN265_c0_g2;TRINITY_DN204_c0_g1;TRINITY_DN234_c1_g1;TRINITY_DN289_c3_g2;TRINIT…
ubiquitin ligase complex	cellular_component	GO:0000151	488	TRINITY_DN55_c8_g1;TRINITY_DN62_c0_g1;TRINITY_DN45_c0_g1;TRINITY_DN48_c0_g1;TRINITY_DN192_c1_g4;TRINITY_DN194_c0_g2;TRINITY_DN186_c3_g1;TRINITY_DN178_c1_g1;TRINITY_DN242_c4_g1;TRINITY_DN203_c1_g1;TRINITY_DN381_c1_g4;TRINITY_DN344_c0_g1;TRINITY_DN426_c0_g4;TRINITY_DN405_c1_g1;TRINITY_DN428_c3_g1;TRINITY_DN585_c1_g1;TRINITY_DN586_c0_g4;TRINITY_DN598_c2_g1;TRINITY_DN601_c0_g1;TRINITY_DN661_c1_g1;TRI…
mitotic nuclear division	biological_process	GO:0007067	487	TRINITY_DN3_c0_g1;TRINITY_DN40_c0_g1;TRINITY_DN0_c28_g2;TRINITY_DN1_c0_g1;TRINITY_DN31_c0_g1;TRINITY_DN183_c0_g2;TRINITY_DN108_c2_g1;TRINITY_DN149_c0_g1;TRINITY_DN149_c0_g2;TRINITY_DN121_c1_g1;TRINITY_DN227_c0_g1;TRINITY_DN288_c1_g1;TRINITY_DN218_c0_g1;TRINITY_DN281_c1_g1;TRINITY_DN352_c3_g1;TRINITY_DN387_c2_g1;TRINITY_DN330_c0_g1;TRINITY_DN367_c3_g1;TRINITY_DN436_c0_g1;TRINITY_DN404_c2_g1;TRINIT…
axon	cellular_component	GO:0030424	483	TRINITY_DN69_c2_g1;TRINITY_DN49_c2_g1;TRINITY_DN144_c0_g1;TRINITY_DN124_c0_g1;TRINITY_DN181_c0_g1;TRINITY_DN214_c0_g1;TRINITY_DN271_c0_g3;TRINITY_DN234_c1_g1;TRINITY_DN234_c0_g2;TRINITY_DN327_c1_g1;TRINITY_DN365_c0_g1;TRINITY_DN373_c0_g1;TRINITY_DN315_c2_g1;TRINITY_DN362_c0_g1;TRINITY_DN379_c2_g2;TRINITY_DN494_c2_g2;TRINITY_DN415_c2_g2;TRINITY_DN486_c1_g1;TRINITY_DN519_c0_g1;TRINITY_DN514_c0_g4;T…
RNA polymerase II core promoter proximal region sequence-specific DNA binding	molecular_function	GO:0000978	473	TRINITY_DN42_c0_g2;TRINITY_DN45_c1_g1;TRINITY_DN75_c1_g2;TRINITY_DN11_c0_g1;TRINITY_DN103_c0_g1;TRINITY_DN189_c0_g1;TRINITY_DN121_c0_g1;TRINITY_DN178_c1_g1;TRINITY_DN135_c0_g1;TRINITY_DN206_c0_g1;TRINITY_DN259_c0_g6;TRINITY_DN230_c2_g2;TRINITY_DN230_c1_g5;TRINITY_DN265_c0_g1;TRINITY_DN265_c0_g2;TRINITY_DN220_c2_g1;TRINITY_DN396_c0_g1;TRINITY_DN346_c0_g2;TRINITY_DN347_c1_g1;TRINITY_DN354_c0_g2;TRI…
chromatin	cellular_component	GO:0000785	473	TRINITY_DN55_c2_g2;TRINITY_DN55_c8_g1;TRINITY_DN31_c0_g1;TRINITY_DN14_c0_g1;TRINITY_DN194_c0_g2;TRINITY_DN186_c3_g1;TRINITY_DN178_c1_g1;TRINITY_DN279_c1_g1;TRINITY_DN242_c4_g1;TRINITY_DN255_c8_g1;TRINITY_DN251_c2_g1;TRINITY_DN377_c0_g1;TRINITY_DN352_c3_g1;TRINITY_DN329_c0_g1;TRINITY_DN381_c1_g4;TRINITY_DN326_c1_g3;TRINITY_DN326_c1_g1;TRINITY_DN344_c0_g1;TRINITY_DN426_c0_g4;TRINITY_DN502_c0_g1;TRI…
positive regulation of gene expression	biological_process	GO:0010628	472	TRINITY_DN85_c2_g1;TRINITY_DN83_c1_g1;TRINITY_DN5_c0_g2;TRINITY_DN86_c1_g1;TRINITY_DN45_c0_g1;TRINITY_DN49_c2_g1;TRINITY_DN11_c0_g1;TRINITY_DN33_c3_g2;TRINITY_DN125_c3_g1;TRINITY_DN125_c3_g2;TRINITY_DN125_c1_g1;TRINITY_DN152_c0_g2;TRINITY_DN195_c0_g1;TRINITY_DN151_c2_g3;TRINITY_DN110_c4_g1;TRINITY_DN181_c0_g1;TRINITY_DN178_c1_g1;TRINITY_DN263_c2_g1;TRINITY_DN264_c0_g1;TRINITY_DN277_c0_g1;TRINITY_…
GTPase activity	molecular_function	GO:0003924	469	TRINITY_DN97_c2_g1;TRINITY_DN22_c0_g5;TRINITY_DN22_c0_g1;TRINITY_DN22_c0_g2;TRINITY_DN22_c0_g3;TRINITY_DN88_c0_g1;TRINITY_DN34_c0_g1;TRINITY_DN1_c1_g1;TRINITY_DN75_c0_g1;TRINITY_DN122_c1_g1;TRINITY_DN173_c0_g1;TRINITY_DN173_c6_g1;TRINITY_DN124_c0_g1;TRINITY_DN186_c1_g1;TRINITY_DN135_c0_g1;TRINITY_DN258_c2_g1;TRINITY_DN200_c1_g1;TRINITY_DN251_c9_g1;TRINITY_DN275_c1_g2;TRINITY_DN203_c0_g3;TRINITY_D…
nuclear membrane	cellular_component	GO:0031965	468	TRINITY_DN35_c0_g1;TRINITY_DN74_c0_g1;TRINITY_DN74_c0_g3;TRINITY_DN22_c0_g3;TRINITY_DN112_c1_g2;TRINITY_DN112_c1_g1;TRINITY_DN125_c0_g1;TRINITY_DN183_c0_g1;TRINITY_DN134_c1_g1;TRINITY_DN119_c0_g1;TRINITY_DN182_c0_g1;TRINITY_DN197_c1_g1;TRINITY_DN206_c1_g1;TRINITY_DN330_c0_g1;TRINITY_DN399_c0_g1;TRINITY_DN326_c1_g3;TRINITY_DN326_c1_g1;TRINITY_DN300_c0_g1;TRINITY_DN474_c0_g1;TRINITY_DN485_c1_g1;TRI…
nucleic acid phosphodiester bond hydrolysis	biological_process	GO:0090305	466	TRINITY_DN38_c1_g1;TRINITY_DN1_c10_g1;TRINITY_DN252_c0_g1;TRINITY_DN489_c4_g1;TRINITY_DN400_c0_g1;TRINITY_DN593_c4_g1;TRINITY_DN695_c0_g1;TRINITY_DN751_c1_g2;TRINITY_DN743_c2_g1;TRINITY_DN875_c1_g1;TRINITY_DN1172_c0_g1;TRINITY_DN1136_c0_g1;TRINITY_DN1136_c0_g2;TRINITY_DN1127_c0_g1;TRINITY_DN1228_c10_g1;TRINITY_DN1321_c8_g1;TRINITY_DN1553_c0_g2;TRINITY_DN1535_c0_g1;TRINITY_DN1888_c0_g1;TRINITY_DN1…
cell cycle	biological_process	GO:0007049	465	TRINITY_DN39_c1_g1;TRINITY_DN46_c3_g1;TRINITY_DN70_c0_g1;TRINITY_DN21_c0_g1;TRINITY_DN22_c0_g3;TRINITY_DN76_c0_g4;TRINITY_DN76_c0_g2;TRINITY_DN25_c0_g1;TRINITY_DN165_c1_g2;TRINITY_DN178_c2_g1;TRINITY_DN238_c0_g1;TRINITY_DN297_c8_g1;TRINITY_DN282_c0_g1;TRINITY_DN233_c0_g1;TRINITY_DN277_c0_g2;TRINITY_DN286_c0_g1;TRINITY_DN395_c1_g1;TRINITY_DN332_c1_g1;TRINITY_DN348_c0_g2;TRINITY_DN350_c0_g1;TRINITY…
protein K63-linked ubiquitination	biological_process	GO:0070534	464	TRINITY_DN55_c8_g1;TRINITY_DN133_c1_g1;TRINITY_DN194_c0_g2;TRINITY_DN186_c3_g1;TRINITY_DN242_c4_g1;TRINITY_DN257_c1_g1;TRINITY_DN381_c1_g4;TRINITY_DN338_c3_g1;TRINITY_DN348_c4_g1;TRINITY_DN344_c0_g1;TRINITY_DN426_c0_g4;TRINITY_DN452_c3_g1;TRINITY_DN510_c1_g1;TRINITY_DN586_c0_g4;TRINITY_DN598_c2_g1;TRINITY_DN661_c2_g1;TRINITY_DN779_c1_g3;TRINITY_DN711_c7_g1;TRINITY_DN764_c0_g1;TRINITY_DN723_c1_g2;…
viral entry into host cell	biological_process	GO:0046718	462	TRINITY_DN1_c2_g1;TRINITY_DN1_c6_g1;TRINITY_DN11_c1_g1;TRINITY_DN150_c0_g1;TRINITY_DN291_c0_g1;TRINITY_DN293_c0_g1;TRINITY_DN420_c3_g1;TRINITY_DN479_c4_g1;TRINITY_DN479_c1_g1;TRINITY_DN479_c6_g1;TRINITY_DN592_c0_g1;TRINITY_DN742_c3_g2;TRINITY_DN889_c1_g2;TRINITY_DN1130_c6_g1;TRINITY_DN1309_c0_g1;TRINITY_DN1489_c3_g3;TRINITY_DN1489_c3_g4;TRINITY_DN1467_c2_g1;TRINITY_DN1617_c8_g1;TRINITY_DN1777_c2_…
cell proliferation	biological_process	GO:0008283	457	TRINITY_DN70_c0_g2;TRINITY_DN70_c1_g1;TRINITY_DN98_c1_g1;TRINITY_DN22_c0_g3;TRINITY_DN40_c0_g1;TRINITY_DN11_c0_g1;TRINITY_DN193_c0_g1;TRINITY_DN183_c1_g1;TRINITY_DN165_c1_g4;TRINITY_DN168_c0_g1;TRINITY_DN245_c3_g1;TRINITY_DN260_c0_g1;TRINITY_DN204_c0_g1;TRINITY_DN222_c0_g1;TRINITY_DN222_c0_g2;TRINITY_DN203_c0_g3;TRINITY_DN312_c1_g2;TRINITY_DN312_c1_g1;TRINITY_DN346_c0_g2;TRINITY_DN378_c2_g1;TRINI…
transcription factor binding	molecular_function	GO:0008134	457	TRINITY_DN9_c4_g1;TRINITY_DN46_c3_g1;TRINITY_DN29_c5_g1;TRINITY_DN62_c0_g1;TRINITY_DN33_c3_g2;TRINITY_DN48_c1_g1;TRINITY_DN23_c5_g1;TRINITY_DN180_c1_g1;TRINITY_DN177_c0_g2;TRINITY_DN125_c1_g1;TRINITY_DN196_c0_g2;TRINITY_DN165_c1_g3;TRINITY_DN165_c1_g2;TRINITY_DN165_c1_g4;TRINITY_DN188_c0_g2;TRINITY_DN110_c4_g1;TRINITY_DN187_c0_g1;TRINITY_DN178_c1_g1;TRINITY_DN113_c0_g1;TRINITY_DN206_c0_g1;TRINITY…
receptor binding	molecular_function	GO:0005102	451	TRINITY_DN62_c2_g1;TRINITY_DN11_c1_g1;TRINITY_DN96_c0_g1;TRINITY_DN163_c1_g1;TRINITY_DN240_c0_g1;TRINITY_DN217_c11_g1;TRINITY_DN217_c0_g3;TRINITY_DN299_c0_g1;TRINITY_DN293_c0_g1;TRINITY_DN229_c0_g1;TRINITY_DN337_c0_g1;TRINITY_DN337_c0_g2;TRINITY_DN337_c0_g3;TRINITY_DN378_c2_g1;TRINITY_DN315_c0_g2;TRINITY_DN372_c2_g1;TRINITY_DN412_c0_g1;TRINITY_DN551_c1_g1;TRINITY_DN562_c1_g2;TRINITY_DN527_c1_g1;T…
neuron projection	cellular_component	GO:0043005	450	TRINITY_DN56_c2_g2;TRINITY_DN49_c2_g1;TRINITY_DN28_c0_g3;TRINITY_DN48_c1_g1;TRINITY_DN125_c2_g1;TRINITY_DN132_c0_g1;TRINITY_DN124_c0_g1;TRINITY_DN181_c0_g1;TRINITY_DN136_c0_g1;TRINITY_DN182_c0_g1;TRINITY_DN297_c0_g1;TRINITY_DN240_c0_g1;TRINITY_DN270_c0_g1;TRINITY_DN204_c1_g1;TRINITY_DN253_c0_g1;TRINITY_DN231_c0_g1;TRINITY_DN299_c0_g1;TRINITY_DN293_c0_g1;TRINITY_DN277_c0_g1;TRINITY_DN283_c0_g1;TRI…
adaptive immune response	biological_process	GO:0002250	447	TRINITY_DN55_c8_g1;TRINITY_DN152_c0_g2;TRINITY_DN194_c0_g2;TRINITY_DN186_c3_g1;TRINITY_DN139_c0_g1;TRINITY_DN135_c0_g1;TRINITY_DN242_c4_g1;TRINITY_DN381_c1_g4;TRINITY_DN353_c0_g2;TRINITY_DN344_c0_g1;TRINITY_DN426_c0_g4;TRINITY_DN530_c1_g2;TRINITY_DN586_c0_g4;TRINITY_DN598_c2_g1;TRINITY_DN572_c1_g1;TRINITY_DN534_c0_g1;TRINITY_DN695_c0_g1;TRINITY_DN691_c0_g1;TRINITY_DN702_c5_g1;TRINITY_DN779_c1_g3;…
protein kinase activity	molecular_function	GO:0004672	446	TRINITY_DN60_c3_g1;TRINITY_DN70_c1_g1;TRINITY_DN21_c0_g1;TRINITY_DN81_c0_g1;TRINITY_DN49_c1_g1;TRINITY_DN115_c0_g1;TRINITY_DN183_c1_g1;TRINITY_DN223_c0_g1;TRINITY_DN223_c0_g2;TRINITY_DN297_c8_g1;TRINITY_DN226_c0_g1;TRINITY_DN270_c0_g1;TRINITY_DN283_c0_g1;TRINITY_DN389_c0_g1;TRINITY_DN398_c0_g1;TRINITY_DN398_c0_g2;TRINITY_DN348_c0_g1;TRINITY_DN333_c0_g1;TRINITY_DN512_c0_g4;TRINITY_DN518_c0_g1;TRIN…
regulation of membrane potential	biological_process	GO:0042391	444	TRINITY_DN77_c0_g1;TRINITY_DN55_c8_g1;TRINITY_DN151_c2_g3;TRINITY_DN101_c1_g1;TRINITY_DN101_c0_g1;TRINITY_DN194_c0_g2;TRINITY_DN186_c3_g1;TRINITY_DN242_c4_g1;TRINITY_DN297_c0_g1;TRINITY_DN205_c2_g1;TRINITY_DN381_c1_g4;TRINITY_DN344_c0_g1;TRINITY_DN426_c0_g4;TRINITY_DN467_c0_g1;TRINITY_DN455_c0_g1;TRINITY_DN586_c0_g4;TRINITY_DN598_c2_g1;TRINITY_DN779_c1_g3;TRINITY_DN711_c7_g1;TRINITY_DN723_c1_g2;T…
mitochondrial matrix	cellular_component	GO:0005759	442	TRINITY_DN47_c0_g1;TRINITY_DN8_c0_g1;TRINITY_DN25_c0_g1;TRINITY_DN192_c0_g4;TRINITY_DN192_c0_g5;TRINITY_DN126_c0_g1;TRINITY_DN110_c3_g1;TRINITY_DN116_c0_g1;TRINITY_DN116_c0_g3;TRINITY_DN223_c0_g1;TRINITY_DN223_c0_g2;TRINITY_DN261_c1_g1;TRINITY_DN309_c0_g1;TRINITY_DN360_c0_g1;TRINITY_DN316_c0_g1;TRINITY_DN343_c0_g1;TRINITY_DN420_c1_g1;TRINITY_DN421_c0_g1;TRINITY_DN421_c0_g2;TRINITY_DN450_c0_g2;TRI…
lysosome	cellular_component	GO:0005764	437	TRINITY_DN83_c1_g1;TRINITY_DN86_c2_g1;TRINITY_DN86_c3_g2;TRINITY_DN33_c2_g1;TRINITY_DN192_c2_g1;TRINITY_DN136_c0_g1;TRINITY_DN227_c0_g1;TRINITY_DN297_c4_g1;TRINITY_DN291_c0_g1;TRINITY_DN217_c1_g1;TRINITY_DN346_c1_g1;TRINITY_DN308_c0_g1;TRINITY_DN478_c0_g1;TRINITY_DN410_c0_g1;TRINITY_DN496_c1_g1;TRINITY_DN497_c0_g1;TRINITY_DN414_c0_g1;TRINITY_DN486_c0_g1;TRINITY_DN595_c1_g1;TRINITY_DN538_c0_g1;TRI…
inflammatory response	biological_process	GO:0006954	437	TRINITY_DN35_c0_g1;TRINITY_DN83_c1_g1;TRINITY_DN118_c1_g1;TRINITY_DN128_c1_g1;TRINITY_DN152_c0_g2;TRINITY_DN189_c1_g1;TRINITY_DN165_c3_g1;TRINITY_DN204_c1_g1;TRINITY_DN261_c0_g1;TRINITY_DN229_c0_g1;TRINITY_DN393_c0_g1;TRINITY_DN337_c1_g1;TRINITY_DN362_c0_g1;TRINITY_DN452_c1_g1;TRINITY_DN491_c0_g1;TRINITY_DN494_c0_g2;TRINITY_DN463_c1_g1;TRINITY_DN421_c0_g1;TRINITY_DN455_c2_g1;TRINITY_DN538_c1_g2;T…
iron ion binding	molecular_function	GO:0005506	436	TRINITY_DN86_c9_g2;TRINITY_DN99_c0_g4;TRINITY_DN195_c0_g1;TRINITY_DN126_c0_g1;TRINITY_DN289_c0_g1;TRINITY_DN289_c0_g3;TRINITY_DN220_c0_g1;TRINITY_DN444_c1_g1;TRINITY_DN452_c1_g1;TRINITY_DN581_c0_g1;TRINITY_DN633_c0_g1;TRINITY_DN663_c2_g1;TRINITY_DN663_c6_g1;TRINITY_DN638_c2_g1;TRINITY_DN668_c1_g1;TRINITY_DN636_c1_g2;TRINITY_DN636_c1_g1;TRINITY_DN783_c2_g1;TRINITY_DN809_c0_g1;TRINITY_DN813_c0_g1;T…
nuclear speck	cellular_component	GO:0016607	433	TRINITY_DN85_c5_g1;TRINITY_DN85_c2_g1;TRINITY_DN60_c0_g1;TRINITY_DN93_c0_g1;TRINITY_DN74_c0_g1;TRINITY_DN74_c1_g1;TRINITY_DN50_c3_g1;TRINITY_DN38_c1_g1;TRINITY_DN45_c0_g1;TRINITY_DN88_c0_g1;TRINITY_DN76_c11_g1;TRINITY_DN180_c0_g2;TRINITY_DN150_c1_g1;TRINITY_DN151_c0_g2;TRINITY_DN151_c0_g1;TRINITY_DN165_c1_g1;TRINITY_DN296_c0_g1;TRINITY_DN279_c1_g1;TRINITY_DN279_c0_g1;TRINITY_DN279_c0_g2;TRINITY_D…
heart development	biological_process	GO:0007507	432	TRINITY_DN9_c0_g1;TRINITY_DN93_c0_g2;TRINITY_DN21_c0_g3;TRINITY_DN22_c0_g1;TRINITY_DN62_c2_g1;TRINITY_DN62_c0_g1;TRINITY_DN25_c0_g1;TRINITY_DN165_c1_g2;TRINITY_DN165_c1_g4;TRINITY_DN110_c4_g1;TRINITY_DN178_c1_g1;TRINITY_DN100_c0_g1;TRINITY_DN293_c0_g1;TRINITY_DN220_c0_g1;TRINITY_DN347_c0_g1;TRINITY_DN319_c0_g1;TRINITY_DN319_c0_g2;TRINITY_DN332_c4_g2;TRINITY_DN392_c0_g1;TRINITY_DN389_c0_g1;TRINITY…
endosome	cellular_component	GO:0005768	429	TRINITY_DN5_c0_g1;TRINITY_DN10_c1_g1;TRINITY_DN78_c0_g2;TRINITY_DN86_c1_g1;TRINITY_DN56_c2_g2;TRINITY_DN98_c1_g1;TRINITY_DN164_c1_g1;TRINITY_DN189_c1_g1;TRINITY_DN108_c0_g1;TRINITY_DN124_c0_g1;TRINITY_DN246_c0_g1;TRINITY_DN284_c0_g1;TRINITY_DN201_c0_g1;TRINITY_DN271_c0_g1;TRINITY_DN217_c1_g1;TRINITY_DN392_c2_g2;TRINITY_DN371_c0_g1;TRINITY_DN469_c1_g1;TRINITY_DN434_c0_g2;TRINITY_DN447_c0_g2;TRINIT…
transcription coactivator activity	molecular_function	GO:0003713	428	TRINITY_DN93_c0_g1;TRINITY_DN46_c3_g1;TRINITY_DN38_c1_g1;TRINITY_DN62_c0_g1;TRINITY_DN76_c0_g2;TRINITY_DN95_c1_g1;TRINITY_DN183_c0_g2;TRINITY_DN111_c2_g1;TRINITY_DN165_c1_g3;TRINITY_DN165_c1_g2;TRINITY_DN165_c1_g1;TRINITY_DN110_c4_g1;TRINITY_DN110_c1_g3;TRINITY_DN110_c1_g2;TRINITY_DN110_c1_g1;TRINITY_DN178_c1_g1;TRINITY_DN197_c1_g1;TRINITY_DN246_c0_g1;TRINITY_DN264_c2_g2;TRINITY_DN220_c1_g1;TRINI…
RNA splicing	biological_process	GO:0008380	427	TRINITY_DN85_c2_g1;TRINITY_DN55_c3_g2;TRINITY_DN36_c0_g1;TRINITY_DN5_c0_g2;TRINITY_DN81_c0_g1;TRINITY_DN81_c0_g2;TRINITY_DN0_c1_g1;TRINITY_DN150_c1_g1;TRINITY_DN111_c0_g1;TRINITY_DN165_c0_g2;TRINITY_DN209_c0_g2;TRINITY_DN219_c1_g2;TRINITY_DN257_c2_g1;TRINITY_DN220_c0_g1;TRINITY_DN331_c0_g1;TRINITY_DN331_c0_g3;TRINITY_DN381_c2_g1;TRINITY_DN349_c0_g1;TRINITY_DN349_c0_g2;TRINITY_DN327_c0_g1;TRINITY_…
proteinaceous extracellular matrix	cellular_component	GO:0005578	424	TRINITY_DN78_c6_g1;TRINITY_DN86_c12_g1;TRINITY_DN41_c0_g2;TRINITY_DN13_c0_g2;TRINITY_DN28_c0_g3;TRINITY_DN148_c0_g1;TRINITY_DN176_c0_g1;TRINITY_DN156_c1_g2;TRINITY_DN226_c0_g1;TRINITY_DN205_c0_g1;TRINITY_DN235_c1_g1;TRINITY_DN221_c0_g1;TRINITY_DN217_c11_g1;TRINITY_DN217_c0_g3;TRINITY_DN302_c0_g1;TRINITY_DN324_c0_g1;TRINITY_DN343_c0_g1;TRINITY_DN467_c7_g1;TRINITY_DN491_c2_g6;TRINITY_DN471_c0_g1;TR…
protein autophosphorylation	biological_process	GO:0046777	423	TRINITY_DN35_c0_g1;TRINITY_DN86_c3_g1;TRINITY_DN86_c3_g3;TRINITY_DN86_c3_g2;TRINITY_DN86_c3_g4;TRINITY_DN86_c1_g1;TRINITY_DN49_c1_g1;TRINITY_DN99_c0_g1;TRINITY_DN164_c0_g1;TRINITY_DN164_c0_g2;TRINITY_DN164_c1_g1;TRINITY_DN270_c0_g1;TRINITY_DN395_c1_g1;TRINITY_DN348_c0_g2;TRINITY_DN333_c0_g1;TRINITY_DN356_c0_g1;TRINITY_DN452_c0_g1;TRINITY_DN438_c1_g1;TRINITY_DN466_c2_g1;TRINITY_DN499_c0_g1;TRINITY…
mRNA processing	biological_process	GO:0006397	419	TRINITY_DN85_c2_g1;TRINITY_DN36_c0_g1;TRINITY_DN81_c0_g1;TRINITY_DN81_c0_g2;TRINITY_DN0_c1_g1;TRINITY_DN150_c1_g1;TRINITY_DN111_c0_g1;TRINITY_DN113_c0_g1;TRINITY_DN219_c1_g2;TRINITY_DN220_c0_g1;TRINITY_DN278_c0_g2;TRINITY_DN381_c2_g1;TRINITY_DN349_c0_g1;TRINITY_DN349_c0_g2;TRINITY_DN316_c0_g1;TRINITY_DN327_c0_g1;TRINITY_DN320_c0_g1;TRINITY_DN408_c0_g1;TRINITY_DN412_c0_g1;TRINITY_DN466_c0_g1;TRINI…
ATPase activity	molecular_function	GO:0016887	418	TRINITY_DN85_c1_g1;TRINITY_DN186_c0_g1;TRINITY_DN121_c1_g2;TRINITY_DN121_c1_g1;TRINITY_DN299_c0_g1;TRINITY_DN338_c1_g1;TRINITY_DN420_c0_g1;TRINITY_DN420_c0_g2;TRINITY_DN596_c1_g1;TRINITY_DN674_c2_g1;TRINITY_DN657_c0_g1;TRINITY_DN691_c0_g1;TRINITY_DN649_c4_g1;TRINITY_DN796_c0_g2;TRINITY_DN796_c0_g3;TRINITY_DN796_c1_g1;TRINITY_DN702_c0_g1;TRINITY_DN783_c0_g1;TRINITY_DN786_c0_g1;TRINITY_DN833_c0_g1;…
early endosome	cellular_component	GO:0005769	414	TRINITY_DN5_c0_g1;TRINITY_DN78_c12_g1;TRINITY_DN88_c2_g1;TRINITY_DN192_c2_g1;TRINITY_DN132_c0_g1;TRINITY_DN154_c1_g1;TRINITY_DN124_c0_g1;TRINITY_DN267_c2_g4;TRINITY_DN200_c1_g1;TRINITY_DN264_c3_g1;TRINITY_DN360_c0_g1;TRINITY_DN322_c2_g1;TRINITY_DN371_c0_g1;TRINITY_DN372_c7_g1;TRINITY_DN469_c1_g1;TRINITY_DN462_c5_g1;TRINITY_DN519_c0_g1;TRINITY_DN538_c0_g1;TRINITY_DN505_c0_g1;TRINITY_DN577_c0_g1;TR…
regulation of dendrite morphogenesis	biological_process	GO:0048814	413	TRINITY_DN55_c8_g1;TRINITY_DN194_c0_g2;TRINITY_DN186_c3_g1;TRINITY_DN182_c0_g1;TRINITY_DN242_c4_g1;TRINITY_DN381_c1_g4;TRINITY_DN348_c4_g1;TRINITY_DN344_c0_g1;TRINITY_DN426_c0_g4;TRINITY_DN452_c0_g1;TRINITY_DN452_c3_g1;TRINITY_DN510_c1_g1;TRINITY_DN586_c0_g4;TRINITY_DN598_c2_g1;TRINITY_DN661_c2_g1;TRINITY_DN779_c1_g3;TRINITY_DN711_c7_g1;TRINITY_DN723_c1_g2;TRINITY_DN873_c1_g1;TRINITY_DN1000_c0_g1…
transport	biological_process	GO:0006810	412	TRINITY_DN42_c1_g1;TRINITY_DN123_c0_g1;TRINITY_DN151_c7_g1;TRINITY_DN275_c0_g1;TRINITY_DN392_c1_g1;TRINITY_DN451_c0_g1;TRINITY_DN475_c0_g1;TRINITY_DN455_c0_g1;TRINITY_DN546_c0_g1;TRINITY_DN678_c0_g1;TRINITY_DN786_c0_g1;TRINITY_DN748_c0_g1;TRINITY_DN748_c0_g3;TRINITY_DN867_c0_g1;TRINITY_DN885_c0_g2;TRINITY_DN886_c0_g1;TRINITY_DN855_c0_g4;TRINITY_DN855_c0_g1;TRINITY_DN828_c5_g1;TRINITY_DN984_c10_g1…
angiogenesis	biological_process	GO:0001525	412	TRINITY_DN5_c0_g2;TRINITY_DN78_c12_g1;TRINITY_DN86_c3_g1;TRINITY_DN86_c3_g3;TRINITY_DN86_c3_g4;TRINITY_DN13_c0_g1;TRINITY_DN13_c0_g2;TRINITY_DN25_c0_g1;TRINITY_DN103_c1_g1;TRINITY_DN153_c1_g1;TRINITY_DN184_c1_g1;TRINITY_DN178_c1_g1;TRINITY_DN251_c9_g1;TRINITY_DN235_c1_g1;TRINITY_DN329_c0_g1;TRINITY_DN307_c3_g1;TRINITY_DN322_c4_g1;TRINITY_DN332_c4_g2;TRINITY_DN372_c3_g1;TRINITY_DN477_c1_g2;TRINITY…
positive regulation of protein catabolic process	biological_process	GO:0045732	407	TRINITY_DN55_c8_g1;TRINITY_DN29_c5_g1;TRINITY_DN1_c3_g1;TRINITY_DN1_c3_g2;TRINITY_DN125_c0_g1;TRINITY_DN176_c0_g1;TRINITY_DN194_c0_g2;TRINITY_DN186_c3_g1;TRINITY_DN242_c4_g1;TRINITY_DN217_c0_g3;TRINITY_DN381_c1_g4;TRINITY_DN344_c0_g1;TRINITY_DN426_c0_g4;TRINITY_DN485_c0_g1;TRINITY_DN502_c0_g1;TRINITY_DN586_c0_g4;TRINITY_DN598_c2_g1;TRINITY_DN650_c0_g1;TRINITY_DN612_c0_g1;TRINITY_DN704_c0_g1;TRINI…
brain development	biological_process	GO:0007420	406	TRINITY_DN70_c0_g2;TRINITY_DN86_c3_g4;TRINITY_DN8_c1_g1;TRINITY_DN14_c0_g1;TRINITY_DN112_c3_g1;TRINITY_DN128_c4_g1;TRINITY_DN165_c1_g4;TRINITY_DN101_c0_g1;TRINITY_DN124_c0_g2;TRINITY_DN178_c1_g1;TRINITY_DN191_c0_g1;TRINITY_DN214_c0_g1;TRINITY_DN203_c1_g1;TRINITY_DN342_c0_g1;TRINITY_DN378_c0_g1;TRINITY_DN389_c0_g1;TRINITY_DN362_c0_g1;TRINITY_DN308_c1_g1;TRINITY_DN481_c1_g4;TRINITY_DN512_c0_g3;TRIN…
response to denervation involved in regulation of muscle adaptation	biological_process	GO:0014894	405	TRINITY_DN55_c8_g1;TRINITY_DN194_c0_g2;TRINITY_DN186_c3_g1;TRINITY_DN242_c4_g1;TRINITY_DN381_c1_g4;TRINITY_DN348_c4_g1;TRINITY_DN344_c0_g1;TRINITY_DN426_c0_g4;TRINITY_DN452_c3_g1;TRINITY_DN510_c1_g1;TRINITY_DN586_c0_g4;TRINITY_DN598_c2_g1;TRINITY_DN661_c2_g1;TRINITY_DN779_c1_g3;TRINITY_DN711_c7_g1;TRINITY_DN723_c1_g2;TRINITY_DN873_c1_g1;TRINITY_DN1000_c0_g1;TRINITY_DN1158_c13_g1;TRINITY_DN1182_c0…
negative regulation of vascular endothelial growth factor receptor signaling pathway	biological_process	GO:0030948	404	TRINITY_DN55_c8_g1;TRINITY_DN194_c0_g2;TRINITY_DN186_c3_g1;TRINITY_DN242_c4_g1;TRINITY_DN381_c1_g4;TRINITY_DN348_c4_g1;TRINITY_DN344_c0_g1;TRINITY_DN426_c0_g4;TRINITY_DN452_c3_g1;TRINITY_DN510_c1_g1;TRINITY_DN586_c0_g4;TRINITY_DN598_c2_g1;TRINITY_DN661_c2_g1;TRINITY_DN612_c0_g1;TRINITY_DN779_c1_g3;TRINITY_DN711_c7_g1;TRINITY_DN723_c1_g2;TRINITY_DN873_c1_g1;TRINITY_DN1000_c0_g1;TRINITY_DN1158_c13_…
establishment of integrated proviral latency	biological_process	GO:0075713	402	TRINITY_DN50_c5_g1;TRINITY_DN1_c2_g1;TRINITY_DN1_c6_g1;TRINITY_DN150_c0_g1;TRINITY_DN420_c3_g1;TRINITY_DN479_c4_g1;TRINITY_DN479_c1_g1;TRINITY_DN479_c6_g1;TRINITY_DN742_c3_g2;TRINITY_DN889_c1_g2;TRINITY_DN1130_c6_g1;TRINITY_DN1489_c3_g3;TRINITY_DN1489_c3_g4;TRINITY_DN1617_c8_g1;TRINITY_DN1777_c2_g2;TRINITY_DN1777_c18_g1;TRINITY_DN1737_c1_g1;TRINITY_DN1834_c0_g1;TRINITY_DN1924_c0_g1;TRINITY_DN2081…
cell migration	biological_process	GO:0016477	400	TRINITY_DN93_c1_g1;TRINITY_DN21_c0_g1;TRINITY_DN86_c3_g1;TRINITY_DN86_c3_g3;TRINITY_DN86_c1_g1;TRINITY_DN67_c0_g1;TRINITY_DN111_c12_g1;TRINITY_DN165_c1_g4;TRINITY_DN108_c2_g1;TRINITY_DN191_c0_g2;TRINITY_DN200_c1_g1;TRINITY_DN260_c0_g1;TRINITY_DN288_c6_g1;TRINITY_DN221_c0_g1;TRINITY_DN217_c0_g3;TRINITY_DN451_c2_g3;TRINITY_DN471_c0_g1;TRINITY_DN485_c0_g1;TRINITY_DN512_c0_g1;TRINITY_DN546_c1_g1;TRIN…
DNA-directed DNA polymerase activity	molecular_function	GO:0003887	398	TRINITY_DN1_c2_g1;TRINITY_DN1_c6_g1;TRINITY_DN150_c0_g1;TRINITY_DN326_c0_g1;TRINITY_DN498_c0_g2;TRINITY_DN420_c3_g1;TRINITY_DN479_c4_g1;TRINITY_DN479_c1_g1;TRINITY_DN479_c6_g1;TRINITY_DN517_c0_g1;TRINITY_DN742_c3_g2;TRINITY_DN832_c1_g1;TRINITY_DN889_c1_g2;TRINITY_DN800_c1_g1;TRINITY_DN1015_c0_g1;TRINITY_DN1127_c0_g1;TRINITY_DN1150_c1_g3;TRINITY_DN1240_c0_g1;TRINITY_DN1489_c3_g3;TRINITY_DN1535_c0_…
ubiquitin-dependent protein catabolic process	biological_process	GO:0006511	397	TRINITY_DN50_c0_g1;TRINITY_DN22_c1_g2;TRINITY_DN45_c0_g1;TRINITY_DN76_c0_g4;TRINITY_DN76_c0_g2;TRINITY_DN28_c0_g2;TRINITY_DN192_c0_g4;TRINITY_DN192_c0_g5;TRINITY_DN162_c0_g1;TRINITY_DN176_c1_g3;TRINITY_DN227_c0_g1;TRINITY_DN245_c3_g1;TRINITY_DN222_c0_g1;TRINITY_DN222_c0_g2;TRINITY_DN338_c3_g1;TRINITY_DN430_c0_g1;TRINITY_DN482_c1_g4;TRINITY_DN422_c0_g1;TRINITY_DN422_c0_g2;TRINITY_DN422_c0_g3;TRINI…
carbohydrate metabolic process	biological_process	GO:0005975	393	TRINITY_DN20_c0_g1;TRINITY_DN29_c3_g1;TRINITY_DN128_c0_g2;TRINITY_DN134_c1_g1;TRINITY_DN176_c4_g1;TRINITY_DN130_c5_g1;TRINITY_DN160_c0_g1;TRINITY_DN202_c1_g1;TRINITY_DN297_c3_g1;TRINITY_DN330_c0_g1;TRINITY_DN383_c0_g1;TRINITY_DN376_c0_g1;TRINITY_DN308_c0_g1;TRINITY_DN482_c1_g2;TRINITY_DN564_c0_g1;TRINITY_DN564_c0_g2;TRINITY_DN623_c3_g2;TRINITY_DN739_c0_g1;TRINITY_DN740_c1_g1;TRINITY_DN843_c3_g2;T…
positive regulation of phosphatidylinositol 3-kinase signaling	biological_process	GO:0014068	392	TRINITY_DN55_c8_g1;TRINITY_DN86_c3_g1;TRINITY_DN86_c3_g3;TRINITY_DN194_c0_g2;TRINITY_DN186_c3_g1;TRINITY_DN191_c0_g2;TRINITY_DN242_c4_g1;TRINITY_DN381_c1_g4;TRINITY_DN344_c0_g1;TRINITY_DN426_c0_g4;TRINITY_DN586_c0_g4;TRINITY_DN598_c2_g1;TRINITY_DN520_c3_g3;TRINITY_DN658_c0_g1;TRINITY_DN779_c1_g3;TRINITY_DN711_c7_g1;TRINITY_DN723_c1_g2;TRINITY_DN728_c3_g1;TRINITY_DN873_c1_g1;TRINITY_DN1000_c0_g1;T…
ubiquitin protein ligase binding	molecular_function	GO:0031625	390	TRINITY_DN49_c4_g1;TRINITY_DN192_c0_g4;TRINITY_DN192_c0_g5;TRINITY_DN195_c0_g1;TRINITY_DN101_c0_g1;TRINITY_DN109_c1_g1;TRINITY_DN113_c1_g1;TRINITY_DN139_c0_g1;TRINITY_DN259_c4_g2;TRINITY_DN244_c0_g1;TRINITY_DN244_c0_g2;TRINITY_DN297_c4_g1;TRINITY_DN264_c0_g1;TRINITY_DN336_c0_g1;TRINITY_DN381_c3_g1;TRINITY_DN338_c3_g1;TRINITY_DN428_c3_g1;TRINITY_DN551_c1_g1;TRINITY_DN543_c0_g2;TRINITY_DN723_c1_g3;…
actin cytoskeleton	cellular_component	GO:0015629	387	TRINITY_DN72_c2_g2;TRINITY_DN56_c2_g2;TRINITY_DN45_c0_g1;TRINITY_DN1_c0_g1;TRINITY_DN124_c0_g1;TRINITY_DN181_c0_g1;TRINITY_DN178_c0_g2;TRINITY_DN258_c3_g1;TRINITY_DN275_c1_g2;TRINITY_DN387_c4_g1;TRINITY_DN337_c0_g1;TRINITY_DN337_c0_g2;TRINITY_DN337_c0_g3;TRINITY_DN336_c0_g1;TRINITY_DN376_c0_g1;TRINITY_DN348_c1_g1;TRINITY_DN451_c2_g3;TRINITY_DN436_c0_g1;TRINITY_DN458_c2_g1;TRINITY_DN423_c1_g1;TRIN…
synapse	cellular_component	GO:0045202	386	TRINITY_DN10_c1_g1;TRINITY_DN56_c2_g2;TRINITY_DN132_c0_g1;TRINITY_DN164_c1_g1;TRINITY_DN151_c2_g3;TRINITY_DN114_c0_g1;TRINITY_DN182_c0_g1;TRINITY_DN249_c0_g1;TRINITY_DN200_c0_g1;TRINITY_DN271_c0_g3;TRINITY_DN205_c2_g1;TRINITY_DN231_c0_g1;TRINITY_DN299_c0_g1;TRINITY_DN264_c0_g1;TRINITY_DN321_c0_g1;TRINITY_DN355_c0_g1;TRINITY_DN373_c0_g1;TRINITY_DN467_c0_g1;TRINITY_DN459_c0_g1;TRINITY_DN546_c3_g1;T…
external side of plasma membrane	cellular_component	GO:0009897	384	TRINITY_DN195_c0_g1;TRINITY_DN291_c0_g1;TRINITY_DN264_c1_g1;TRINITY_DN316_c2_g1;TRINITY_DN372_c2_g1;TRINITY_DN496_c1_g1;TRINITY_DN459_c0_g1;TRINITY_DN580_c0_g1;TRINITY_DN545_c0_g1;TRINITY_DN765_c0_g1;TRINITY_DN794_c0_g1;TRINITY_DN850_c0_g1;TRINITY_DN850_c0_g2;TRINITY_DN937_c0_g1;TRINITY_DN949_c1_g1;TRINITY_DN1044_c0_g1;TRINITY_DN1033_c0_g1;TRINITY_DN1231_c0_g2;TRINITY_DN1275_c0_g1;TRINITY_DN1275_…
blood coagulation	biological_process	GO:0007596	383	TRINITY_DN203_c0_g3;TRINITY_DN229_c0_g1;TRINITY_DN307_c2_g1;TRINITY_DN336_c0_g1;TRINITY_DN399_c1_g1;TRINITY_DN319_c0_g2;TRINITY_DN376_c0_g1;TRINITY_DN459_c0_g1;TRINITY_DN555_c0_g1;TRINITY_DN586_c0_g1;TRINITY_DN520_c2_g1;TRINITY_DN665_c6_g1;TRINITY_DN619_c0_g1;TRINITY_DN670_c0_g1;TRINITY_DN767_c0_g1;TRINITY_DN767_c0_g2;TRINITY_DN716_c0_g1;TRINITY_DN825_c0_g2;TRINITY_DN800_c0_g2;TRINITY_DN935_c2_g1…
proteolysis	biological_process	GO:0006508	382	TRINITY_DN86_c8_g1;TRINITY_DN29_c1_g1;TRINITY_DN0_c2_g1;TRINITY_DN84_c0_g1;TRINITY_DN11_c1_g1;TRINITY_DN143_c1_g2;TRINITY_DN260_c0_g1;TRINITY_DN260_c1_g2;TRINITY_DN260_c1_g1;TRINITY_DN291_c0_g1;TRINITY_DN306_c0_g2;TRINITY_DN394_c1_g1;TRINITY_DN300_c0_g1;TRINITY_DN410_c0_g1;TRINITY_DN469_c0_g1;TRINITY_DN469_c2_g1;TRINITY_DN530_c1_g2;TRINITY_DN561_c1_g1;TRINITY_DN528_c1_g2;TRINITY_DN677_c1_g1;TRINI…
transcription factor complex	cellular_component	GO:0005667	379	TRINITY_DN85_c1_g1;TRINITY_DN89_c0_g2;TRINITY_DN21_c1_g1;TRINITY_DN38_c1_g1;TRINITY_DN42_c0_g2;TRINITY_DN75_c1_g2;TRINITY_DN75_c6_g1;TRINITY_DN11_c0_g1;TRINITY_DN33_c3_g2;TRINITY_DN165_c1_g3;TRINITY_DN165_c1_g2;TRINITY_DN109_c1_g1;TRINITY_DN110_c4_g1;TRINITY_DN197_c1_g1;TRINITY_DN248_c0_g1;TRINITY_DN248_c0_g2;TRINITY_DN244_c0_g1;TRINITY_DN241_c0_g1;TRINITY_DN307_c2_g1;TRINITY_DN346_c0_g2;TRINITY_…
Fc-epsilon receptor signaling pathway	biological_process	GO:0038095	379	TRINITY_DN54_c0_g1;TRINITY_DN86_c2_g1;TRINITY_DN86_c3_g1;TRINITY_DN86_c3_g3;TRINITY_DN86_c3_g2;TRINITY_DN86_c1_g1;TRINITY_DN152_c0_g2;TRINITY_DN203_c0_g2;TRINITY_DN203_c0_g3;TRINITY_DN264_c0_g1;TRINITY_DN306_c1_g1;TRINITY_DN351_c1_g1;TRINITY_DN348_c0_g1;TRINITY_DN333_c0_g1;TRINITY_DN426_c0_g2;TRINITY_DN426_c0_g3;TRINITY_DN475_c10_g1;TRINITY_DN521_c0_g1;TRINITY_DN548_c5_g2;TRINITY_DN552_c0_g1;TRIN…
neuromuscular junction development	biological_process	GO:0007528	377	TRINITY_DN55_c8_g1;TRINITY_DN194_c0_g2;TRINITY_DN186_c3_g1;TRINITY_DN242_c4_g1;TRINITY_DN381_c1_g4;TRINITY_DN321_c0_g1;TRINITY_DN373_c0_g1;TRINITY_DN344_c0_g1;TRINITY_DN426_c0_g4;TRINITY_DN519_c0_g1;TRINITY_DN533_c1_g1;TRINITY_DN586_c0_g4;TRINITY_DN598_c2_g1;TRINITY_DN572_c6_g1;TRINITY_DN779_c1_g3;TRINITY_DN711_c7_g1;TRINITY_DN723_c1_g2;TRINITY_DN873_c1_g1;TRINITY_DN957_c0_g1;TRINITY_DN921_c0_g2;…
G-protein coupled receptor signaling pathway	biological_process	GO:0007186	376	TRINITY_DN22_c0_g5;TRINITY_DN22_c0_g1;TRINITY_DN22_c0_g3;TRINITY_DN43_c0_g2;TRINITY_DN13_c0_g1;TRINITY_DN132_c0_g2;TRINITY_DN164_c1_g1;TRINITY_DN216_c1_g1;TRINITY_DN251_c9_g1;TRINITY_DN204_c1_g1;TRINITY_DN217_c1_g1;TRINITY_DN301_c0_g1;TRINITY_DN372_c2_g1;TRINITY_DN416_c0_g1;TRINITY_DN485_c1_g1;TRINITY_DN503_c2_g1;TRINITY_DN504_c1_g3;TRINITY_DN504_c1_g1;TRINITY_DN566_c0_g1;TRINITY_DN682_c2_g1;TRIN…
protein C-terminus binding	molecular_function	GO:0008022	374	TRINITY_DN46_c0_g3;TRINITY_DN54_c0_g1;TRINITY_DN20_c0_g2;TRINITY_DN62_c0_g1;TRINITY_DN75_c1_g2;TRINITY_DN115_c1_g3;TRINITY_DN115_c1_g2;TRINITY_DN165_c1_g2;TRINITY_DN203_c0_g3;TRINITY_DN231_c0_g1;TRINITY_DN299_c0_g1;TRINITY_DN385_c0_g1;TRINITY_DN317_c0_g1;TRINITY_DN322_c0_g1;TRINITY_DN348_c4_g1;TRINITY_DN358_c0_g1;TRINITY_DN372_c13_g1;TRINITY_DN426_c0_g1;TRINITY_DN452_c3_g1;TRINITY_DN451_c2_g2;TRI…
carbohydrate binding	molecular_function	GO:0030246	372	TRINITY_DN61_c1_g2;TRINITY_DN61_c1_g1;TRINITY_DN61_c6_g1;TRINITY_DN69_c2_g2;TRINITY_DN193_c0_g1;TRINITY_DN193_c0_g2;TRINITY_DN195_c0_g1;TRINITY_DN130_c3_g1;TRINITY_DN139_c0_g1;TRINITY_DN219_c3_g1;TRINITY_DN322_c4_g1;TRINITY_DN392_c2_g2;TRINITY_DN496_c1_g1;TRINITY_DN483_c1_g1;TRINITY_DN593_c0_g1;TRINITY_DN601_c4_g1;TRINITY_DN643_c1_g1;TRINITY_DN641_c3_g1;TRINITY_DN611_c3_g1;TRINITY_DN715_c0_g1;TRI…
outflow tract morphogenesis	biological_process	GO:0003151	367	TRINITY_DN55_c8_g1;TRINITY_DN42_c0_g2;TRINITY_DN45_c1_g1;TRINITY_DN194_c0_g2;TRINITY_DN186_c3_g1;TRINITY_DN242_c4_g1;TRINITY_DN240_c0_g1;TRINITY_DN381_c1_g4;TRINITY_DN344_c0_g1;TRINITY_DN477_c1_g2;TRINITY_DN426_c0_g4;TRINITY_DN586_c0_g4;TRINITY_DN598_c2_g1;TRINITY_DN703_c1_g1;TRINITY_DN779_c1_g3;TRINITY_DN711_c7_g1;TRINITY_DN723_c1_g2;TRINITY_DN873_c1_g1;TRINITY_DN1044_c0_g1;TRINITY_DN1000_c0_g1;…
neurotrophin TRK receptor signaling pathway	biological_process	GO:0048011	366	TRINITY_DN54_c0_g1;TRINITY_DN35_c0_g1;TRINITY_DN86_c2_g1;TRINITY_DN86_c3_g1;TRINITY_DN86_c3_g3;TRINITY_DN86_c3_g2;TRINITY_DN86_c1_g1;TRINITY_DN152_c0_g2;TRINITY_DN202_c1_g1;TRINITY_DN252_c0_g2;TRINITY_DN203_c0_g2;TRINITY_DN203_c0_g3;TRINITY_DN264_c0_g1;TRINITY_DN220_c16_g1;TRINITY_DN329_c0_g1;TRINITY_DN307_c2_g1;TRINITY_DN306_c1_g1;TRINITY_DN351_c1_g1;TRINITY_DN339_c1_g1;TRINITY_DN348_c0_g1;TRINI…
Type II site-specific deoxyribonuclease activity	molecular_function	GO:0009036	365	TRINITY_DN1_c10_g1;TRINITY_DN489_c4_g1;TRINITY_DN593_c4_g1;TRINITY_DN743_c2_g1;TRINITY_DN875_c1_g1;TRINITY_DN1228_c10_g1;TRINITY_DN1321_c8_g1;TRINITY_DN1553_c0_g2;TRINITY_DN2231_c3_g2;TRINITY_DN2463_c0_g5;TRINITY_DN2539_c2_g2;TRINITY_DN3088_c8_g1;TRINITY_DN3278_c2_g1;TRINITY_DN3360_c0_g1;TRINITY_DN3695_c0_g2;TRINITY_DN3663_c0_g2;TRINITY_DN4084_c10_g1;TRINITY_DN4136_c0_g4;TRINITY_DN4109_c3_g1;TRIN…
transposition, RNA-mediated	biological_process	GO:0032197	364	TRINITY_DN1_c10_g1;TRINITY_DN489_c4_g1;TRINITY_DN593_c4_g1;TRINITY_DN743_c2_g1;TRINITY_DN875_c1_g1;TRINITY_DN1228_c10_g1;TRINITY_DN1321_c8_g1;TRINITY_DN1553_c0_g2;TRINITY_DN2231_c3_g2;TRINITY_DN2463_c0_g5;TRINITY_DN2539_c2_g2;TRINITY_DN3088_c8_g1;TRINITY_DN3278_c2_g1;TRINITY_DN3360_c0_g1;TRINITY_DN3695_c0_g2;TRINITY_DN3663_c0_g2;TRINITY_DN4084_c10_g1;TRINITY_DN4136_c0_g4;TRINITY_DN4109_c3_g1;TRIN…
structural molecule activity	molecular_function	GO:0005198	364	TRINITY_DN39_c1_g2;TRINITY_DN74_c0_g1;TRINITY_DN74_c0_g2;TRINITY_DN74_c0_g3;TRINITY_DN3_c0_g1;TRINITY_DN49_c2_g1;TRINITY_DN150_c0_g1;TRINITY_DN184_c1_g1;TRINITY_DN110_c0_g1;TRINITY_DN214_c0_g1;TRINITY_DN244_c5_g1;TRINITY_DN200_c0_g1;TRINITY_DN287_c1_g1;TRINITY_DN236_c0_g2;TRINITY_DN221_c0_g1;TRINITY_DN378_c2_g1;TRINITY_DN336_c0_g1;TRINITY_DN321_c0_g1;TRINITY_DN471_c0_g1;TRINITY_DN420_c3_g1;TRINIT…
lamellipodium	cellular_component	GO:0030027	364	TRINITY_DN72_c2_g2;TRINITY_DN5_c0_g1;TRINITY_DN62_c2_g1;TRINITY_DN11_c1_g1;TRINITY_DN132_c0_g1;TRINITY_DN121_c1_g2;TRINITY_DN121_c1_g1;TRINITY_DN156_c1_g1;TRINITY_DN191_c1_g1;TRINITY_DN268_c0_g1;TRINITY_DN220_c16_g1;TRINITY_DN312_c0_g1;TRINITY_DN387_c4_g1;TRINITY_DN331_c0_g1;TRINITY_DN367_c0_g1;TRINITY_DN389_c0_g1;TRINITY_DN451_c2_g3;TRINITY_DN492_c1_g2;TRINITY_DN447_c0_g2;TRINITY_DN519_c0_g1;TRI…
Wnt signaling pathway	biological_process	GO:0016055	363	TRINITY_DN46_c3_g1;TRINITY_DN40_c0_g1;TRINITY_DN76_c11_g1;TRINITY_DN33_c3_g2;TRINITY_DN180_c0_g2;TRINITY_DN115_c0_g2;TRINITY_DN162_c0_g1;TRINITY_DN219_c0_g1;TRINITY_DN240_c0_g1;TRINITY_DN252_c0_g1;TRINITY_DN217_c11_g1;TRINITY_DN217_c0_g3;TRINITY_DN381_c1_g2;TRINITY_DN381_c1_g1;TRINITY_DN354_c1_g1;TRINITY_DN391_c0_g1;TRINITY_DN332_c0_g1;TRINITY_DN332_c1_g1;TRINITY_DN373_c0_g1;TRINITY_DN315_c0_g2;T…
response to hypoxia	biological_process	GO:0001666	363	TRINITY_DN21_c1_g1;TRINITY_DN97_c4_g1;TRINITY_DN86_c9_g2;TRINITY_DN29_c3_g1;TRINITY_DN13_c0_g1;TRINITY_DN11_c1_g1;TRINITY_DN25_c0_g1;TRINITY_DN111_c2_g1;TRINITY_DN165_c1_g2;TRINITY_DN156_c1_g2;TRINITY_DN258_c0_g1;TRINITY_DN205_c0_g1;TRINITY_DN235_c1_g1;TRINITY_DN253_c0_g1;TRINITY_DN289_c0_g1;TRINITY_DN289_c0_g3;TRINITY_DN264_c2_g2;TRINITY_DN352_c2_g1;TRINITY_DN385_c0_g1;TRINITY_DN412_c0_g1;TRINIT…
intracellular protein transport	biological_process	GO:0006886	361	TRINITY_DN12_c0_g1;TRINITY_DN98_c0_g1;TRINITY_DN1_c1_g1;TRINITY_DN180_c0_g1;TRINITY_DN125_c0_g1;TRINITY_DN151_c2_g3;TRINITY_DN144_c0_g1;TRINITY_DN114_c0_g1;TRINITY_DN113_c1_g1;TRINITY_DN214_c0_g2;TRINITY_DN287_c1_g1;TRINITY_DN264_c3_g1;TRINITY_DN281_c1_g1;TRINITY_DN306_c2_g1;TRINITY_DN339_c1_g1;TRINITY_DN493_c0_g1;TRINITY_DN414_c0_g4;TRINITY_DN414_c0_g6;TRINITY_DN434_c0_g2;TRINITY_DN490_c1_g2;TRI…
reverse transcription involved in RNA-mediated transposition	biological_process	GO:0032199	361	TRINITY_DN1_c10_g1;TRINITY_DN489_c4_g1;TRINITY_DN593_c4_g1;TRINITY_DN743_c2_g1;TRINITY_DN875_c1_g1;TRINITY_DN1228_c10_g1;TRINITY_DN1321_c8_g1;TRINITY_DN1553_c0_g2;TRINITY_DN2231_c3_g2;TRINITY_DN2463_c0_g5;TRINITY_DN2539_c2_g2;TRINITY_DN3088_c8_g1;TRINITY_DN3278_c2_g1;TRINITY_DN3360_c0_g1;TRINITY_DN3695_c0_g2;TRINITY_DN3663_c0_g2;TRINITY_DN4084_c10_g1;TRINITY_DN4136_c0_g4;TRINITY_DN4109_c3_g1;TRIN…
regulation of apoptotic process	biological_process	GO:0042981	360	TRINITY_DN21_c0_g1;TRINITY_DN98_c1_g5;TRINITY_DN14_c0_g1;TRINITY_DN180_c1_g1;TRINITY_DN143_c0_g1;TRINITY_DN115_c0_g1;TRINITY_DN111_c2_g1;TRINITY_DN121_c3_g1;TRINITY_DN264_c2_g2;TRINITY_DN283_c0_g1;TRINITY_DN395_c1_g1;TRINITY_DN305_c0_g1;TRINITY_DN333_c0_g1;TRINITY_DN412_c0_g1;TRINITY_DN425_c0_g1;TRINITY_DN423_c0_g1;TRINITY_DN455_c2_g1;TRINITY_DN538_c1_g2;TRINITY_DN513_c0_g1;TRINITY_DN548_c5_g2;TR…
protein monoubiquitination	biological_process	GO:0006513	358	TRINITY_DN55_c8_g1;TRINITY_DN45_c0_g1;TRINITY_DN133_c1_g1;TRINITY_DN194_c0_g2;TRINITY_DN186_c3_g1;TRINITY_DN242_c4_g1;TRINITY_DN381_c1_g4;TRINITY_DN344_c0_g1;TRINITY_DN426_c0_g4;TRINITY_DN577_c0_g1;TRINITY_DN586_c0_g4;TRINITY_DN598_c2_g1;TRINITY_DN620_c0_g1;TRINITY_DN779_c1_g3;TRINITY_DN711_c7_g1;TRINITY_DN723_c1_g2;TRINITY_DN825_c1_g1;TRINITY_DN873_c1_g1;TRINITY_DN901_c3_g1;TRINITY_DN1000_c0_g1;…
nervous system development	biological_process	GO:0007399	357	TRINITY_DN3_c9_g2;TRINITY_DN192_c0_g5;TRINITY_DN125_c1_g1;TRINITY_DN125_c2_g1;TRINITY_DN165_c1_g2;TRINITY_DN110_c4_g1;TRINITY_DN100_c0_g1;TRINITY_DN219_c0_g1;TRINITY_DN202_c1_g1;TRINITY_DN337_c0_g1;TRINITY_DN308_c0_g1;TRINITY_DN356_c0_g2;TRINITY_DN372_c0_g1;TRINITY_DN474_c1_g2;TRINITY_DN420_c0_g1;TRINITY_DN420_c0_g2;TRINITY_DN558_c0_g1;TRINITY_DN545_c0_g1;TRINITY_DN552_c5_g1;TRINITY_DN650_c0_g1;T…
T cell activation	biological_process	GO:0042110	357	TRINITY_DN55_c8_g1;TRINITY_DN76_c0_g1;TRINITY_DN11_c1_g1;TRINITY_DN152_c0_g2;TRINITY_DN194_c0_g2;TRINITY_DN186_c3_g1;TRINITY_DN242_c4_g1;TRINITY_DN381_c1_g4;TRINITY_DN344_c0_g1;TRINITY_DN426_c0_g4;TRINITY_DN596_c1_g1;TRINITY_DN586_c0_g4;TRINITY_DN598_c2_g1;TRINITY_DN779_c1_g3;TRINITY_DN725_c0_g1;TRINITY_DN711_c7_g1;TRINITY_DN723_c1_g2;TRINITY_DN873_c1_g1;TRINITY_DN1000_c0_g1;TRINITY_DN1102_c0_g2;…
receptor internalization	biological_process	GO:0031623	355	TRINITY_DN55_c8_g1;TRINITY_DN194_c0_g2;TRINITY_DN186_c3_g1;TRINITY_DN242_c4_g1;TRINITY_DN270_c0_g1;TRINITY_DN312_c1_g2;TRINITY_DN312_c1_g1;TRINITY_DN381_c1_g4;TRINITY_DN344_c0_g1;TRINITY_DN426_c0_g4;TRINITY_DN447_c0_g2;TRINITY_DN504_c0_g1;TRINITY_DN586_c0_g4;TRINITY_DN598_c2_g1;TRINITY_DN545_c0_g1;TRINITY_DN718_c0_g2;TRINITY_DN779_c1_g3;TRINITY_DN725_c1_g1;TRINITY_DN711_c7_g1;TRINITY_DN723_c1_g2;…
positive regulation of cell migration	biological_process	GO:0030335	355	TRINITY_DN92_c2_g1;TRINITY_DN70_c0_g2;TRINITY_DN97_c3_g1;TRINITY_DN97_c2_g1;TRINITY_DN13_c0_g2;TRINITY_DN26_c0_g1;TRINITY_DN184_c1_g1;TRINITY_DN196_c0_g2;TRINITY_DN164_c1_g1;TRINITY_DN152_c0_g2;TRINITY_DN151_c6_g1;TRINITY_DN119_c0_g1;TRINITY_DN121_c0_g1;TRINITY_DN221_c0_g1;TRINITY_DN217_c11_g1;TRINITY_DN203_c0_g3;TRINITY_DN277_c0_g2;TRINITY_DN319_c1_g1;TRINITY_DN362_c0_g1;TRINITY_DN477_c0_g3;TRIN…
mitotic cell cycle	biological_process	GO:0000278	353	TRINITY_DN74_c0_g1;TRINITY_DN3_c0_g1;TRINITY_DN40_c0_g1;TRINITY_DN31_c0_g1;TRINITY_DN112_c1_g1;TRINITY_DN134_c1_g1;TRINITY_DN165_c1_g2;TRINITY_DN188_c0_g2;TRINITY_DN187_c0_g1;TRINITY_DN197_c1_g1;TRINITY_DN191_c2_g1;TRINITY_DN352_c3_g1;TRINITY_DN387_c2_g1;TRINITY_DN330_c0_g1;TRINITY_DN379_c1_g1;TRINITY_DN489_c0_g1;TRINITY_DN482_c1_g2;TRINITY_DN434_c1_g1;TRINITY_DN502_c0_g1;TRINITY_DN586_c1_g1;TRIN…
transcription regulatory region DNA binding	molecular_function	GO:0044212	339	TRINITY_DN85_c5_g1;TRINITY_DN46_c3_g1;TRINITY_DN13_c2_g2;TRINITY_DN13_c2_g1;TRINITY_DN165_c1_g4;TRINITY_DN109_c1_g1;TRINITY_DN110_c4_g1;TRINITY_DN265_c0_g1;TRINITY_DN265_c0_g2;TRINITY_DN217_c0_g3;TRINITY_DN220_c2_g1;TRINITY_DN396_c0_g1;TRINITY_DN347_c1_g1;TRINITY_DN319_c0_g1;TRINITY_DN491_c3_g2;TRINITY_DN420_c0_g1;TRINITY_DN463_c0_g1;TRINITY_DN505_c0_g1;TRINITY_DN505_c4_g1;TRINITY_DN529_c0_g1;TRI…
regulation of cell proliferation	biological_process	GO:0042127	339	TRINITY_DN86_c3_g4;TRINITY_DN8_c1_g1;TRINITY_DN62_c2_g1;TRINITY_DN45_c0_g1;TRINITY_DN45_c1_g1;TRINITY_DN0_c2_g1;TRINITY_DN25_c0_g1;TRINITY_DN133_c1_g1;TRINITY_DN121_c0_g1;TRINITY_DN201_c0_g1;TRINITY_DN289_c3_g2;TRINITY_DN283_c0_g1;TRINITY_DN387_c4_g1;TRINITY_DN330_c0_g1;TRINITY_DN471_c0_g1;TRINITY_DN455_c2_g1;TRINITY_DN529_c7_g1;TRINITY_DN580_c0_g1;TRINITY_DN520_c3_g1;TRINITY_DN631_c0_g1;TRINITY_…
protein folding	biological_process	GO:0006457	339	TRINITY_DN52_c0_g1;TRINITY_DN65_c2_g1;TRINITY_DN76_c0_g1;TRINITY_DN180_c1_g1;TRINITY_DN195_c0_g1;TRINITY_DN169_c0_g1;TRINITY_DN267_c2_g4;TRINITY_DN212_c0_g1;TRINITY_DN307_c0_g1;TRINITY_DN307_c0_g2;TRINITY_DN335_c0_g1;TRINITY_DN381_c3_g1;TRINITY_DN322_c3_g1;TRINITY_DN315_c0_g1;TRINITY_DN305_c0_g1;TRINITY_DN465_c2_g2;TRINITY_DN465_c2_g1;TRINITY_DN428_c3_g1;TRINITY_DN520_c4_g1;TRINITY_DN572_c6_g1;TR…
myelin sheath	cellular_component	GO:0043209	334	TRINITY_DN3_c9_g2;TRINITY_DN125_c2_g1;TRINITY_DN122_c1_g1;TRINITY_DN191_c4_g1;TRINITY_DN284_c0_g1;TRINITY_DN271_c0_g1;TRINITY_DN271_c0_g3;TRINITY_DN376_c0_g1;TRINITY_DN332_c3_g1;TRINITY_DN365_c0_g1;TRINITY_DN451_c2_g3;TRINITY_DN447_c0_g1;TRINITY_DN428_c1_g1;TRINITY_DN569_c0_g1;TRINITY_DN550_c0_g1;TRINITY_DN508_c2_g1;TRINITY_DN643_c1_g1;TRINITY_DN725_c1_g1;TRINITY_DN711_c0_g2;TRINITY_DN709_c0_g1;T…
ubiquitin-dependent protein catabolic process via the multivesicular body sorting pathway	biological_process	GO:0043162	334	TRINITY_DN55_c8_g1;TRINITY_DN1_c3_g1;TRINITY_DN1_c3_g2;TRINITY_DN133_c1_g1;TRINITY_DN194_c0_g2;TRINITY_DN186_c3_g1;TRINITY_DN242_c4_g1;TRINITY_DN381_c1_g4;TRINITY_DN344_c0_g1;TRINITY_DN426_c0_g4;TRINITY_DN586_c0_g4;TRINITY_DN598_c2_g1;TRINITY_DN779_c1_g3;TRINITY_DN711_c7_g1;TRINITY_DN723_c1_g2;TRINITY_DN873_c1_g1;TRINITY_DN872_c3_g1;TRINITY_DN1000_c0_g1;TRINITY_DN1084_c1_g1;TRINITY_DN1098_c0_g1;T…
blood vessel morphogenesis	biological_process	GO:0048514	332	TRINITY_DN55_c8_g1;TRINITY_DN86_c3_g4;TRINITY_DN67_c0_g1;TRINITY_DN194_c0_g2;TRINITY_DN186_c3_g1;TRINITY_DN242_c4_g1;TRINITY_DN381_c1_g4;TRINITY_DN344_c0_g1;TRINITY_DN426_c0_g4;TRINITY_DN521_c0_g1;TRINITY_DN586_c0_g4;TRINITY_DN598_c2_g1;TRINITY_DN779_c1_g3;TRINITY_DN711_c7_g1;TRINITY_DN723_c1_g2;TRINITY_DN873_c1_g1;TRINITY_DN921_c0_g2;TRINITY_DN1044_c0_g1;TRINITY_DN1000_c0_g1;TRINITY_DN1182_c0_g1…
cytokine-mediated signaling pathway	biological_process	GO:0019221	331	TRINITY_DN10_c1_g1;TRINITY_DN49_c1_g1;TRINITY_DN76_c0_g1;TRINITY_DN125_c0_g1;TRINITY_DN134_c1_g1;TRINITY_DN165_c3_g1;TRINITY_DN145_c1_g1;TRINITY_DN242_c2_g1;TRINITY_DN330_c0_g1;TRINITY_DN494_c0_g2;TRINITY_DN482_c1_g2;TRINITY_DN400_c0_g1;TRINITY_DN486_c1_g1;TRINITY_DN583_c0_g1;TRINITY_DN518_c1_g1;TRINITY_DN623_c3_g2;TRINITY_DN645_c0_g1;TRINITY_DN645_c0_g2;TRINITY_DN742_c1_g1;TRINITY_DN733_c1_g1;TR…
protein complex binding	molecular_function	GO:0032403	331	TRINITY_DN98_c1_g1;TRINITY_DN8_c1_g1;TRINITY_DN87_c0_g1;TRINITY_DN87_c0_g3;TRINITY_DN125_c2_g1;TRINITY_DN132_c0_g1;TRINITY_DN176_c4_g1;TRINITY_DN178_c1_g1;TRINITY_DN297_c3_g1;TRINITY_DN237_c0_g4;TRINITY_DN237_c0_g2;TRINITY_DN291_c0_g1;TRINITY_DN270_c0_g1;TRINITY_DN205_c2_g1;TRINITY_DN233_c0_g1;TRINITY_DN385_c0_g1;TRINITY_DN315_c0_g2;TRINITY_DN350_c0_g1;TRINITY_DN452_c0_g1;TRINITY_DN405_c1_g1;TRIN…
chromatin organization	biological_process	GO:0006325	331	TRINITY_DN85_c1_g1;TRINITY_DN52_c0_g2;TRINITY_DN93_c0_g1;TRINITY_DN7_c0_g1;TRINITY_DN13_c2_g2;TRINITY_DN13_c2_g1;TRINITY_DN152_c0_g1;TRINITY_DN165_c1_g2;TRINITY_DN204_c0_g1;TRINITY_DN220_c0_g1;TRINITY_DN233_c0_g1;TRINITY_DN277_c0_g1;TRINITY_DN312_c2_g1;TRINITY_DN329_c0_g1;TRINITY_DN307_c2_g1;TRINITY_DN314_c0_g1;TRINITY_DN394_c3_g1;TRINITY_DN394_c2_g1;TRINITY_DN344_c1_g1;TRINITY_DN481_c3_g1;TRINIT…
synaptic transmission	biological_process	GO:0007268	329	TRINITY_DN17_c0_g1;TRINITY_DN48_c1_g1;TRINITY_DN192_c0_g5;TRINITY_DN152_c0_g2;TRINITY_DN152_c0_g3;TRINITY_DN114_c0_g1;TRINITY_DN234_c0_g1;TRINITY_DN234_c0_g2;TRINITY_DN203_c0_g3;TRINITY_DN299_c0_g1;TRINITY_DN264_c0_g1;TRINITY_DN318_c0_g1;TRINITY_DN346_c1_g1;TRINITY_DN339_c1_g1;TRINITY_DN481_c1_g4;TRINITY_DN474_c1_g2;TRINITY_DN455_c0_g1;TRINITY_DN514_c0_g4;TRINITY_DN618_c1_g2;TRINITY_DN618_c0_g1;T…
proline-rich region binding	molecular_function	GO:0070064	327	TRINITY_DN55_c8_g1;TRINITY_DN194_c0_g2;TRINITY_DN186_c3_g1;TRINITY_DN242_c4_g1;TRINITY_DN381_c1_g4;TRINITY_DN322_c0_g1;TRINITY_DN344_c0_g1;TRINITY_DN426_c0_g4;TRINITY_DN586_c0_g4;TRINITY_DN598_c2_g1;TRINITY_DN576_c0_g2;TRINITY_DN779_c1_g3;TRINITY_DN711_c7_g1;TRINITY_DN723_c1_g2;TRINITY_DN873_c1_g1;TRINITY_DN982_c1_g2;TRINITY_DN1000_c0_g1;TRINITY_DN1182_c0_g1;TRINITY_DN1142_c0_g1;TRINITY_DN1282_c5…
cell surface receptor signaling pathway	biological_process	GO:0007166	326	TRINITY_DN35_c0_g1;TRINITY_DN152_c0_g2;TRINITY_DN148_c0_g1;TRINITY_DN203_c0_g3;TRINITY_DN220_c0_g1;TRINITY_DN307_c3_g1;TRINITY_DN353_c0_g2;TRINITY_DN333_c1_g1;TRINITY_DN372_c13_g1;TRINITY_DN493_c0_g1;TRINITY_DN524_c0_g1;TRINITY_DN524_c0_g2;TRINITY_DN551_c1_g1;TRINITY_DN504_c0_g1;TRINITY_DN566_c0_g2;TRINITY_DN718_c0_g2;TRINITY_DN726_c1_g1;TRINITY_DN726_c0_g1;TRINITY_DN772_c6_g1;TRINITY_DN972_c0_g1…
cell-cell junction	cellular_component	GO:0005911	323	TRINITY_DN39_c1_g2;TRINITY_DN86_c1_g1;TRINITY_DN86_c5_g2;TRINITY_DN62_c2_g1;TRINITY_DN103_c1_g1;TRINITY_DN196_c0_g2;TRINITY_DN151_c6_g1;TRINITY_DN148_c0_g1;TRINITY_DN108_c2_g1;TRINITY_DN181_c0_g1;TRINITY_DN293_c0_g1;TRINITY_DN336_c0_g1;TRINITY_DN372_c13_g1;TRINITY_DN405_c1_g1;TRINITY_DN451_c2_g3;TRINITY_DN458_c2_g1;TRINITY_DN459_c0_g1;TRINITY_DN546_c1_g1;TRINITY_DN527_c0_g1;TRINITY_DN527_c0_g2;TR…
protein domain specific binding	molecular_function	GO:0019904	322	TRINITY_DN62_c0_g1;TRINITY_DN1_c1_g1;TRINITY_DN49_c4_g1;TRINITY_DN125_c1_g1;TRINITY_DN181_c0_g1;TRINITY_DN222_c0_g1;TRINITY_DN217_c0_g3;TRINITY_DN299_c0_g1;TRINITY_DN277_c0_g1;TRINITY_DN301_c1_g1;TRINITY_DN302_c1_g2;TRINITY_DN306_c1_g1;TRINITY_DN315_c0_g2;TRINITY_DN350_c0_g1;TRINITY_DN481_c1_g4;TRINITY_DN404_c0_g1;TRINITY_DN494_c0_g2;TRINITY_DN516_c0_g1;TRINITY_DN529_c7_g1;TRINITY_DN545_c0_g1;TRI…
protein targeting to lysosome	biological_process	GO:0006622	319	TRINITY_DN55_c8_g1;TRINITY_DN194_c0_g2;TRINITY_DN186_c3_g1;TRINITY_DN242_c4_g1;TRINITY_DN381_c1_g4;TRINITY_DN344_c0_g1;TRINITY_DN426_c0_g4;TRINITY_DN538_c0_g1;TRINITY_DN586_c0_g4;TRINITY_DN598_c2_g1;TRINITY_DN779_c1_g3;TRINITY_DN711_c7_g1;TRINITY_DN723_c1_g2;TRINITY_DN873_c1_g1;TRINITY_DN1000_c0_g1;TRINITY_DN1182_c0_g1;TRINITY_DN1206_c1_g1;TRINITY_DN1282_c5_g1;TRINITY_DN1429_c0_g2;TRINITY_DN1468_…
receptor catabolic process	biological_process	GO:0032801	319	TRINITY_DN55_c8_g1;TRINITY_DN194_c0_g2;TRINITY_DN186_c3_g1;TRINITY_DN242_c4_g1;TRINITY_DN381_c1_g4;TRINITY_DN344_c0_g1;TRINITY_DN426_c0_g4;TRINITY_DN586_c0_g4;TRINITY_DN598_c2_g1;TRINITY_DN779_c1_g3;TRINITY_DN711_c7_g1;TRINITY_DN723_c1_g2;TRINITY_DN769_c0_g1;TRINITY_DN873_c1_g1;TRINITY_DN1000_c0_g1;TRINITY_DN1182_c0_g1;TRINITY_DN1282_c5_g1;TRINITY_DN1429_c0_g2;TRINITY_DN1468_c3_g1;TRINITY_DN1523_…
microtubule organizing center	cellular_component	GO:0005815	318	TRINITY_DN56_c0_g1;TRINITY_DN65_c3_g1;TRINITY_DN61_c0_g1;TRINITY_DN121_c0_g1;TRINITY_DN219_c0_g1;TRINITY_DN214_c0_g1;TRINITY_DN267_c1_g1;TRINITY_DN297_c0_g1;TRINITY_DN226_c0_g1;TRINITY_DN277_c0_g1;TRINITY_DN286_c0_g2;TRINITY_DN352_c0_g2;TRINITY_DN311_c0_g1;TRINITY_DN319_c1_g1;TRINITY_DN356_c0_g2;TRINITY_DN350_c0_g1;TRINITY_DN441_c0_g1;TRINITY_DN525_c0_g3;TRINITY_DN508_c3_g1;TRINITY_DN623_c1_g1;TR…
regulation of cell shape	biological_process	GO:0008360	318	TRINITY_DN10_c3_g1;TRINITY_DN22_c0_g5;TRINITY_DN13_c0_g2;TRINITY_DN75_c0_g1;TRINITY_DN67_c0_g1;TRINITY_DN125_c10_g2;TRINITY_DN132_c0_g1;TRINITY_DN136_c5_g1;TRINITY_DN191_c0_g1;TRINITY_DN191_c0_g2;TRINITY_DN251_c9_g1;TRINITY_DN312_c0_g1;TRINITY_DN387_c2_g1;TRINITY_DN376_c0_g1;TRINITY_DN315_c0_g2;TRINITY_DN527_c0_g1;TRINITY_DN527_c0_g2;TRINITY_DN521_c0_g1;TRINITY_DN566_c0_g1;TRINITY_DN576_c0_g2;TRI…
signal transducer activity	molecular_function	GO:0004871	317	TRINITY_DN70_c0_g2;TRINITY_DN89_c0_g2;TRINITY_DN35_c0_g1;TRINITY_DN22_c0_g5;TRINITY_DN22_c0_g1;TRINITY_DN22_c0_g2;TRINITY_DN22_c0_g3;TRINITY_DN43_c0_g2;TRINITY_DN63_c0_g1;TRINITY_DN1_c3_g1;TRINITY_DN1_c3_g2;TRINITY_DN76_c0_g1;TRINITY_DN23_c2_g1;TRINITY_DN165_c3_g1;TRINITY_DN157_c1_g1;TRINITY_DN251_c9_g1;TRINITY_DN370_c2_g1;TRINITY_DN438_c3_g1;TRINITY_DN421_c0_g1;TRINITY_DN485_c1_g1;TRINITY_DN486_…
sodium channel inhibitor activity	molecular_function	GO:0019871	315	TRINITY_DN55_c8_g1;TRINITY_DN194_c0_g2;TRINITY_DN186_c3_g1;TRINITY_DN242_c4_g1;TRINITY_DN381_c1_g4;TRINITY_DN344_c0_g1;TRINITY_DN426_c0_g4;TRINITY_DN586_c0_g4;TRINITY_DN598_c2_g1;TRINITY_DN779_c1_g3;TRINITY_DN711_c7_g1;TRINITY_DN723_c1_g2;TRINITY_DN873_c1_g1;TRINITY_DN1000_c0_g1;TRINITY_DN1084_c1_g1;TRINITY_DN1182_c0_g1;TRINITY_DN1282_c5_g1;TRINITY_DN1429_c0_g2;TRINITY_DN1468_c3_g1;TRINITY_DN1523…
oxidoreductase activity	molecular_function	GO:0016491	314	TRINITY_DN7_c1_g3;TRINITY_DN38_c1_g1;TRINITY_DN224_c0_g1;TRINITY_DN224_c0_g2;TRINITY_DN257_c0_g1;TRINITY_DN363_c0_g1;TRINITY_DN332_c3_g1;TRINITY_DN491_c3_g2;TRINITY_DN490_c1_g2;TRINITY_DN490_c1_g1;TRINITY_DN490_c0_g1;TRINITY_DN671_c0_g1;TRINITY_DN779_c1_g3;TRINITY_DN779_c1_g2;TRINITY_DN779_c1_g1;TRINITY_DN961_c2_g1;TRINITY_DN925_c0_g1;TRINITY_DN946_c0_g1;TRINITY_DN1051_c2_g2;TRINITY_DN1097_c0_g1;…
regulation of potassium ion transmembrane transporter activity	biological_process	GO:1901016	313	TRINITY_DN55_c8_g1;TRINITY_DN194_c0_g2;TRINITY_DN186_c3_g1;TRINITY_DN242_c4_g1;TRINITY_DN381_c1_g4;TRINITY_DN344_c0_g1;TRINITY_DN426_c0_g4;TRINITY_DN586_c0_g4;TRINITY_DN598_c2_g1;TRINITY_DN779_c1_g3;TRINITY_DN711_c7_g1;TRINITY_DN723_c1_g2;TRINITY_DN873_c1_g1;TRINITY_DN1000_c0_g1;TRINITY_DN1084_c1_g1;TRINITY_DN1182_c0_g1;TRINITY_DN1282_c5_g1;TRINITY_DN1309_c0_g1;TRINITY_DN1429_c0_g2;TRINITY_DN1468…
negative regulation of sodium ion transmembrane transporter activity	biological_process	GO:2000650	312	TRINITY_DN55_c8_g1;TRINITY_DN194_c0_g2;TRINITY_DN186_c3_g1;TRINITY_DN242_c4_g1;TRINITY_DN381_c1_g4;TRINITY_DN344_c0_g1;TRINITY_DN426_c0_g4;TRINITY_DN586_c0_g4;TRINITY_DN598_c2_g1;TRINITY_DN779_c1_g3;TRINITY_DN711_c7_g1;TRINITY_DN723_c1_g2;TRINITY_DN873_c1_g1;TRINITY_DN1000_c0_g1;TRINITY_DN1084_c1_g1;TRINITY_DN1182_c0_g1;TRINITY_DN1282_c5_g1;TRINITY_DN1429_c0_g2;TRINITY_DN1468_c3_g1;TRINITY_DN1523…
basolateral plasma membrane	cellular_component	GO:0016323	311	TRINITY_DN39_c1_g2;TRINITY_DN78_c12_g1;TRINITY_DN157_c0_g1;TRINITY_DN271_c0_g2;TRINITY_DN231_c1_g1;TRINITY_DN293_c0_g1;TRINITY_DN264_c1_g1;TRINITY_DN352_c2_g1;TRINITY_DN378_c0_g1;TRINITY_DN378_c2_g1;TRINITY_DN580_c0_g1;TRINITY_DN674_c2_g1;TRINITY_DN613_c0_g1;TRINITY_DN613_c0_g3;TRINITY_DN686_c0_g1;TRINITY_DN665_c6_g1;TRINITY_DN760_c0_g1;TRINITY_DN739_c5_g1;TRINITY_DN716_c0_g1;TRINITY_DN867_c0_g2;…
glucocorticoid receptor signaling pathway	biological_process	GO:0042921	309	TRINITY_DN55_c8_g1;TRINITY_DN194_c0_g2;TRINITY_DN186_c3_g1;TRINITY_DN242_c4_g1;TRINITY_DN381_c1_g4;TRINITY_DN344_c0_g1;TRINITY_DN426_c0_g4;TRINITY_DN518_c2_g1;TRINITY_DN586_c0_g4;TRINITY_DN598_c2_g1;TRINITY_DN779_c1_g3;TRINITY_DN711_c7_g1;TRINITY_DN723_c1_g2;TRINITY_DN873_c1_g1;TRINITY_DN1000_c0_g1;TRINITY_DN1182_c0_g1;TRINITY_DN1282_c5_g1;TRINITY_DN1328_c0_g2;TRINITY_DN1429_c0_g2;TRINITY_DN1468_…
protein homooligomerization	biological_process	GO:0051260	308	TRINITY_DN86_c8_g1;TRINITY_DN71_c0_g2;TRINITY_DN123_c0_g1;TRINITY_DN109_c4_g1;TRINITY_DN110_c0_g1;TRINITY_DN235_c1_g1;TRINITY_DN234_c1_g1;TRINITY_DN234_c0_g1;TRINITY_DN234_c0_g2;TRINITY_DN234_c0_g3;TRINITY_DN319_c1_g1;TRINITY_DN305_c5_g1;TRINITY_DN426_c1_g1;TRINITY_DN519_c0_g1;TRINITY_DN538_c1_g2;TRINITY_DN525_c0_g1;TRINITY_DN604_c1_g1;TRINITY_DN732_c0_g1;TRINITY_DN703_c1_g1;TRINITY_DN826_c0_g1;T…
progesterone receptor signaling pathway	biological_process	GO:0050847	308	TRINITY_DN55_c8_g1;TRINITY_DN194_c0_g2;TRINITY_DN186_c3_g1;TRINITY_DN242_c4_g1;TRINITY_DN222_c0_g1;TRINITY_DN222_c0_g2;TRINITY_DN381_c1_g4;TRINITY_DN344_c0_g1;TRINITY_DN426_c0_g4;TRINITY_DN586_c0_g4;TRINITY_DN598_c2_g1;TRINITY_DN779_c1_g3;TRINITY_DN711_c7_g1;TRINITY_DN723_c1_g2;TRINITY_DN873_c1_g1;TRINITY_DN1000_c0_g1;TRINITY_DN1182_c0_g1;TRINITY_DN1282_c5_g1;TRINITY_DN1429_c0_g2;TRINITY_DN1468_c…
nuclear chromatin	cellular_component	GO:0000790	307	TRINITY_DN125_c3_g1;TRINITY_DN125_c3_g2;TRINITY_DN125_c1_g1;TRINITY_DN165_c1_g3;TRINITY_DN110_c4_g1;TRINITY_DN206_c0_g1;TRINITY_DN265_c0_g1;TRINITY_DN233_c0_g1;TRINITY_DN312_c2_g1;TRINITY_DN387_c0_g1;TRINITY_DN307_c1_g1;TRINITY_DN307_c2_g1;TRINITY_DN347_c1_g1;TRINITY_DN316_c0_g1;TRINITY_DN332_c4_g2;TRINITY_DN478_c1_g1;TRINITY_DN481_c1_g4;TRINITY_DN460_c0_g1;TRINITY_DN465_c0_g1;TRINITY_DN491_c3_g2…
cytoplasmic vesicle	cellular_component	GO:0031410	306	TRINITY_DN5_c0_g1;TRINITY_DN78_c6_g1;TRINITY_DN1_c1_g1;TRINITY_DN173_c0_g1;TRINITY_DN173_c6_g1;TRINITY_DN206_c0_g1;TRINITY_DN238_c1_g1;TRINITY_DN285_c0_g1;TRINITY_DN346_c1_g1;TRINITY_DN373_c0_g1;TRINITY_DN440_c1_g1;TRINITY_DN494_c2_g2;TRINITY_DN469_c1_g1;TRINITY_DN459_c0_g1;TRINITY_DN595_c1_g1;TRINITY_DN546_c3_g1;TRINITY_DN699_c0_g1;TRINITY_DN681_c0_g1;TRINITY_DN655_c1_g1;TRINITY_DN692_c0_g1;TRIN…
endocardial cushion development	biological_process	GO:0003197	306	TRINITY_DN55_c8_g1;TRINITY_DN194_c0_g2;TRINITY_DN186_c3_g1;TRINITY_DN242_c4_g1;TRINITY_DN381_c1_g4;TRINITY_DN344_c0_g1;TRINITY_DN426_c0_g4;TRINITY_DN586_c0_g4;TRINITY_DN598_c2_g1;TRINITY_DN779_c1_g3;TRINITY_DN711_c7_g1;TRINITY_DN723_c1_g2;TRINITY_DN873_c1_g1;TRINITY_DN1044_c0_g1;TRINITY_DN1000_c0_g1;TRINITY_DN1182_c0_g1;TRINITY_DN1282_c5_g1;TRINITY_DN1429_c0_g2;TRINITY_DN1468_c3_g1;TRINITY_DN1523…
transcription corepressor activity	molecular_function	GO:0003714	305	TRINITY_DN85_c1_g1;TRINITY_DN52_c0_g2;TRINITY_DN46_c3_g1;TRINITY_DN97_c4_g1;TRINITY_DN22_c1_g2;TRINITY_DN43_c0_g1;TRINITY_DN75_c1_g2;TRINITY_DN114_c1_g1;TRINITY_DN204_c0_g1;TRINITY_DN396_c0_g1;TRINITY_DN329_c0_g1;TRINITY_DN346_c0_g2;TRINITY_DN381_c1_g2;TRINITY_DN354_c0_g2;TRINITY_DN306_c1_g1;TRINITY_DN494_c0_g2;TRINITY_DN443_c0_g1;TRINITY_DN508_c0_g3;TRINITY_DN517_c0_g1;TRINITY_DN665_c1_g1;TRINIT…
heme binding	molecular_function	GO:0020037	305	TRINITY_DN93_c4_g1;TRINITY_DN11_c2_g1;TRINITY_DN189_c1_g1;TRINITY_DN253_c0_g1;TRINITY_DN452_c1_g1;TRINITY_DN663_c2_g1;TRINITY_DN663_c6_g1;TRINITY_DN636_c1_g2;TRINITY_DN636_c1_g1;TRINITY_DN783_c2_g1;TRINITY_DN734_c0_g1;TRINITY_DN813_c0_g1;TRINITY_DN935_c2_g1;TRINITY_DN1131_c0_g1;TRINITY_DN1215_c4_g1;TRINITY_DN1215_c1_g1;TRINITY_DN1215_c0_g1;TRINITY_DN1482_c2_g1;TRINITY_DN1995_c4_g1;TRINITY_DN1933_…
aging	biological_process	GO:0007568	304	TRINITY_DN38_c1_g1;TRINITY_DN98_c1_g1;TRINITY_DN49_c2_g1;TRINITY_DN13_c0_g1;TRINITY_DN28_c0_g3;TRINITY_DN25_c0_g1;TRINITY_DN125_c2_g1;TRINITY_DN183_c1_g1;TRINITY_DN171_c0_g1;TRINITY_DN156_c1_g2;TRINITY_DN205_c2_g1;TRINITY_DN253_c0_g1;TRINITY_DN385_c0_g1;TRINITY_DN378_c0_g1;TRINITY_DN560_c2_g1;TRINITY_DN663_c12_g1;TRINITY_DN653_c1_g2;TRINITY_DN760_c4_g1;TRINITY_DN734_c0_g1;TRINITY_DN884_c0_g1;TRIN…
G-protein coupled receptor activity	molecular_function	GO:0004930	304	TRINITY_DN240_c0_g1;TRINITY_DN263_c2_g1;TRINITY_DN204_c1_g1;TRINITY_DN301_c0_g1;TRINITY_DN465_c4_g1;TRINITY_DN491_c5_g1;TRINITY_DN490_c1_g2;TRINITY_DN504_c1_g3;TRINITY_DN504_c1_g1;TRINITY_DN582_c0_g2;TRINITY_DN861_c2_g2;TRINITY_DN861_c2_g1;TRINITY_DN972_c0_g1;TRINITY_DN964_c0_g1;TRINITY_DN949_c1_g1;TRINITY_DN1058_c1_g1;TRINITY_DN1092_c0_g3;TRINITY_DN1183_c0_g1;TRINITY_DN1105_c0_g1;TRINITY_DN1158_…
epidermal growth factor receptor signaling pathway	biological_process	GO:0007173	303	TRINITY_DN54_c0_g1;TRINITY_DN86_c2_g1;TRINITY_DN86_c3_g1;TRINITY_DN86_c3_g3;TRINITY_DN86_c3_g2;TRINITY_DN86_c1_g1;TRINITY_DN25_c0_g1;TRINITY_DN127_c0_g5;TRINITY_DN152_c0_g2;TRINITY_DN181_c0_g1;TRINITY_DN288_c6_g1;TRINITY_DN203_c0_g2;TRINITY_DN203_c0_g3;TRINITY_DN264_c0_g1;TRINITY_DN387_c4_g1;TRINITY_DN306_c1_g1;TRINITY_DN351_c1_g1;TRINITY_DN339_c1_g1;TRINITY_DN348_c0_g1;TRINITY_DN408_c0_g1;TRINIT…
regulation of synapse organization	biological_process	GO:0050807	302	TRINITY_DN55_c8_g1;TRINITY_DN194_c0_g2;TRINITY_DN186_c3_g1;TRINITY_DN242_c4_g1;TRINITY_DN381_c1_g4;TRINITY_DN344_c0_g1;TRINITY_DN426_c0_g4;TRINITY_DN586_c0_g4;TRINITY_DN598_c2_g1;TRINITY_DN779_c1_g3;TRINITY_DN711_c7_g1;TRINITY_DN723_c1_g2;TRINITY_DN873_c1_g1;TRINITY_DN1000_c0_g1;TRINITY_DN1182_c0_g1;TRINITY_DN1282_c5_g1;TRINITY_DN1429_c0_g2;TRINITY_DN1468_c3_g1;TRINITY_DN1515_c0_g1;TRINITY_DN1515…
transcriptional activator activity, RNA polymerase II core promoter proximal region sequence-specific binding	molecular_function	GO:0001077	302	TRINITY_DN75_c1_g2;TRINITY_DN189_c0_g1;TRINITY_DN195_c1_g1;TRINITY_DN110_c4_g1;TRINITY_DN121_c0_g1;TRINITY_DN230_c1_g5;TRINITY_DN265_c0_g1;TRINITY_DN265_c0_g2;TRINITY_DN276_c0_g1;TRINITY_DN220_c2_g1;TRINITY_DN354_c0_g1;TRINITY_DN354_c0_g2;TRINITY_DN319_c0_g2;TRINITY_DN322_c3_g1;TRINITY_DN332_c4_g2;TRINITY_DN328_c2_g2;TRINITY_DN477_c1_g2;TRINITY_DN460_c0_g1;TRINITY_DN484_c0_g1;TRINITY_DN583_c0_g1;…
negative regulation of sodium ion transport	biological_process	GO:0010766	302	TRINITY_DN55_c8_g1;TRINITY_DN194_c0_g2;TRINITY_DN186_c3_g1;TRINITY_DN242_c4_g1;TRINITY_DN381_c1_g4;TRINITY_DN315_c0_g2;TRINITY_DN344_c0_g1;TRINITY_DN426_c0_g4;TRINITY_DN586_c0_g4;TRINITY_DN598_c2_g1;TRINITY_DN779_c1_g3;TRINITY_DN711_c7_g1;TRINITY_DN723_c1_g2;TRINITY_DN873_c1_g1;TRINITY_DN1000_c0_g1;TRINITY_DN1084_c1_g1;TRINITY_DN1182_c0_g1;TRINITY_DN1282_c5_g1;TRINITY_DN1429_c0_g2;TRINITY_DN1468_…
extracellular matrix organization	biological_process	GO:0030198	301	TRINITY_DN38_c0_g2;TRINITY_DN86_c9_g2;TRINITY_DN13_c0_g2;TRINITY_DN67_c0_g1;TRINITY_DN184_c1_g1;TRINITY_DN172_c1_g2;TRINITY_DN226_c0_g1;TRINITY_DN205_c0_g1;TRINITY_DN205_c2_g1;TRINITY_DN221_c0_g1;TRINITY_DN289_c0_g1;TRINITY_DN289_c0_g3;TRINITY_DN321_c0_g1;TRINITY_DN471_c0_g1;TRINITY_DN427_c0_g1;TRINITY_DN459_c0_g1;TRINITY_DN580_c0_g1;TRINITY_DN563_c0_g1;TRINITY_DN634_c0_g1;TRINITY_DN680_c0_g1;TRI…
endocytosis	biological_process	GO:0006897	300	TRINITY_DN17_c0_g3;TRINITY_DN78_c0_g2;TRINITY_DN99_c2_g1;TRINITY_DN192_c2_g1;TRINITY_DN122_c1_g1;TRINITY_DN124_c0_g1;TRINITY_DN219_c3_g1;TRINITY_DN258_c3_g1;TRINITY_DN200_c1_g1;TRINITY_DN288_c6_g1;TRINITY_DN203_c0_g3;TRINITY_DN344_c0_g1;TRINITY_DN408_c0_g1;TRINITY_DN469_c1_g1;TRINITY_DN423_c0_g1;TRINITY_DN447_c0_g1;TRINITY_DN447_c0_g2;TRINITY_DN514_c0_g4;TRINITY_DN572_c0_g1;TRINITY_DN665_c4_g1;TR…
antigen binding	molecular_function	GO:0003823	299	TRINITY_DN45_c0_g1;TRINITY_DN501_c0_g1;TRINITY_DN1299_c0_g4;TRINITY_DN1299_c2_g1;TRINITY_DN1299_c0_g1;TRINITY_DN1299_c0_g2;TRINITY_DN1299_c0_g3;TRINITY_DN1391_c1_g2;TRINITY_DN1391_c1_g1;TRINITY_DN1391_c0_g1;TRINITY_DN1391_c0_g2;TRINITY_DN1313_c2_g2;TRINITY_DN1313_c1_g1;TRINITY_DN1313_c2_g1;TRINITY_DN1313_c0_g1;TRINITY_DN1793_c1_g1;TRINITY_DN1926_c0_g1;TRINITY_DN1926_c0_g2;TRINITY_DN2365_c2_g1;TRI…
phosphoserine binding	molecular_function	GO:0050815	298	TRINITY_DN55_c8_g1;TRINITY_DN194_c0_g2;TRINITY_DN186_c3_g1;TRINITY_DN242_c4_g1;TRINITY_DN381_c1_g4;TRINITY_DN306_c1_g1;TRINITY_DN344_c0_g1;TRINITY_DN426_c0_g4;TRINITY_DN586_c0_g4;TRINITY_DN598_c2_g1;TRINITY_DN779_c1_g3;TRINITY_DN711_c7_g1;TRINITY_DN723_c1_g2;TRINITY_DN873_c1_g1;TRINITY_DN1000_c0_g1;TRINITY_DN1182_c0_g1;TRINITY_DN1282_c5_g1;TRINITY_DN1429_c0_g2;TRINITY_DN1468_c3_g1;TRINITY_DN1523_…
phosphothreonine binding	molecular_function	GO:0050816	297	TRINITY_DN55_c8_g1;TRINITY_DN194_c0_g2;TRINITY_DN186_c3_g1;TRINITY_DN242_c4_g1;TRINITY_DN381_c1_g4;TRINITY_DN344_c0_g1;TRINITY_DN426_c0_g4;TRINITY_DN586_c0_g4;TRINITY_DN598_c2_g1;TRINITY_DN779_c1_g3;TRINITY_DN711_c7_g1;TRINITY_DN723_c1_g2;TRINITY_DN873_c1_g1;TRINITY_DN1000_c0_g1;TRINITY_DN1182_c0_g1;TRINITY_DN1282_c5_g1;TRINITY_DN1429_c0_g2;TRINITY_DN1468_c3_g1;TRINITY_DN1523_c0_g2;TRINITY_DN1532…
actin cytoskeleton organization	biological_process	GO:0030036	297	TRINITY_DN21_c0_g1;TRINITY_DN72_c2_g2;TRINITY_DN65_c0_g1;TRINITY_DN65_c0_g2;TRINITY_DN65_c0_g3;TRINITY_DN75_c0_g1;TRINITY_DN192_c0_g4;TRINITY_DN192_c0_g5;TRINITY_DN112_c0_g1;TRINITY_DN214_c0_g1;TRINITY_DN200_c0_g1;TRINITY_DN275_c1_g2;TRINITY_DN312_c0_g1;TRINITY_DN387_c4_g1;TRINITY_DN337_c0_g1;TRINITY_DN337_c0_g2;TRINITY_DN337_c0_g3;TRINITY_DN367_c0_g1;TRINITY_DN324_c0_g1;TRINITY_DN315_c0_g2;TRINI…
negative regulation of transcription from RNA polymerase II promoter in response to UV-induced DNA damage	biological_process	GO:0010768	296	TRINITY_DN55_c8_g1;TRINITY_DN194_c0_g2;TRINITY_DN186_c3_g1;TRINITY_DN242_c4_g1;TRINITY_DN381_c1_g4;TRINITY_DN344_c0_g1;TRINITY_DN426_c0_g4;TRINITY_DN586_c0_g4;TRINITY_DN598_c2_g1;TRINITY_DN779_c1_g3;TRINITY_DN711_c7_g1;TRINITY_DN723_c1_g2;TRINITY_DN873_c1_g1;TRINITY_DN1000_c0_g1;TRINITY_DN1182_c0_g1;TRINITY_DN1282_c5_g1;TRINITY_DN1429_c0_g2;TRINITY_DN1468_c3_g1;TRINITY_DN1523_c0_g2;TRINITY_DN1532…
positive regulation of nucleocytoplasmic transport	biological_process	GO:0046824	296	TRINITY_DN55_c8_g1;TRINITY_DN194_c0_g2;TRINITY_DN186_c3_g1;TRINITY_DN242_c4_g1;TRINITY_DN381_c1_g4;TRINITY_DN344_c0_g1;TRINITY_DN426_c0_g4;TRINITY_DN586_c0_g4;TRINITY_DN598_c2_g1;TRINITY_DN779_c1_g3;TRINITY_DN711_c7_g1;TRINITY_DN723_c1_g2;TRINITY_DN873_c1_g1;TRINITY_DN1000_c0_g1;TRINITY_DN1182_c0_g1;TRINITY_DN1282_c5_g1;TRINITY_DN1429_c0_g2;TRINITY_DN1468_c3_g1;TRINITY_DN1523_c0_g2;TRINITY_DN1532…
development involved in symbiotic interaction	biological_process	GO:0044111	296	TRINITY_DN55_c8_g1;TRINITY_DN194_c0_g2;TRINITY_DN186_c3_g1;TRINITY_DN242_c4_g1;TRINITY_DN381_c1_g4;TRINITY_DN344_c0_g1;TRINITY_DN426_c0_g4;TRINITY_DN586_c0_g4;TRINITY_DN598_c2_g1;TRINITY_DN779_c1_g3;TRINITY_DN711_c7_g1;TRINITY_DN723_c1_g2;TRINITY_DN873_c1_g1;TRINITY_DN1000_c0_g1;TRINITY_DN1182_c0_g1;TRINITY_DN1282_c5_g1;TRINITY_DN1429_c0_g2;TRINITY_DN1468_c3_g1;TRINITY_DN1523_c0_g2;TRINITY_DN1532…
transmission of virus	biological_process	GO:0019089	296	TRINITY_DN55_c8_g1;TRINITY_DN194_c0_g2;TRINITY_DN186_c3_g1;TRINITY_DN242_c4_g1;TRINITY_DN381_c1_g4;TRINITY_DN344_c0_g1;TRINITY_DN426_c0_g4;TRINITY_DN586_c0_g4;TRINITY_DN598_c2_g1;TRINITY_DN779_c1_g3;TRINITY_DN711_c7_g1;TRINITY_DN723_c1_g2;TRINITY_DN873_c1_g1;TRINITY_DN1000_c0_g1;TRINITY_DN1182_c0_g1;TRINITY_DN1282_c5_g1;TRINITY_DN1429_c0_g2;TRINITY_DN1468_c3_g1;TRINITY_DN1523_c0_g2;TRINITY_DN1532…
vesicle-mediated transport	biological_process	GO:0016192	295	TRINITY_DN50_c1_g1;TRINITY_DN98_c0_g1;TRINITY_DN143_c0_g1;TRINITY_DN125_c0_g1;TRINITY_DN195_c1_g1;TRINITY_DN144_c0_g1;TRINITY_DN124_c0_g1;TRINITY_DN172_c1_g1;TRINITY_DN249_c0_g1;TRINITY_DN214_c0_g2;TRINITY_DN284_c0_g1;TRINITY_DN265_c2_g1;TRINITY_DN275_c1_g2;TRINITY_DN281_c0_g1;TRINITY_DN312_c1_g2;TRINITY_DN312_c1_g1;TRINITY_DN319_c1_g2;TRINITY_DN319_c1_g1;TRINITY_DN306_c2_g1;TRINITY_DN322_c0_g1;T…
oxidation-reduction process	biological_process	GO:0055114	295	TRINITY_DN93_c0_g2;TRINITY_DN89_c0_g2;TRINITY_DN38_c1_g1;TRINITY_DN11_c2_g1;TRINITY_DN33_c1_g1;TRINITY_DN189_c1_g1;TRINITY_DN302_c0_g1;TRINITY_DN316_c2_g1;TRINITY_DN444_c1_g1;TRINITY_DN452_c1_g1;TRINITY_DN583_c1_g1;TRINITY_DN588_c0_g1;TRINITY_DN603_c2_g2;TRINITY_DN603_c2_g1;TRINITY_DN864_c1_g1;TRINITY_DN935_c2_g1;TRINITY_DN961_c2_g1;TRINITY_DN989_c2_g1;TRINITY_DN946_c2_g3;TRINITY_DN1006_c0_g2;TRI…
postsynaptic membrane	cellular_component	GO:0045211	294	TRINITY_DN48_c1_g1;TRINITY_DN152_c0_g2;TRINITY_DN152_c0_g3;TRINITY_DN172_c0_g1;TRINITY_DN182_c0_g1;TRINITY_DN249_c0_g1;TRINITY_DN205_c2_g1;TRINITY_DN234_c1_g1;TRINITY_DN231_c0_g1;TRINITY_DN299_c0_g1;TRINITY_DN312_c1_g2;TRINITY_DN312_c1_g1;TRINITY_DN467_c0_g1;TRINITY_DN492_c0_g2;TRINITY_DN447_c0_g2;TRINITY_DN512_c0_g4;TRINITY_DN512_c0_g3;TRINITY_DN501_c3_g1;TRINITY_DN509_c3_g2;TRINITY_DN558_c5_g1;…
cytoplasmic, membrane-bounded vesicle	cellular_component	GO:0016023	293	TRINITY_DN86_c3_g1;TRINITY_DN86_c3_g3;TRINITY_DN86_c3_g4;TRINITY_DN143_c0_g1;TRINITY_DN161_c0_g1;TRINITY_DN109_c0_g1;TRINITY_DN258_c3_g1;TRINITY_DN297_c4_g1;TRINITY_DN387_c4_g1;TRINITY_DN319_c1_g2;TRINITY_DN373_c0_g1;TRINITY_DN350_c0_g1;TRINITY_DN420_c1_g1;TRINITY_DN514_c0_g4;TRINITY_DN505_c0_g1;TRINITY_DN631_c0_g1;TRINITY_DN655_c1_g1;TRINITY_DN626_c0_g1;TRINITY_DN767_c0_g1;TRINITY_DN767_c0_g2;TR…
mRNA splicing, via spliceosome	biological_process	GO:0000398	293	TRINITY_DN55_c3_g2;TRINITY_DN74_c1_g1;TRINITY_DN86_c2_g1;TRINITY_DN125_c14_g1;TRINITY_DN165_c0_g2;TRINITY_DN209_c0_g2;TRINITY_DN291_c1_g1;TRINITY_DN288_c2_g1;TRINITY_DN257_c2_g1;TRINITY_DN387_c3_g1;TRINITY_DN331_c0_g1;TRINITY_DN331_c0_g2;TRINITY_DN331_c0_g3;TRINITY_DN316_c0_g1;TRINITY_DN319_c2_g1;TRINITY_DN408_c0_g1;TRINITY_DN404_c0_g1;TRINITY_DN443_c0_g1;TRINITY_DN544_c0_g2;TRINITY_DN544_c0_g3;T…
trans-Golgi network	cellular_component	GO:0005802	293	TRINITY_DN46_c0_g3;TRINITY_DN98_c0_g1;TRINITY_DN1_c1_g1;TRINITY_DN125_c0_g1;TRINITY_DN144_c0_g1;TRINITY_DN135_c0_g1;TRINITY_DN205_c0_g1;TRINITY_DN306_c2_g1;TRINITY_DN322_c2_g1;TRINITY_DN339_c1_g1;TRINITY_DN493_c0_g1;TRINITY_DN434_c0_g2;TRINITY_DN447_c0_g2;TRINITY_DN585_c1_g2;TRINITY_DN582_c0_g2;TRINITY_DN564_c0_g1;TRINITY_DN564_c0_g2;TRINITY_DN592_c3_g1;TRINITY_DN690_c0_g1;TRINITY_DN690_c0_g2;TRI…
microtubule cytoskeleton	cellular_component	GO:0015630	291	TRINITY_DN54_c0_g1;TRINITY_DN83_c0_g1;TRINITY_DN196_c0_g2;TRINITY_DN188_c0_g2;TRINITY_DN187_c0_g1;TRINITY_DN236_c0_g1;TRINITY_DN378_c2_g1;TRINITY_DN322_c2_g1;TRINITY_DN373_c0_g1;TRINITY_DN348_c0_g1;TRINITY_DN356_c0_g2;TRINITY_DN449_c0_g1;TRINITY_DN482_c0_g1;TRINITY_DN414_c1_g1;TRINITY_DN485_c0_g1;TRINITY_DN428_c1_g1;TRINITY_DN665_c0_g3;TRINITY_DN605_c2_g1;TRINITY_DN620_c0_g1;TRINITY_DN783_c1_g1;T…
cilium	cellular_component	GO:0005929	290	TRINITY_DN93_c8_g1;TRINITY_DN83_c0_g1;TRINITY_DN62_c2_g1;TRINITY_DN143_c0_g1;TRINITY_DN188_c0_g2;TRINITY_DN159_c0_g2;TRINITY_DN146_c1_g1;TRINITY_DN279_c1_g1;TRINITY_DN263_c2_g1;TRINITY_DN389_c0_g1;TRINITY_DN552_c3_g1;TRINITY_DN684_c1_g1;TRINITY_DN622_c2_g1;TRINITY_DN784_c0_g1;TRINITY_DN789_c0_g1;TRINITY_DN744_c0_g1;TRINITY_DN871_c1_g1;TRINITY_DN866_c0_g1;TRINITY_DN844_c0_g1;TRINITY_DN801_c0_g1;TR…
homophilic cell adhesion via plasma membrane adhesion molecules	biological_process	GO:0007156	289	TRINITY_DN152_c0_g2;TRINITY_DN152_c0_g3;TRINITY_DN172_c0_g1;TRINITY_DN178_c0_g1;TRINITY_DN301_c0_g1;TRINITY_DN441_c2_g2;TRINITY_DN441_c2_g1;TRINITY_DN508_c4_g1;TRINITY_DN676_c1_g1;TRINITY_DN757_c3_g1;TRINITY_DN964_c0_g1;TRINITY_DN1358_c0_g1;TRINITY_DN1348_c1_g1;TRINITY_DN1515_c0_g1;TRINITY_DN1515_c0_g2;TRINITY_DN1563_c2_g1;TRINITY_DN1574_c0_g1;TRINITY_DN1574_c4_g1;TRINITY_DN1574_c1_g2;TRINITY_DN1…
nuclear envelope	cellular_component	GO:0005635	287	TRINITY_DN74_c0_g1;TRINITY_DN74_c0_g2;TRINITY_DN74_c0_g3;TRINITY_DN49_c4_g1;TRINITY_DN125_c2_g1;TRINITY_DN119_c0_g1;TRINITY_DN101_c0_g1;TRINITY_DN147_c1_g1;TRINITY_DN182_c0_g1;TRINITY_DN197_c1_g1;TRINITY_DN330_c0_g1;TRINITY_DN342_c0_g1;TRINITY_DN483_c0_g1;TRINITY_DN482_c1_g2;TRINITY_DN472_c0_g2;TRINITY_DN472_c0_g3;TRINITY_DN623_c3_g2;TRINITY_DN661_c0_g1;TRINITY_DN747_c0_g1;TRINITY_DN734_c0_g1;TRI…
response to lipopolysaccharide	biological_process	GO:0032496	287	TRINITY_DN35_c0_g1;TRINITY_DN47_c0_g1;TRINITY_DN83_c1_g1;TRINITY_DN15_c0_g1;TRINITY_DN49_c1_g1;TRINITY_DN11_c0_g1;TRINITY_DN153_c1_g1;TRINITY_DN125_c1_g1;TRINITY_DN265_c0_g1;TRINITY_DN204_c1_g1;TRINITY_DN307_c2_g1;TRINITY_DN460_c0_g1;TRINITY_DN455_c2_g1;TRINITY_DN583_c0_g1;TRINITY_DN645_c0_g1;TRINITY_DN645_c0_g2;TRINITY_DN663_c12_g1;TRINITY_DN739_c1_g1;TRINITY_DN791_c0_g1;TRINITY_DN742_c1_g1;TRIN…
endosome membrane	cellular_component	GO:0010008	286	TRINITY_DN21_c0_g1;TRINITY_DN83_c1_g1;TRINITY_DN86_c2_g1;TRINITY_DN98_c0_g1;TRINITY_DN0_c5_g1;TRINITY_DN1_c3_g1;TRINITY_DN1_c3_g2;TRINITY_DN87_c0_g4;TRINITY_DN87_c0_g1;TRINITY_DN87_c0_g2;TRINITY_DN25_c0_g1;TRINITY_DN125_c0_g1;TRINITY_DN144_c0_g1;TRINITY_DN145_c0_g1;TRINITY_DN217_c1_g1;TRINITY_DN337_c1_g1;TRINITY_DN372_c1_g1;TRINITY_DN493_c0_g1;TRINITY_DN505_c0_g1;TRINITY_DN570_c0_g1;TRINITY_DN570…
insulin receptor signaling pathway	biological_process	GO:0008286	284	TRINITY_DN70_c0_g2;TRINITY_DN54_c0_g1;TRINITY_DN10_c3_g1;TRINITY_DN86_c2_g1;TRINITY_DN86_c3_g1;TRINITY_DN86_c3_g3;TRINITY_DN86_c3_g2;TRINITY_DN86_c1_g1;TRINITY_DN75_c0_g1;TRINITY_DN25_c0_g1;TRINITY_DN196_c0_g2;TRINITY_DN164_c1_g1;TRINITY_DN223_c0_g1;TRINITY_DN223_c0_g2;TRINITY_DN288_c6_g1;TRINITY_DN203_c0_g2;TRINITY_DN203_c0_g3;TRINITY_DN302_c0_g1;TRINITY_DN306_c1_g1;TRINITY_DN351_c1_g1;TRINITY_D…
regulation of gene expression	biological_process	GO:0010468	282	TRINITY_DN70_c2_g1;TRINITY_DN86_c3_g4;TRINITY_DN13_c2_g1;TRINITY_DN143_c0_g1;TRINITY_DN132_c0_g2;TRINITY_DN165_c0_g1;TRINITY_DN270_c0_g1;TRINITY_DN205_c2_g1;TRINITY_DN203_c1_g1;TRINITY_DN396_c2_g2;TRINITY_DN387_c0_g1;TRINITY_DN387_c2_g1;TRINITY_DN319_c1_g2;TRINITY_DN319_c2_g1;TRINITY_DN332_c1_g3;TRINITY_DN412_c0_g1;TRINITY_DN481_c1_g4;TRINITY_DN453_c0_g2;TRINITY_DN463_c0_g1;TRINITY_DN552_c1_g2;TR…
post-translational protein modification	biological_process	GO:0043687	281	TRINITY_DN39_c1_g1;TRINITY_DN50_c1_g1;TRINITY_DN31_c0_g1;TRINITY_DN75_c0_g1;TRINITY_DN115_c1_g3;TRINITY_DN134_c1_g1;TRINITY_DN223_c2_g1;TRINITY_DN267_c2_g4;TRINITY_DN203_c1_g1;TRINITY_DN352_c3_g1;TRINITY_DN330_c0_g1;TRINITY_DN378_c0_g1;TRINITY_DN494_c0_g2;TRINITY_DN482_c1_g2;TRINITY_DN434_c0_g2;TRINITY_DN459_c2_g1;TRINITY_DN623_c3_g2;TRINITY_DN792_c1_g2;TRINITY_DN780_c0_g1;TRINITY_DN724_c3_g1;TRI…
chromatin modification	biological_process	GO:0016568	281	TRINITY_DN85_c5_g1;TRINITY_DN60_c0_g1;TRINITY_DN0_c13_g1;TRINITY_DN76_c0_g4;TRINITY_DN259_c0_g6;TRINITY_DN259_c0_g1;TRINITY_DN203_c1_g1;TRINITY_DN366_c0_g1;TRINITY_DN329_c0_g1;TRINITY_DN307_c2_g1;TRINITY_DN303_c0_g1;TRINITY_DN426_c1_g1;TRINITY_DN414_c0_g2;TRINITY_DN561_c4_g1;TRINITY_DN591_c1_g1;TRINITY_DN586_c0_g5;TRINITY_DN586_c0_g1;TRINITY_DN520_c0_g1;TRINITY_DN659_c0_g1;TRINITY_DN703_c1_g1;TRI…
fibroblast growth factor receptor signaling pathway	biological_process	GO:0008543	279	TRINITY_DN54_c0_g1;TRINITY_DN86_c2_g1;TRINITY_DN86_c3_g1;TRINITY_DN86_c3_g3;TRINITY_DN86_c3_g2;TRINITY_DN86_c3_g4;TRINITY_DN86_c1_g1;TRINITY_DN153_c1_g1;TRINITY_DN152_c0_g2;TRINITY_DN181_c0_g1;TRINITY_DN203_c0_g2;TRINITY_DN203_c0_g3;TRINITY_DN264_c0_g1;TRINITY_DN387_c2_g1;TRINITY_DN306_c1_g1;TRINITY_DN351_c1_g1;TRINITY_DN348_c0_g1;TRINITY_DN426_c0_g2;TRINITY_DN426_c0_g3;TRINITY_DN475_c10_g1;TRINI…
receptor-mediated endocytosis	biological_process	GO:0006898	277	TRINITY_DN68_c1_g1;TRINITY_DN98_c1_g1;TRINITY_DN132_c0_g2;TRINITY_DN122_c1_g1;TRINITY_DN108_c0_g1;TRINITY_DN298_c0_g1;TRINITY_DN251_c3_g1;TRINITY_DN393_c0_g1;TRINITY_DN312_c1_g2;TRINITY_DN312_c1_g1;TRINITY_DN447_c0_g1;TRINITY_DN447_c0_g2;TRINITY_DN505_c0_g1;TRINITY_DN555_c0_g1;TRINITY_DN555_c0_g2;TRINITY_DN708_c0_g1;TRINITY_DN725_c1_g1;TRINITY_DN825_c0_g2;TRINITY_DN950_c0_g1;TRINITY_DN921_c0_g2;T…
midbody	cellular_component	GO:0030496	275	TRINITY_DN78_c12_g1;TRINITY_DN65_c3_g1;TRINITY_DN8_c1_g1;TRINITY_DN22_c0_g3;TRINITY_DN49_c2_g1;TRINITY_DN103_c1_g1;TRINITY_DN183_c1_g1;TRINITY_DN195_c0_g1;TRINITY_DN181_c0_g1;TRINITY_DN178_c2_g1;TRINITY_DN277_c0_g2;TRINITY_DN352_c0_g2;TRINITY_DN375_c0_g1;TRINITY_DN311_c0_g1;TRINITY_DN350_c0_g1;TRINITY_DN477_c0_g3;TRINITY_DN458_c2_g1;TRINITY_DN447_c0_g2;TRINITY_DN601_c2_g1;TRINITY_DN626_c0_g1;TRIN…
protein polyubiquitination	biological_process	GO:0000209	272	TRINITY_DN77_c0_g1;TRINITY_DN192_c1_g4;TRINITY_DN133_c1_g1;TRINITY_DN111_c2_g1;TRINITY_DN222_c0_g1;TRINITY_DN222_c0_g2;TRINITY_DN264_c2_g2;TRINITY_DN346_c1_g1;TRINITY_DN332_c1_g1;TRINITY_DN333_c0_g1;TRINITY_DN405_c1_g1;TRINITY_DN577_c0_g1;TRINITY_DN554_c0_g1;TRINITY_DN548_c5_g2;TRINITY_DN552_c1_g2;TRINITY_DN682_c1_g2;TRINITY_DN693_c0_g1;TRINITY_DN649_c12_g1;TRINITY_DN653_c1_g2;TRINITY_DN825_c1_g1…
DNA replication	biological_process	GO:0006260	271	TRINITY_DN14_c0_g1;TRINITY_DN136_c0_g1;TRINITY_DN378_c1_g1;TRINITY_DN326_c0_g1;TRINITY_DN303_c0_g1;TRINITY_DN498_c0_g2;TRINITY_DN454_c0_g1;TRINITY_DN591_c1_g1;TRINITY_DN586_c1_g1;TRINITY_DN675_c2_g1;TRINITY_DN697_c0_g1;TRINITY_DN795_c0_g1;TRINITY_DN814_c3_g1;TRINITY_DN942_c1_g1;TRINITY_DN942_c2_g1;TRINITY_DN1041_c0_g1;TRINITY_DN1041_c0_g2;TRINITY_DN1042_c0_g1;TRINITY_DN1145_c0_g1;TRINITY_DN1136_c…
positive regulation of protein phosphorylation	biological_process	GO:0001934	270	TRINITY_DN26_c0_g2;TRINITY_DN164_c1_g1;TRINITY_DN172_c0_g1;TRINITY_DN255_c8_g1;TRINITY_DN240_c0_g1;TRINITY_DN217_c0_g3;TRINITY_DN203_c0_g3;TRINITY_DN277_c0_g1;TRINITY_DN277_c0_g2;TRINITY_DN329_c0_g1;TRINITY_DN337_c1_g1;TRINITY_DN354_c6_g1;TRINITY_DN373_c0_g1;TRINITY_DN362_c0_g1;TRINITY_DN477_c0_g3;TRINITY_DN427_c0_g1;TRINITY_DN512_c0_g3;TRINITY_DN562_c1_g2;TRINITY_DN521_c0_g1;TRINITY_DN675_c0_g1;…
transporter activity	molecular_function	GO:0005215	270	TRINITY_DN83_c1_g1;TRINITY_DN42_c1_g1;TRINITY_DN111_c1_g1;TRINITY_DN144_c0_g1;TRINITY_DN241_c2_g1;TRINITY_DN392_c1_g1;TRINITY_DN582_c0_g2;TRINITY_DN677_c1_g1;TRINITY_DN775_c0_g2;TRINITY_DN854_c0_g2;TRINITY_DN1205_c5_g1;TRINITY_DN1377_c0_g1;TRINITY_DN1392_c11_g1;TRINITY_DN1556_c0_g1;TRINITY_DN1752_c1_g1;TRINITY_DN1986_c0_g1;TRINITY_DN2018_c6_g2;TRINITY_DN2185_c2_g1;TRINITY_DN2156_c0_g1;TRINITY_DN2…
peptidyl-serine phosphorylation	biological_process	GO:0018105	268	TRINITY_DN35_c0_g1;TRINITY_DN196_c0_g1;TRINITY_DN196_c0_g2;TRINITY_DN270_c0_g1;TRINITY_DN283_c0_g1;TRINITY_DN333_c0_g1;TRINITY_DN356_c0_g1;TRINITY_DN466_c2_g1;TRINITY_DN494_c1_g1;TRINITY_DN415_c2_g2;TRINITY_DN502_c0_g1;TRINITY_DN631_c0_g1;TRINITY_DN626_c0_g1;TRINITY_DN641_c0_g1;TRINITY_DN703_c1_g1;TRINITY_DN779_c2_g1;TRINITY_DN780_c5_g1;TRINITY_DN745_c1_g2;TRINITY_DN745_c1_g1;TRINITY_DN745_c1_g4;…
MAPK cascade	biological_process	GO:0000165	268	TRINITY_DN54_c0_g1;TRINITY_DN35_c0_g1;TRINITY_DN83_c1_g1;TRINITY_DN86_c2_g1;TRINITY_DN86_c3_g1;TRINITY_DN86_c3_g3;TRINITY_DN86_c3_g2;TRINITY_DN86_c1_g1;TRINITY_DN25_c0_g1;TRINITY_DN176_c0_g1;TRINITY_DN203_c0_g2;TRINITY_DN203_c0_g3;TRINITY_DN231_c0_g1;TRINITY_DN306_c1_g1;TRINITY_DN351_c1_g1;TRINITY_DN348_c0_g1;TRINITY_DN333_c0_g1;TRINITY_DN333_c1_g1;TRINITY_DN475_c10_g1;TRINITY_DN538_c1_g1;TRINITY…
postsynaptic density	cellular_component	GO:0014069	265	TRINITY_DN8_c1_g1;TRINITY_DN151_c2_g3;TRINITY_DN172_c0_g1;TRINITY_DN182_c0_g1;TRINITY_DN200_c0_g1;TRINITY_DN263_c2_g1;TRINITY_DN231_c0_g1;TRINITY_DN299_c0_g1;TRINITY_DN447_c0_g2;TRINITY_DN486_c1_g1;TRINITY_DN519_c0_g1;TRINITY_DN512_c0_g4;TRINITY_DN501_c3_g1;TRINITY_DN509_c3_g2;TRINITY_DN572_c1_g1;TRINITY_DN619_c1_g1;TRINITY_DN760_c4_g1;TRINITY_DN739_c1_g1;TRINITY_DN776_c1_g1;TRINITY_DN769_c0_g1;T…
transcription initiation from RNA polymerase II promoter	biological_process	GO:0006367	265	TRINITY_DN55_c3_g2;TRINITY_DN62_c0_g1;TRINITY_DN75_c1_g2;TRINITY_DN165_c1_g1;TRINITY_DN178_c1_g1;TRINITY_DN219_c2_g1;TRINITY_DN233_c0_g1;TRINITY_DN306_c1_g1;TRINITY_DN389_c0_g1;TRINITY_DN482_c1_g4;TRINITY_DN518_c0_g1;TRINITY_DN638_c3_g1;TRINITY_DN605_c2_g1;TRINITY_DN703_c1_g1;TRINITY_DN740_c0_g1;TRINITY_DN880_c1_g1;TRINITY_DN890_c0_g1;TRINITY_DN890_c0_g3;TRINITY_DN849_c0_g2;TRINITY_DN849_c0_g3;TR…
endoplasmic reticulum lumen	cellular_component	GO:0005788	264	TRINITY_DN29_c3_g1;TRINITY_DN195_c0_g1;TRINITY_DN172_c1_g2;TRINITY_DN217_c11_g1;TRINITY_DN217_c0_g3;TRINITY_DN332_c2_g1;TRINITY_DN485_c0_g1;TRINITY_DN439_c3_g1;TRINITY_DN400_c0_g2;TRINITY_DN400_c0_g3;TRINITY_DN589_c0_g1;TRINITY_DN530_c1_g2;TRINITY_DN724_c3_g1;TRINITY_DN860_c0_g1;TRINITY_DN815_c0_g1;TRINITY_DN963_c3_g1;TRINITY_DN921_c0_g2;TRINITY_DN1044_c0_g1;TRINITY_DN1062_c0_g1;TRINITY_DN1116_c6…
mRNA binding	molecular_function	GO:0003729	263	TRINITY_DN85_c2_g1;TRINITY_DN125_c0_g1;TRINITY_DN195_c0_g1;TRINITY_DN151_c0_g2;TRINITY_DN151_c0_g1;TRINITY_DN209_c0_g2;TRINITY_DN200_c4_g1;TRINITY_DN396_c2_g2;TRINITY_DN330_c0_g1;TRINITY_DN368_c0_g1;TRINITY_DN392_c0_g1;TRINITY_DN320_c0_g1;TRINITY_DN372_c0_g1;TRINITY_DN426_c0_g1;TRINITY_DN481_c1_g4;TRINITY_DN403_c0_g1;TRINITY_DN453_c0_g2;TRINITY_DN404_c0_g1;TRINITY_DN415_c2_g2;TRINITY_DN411_c0_g1;…
aspartic-type endopeptidase activity	molecular_function	GO:0004190	261	TRINITY_DN150_c0_g1;TRINITY_DN420_c3_g1;TRINITY_DN494_c2_g2;TRINITY_DN479_c4_g1;TRINITY_DN479_c1_g1;TRINITY_DN479_c6_g1;TRINITY_DN889_c1_g2;TRINITY_DN800_c1_g1;TRINITY_DN1130_c6_g1;TRINITY_DN1155_c1_g1;TRINITY_DN1150_c1_g3;TRINITY_DN1150_c35_g1;TRINITY_DN1281_c0_g1;TRINITY_DN1489_c3_g3;TRINITY_DN1489_c3_g4;TRINITY_DN1737_c1_g1;TRINITY_DN1834_c0_g1;TRINITY_DN1924_c0_g1;TRINITY_DN2081_c0_g1;TRINITY…
Notch signaling pathway	biological_process	GO:0007219	260	TRINITY_DN17_c0_g3;TRINITY_DN42_c0_g2;TRINITY_DN33_c3_g2;TRINITY_DN165_c1_g2;TRINITY_DN165_c1_g1;TRINITY_DN165_c1_g4;TRINITY_DN252_c0_g2;TRINITY_DN233_c0_g1;TRINITY_DN329_c0_g1;TRINITY_DN381_c1_g2;TRINITY_DN381_c1_g1;TRINITY_DN389_c0_g1;TRINITY_DN328_c2_g2;TRINITY_DN408_c0_g1;TRINITY_DN426_c0_g2;TRINITY_DN426_c0_g3;TRINITY_DN478_c1_g1;TRINITY_DN494_c2_g2;TRINITY_DN518_c0_g1;TRINITY_DN560_c2_g1;TR…
positive regulation of I-kappaB kinase/NF-kappaB signaling	biological_process	GO:0043123	259	TRINITY_DN15_c0_g1;TRINITY_DN63_c0_g1;TRINITY_DN1_c3_g1;TRINITY_DN1_c3_g2;TRINITY_DN49_c1_g1;TRINITY_DN76_c0_g1;TRINITY_DN23_c2_g1;TRINITY_DN26_c0_g2;TRINITY_DN111_c2_g1;TRINITY_DN108_c1_g1;TRINITY_DN157_c1_g1;TRINITY_DN100_c0_g1;TRINITY_DN139_c0_g1;TRINITY_DN264_c2_g2;TRINITY_DN387_c4_g1;TRINITY_DN414_c0_g1;TRINITY_DN421_c0_g1;TRINITY_DN502_c0_g1;TRINITY_DN566_c0_g1;TRINITY_DN645_c0_g1;TRINITY_D…
receptor activity	molecular_function	GO:0004872	256	TRINITY_DN98_c1_g1;TRINITY_DN62_c0_g1;TRINITY_DN178_c1_g1;TRINITY_DN191_c0_g2;TRINITY_DN219_c2_g1;TRINITY_DN220_c0_g1;TRINITY_DN316_c2_g3;TRINITY_DN353_c0_g2;TRINITY_DN545_c0_g1;TRINITY_DN629_c0_g1;TRINITY_DN634_c2_g1;TRINITY_DN653_c1_g2;TRINITY_DN740_c0_g1;TRINITY_DN1146_c0_g2;TRINITY_DN1235_c0_g1;TRINITY_DN1283_c2_g1;TRINITY_DN1285_c0_g2;TRINITY_DN1205_c2_g1;TRINITY_DN1311_c1_g1;TRINITY_DN1393_…
cilium assembly	biological_process	GO:0042384	256	TRINITY_DN21_c0_g3;TRINITY_DN112_c1_g2;TRINITY_DN112_c1_g1;TRINITY_DN156_c1_g1;TRINITY_DN285_c0_g1;TRINITY_DN231_c1_g1;TRINITY_DN347_c1_g1;TRINITY_DN389_c0_g1;TRINITY_DN305_c1_g1;TRINITY_DN496_c0_g1;TRINITY_DN471_c0_g1;TRINITY_DN577_c0_g1;TRINITY_DN601_c2_g1;TRINITY_DN665_c0_g3;TRINITY_DN649_c6_g1;TRINITY_DN759_c0_g1;TRINITY_DN784_c0_g1;TRINITY_DN742_c2_g1;TRINITY_DN793_c0_g1;TRINITY_DN744_c0_g1;…
flavin adenine dinucleotide binding	molecular_function	GO:0050660	256	TRINITY_DN11_c2_g1;TRINITY_DN87_c0_g1;TRINITY_DN87_c0_g3;TRINITY_DN352_c1_g1;TRINITY_DN360_c0_g1;TRINITY_DN322_c7_g2;TRINITY_DN491_c3_g2;TRINITY_DN607_c0_g1;TRINITY_DN668_c1_g1;TRINITY_DN847_c0_g1;TRINITY_DN847_c0_g2;TRINITY_DN863_c0_g1;TRINITY_DN961_c2_g1;TRINITY_DN925_c0_g1;TRINITY_DN1152_c14_g1;TRINITY_DN1254_c0_g3;TRINITY_DN1390_c1_g1;TRINITY_DN1453_c1_g1;TRINITY_DN1498_c0_g1;TRINITY_DN1539_c…
RNA polymerase II regulatory region sequence-specific DNA binding	molecular_function	GO:0000977	256	TRINITY_DN92_c0_g1;TRINITY_DN44_c0_g1;TRINITY_DN14_c0_g2;TRINITY_DN151_c6_g1;TRINITY_DN165_c1_g3;TRINITY_DN165_c1_g4;TRINITY_DN159_c2_g1;TRINITY_DN110_c4_g1;TRINITY_DN121_c0_g1;TRINITY_DN230_c0_g1;TRINITY_DN265_c0_g1;TRINITY_DN276_c0_g1;TRINITY_DN233_c0_g1;TRINITY_DN312_c2_g1;TRINITY_DN319_c0_g1;TRINITY_DN319_c0_g2;TRINITY_DN332_c4_g2;TRINITY_DN481_c1_g3;TRINITY_DN454_c0_g1;TRINITY_DN428_c7_g1;TR…
metalloendopeptidase activity	molecular_function	GO:0004222	256	TRINITY_DN0_c2_g1;TRINITY_DN491_c2_g6;TRINITY_DN469_c2_g1;TRINITY_DN560_c0_g1;TRINITY_DN533_c1_g1;TRINITY_DN548_c0_g1;TRINITY_DN634_c0_g1;TRINITY_DN694_c0_g1;TRINITY_DN641_c1_g1;TRINITY_DN705_c0_g1;TRINITY_DN784_c1_g1;TRINITY_DN707_c0_g1;TRINITY_DN894_c2_g1;TRINITY_DN885_c0_g2;TRINITY_DN850_c0_g1;TRINITY_DN850_c0_g2;TRINITY_DN850_c1_g2;TRINITY_DN850_c1_g1;TRINITY_DN815_c0_g1;TRINITY_DN935_c5_g1;T…
Z disc	cellular_component	GO:0030018	254	TRINITY_DN72_c2_g2;TRINITY_DN61_c0_g1;TRINITY_DN1_c0_g1;TRINITY_DN76_c0_g1;TRINITY_DN151_c6_g1;TRINITY_DN119_c0_g1;TRINITY_DN136_c5_g1;TRINITY_DN205_c2_g1;TRINITY_DN336_c0_g1;TRINITY_DN376_c0_g1;TRINITY_DN474_c1_g2;TRINITY_DN420_c1_g1;TRINITY_DN560_c2_g1;TRINITY_DN507_c1_g1;TRINITY_DN520_c1_g1;TRINITY_DN572_c4_g1;TRINITY_DN665_c6_g1;TRINITY_DN768_c0_g2;TRINITY_DN712_c9_g1;TRINITY_DN885_c0_g2;TRIN…
blood microparticle	cellular_component	GO:0072562	254	TRINITY_DN30_c0_g1;TRINITY_DN132_c0_g2;TRINITY_DN206_c0_g1;TRINITY_DN235_c1_g1;TRINITY_DN229_c0_g1;TRINITY_DN543_c0_g1;TRINITY_DN986_c0_g1;TRINITY_DN986_c0_g3;TRINITY_DN979_c0_g1;TRINITY_DN1159_c0_g1;TRINITY_DN1299_c2_g1;TRINITY_DN1299_c0_g1;TRINITY_DN1299_c0_g3;TRINITY_DN1391_c1_g1;TRINITY_DN1391_c0_g1;TRINITY_DN1313_c2_g2;TRINITY_DN1313_c1_g1;TRINITY_DN1313_c0_g1;TRINITY_DN1302_c0_g4;TRINITY_DN…
4 iron, 4 sulfur cluster binding	molecular_function	GO:0051539	253	TRINITY_DN143_c0_g1;TRINITY_DN326_c0_g1;TRINITY_DN468_c0_g1;TRINITY_DN847_c2_g1;TRINITY_DN802_c0_g1;TRINITY_DN819_c1_g2;TRINITY_DN819_c1_g1;TRINITY_DN988_c0_g1;TRINITY_DN1059_c1_g1;TRINITY_DN1013_c0_g1;TRINITY_DN1013_c0_g2;TRINITY_DN1042_c0_g1;TRINITY_DN1127_c0_g1;TRINITY_DN1392_c1_g1;TRINITY_DN1910_c0_g2;TRINITY_DN2476_c0_g1;TRINITY_DN2573_c0_g1;TRINITY_DN2701_c2_g1;TRINITY_DN2968_c2_g2;TRINITY_…
actin binding	molecular_function	GO:0003779	249	TRINITY_DN93_c0_g2;TRINITY_DN119_c0_g1;TRINITY_DN121_c1_g2;TRINITY_DN121_c1_g1;TRINITY_DN214_c0_g1;TRINITY_DN200_c0_g1;TRINITY_DN275_c1_g2;TRINITY_DN205_c2_g1;TRINITY_DN337_c0_g1;TRINITY_DN336_c0_g1;TRINITY_DN376_c0_g1;TRINITY_DN451_c2_g3;TRINITY_DN423_c1_g1;TRINITY_DN514_c0_g4;TRINITY_DN545_c0_g1;TRINITY_DN507_c1_g1;TRINITY_DN588_c0_g1;TRINITY_DN695_c0_g2;TRINITY_DN651_c0_g1;TRINITY_DN760_c4_g1;…
vascular endothelial growth factor receptor signaling pathway	biological_process	GO:0048010	248	TRINITY_DN54_c0_g1;TRINITY_DN35_c0_g1;TRINITY_DN86_c2_g1;TRINITY_DN86_c3_g1;TRINITY_DN86_c3_g3;TRINITY_DN86_c3_g2;TRINITY_DN86_c1_g1;TRINITY_DN165_c1_g4;TRINITY_DN203_c0_g2;TRINITY_DN203_c0_g3;TRINITY_DN306_c1_g1;TRINITY_DN351_c1_g1;TRINITY_DN348_c0_g1;TRINITY_DN475_c10_g1;TRINITY_DN521_c0_g1;TRINITY_DN548_c5_g2;TRINITY_DN682_c1_g2;TRINITY_DN619_c0_g1;TRINITY_DN612_c0_g2;TRINITY_DN901_c0_g2;TRINI…
microtubule binding	molecular_function	GO:0008017	248	TRINITY_DN196_c0_g2;TRINITY_DN297_c0_g1;TRINITY_DN236_c0_g1;TRINITY_DN311_c0_g1;TRINITY_DN356_c0_g2;TRINITY_DN356_c0_g3;TRINITY_DN405_c1_g1;TRINITY_DN482_c0_g1;TRINITY_DN428_c1_g1;TRINITY_DN546_c2_g1;TRINITY_DN623_c1_g1;TRINITY_DN620_c1_g1;TRINITY_DN796_c0_g2;TRINITY_DN796_c0_g3;TRINITY_DN711_c0_g2;TRINITY_DN723_c1_g3;TRINITY_DN723_c1_g2;TRINITY_DN854_c0_g2;TRINITY_DN849_c3_g1;TRINITY_DN872_c3_g1…
response to oxidative stress	biological_process	GO:0006979	248	TRINITY_DN93_c4_g1;TRINITY_DN50_c5_g1;TRINITY_DN132_c0_g2;TRINITY_DN111_c12_g1;TRINITY_DN297_c4_g1;TRINITY_DN494_c2_g2;TRINITY_DN402_c1_g1;TRINITY_DN519_c0_g1;TRINITY_DN541_c0_g1;TRINITY_DN730_c0_g1;TRINITY_DN734_c0_g1;TRINITY_DN766_c1_g1;TRINITY_DN944_c0_g1;TRINITY_DN953_c0_g1;TRINITY_DN967_c0_g1;TRINITY_DN1022_c0_g1;TRINITY_DN1059_c1_g1;TRINITY_DN1084_c1_g1;TRINITY_DN1126_c0_g2;TRINITY_DN1216_c…
melanosome	cellular_component	GO:0042470	246	TRINITY_DN78_c12_g1;TRINITY_DN111_c1_g1;TRINITY_DN124_c0_g1;TRINITY_DN200_c1_g1;TRINITY_DN251_c9_g1;TRINITY_DN291_c0_g1;TRINITY_DN231_c1_g1;TRINITY_DN306_c1_g1;TRINITY_DN522_c0_g1;TRINITY_DN545_c0_g1;TRINITY_DN695_c3_g1;TRINITY_DN640_c1_g2;TRINITY_DN640_c1_g1;TRINITY_DN775_c0_g3;TRINITY_DN1086_c0_g1;TRINITY_DN1086_c0_g2;TRINITY_DN1018_c0_g1;TRINITY_DN1080_c2_g1;TRINITY_DN1054_c0_g1;TRINITY_DN1125…
intracellular ribonucleoprotein complex	cellular_component	GO:0030529	246	TRINITY_DN46_c0_g3;TRINITY_DN11_c0_g1;TRINITY_DN11_c3_g1;TRINITY_DN151_c6_g1;TRINITY_DN165_c0_g2;TRINITY_DN179_c0_g1;TRINITY_DN181_c0_g1;TRINITY_DN228_c0_g2;TRINITY_DN220_c0_g1;TRINITY_DN320_c0_g1;TRINITY_DN426_c0_g1;TRINITY_DN426_c0_g2;TRINITY_DN525_c0_g1;TRINITY_DN559_c0_g1;TRINITY_DN511_c6_g1;TRINITY_DN520_c2_g1;TRINITY_DN674_c1_g1;TRINITY_DN617_c0_g1;TRINITY_DN678_c3_g1;TRINITY_DN624_c1_g1;TR…
proteasome-mediated ubiquitin-dependent protein catabolic process	biological_process	GO:0043161	244	TRINITY_DN86_c8_g1;TRINITY_DN40_c0_g1;TRINITY_DN45_c0_g1;TRINITY_DN49_c0_g2;TRINITY_DN192_c0_g4;TRINITY_DN192_c0_g5;TRINITY_DN133_c1_g1;TRINITY_DN111_c2_g1;TRINITY_DN108_c2_g1;TRINITY_DN206_c0_g1;TRINITY_DN264_c2_g2;TRINITY_DN352_c0_g2;TRINITY_DN387_c2_g1;TRINITY_DN304_c0_g1;TRINITY_DN332_c1_g1;TRINITY_DN560_c2_g1;TRINITY_DN548_c5_g2;TRINITY_DN601_c0_g1;TRINITY_DN835_c0_g1;TRINITY_DN827_c0_g1;TRI…
negative regulation of gene expression	biological_process	GO:0010629	243	TRINITY_DN93_c4_g1;TRINITY_DN86_c3_g4;TRINITY_DN1_c3_g1;TRINITY_DN1_c3_g2;TRINITY_DN75_c1_g2;TRINITY_DN125_c3_g1;TRINITY_DN125_c3_g2;TRINITY_DN125_c1_g1;TRINITY_DN164_c1_g1;TRINITY_DN110_c4_g1;TRINITY_DN181_c0_g1;TRINITY_DN263_c2_g1;TRINITY_DN203_c0_g3;TRINITY_DN299_c0_g1;TRINITY_DN277_c0_g2;TRINITY_DN396_c0_g1;TRINITY_DN312_c1_g2;TRINITY_DN312_c1_g1;TRINITY_DN477_c0_g3;TRINITY_DN436_c0_g2;TRINIT…
receptor complex	cellular_component	GO:0043235	242	TRINITY_DN60_c3_g1;TRINITY_DN86_c3_g1;TRINITY_DN86_c3_g3;TRINITY_DN86_c3_g4;TRINITY_DN98_c1_g1;TRINITY_DN94_c0_g1;TRINITY_DN13_c0_g1;TRINITY_DN127_c0_g5;TRINITY_DN164_c0_g1;TRINITY_DN164_c0_g2;TRINITY_DN164_c1_g1;TRINITY_DN130_c1_g1;TRINITY_DN157_c1_g1;TRINITY_DN211_c0_g1;TRINITY_DN252_c0_g1;TRINITY_DN316_c2_g3;TRINITY_DN546_c0_g1;TRINITY_DN545_c0_g1;TRINITY_DN712_c6_g1;TRINITY_DN825_c0_g2;TRINIT…
mitochondrial outer membrane	cellular_component	GO:0005741	240	TRINITY_DN17_c0_g2;TRINITY_DN49_c0_g1;TRINITY_DN123_c0_g1;TRINITY_DN197_c1_g1;TRINITY_DN214_c0_g1;TRINITY_DN214_c0_g2;TRINITY_DN237_c0_g4;TRINITY_DN237_c0_g2;TRINITY_DN317_c0_g1;TRINITY_DN512_c0_g4;TRINITY_DN675_c0_g1;TRINITY_DN619_c0_g1;TRINITY_DN653_c3_g1;TRINITY_DN884_c0_g1;TRINITY_DN809_c0_g1;TRINITY_DN833_c1_g1;TRINITY_DN824_c0_g1;TRINITY_DN866_c0_g1;TRINITY_DN828_c1_g1;TRINITY_DN948_c0_g1;T…
growth cone	cellular_component	GO:0030426	240	TRINITY_DN40_c0_g1;TRINITY_DN28_c0_g3;TRINITY_DN143_c0_g1;TRINITY_DN181_c0_g1;TRINITY_DN219_c0_g1;TRINITY_DN200_c4_g1;TRINITY_DN293_c0_g1;TRINITY_DN220_c16_g1;TRINITY_DN367_c0_g1;TRINITY_DN319_c1_g2;TRINITY_DN332_c1_g1;TRINITY_DN373_c0_g1;TRINITY_DN451_c2_g3;TRINITY_DN404_c2_g1;TRINITY_DN494_c2_g2;TRINITY_DN482_c1_g4;TRINITY_DN447_c0_g2;TRINITY_DN519_c0_g1;TRINITY_DN641_c0_g1;TRINITY_DN653_c1_g2;…
serine-type endopeptidase activity	molecular_function	GO:0004252	239	TRINITY_DN86_c8_g1;TRINITY_DN11_c1_g1;TRINITY_DN143_c1_g2;TRINITY_DN176_c0_g1;TRINITY_DN260_c0_g1;TRINITY_DN306_c0_g2;TRINITY_DN300_c0_g1;TRINITY_DN485_c0_g1;TRINITY_DN543_c0_g1;TRINITY_DN604_c1_g1;TRINITY_DN860_c0_g1;TRINITY_DN989_c1_g1;TRINITY_DN1017_c1_g2;TRINITY_DN1494_c2_g1;TRINITY_DN1457_c1_g1;TRINITY_DN1762_c0_g1;TRINITY_DN1781_c0_g1;TRINITY_DN1720_c0_g1;TRINITY_DN1872_c0_g2;TRINITY_DN1939…
lipid binding	molecular_function	GO:0008289	238	TRINITY_DN17_c0_g1;TRINITY_DN17_c0_g3;TRINITY_DN112_c0_g1;TRINITY_DN125_c1_g1;TRINITY_DN132_c0_g2;TRINITY_DN338_c2_g1;TRINITY_DN408_c0_g1;TRINITY_DN410_c0_g1;TRINITY_DN410_c0_g2;TRINITY_DN475_c0_g1;TRINITY_DN503_c0_g1;TRINITY_DN649_c1_g1;TRINITY_DN746_c2_g1;TRINITY_DN742_c1_g1;TRINITY_DN734_c0_g1;TRINITY_DN736_c0_g1;TRINITY_DN893_c1_g1;TRINITY_DN986_c0_g1;TRINITY_DN986_c0_g3;TRINITY_DN909_c0_g3;T…
protein stabilization	biological_process	GO:0050821	238	TRINITY_DN65_c2_g1;TRINITY_DN180_c0_g1;TRINITY_DN196_c0_g2;TRINITY_DN195_c0_g1;TRINITY_DN165_c1_g2;TRINITY_DN109_c1_g1;TRINITY_DN139_c0_g1;TRINITY_DN236_c0_g1;TRINITY_DN317_c0_g1;TRINITY_DN373_c0_g1;TRINITY_DN460_c0_g1;TRINITY_DN494_c1_g1;TRINITY_DN457_c2_g1;TRINITY_DN485_c1_g1;TRINITY_DN562_c1_g2;TRINITY_DN510_c0_g2;TRINITY_DN543_c1_g1;TRINITY_DN508_c2_g1;TRINITY_DN552_c2_g1;TRINITY_DN572_c6_g1;…
positive regulation of ERK1 and ERK2 cascade	biological_process	GO:0070374	236	TRINITY_DN86_c3_g2;TRINITY_DN86_c1_g1;TRINITY_DN153_c1_g1;TRINITY_DN172_c0_g1;TRINITY_DN203_c0_g3;TRINITY_DN387_c4_g1;TRINITY_DN317_c0_g1;TRINITY_DN372_c1_g1;TRINITY_DN512_c0_g2;TRINITY_DN563_c1_g1;TRINITY_DN645_c0_g1;TRINITY_DN645_c0_g2;TRINITY_DN765_c0_g1;TRINITY_DN756_c0_g2;TRINITY_DN829_c2_g2;TRINITY_DN986_c0_g1;TRINITY_DN986_c0_g3;TRINITY_DN1197_c0_g1;TRINITY_DN1272_c1_g1;TRINITY_DN1272_c1_g…
late endosome	cellular_component	GO:0005770	234	TRINITY_DN89_c2_g1;TRINITY_DN83_c1_g1;TRINITY_DN5_c0_g1;TRINITY_DN94_c0_g1;TRINITY_DN192_c2_g1;TRINITY_DN267_c2_g4;TRINITY_DN360_c0_g1;TRINITY_DN416_c1_g1;TRINITY_DN434_c0_g2;TRINITY_DN462_c5_g1;TRINITY_DN476_c1_g1;TRINITY_DN538_c0_g1;TRINITY_DN582_c0_g2;TRINITY_DN564_c0_g1;TRINITY_DN564_c0_g2;TRINITY_DN572_c0_g1;TRINITY_DN695_c3_g1;TRINITY_DN615_c0_g1;TRINITY_DN708_c0_g1;TRINITY_DN704_c0_g1;TRIN…
Ras protein signal transduction	biological_process	GO:0007265	233	TRINITY_DN54_c0_g1;TRINITY_DN35_c0_g1;TRINITY_DN86_c2_g1;TRINITY_DN86_c3_g1;TRINITY_DN86_c3_g3;TRINITY_DN86_c3_g2;TRINITY_DN86_c1_g1;TRINITY_DN181_c0_g1;TRINITY_DN276_c0_g2;TRINITY_DN270_c0_g1;TRINITY_DN203_c0_g2;TRINITY_DN203_c0_g3;TRINITY_DN220_c4_g1;TRINITY_DN306_c1_g1;TRINITY_DN351_c1_g1;TRINITY_DN348_c0_g1;TRINITY_DN475_c10_g1;TRINITY_DN543_c0_g2;TRINITY_DN521_c0_g1;TRINITY_DN502_c0_g1;TRINI…
cytoskeleton organization	biological_process	GO:0007010	233	TRINITY_DN93_c0_g2;TRINITY_DN72_c2_g2;TRINITY_DN10_c3_g1;TRINITY_DN125_c10_g2;TRINITY_DN196_c0_g2;TRINITY_DN200_c0_g1;TRINITY_DN272_c0_g1;TRINITY_DN312_c0_g1;TRINITY_DN365_c0_g1;TRINITY_DN348_c0_g1;TRINITY_DN440_c1_g1;TRINITY_DN471_c0_g1;TRINITY_DN420_c1_g1;TRINITY_DN588_c0_g1;TRINITY_DN651_c0_g1;TRINITY_DN603_c0_g1;TRINITY_DN785_c1_g3;TRINITY_DN785_c1_g1;TRINITY_DN733_c0_g1;TRINITY_DN878_c0_g1;T…
cytoplasmic vesicle membrane	cellular_component	GO:0030659	232	TRINITY_DN12_c0_g1;TRINITY_DN21_c0_g1;TRINITY_DN5_c0_g1;TRINITY_DN98_c0_g1;TRINITY_DN103_c1_g1;TRINITY_DN111_c1_g1;TRINITY_DN114_c0_g1;TRINITY_DN267_c2_g1;TRINITY_DN270_c0_g1;TRINITY_DN281_c0_g1;TRINITY_DN306_c1_g1;TRINITY_DN491_c2_g4;TRINITY_DN458_c2_g1;TRINITY_DN417_c0_g1;TRINITY_DN505_c0_g1;TRINITY_DN695_c3_g1;TRINITY_DN621_c0_g1;TRINITY_DN796_c0_g2;TRINITY_DN796_c0_g3;TRINITY_DN742_c2_g1;TRIN…
heparin binding	molecular_function	GO:0008201	232	TRINITY_DN86_c3_g1;TRINITY_DN86_c3_g3;TRINITY_DN86_c3_g4;TRINITY_DN86_c1_g1;TRINITY_DN8_c1_g1;TRINITY_DN30_c0_g1;TRINITY_DN13_c0_g2;TRINITY_DN153_c1_g1;TRINITY_DN132_c0_g2;TRINITY_DN205_c0_g1;TRINITY_DN229_c0_g1;TRINITY_DN324_c0_g1;TRINITY_DN491_c2_g6;TRINITY_DN427_c0_g1;TRINITY_DN512_c0_g2;TRINITY_DN705_c2_g1;TRINITY_DN1061_c0_g2;TRINITY_DN1044_c0_g1;TRINITY_DN1031_c0_g1;TRINITY_DN1031_c0_g2;TRI…
histone deacetylase binding	molecular_function	GO:0042826	229	TRINITY_DN21_c1_g1;TRINITY_DN197_c1_g1;TRINITY_DN219_c1_g1;TRINITY_DN265_c0_g1;TRINITY_DN220_c2_g1;TRINITY_DN233_c0_g1;TRINITY_DN329_c0_g1;TRINITY_DN323_c0_g4;TRINITY_DN323_c0_g2;TRINITY_DN323_c2_g1;TRINITY_DN306_c1_g1;TRINITY_DN320_c0_g1;TRINITY_DN551_c3_g1;TRINITY_DN551_c8_g1;TRINITY_DN508_c0_g3;TRINITY_DN515_c0_g1;TRINITY_DN626_c0_g1;TRINITY_DN665_c1_g1;TRINITY_DN738_c0_g1;TRINITY_DN701_c0_g1;…
defense response to virus	biological_process	GO:0051607	228	TRINITY_DN15_c0_g1;TRINITY_DN29_c5_g1;TRINITY_DN11_c1_g1;TRINITY_DN186_c0_g1;TRINITY_DN293_c0_g1;TRINITY_DN307_c1_g1;TRINITY_DN403_c1_g1;TRINITY_DN400_c0_g5;TRINITY_DN400_c0_g1;TRINITY_DN400_c0_g2;TRINITY_DN503_c1_g3;TRINITY_DN503_c1_g1;TRINITY_DN579_c0_g1;TRINITY_DN579_c0_g3;TRINITY_DN667_c0_g1;TRINITY_DN675_c0_g1;TRINITY_DN688_c1_g1;TRINITY_DN622_c6_g1;TRINITY_DN725_c0_g1;TRINITY_DN877_c1_g3;TR…
mitophagy in response to mitochondrial depolarization	biological_process	GO:0098779	228	TRINITY_DN70_c1_g1;TRINITY_DN86_c9_g2;TRINITY_DN176_c4_g1;TRINITY_DN130_c2_g1;TRINITY_DN114_c0_g2;TRINITY_DN297_c3_g1;TRINITY_DN270_c0_g1;TRINITY_DN263_c0_g1;TRINITY_DN289_c0_g1;TRINITY_DN289_c0_g3;TRINITY_DN315_c1_g1;TRINITY_DN350_c0_g1;TRINITY_DN491_c5_g1;TRINITY_DN560_c2_g1;TRINITY_DN546_c2_g1;TRINITY_DN540_c0_g3;TRINITY_DN582_c16_g1;TRINITY_DN591_c1_g2;TRINITY_DN692_c0_g2;TRINITY_DN641_c0_g1;…
activation of MAPKK activity	biological_process	GO:0000186	228	TRINITY_DN54_c0_g1;TRINITY_DN86_c2_g1;TRINITY_DN86_c3_g1;TRINITY_DN86_c3_g3;TRINITY_DN86_c3_g2;TRINITY_DN86_c1_g1;TRINITY_DN22_c0_g3;TRINITY_DN203_c0_g2;TRINITY_DN203_c0_g3;TRINITY_DN306_c1_g1;TRINITY_DN351_c1_g1;TRINITY_DN348_c0_g1;TRINITY_DN371_c0_g1;TRINITY_DN333_c0_g1;TRINITY_DN494_c2_g2;TRINITY_DN475_c10_g1;TRINITY_DN512_c0_g2;TRINITY_DN521_c0_g1;TRINITY_DN548_c5_g2;TRINITY_DN682_c1_g2;TRINI…
spindle	cellular_component	GO:0005819	227	TRINITY_DN3_c0_g1;TRINITY_DN65_c3_g1;TRINITY_DN183_c1_g1;TRINITY_DN170_c0_g1;TRINITY_DN149_c0_g1;TRINITY_DN149_c0_g2;TRINITY_DN100_c1_g1;TRINITY_DN288_c1_g1;TRINITY_DN217_c2_g1;TRINITY_DN281_c1_g1;TRINITY_DN286_c0_g2;TRINITY_DN311_c0_g1;TRINITY_DN356_c0_g3;TRINITY_DN434_c1_g1;TRINITY_DN454_c0_g1;TRINITY_DN601_c2_g1;TRINITY_DN649_c4_g1;TRINITY_DN668_c0_g1;TRINITY_DN720_c1_g1;TRINITY_DN799_c0_g1;TR…
PML body	cellular_component	GO:0016605	226	TRINITY_DN45_c0_g1;TRINITY_DN165_c1_g3;TRINITY_DN238_c1_g1;TRINITY_DN320_c0_g1;TRINITY_DN356_c0_g1;TRINITY_DN345_c0_g1;TRINITY_DN440_c0_g1;TRINITY_DN465_c1_g1;TRINITY_DN494_c0_g2;TRINITY_DN494_c1_g1;TRINITY_DN400_c0_g5;TRINITY_DN400_c0_g1;TRINITY_DN503_c1_g2;TRINITY_DN531_c0_g1;TRINITY_DN534_c1_g1;TRINITY_DN764_c3_g1;TRINITY_DN745_c1_g2;TRINITY_DN745_c1_g1;TRINITY_DN745_c1_g4;TRINITY_DN895_c0_g1;…
nuclear matrix	cellular_component	GO:0016363	225	TRINITY_DN74_c0_g1;TRINITY_DN74_c0_g3;TRINITY_DN3_c0_g1;TRINITY_DN49_c2_g1;TRINITY_DN31_c0_g1;TRINITY_DN103_c1_g1;TRINITY_DN192_c0_g5;TRINITY_DN182_c0_g1;TRINITY_DN279_c1_g1;TRINITY_DN279_c0_g1;TRINITY_DN279_c0_g2;TRINITY_DN265_c0_g1;TRINITY_DN288_c2_g1;TRINITY_DN257_c2_g1;TRINITY_DN317_c0_g1;TRINITY_DN426_c1_g1;TRINITY_DN480_c0_g1;TRINITY_DN458_c2_g1;TRINITY_DN516_c0_g1;TRINITY_DN582_c3_g1;TRINI…
regulation of cell cycle	biological_process	GO:0051726	223	TRINITY_DN11_c0_g1;TRINITY_DN111_c2_g1;TRINITY_DN165_c1_g2;TRINITY_DN178_c1_g1;TRINITY_DN264_c2_g2;TRINITY_DN277_c0_g2;TRINITY_DN283_c0_g1;TRINITY_DN477_c0_g3;TRINITY_DN474_c0_g1;TRINITY_DN525_c0_g1;TRINITY_DN574_c0_g1;TRINITY_DN543_c0_g2;TRINITY_DN575_c0_g1;TRINITY_DN575_c0_g2;TRINITY_DN591_c1_g1;TRINITY_DN545_c0_g1;TRINITY_DN649_c0_g2;TRINITY_DN649_c1_g1;TRINITY_DN671_c0_g1;TRINITY_DN739_c1_g1;…
ruffle	cellular_component	GO:0001726	222	TRINITY_DN72_c2_g2;TRINITY_DN72_c2_g1;TRINITY_DN132_c0_g1;TRINITY_DN108_c2_g1;TRINITY_DN124_c0_g1;TRINITY_DN121_c1_g2;TRINITY_DN121_c1_g1;TRINITY_DN121_c0_g1;TRINITY_DN181_c0_g1;TRINITY_DN258_c3_g1;TRINITY_DN284_c0_g1;TRINITY_DN312_c0_g1;TRINITY_DN337_c0_g1;TRINITY_DN337_c0_g2;TRINITY_DN337_c0_g3;TRINITY_DN315_c0_g2;TRINITY_DN451_c2_g3;TRINITY_DN459_c0_g1;TRINITY_DN519_c0_g1;TRINITY_DN514_c0_g4;T…
sensory perception of sound	biological_process	GO:0007605	221	TRINITY_DN17_c0_g1;TRINITY_DN86_c3_g1;TRINITY_DN86_c3_g3;TRINITY_DN86_c3_g4;TRINITY_DN122_c1_g1;TRINITY_DN259_c0_g6;TRINITY_DN302_c0_g1;TRINITY_DN315_c0_g2;TRINITY_DN356_c0_g3;TRINITY_DN478_c1_g1;TRINITY_DN447_c0_g1;TRINITY_DN514_c0_g4;TRINITY_DN546_c2_g1;TRINITY_DN581_c0_g1;TRINITY_DN661_c1_g1;TRINITY_DN697_c0_g1;TRINITY_DN648_c3_g1;TRINITY_DN648_c3_g2;TRINITY_DN739_c0_g1;TRINITY_DN725_c1_g1;TRI…
basement membrane	cellular_component	GO:0005604	220	TRINITY_DN78_c12_g1;TRINITY_DN38_c0_g2;TRINITY_DN13_c0_g2;TRINITY_DN31_c0_g1;TRINITY_DN28_c0_g3;TRINITY_DN184_c1_g1;TRINITY_DN148_c0_g1;TRINITY_DN276_c0_g2;TRINITY_DN221_c0_g1;TRINITY_DN264_c1_g1;TRINITY_DN321_c0_g1;TRINITY_DN471_c0_g1;TRINITY_DN545_c0_g1;TRINITY_DN638_c2_g1;TRINITY_DN751_c1_g2;TRINITY_DN726_c1_g1;TRINITY_DN726_c0_g1;TRINITY_DN772_c6_g1;TRINITY_DN865_c0_g2;TRINITY_DN957_c0_g1;TRI…
visual perception	biological_process	GO:0007601	220	TRINITY_DN21_c0_g2;TRINITY_DN169_c1_g1;TRINITY_DN253_c0_g1;TRINITY_DN232_c0_g1;TRINITY_DN335_c0_g1;TRINITY_DN321_c0_g1;TRINITY_DN392_c1_g1;TRINITY_DN356_c0_g3;TRINITY_DN412_c0_g1;TRINITY_DN568_c0_g1;TRINITY_DN642_c0_g1;TRINITY_DN742_c2_g1;TRINITY_DN872_c0_g1;TRINITY_DN1357_c0_g1;TRINITY_DN1447_c5_g1;TRINITY_DN1420_c0_g2;TRINITY_DN1614_c0_g1;TRINITY_DN1740_c0_g1;TRINITY_DN1780_c2_g1;TRINITY_DN1752…
extracellular matrix	cellular_component	GO:0031012	219	TRINITY_DN41_c0_g2;TRINITY_DN66_c0_g1;TRINITY_DN76_c0_g1;TRINITY_DN153_c1_g1;TRINITY_DN132_c0_g2;TRINITY_DN184_c1_g1;TRINITY_DN195_c0_g1;TRINITY_DN148_c0_g1;TRINITY_DN172_c1_g2;TRINITY_DN156_c1_g2;TRINITY_DN226_c0_g1;TRINITY_DN221_c0_g1;TRINITY_DN480_c0_g1;TRINITY_DN471_c0_g1;TRINITY_DN469_c2_g1;TRINITY_DN421_c0_g1;TRINITY_DN427_c0_g1;TRINITY_DN428_c4_g5;TRINITY_DN578_c0_g1;TRINITY_DN516_c0_g1;TR…
bicellular tight junction	cellular_component	GO:0005923	218	TRINITY_DN65_c1_g1;TRINITY_DN45_c0_g1;TRINITY_DN110_c0_g1;TRINITY_DN293_c0_g1;TRINITY_DN307_c0_g1;TRINITY_DN370_c1_g1;TRINITY_DN372_c13_g1;TRINITY_DN441_c2_g2;TRINITY_DN441_c2_g1;TRINITY_DN546_c7_g1;TRINITY_DN546_c1_g2;TRINITY_DN676_c0_g1;TRINITY_DN741_c0_g1;TRINITY_DN901_c8_g1;TRINITY_DN978_c0_g1;TRINITY_DN978_c0_g2;TRINITY_DN1083_c2_g1;TRINITY_DN1178_c1_g2;TRINITY_DN1178_c1_g1;TRINITY_DN1268_c0…
peroxisome	cellular_component	GO:0005777	216	TRINITY_DN49_c2_g1;TRINITY_DN161_c0_g1;TRINITY_DN110_c0_g1;TRINITY_DN322_c7_g2;TRINITY_DN604_c1_g1;TRINITY_DN643_c1_g1;TRINITY_DN675_c0_g1;TRINITY_DN761_c0_g1;TRINITY_DN736_c0_g1;TRINITY_DN847_c0_g1;TRINITY_DN847_c0_g2;TRINITY_DN839_c0_g1;TRINITY_DN943_c0_g1;TRINITY_DN961_c2_g1;TRINITY_DN1004_c0_g1;TRINITY_DN1046_c0_g1;TRINITY_DN1017_c1_g2;TRINITY_DN1282_c0_g1;TRINITY_DN1282_c0_g2;TRINITY_DN1240_…
spindle pole	cellular_component	GO:0000922	215	TRINITY_DN3_c0_g1;TRINITY_DN56_c0_g1;TRINITY_DN45_c0_g1;TRINITY_DN31_c0_g1;TRINITY_DN125_c0_g1;TRINITY_DN129_c0_g1;TRINITY_DN121_c1_g1;TRINITY_DN218_c0_g1;TRINITY_DN387_c2_g1;TRINITY_DN311_c0_g1;TRINITY_DN304_c0_g1;TRINITY_DN305_c1_g1;TRINITY_DN620_c0_g1;TRINITY_DN668_c0_g1;TRINITY_DN753_c0_g4;TRINITY_DN843_c0_g1;TRINITY_DN878_c0_g1;TRINITY_DN966_c0_g2;TRINITY_DN965_c0_g1;TRINITY_DN967_c0_g1;TRIN…
response to organic cyclic compound	biological_process	GO:0014070	214	TRINITY_DN153_c1_g1;TRINITY_DN123_c0_g1;TRINITY_DN157_c0_g1;TRINITY_DN271_c0_g2;TRINITY_DN291_c0_g1;TRINITY_DN314_c1_g1;TRINITY_DN362_c0_g1;TRINITY_DN358_c0_g1;TRINITY_DN455_c2_g1;TRINITY_DN402_c0_g1;TRINITY_DN572_c1_g1;TRINITY_DN645_c0_g1;TRINITY_DN645_c0_g2;TRINITY_DN663_c12_g1;TRINITY_DN783_c2_g1;TRINITY_DN884_c0_g1;TRINITY_DN863_c0_g1;TRINITY_DN813_c0_g1;TRINITY_DN908_c0_g1;TRINITY_DN1017_c1_…
complement activation, classical pathway	biological_process	GO:0006958	213	TRINITY_DN986_c0_g1;TRINITY_DN986_c0_g3;TRINITY_DN979_c0_g1;TRINITY_DN1299_c0_g4;TRINITY_DN1299_c2_g1;TRINITY_DN1299_c0_g1;TRINITY_DN1299_c0_g3;TRINITY_DN1391_c1_g1;TRINITY_DN1391_c0_g1;TRINITY_DN1313_c2_g2;TRINITY_DN1313_c1_g1;TRINITY_DN1313_c0_g1;TRINITY_DN1488_c2_g1;TRINITY_DN1720_c0_g1;TRINITY_DN1926_c0_g1;TRINITY_DN1926_c0_g2;TRINITY_DN2225_c0_g2;TRINITY_DN2365_c2_g1;TRINITY_DN2365_c0_g1;TRI…
protein dephosphorylation	biological_process	GO:0006470	213	TRINITY_DN39_c1_g1;TRINITY_DN10_c0_g1;TRINITY_DN10_c1_g1;TRINITY_DN1_c0_g1;TRINITY_DN120_c2_g1;TRINITY_DN191_c2_g1;TRINITY_DN242_c2_g1;TRINITY_DN202_c1_g1;TRINITY_DN203_c0_g2;TRINITY_DN387_c2_g1;TRINITY_DN346_c1_g1;TRINITY_DN383_c1_g1;TRINITY_DN351_c1_g1;TRINITY_DN332_c1_g1;TRINITY_DN489_c0_g1;TRINITY_DN475_c10_g1;TRINITY_DN623_c2_g1;TRINITY_DN734_c1_g1;TRINITY_DN843_c3_g2;TRINITY_DN849_c3_g1;TRI…
negative regulation of neuron apoptotic process	biological_process	GO:0043524	212	TRINITY_DN98_c1_g1;TRINITY_DN132_c0_g2;TRINITY_DN156_c1_g2;TRINITY_DN265_c0_g1;TRINITY_DN203_c0_g3;TRINITY_DN481_c1_g4;TRINITY_DN483_c0_g1;TRINITY_DN491_c2_g1;TRINITY_DN494_c2_g2;TRINITY_DN521_c0_g1;TRINITY_DN586_c1_g1;TRINITY_DN592_c0_g1;TRINITY_DN658_c0_g1;TRINITY_DN694_c0_g1;TRINITY_DN654_c0_g1;TRINITY_DN708_c0_g1;TRINITY_DN703_c1_g1;TRINITY_DN854_c1_g1;TRINITY_DN901_c0_g2;TRINITY_DN906_c2_g1;…
recycling endosome	cellular_component	GO:0055037	211	TRINITY_DN89_c2_g1;TRINITY_DN0_c5_g1;TRINITY_DN154_c1_g1;TRINITY_DN124_c0_g1;TRINITY_DN187_c0_g1;TRINITY_DN211_c0_g1;TRINITY_DN231_c1_g1;TRINITY_DN469_c1_g1;TRINITY_DN544_c2_g1;TRINITY_DN504_c1_g3;TRINITY_DN504_c1_g1;TRINITY_DN546_c3_g1;TRINITY_DN545_c0_g1;TRINITY_DN631_c0_g1;TRINITY_DN615_c0_g1;TRINITY_DN809_c0_g1;TRINITY_DN895_c2_g1;TRINITY_DN901_c1_g1;TRINITY_DN923_c2_g1;TRINITY_DN1040_c0_g3;T…
defense response to bacterium	biological_process	GO:0042742	211	TRINITY_DN83_c1_g1;TRINITY_DN118_c1_g1;TRINITY_DN173_c0_g1;TRINITY_DN200_c1_g1;TRINITY_DN265_c0_g1;TRINITY_DN261_c1_g1;TRINITY_DN393_c0_g1;TRINITY_DN477_c1_g2;TRINITY_DN415_c4_g1;TRINITY_DN538_c1_g2;TRINITY_DN613_c0_g1;TRINITY_DN675_c0_g1;TRINITY_DN1061_c0_g2;TRINITY_DN1167_c0_g1;TRINITY_DN1205_c0_g1;TRINITY_DN1341_c0_g1;TRINITY_DN1391_c1_g1;TRINITY_DN1391_c0_g1;TRINITY_DN1313_c1_g1;TRINITY_DN137…
glucose homeostasis	biological_process	GO:0042593	211	TRINITY_DN12_c0_g1;TRINITY_DN21_c1_g1;TRINITY_DN20_c0_g2;TRINITY_DN86_c2_g1;TRINITY_DN86_c1_g1;TRINITY_DN8_c1_g1;TRINITY_DN69_c2_g2;TRINITY_DN13_c0_g1;TRINITY_DN11_c2_g1;TRINITY_DN164_c1_g1;TRINITY_DN159_c1_g1;TRINITY_DN223_c0_g1;TRINITY_DN223_c0_g2;TRINITY_DN234_c1_g1;TRINITY_DN359_c0_g1;TRINITY_DN452_c0_g1;TRINITY_DN510_c0_g2;TRINITY_DN601_c4_g1;TRINITY_DN665_c1_g1;TRINITY_DN679_c1_g1;TRINITY_D…
response to estradiol	biological_process	GO:0032355	211	TRINITY_DN47_c0_g1;TRINITY_DN8_c1_g1;TRINITY_DN49_c2_g1;TRINITY_DN153_c1_g1;TRINITY_DN164_c1_g1;TRINITY_DN195_c0_g1;TRINITY_DN265_c1_g1;TRINITY_DN205_c0_g1;TRINITY_DN217_c0_g3;TRINITY_DN314_c1_g1;TRINITY_DN481_c1_g4;TRINITY_DN402_c0_g1;TRINITY_DN583_c0_g1;TRINITY_DN582_c1_g1;TRINITY_DN561_c0_g1;TRINITY_DN561_c0_g2;TRINITY_DN783_c2_g1;TRINITY_DN986_c0_g1;TRINITY_DN986_c0_g3;TRINITY_DN908_c0_g1;TRI…
dendritic spine	cellular_component	GO:0043197	210	TRINITY_DN48_c1_g1;TRINITY_DN200_c0_g1;TRINITY_DN271_c0_g1;TRINITY_DN231_c0_g1;TRINITY_DN387_c4_g1;TRINITY_DN519_c0_g1;TRINITY_DN512_c0_g4;TRINITY_DN501_c3_g1;TRINITY_DN566_c0_g1;TRINITY_DN558_c5_g1;TRINITY_DN545_c0_g1;TRINITY_DN576_c0_g2;TRINITY_DN665_c6_g1;TRINITY_DN760_c4_g1;TRINITY_DN783_c2_g1;TRINITY_DN716_c0_g1;TRINITY_DN863_c0_g1;TRINITY_DN849_c3_g1;TRINITY_DN958_c0_g2;TRINITY_DN967_c0_g1;…
electron carrier activity	molecular_function	GO:0009055	209	TRINITY_DN189_c1_g1;TRINITY_DN360_c0_g1;TRINITY_DN322_c7_g2;TRINITY_DN668_c1_g1;TRINITY_DN847_c0_g1;TRINITY_DN847_c0_g2;TRINITY_DN840_c0_g1;TRINITY_DN819_c1_g2;TRINITY_DN819_c1_g1;TRINITY_DN988_c0_g1;TRINITY_DN961_c2_g1;TRINITY_DN1020_c0_g1;TRINITY_DN1020_c0_g2;TRINITY_DN1254_c0_g3;TRINITY_DN1390_c1_g1;TRINITY_DN1453_c1_g1;TRINITY_DN1589_c1_g1;TRINITY_DN1672_c0_g1;TRINITY_DN1613_c0_g1;TRINITY_DN1…
apical part of cell	cellular_component	GO:0045177	208	TRINITY_DN3_c0_g1;TRINITY_DN103_c1_g1;TRINITY_DN218_c0_g1;TRINITY_DN315_c0_g2;TRINITY_DN458_c2_g1;TRINITY_DN482_c1_g4;TRINITY_DN514_c0_g4;TRINITY_DN546_c1_g2;TRINITY_DN663_c12_g1;TRINITY_DN775_c0_g1;TRINITY_DN847_c3_g1;TRINITY_DN809_c0_g1;TRINITY_DN978_c0_g1;TRINITY_DN978_c0_g2;TRINITY_DN1053_c0_g1;TRINITY_DN1083_c2_g1;TRINITY_DN1068_c1_g2;TRINITY_DN1489_c3_g1;TRINITY_DN1642_c1_g1;TRINITY_DN1604_…
negative regulation of sequence-specific DNA binding transcription factor activity	biological_process	GO:0043433	208	TRINITY_DN8_c1_g1;TRINITY_DN22_c1_g2;TRINITY_DN109_c1_g1;TRINITY_DN352_c0_g2;TRINITY_DN329_c0_g1;TRINITY_DN307_c2_g1;TRINITY_DN317_c0_g1;TRINITY_DN323_c0_g4;TRINITY_DN323_c0_g2;TRINITY_DN323_c2_g1;TRINITY_DN332_c4_g2;TRINITY_DN491_c3_g2;TRINITY_DN494_c0_g2;TRINITY_DN551_c3_g1;TRINITY_DN551_c8_g1;TRINITY_DN546_c0_g1;TRINITY_DN558_c0_g1;TRINITY_DN520_c3_g1;TRINITY_DN895_c0_g1;TRINITY_DN1199_c0_g1;T…
hydrolase activity	molecular_function	GO:0016787	208	TRINITY_DN32_c0_g1;TRINITY_DN104_c1_g1;TRINITY_DN161_c0_g1;TRINITY_DN107_c0_g1;TRINITY_DN383_c0_g1;TRINITY_DN468_c0_g3;TRINITY_DN581_c0_g2;TRINITY_DN787_c0_g2;TRINITY_DN787_c0_g3;TRINITY_DN832_c0_g1;TRINITY_DN931_c1_g1;TRINITY_DN1159_c0_g1;TRINITY_DN1293_c0_g1;TRINITY_DN1237_c0_g1;TRINITY_DN1379_c0_g1;TRINITY_DN1390_c2_g4;TRINITY_DN1339_c1_g1;TRINITY_DN1401_c0_g1;TRINITY_DN1561_c0_g1;TRINITY_DN16…
negative regulation of canonical Wnt signaling pathway	biological_process	GO:0090090	208	TRINITY_DN240_c0_g1;TRINITY_DN217_c11_g1;TRINITY_DN217_c0_g3;TRINITY_DN307_c2_g1;TRINITY_DN373_c0_g1;TRINITY_DN371_c0_g1;TRINITY_DN478_c1_g1;TRINITY_DN488_c0_g1;TRINITY_DN485_c0_g1;TRINITY_DN562_c1_g2;TRINITY_DN546_c0_g1;TRINITY_DN548_c5_g2;TRINITY_DN682_c1_g2;TRINITY_DN634_c1_g1;TRINITY_DN634_c2_g1;TRINITY_DN612_c0_g1;TRINITY_DN620_c0_g1;TRINITY_DN827_c0_g1;TRINITY_DN895_c0_g1;TRINITY_DN941_c0_g…
chromosome	cellular_component	GO:0005694	207	TRINITY_DN52_c0_g2;TRINITY_DN74_c2_g1;TRINITY_DN81_c0_g1;TRINITY_DN81_c0_g2;TRINITY_DN3_c0_g1;TRINITY_DN31_c0_g1;TRINITY_DN296_c0_g1;TRINITY_DN352_c3_g1;TRINITY_DN341_c0_g1;TRINITY_DN378_c1_g1;TRINITY_DN372_c0_g2;TRINITY_DN493_c2_g1;TRINITY_DN436_c0_g1;TRINITY_DN414_c0_g1;TRINITY_DN508_c1_g2;TRINITY_DN508_c1_g1;TRINITY_DN661_c1_g1;TRINITY_DN864_c2_g1;TRINITY_DN859_c0_g2;TRINITY_DN899_c2_g1;TRINIT…
rRNA processing	biological_process	GO:0006364	207	TRINITY_DN11_c0_g1;TRINITY_DN161_c0_g1;TRINITY_DN169_c1_g1;TRINITY_DN113_c0_g1;TRINITY_DN267_c1_g1;TRINITY_DN259_c0_g6;TRINITY_DN254_c1_g1;TRINITY_DN441_c0_g1;TRINITY_DN400_c0_g5;TRINITY_DN400_c0_g1;TRINITY_DN703_c1_g1;TRINITY_DN752_c0_g1;TRINITY_DN889_c0_g1;TRINITY_DN852_c0_g1;TRINITY_DN866_c5_g1;TRINITY_DN942_c4_g1;TRINITY_DN942_c2_g1;TRINITY_DN1133_c0_g1;TRINITY_DN1260_c1_g2;TRINITY_DN1448_c1_…
transforming growth factor beta receptor signaling pathway	biological_process	GO:0007179	205	TRINITY_DN76_c0_g1;TRINITY_DN109_c1_g1;TRINITY_DN156_c1_g2;TRINITY_DN244_c0_g1;TRINITY_DN226_c0_g1;TRINITY_DN316_c2_g3;TRINITY_DN333_c0_g1;TRINITY_DN482_c1_g4;TRINITY_DN422_c0_g1;TRINITY_DN422_c0_g2;TRINITY_DN422_c0_g3;TRINITY_DN578_c0_g1;TRINITY_DN518_c0_g1;TRINITY_DN762_c0_g1;TRINITY_DN798_c5_g1;TRINITY_DN880_c1_g1;TRINITY_DN901_c3_g1;TRINITY_DN1028_c0_g1;TRINITY_DN1077_c0_g1;TRINITY_DN1068_c1_…
regulation of Rho protein signal transduction	biological_process	GO:0035023	205	TRINITY_DN65_c0_g1;TRINITY_DN65_c0_g2;TRINITY_DN65_c0_g3;TRINITY_DN103_c0_g1;TRINITY_DN263_c2_g1;TRINITY_DN220_c16_g1;TRINITY_DN312_c0_g1;TRINITY_DN416_c0_g1;TRINITY_DN519_c0_g1;TRINITY_DN619_c0_g1;TRINITY_DN632_c0_g1;TRINITY_DN600_c0_g1;TRINITY_DN609_c0_g1;TRINITY_DN754_c0_g1;TRINITY_DN739_c1_g1;TRINITY_DN791_c0_g1;TRINITY_DN970_c0_g1;TRINITY_DN901_c5_g1;TRINITY_DN909_c0_g3;TRINITY_DN1094_c0_g1;…
actin filament binding	molecular_function	GO:0051015	204	TRINITY_DN132_c0_g1;TRINITY_DN121_c1_g2;TRINITY_DN121_c1_g1;TRINITY_DN200_c0_g1;TRINITY_DN275_c1_g2;TRINITY_DN299_c0_g1;TRINITY_DN337_c0_g1;TRINITY_DN316_c0_g1;TRINITY_DN451_c2_g3;TRINITY_DN423_c1_g1;TRINITY_DN514_c0_g4;TRINITY_DN760_c4_g1;TRINITY_DN785_c1_g3;TRINITY_DN785_c1_g1;TRINITY_DN901_c8_g1;TRINITY_DN961_c1_g1;TRINITY_DN1050_c2_g1;TRINITY_DN1259_c0_g1;TRINITY_DN1402_c0_g1;TRINITY_DN1469_c…
thiol-dependent ubiquitin-specific protease activity	molecular_function	GO:0004843	204	TRINITY_DN76_c0_g2;TRINITY_DN28_c0_g2;TRINITY_DN192_c0_g4;TRINITY_DN192_c0_g5;TRINITY_DN162_c0_g1;TRINITY_DN139_c0_g1;TRINITY_DN227_c0_g1;TRINITY_DN245_c3_g1;TRINITY_DN482_c1_g4;TRINITY_DN422_c0_g1;TRINITY_DN422_c0_g2;TRINITY_DN422_c0_g3;TRINITY_DN596_c3_g1;TRINITY_DN576_c4_g1;TRINITY_DN635_c0_g1;TRINITY_DN764_c3_g1;TRINITY_DN801_c0_g1;TRINITY_DN1068_c1_g2;TRINITY_DN1081_c0_g1;TRINITY_DN1160_c0_g…
protein processing	biological_process	GO:0016485	203	TRINITY_DN8_c1_g1;TRINITY_DN252_c0_g2;TRINITY_DN306_c0_g2;TRINITY_DN389_c0_g1;TRINITY_DN494_c2_g2;TRINITY_DN485_c0_g1;TRINITY_DN560_c0_g1;TRINITY_DN522_c0_g1;TRINITY_DN604_c1_g1;TRINITY_DN708_c0_g1;TRINITY_DN790_c0_g1;TRINITY_DN860_c0_g1;TRINITY_DN894_c2_g1;TRINITY_DN850_c0_g1;TRINITY_DN850_c0_g2;TRINITY_DN1017_c1_g2;TRINITY_DN1140_c5_g1;TRINITY_DN1155_c1_g1;TRINITY_DN1306_c1_g1;TRINITY_DN1429_c0…
response to toxic substance	biological_process	GO:0009636	203	TRINITY_DN25_c0_g1;TRINITY_DN258_c0_g1;TRINITY_DN327_c0_g1;TRINITY_DN438_c3_g1;TRINITY_DN402_c1_g1;TRINITY_DN543_c0_g2;TRINITY_DN572_c1_g1;TRINITY_DN693_c0_g1;TRINITY_DN898_c0_g1;TRINITY_DN872_c3_g1;TRINITY_DN842_c0_g1;TRINITY_DN878_c0_g1;TRINITY_DN904_c1_g1;TRINITY_DN918_c0_g1;TRINITY_DN1022_c0_g1;TRINITY_DN1268_c0_g1;TRINITY_DN1382_c1_g1;TRINITY_DN1459_c1_g1;TRINITY_DN1459_c0_g2;TRINITY_DN1590_…
helicase activity	molecular_function	GO:0004386	203	TRINITY_DN45_c0_g1;TRINITY_DN14_c0_g1;TRINITY_DN23_c2_g1;TRINITY_DN110_c1_g3;TRINITY_DN110_c1_g2;TRINITY_DN110_c1_g1;TRINITY_DN259_c0_g6;TRINITY_DN259_c0_g1;TRINITY_DN338_c1_g1;TRINITY_DN394_c3_g1;TRINITY_DN426_c1_g1;TRINITY_DN420_c0_g1;TRINITY_DN420_c0_g2;TRINITY_DN402_c1_g1;TRINITY_DN546_c0_g1;TRINITY_DN554_c0_g1;TRINITY_DN605_c2_g1;TRINITY_DN796_c1_g1;TRINITY_DN720_c0_g1;TRINITY_DN908_c0_g1;TR…
sarcolemma	cellular_component	GO:0042383	203	TRINITY_DN5_c0_g1;TRINITY_DN78_c12_g1;TRINITY_DN61_c0_g1;TRINITY_DN67_c0_g1;TRINITY_DN157_c0_g1;TRINITY_DN271_c0_g1;TRINITY_DN271_c0_g3;TRINITY_DN291_c0_g1;TRINITY_DN205_c2_g1;TRINITY_DN234_c1_g1;TRINITY_DN336_c0_g1;TRINITY_DN455_c0_g1;TRINITY_DN560_c2_g1;TRINITY_DN545_c0_g1;TRINITY_DN665_c6_g1;TRINITY_DN638_c0_g1;TRINITY_DN768_c0_g2;TRINITY_DN712_c9_g1;TRINITY_DN821_c0_g1;TRINITY_DN837_c3_g2;TRI…
pyridoxal phosphate binding	molecular_function	GO:0030170	201	TRINITY_DN69_c2_g2;TRINITY_DN69_c2_g1;TRINITY_DN105_c0_g1;TRINITY_DN110_c3_g1;TRINITY_DN261_c1_g1;TRINITY_DN601_c4_g1;TRINITY_DN624_c1_g1;TRINITY_DN663_c12_g1;TRINITY_DN641_c3_g1;TRINITY_DN723_c0_g1;TRINITY_DN723_c0_g3;TRINITY_DN709_c0_g1;TRINITY_DN931_c3_g1;TRINITY_DN1341_c2_g1;TRINITY_DN1417_c0_g4;TRINITY_DN1417_c0_g1;TRINITY_DN1597_c3_g1;TRINITY_DN1758_c0_g1;TRINITY_DN2075_c7_g1;TRINITY_DN2032…
cytosolic large ribosomal subunit	cellular_component	GO:0022625	200	TRINITY_DN228_c0_g2;TRINITY_DN228_c0_g3;TRINITY_DN352_c0_g1;TRINITY_DN392_c1_g2;TRINITY_DN432_c0_g1;TRINITY_DN432_c0_g3;TRINITY_DN572_c2_g2;TRINITY_DN572_c2_g1;TRINITY_DN686_c0_g1;TRINITY_DN663_c0_g3;TRINITY_DN883_c0_g1;TRINITY_DN931_c0_g1;TRINITY_DN989_c3_g1;TRINITY_DN1047_c0_g1;TRINITY_DN1210_c3_g1;TRINITY_DN1260_c1_g2;TRINITY_DN1559_c3_g1;TRINITY_DN1521_c1_g1;TRINITY_DN1571_c0_g1;TRINITY_DN157…
response to ethanol	biological_process	GO:0045471	200	TRINITY_DN29_c3_g1;TRINITY_DN48_c1_g1;TRINITY_DN164_c1_g1;TRINITY_DN111_c2_g1;TRINITY_DN110_c4_g1;TRINITY_DN265_c1_g1;TRINITY_DN291_c0_g1;TRINITY_DN264_c2_g2;TRINITY_DN312_c2_g1;TRINITY_DN314_c1_g1;TRINITY_DN583_c0_g1;TRINITY_DN709_c0_g1;TRINITY_DN871_c1_g1;TRINITY_DN837_c3_g2;TRINITY_DN887_c0_g1;TRINITY_DN1070_c2_g3;TRINITY_DN1050_c0_g2;TRINITY_DN1206_c0_g1;TRINITY_DN1222_c0_g1;TRINITY_DN1203_c0…
double-strand break repair	biological_process	GO:0006302	200	TRINITY_DN187_c0_g1;TRINITY_DN352_c3_g1;TRINITY_DN338_c1_g1;TRINITY_DN491_c2_g1;TRINITY_DN503_c1_g2;TRINITY_DN695_c0_g1;TRINITY_DN730_c0_g1;TRINITY_DN782_c0_g1;TRINITY_DN709_c1_g1;TRINITY_DN824_c11_g1;TRINITY_DN930_c0_g1;TRINITY_DN1041_c1_g1;TRINITY_DN1042_c0_g1;TRINITY_DN1015_c0_g1;TRINITY_DN1136_c0_g2;TRINITY_DN1195_c0_g1;TRINITY_DN1246_c0_g1;TRINITY_DN1315_c1_g1;TRINITY_DN1492_c1_g1;TRINITY_DN…
peptidyl-tyrosine phosphorylation	biological_process	GO:0018108	200	TRINITY_DN86_c3_g1;TRINITY_DN86_c3_g3;TRINITY_DN86_c3_g2;TRINITY_DN86_c3_g4;TRINITY_DN86_c1_g1;TRINITY_DN99_c0_g1;TRINITY_DN164_c0_g1;TRINITY_DN164_c0_g2;TRINITY_DN164_c1_g1;TRINITY_DN259_c1_g1;TRINITY_DN252_c0_g1;TRINITY_DN387_c4_g1;TRINITY_DN398_c0_g1;TRINITY_DN398_c0_g2;TRINITY_DN499_c0_g1;TRINITY_DN483_c0_g1;TRINITY_DN458_c0_g1;TRINITY_DN583_c0_g1;TRINITY_DN512_c0_g4;TRINITY_DN512_c0_g1;TRINI…
cellular response to hypoxia	biological_process	GO:0071456	199	TRINITY_DN93_c4_g1;TRINITY_DN74_c0_g1;TRINITY_DN165_c1_g2;TRINITY_DN157_c0_g1;TRINITY_DN205_c1_g1;TRINITY_DN264_c0_g1;TRINITY_DN412_c0_g1;TRINITY_DN444_c1_g1;TRINITY_DN428_c1_g1;TRINITY_DN596_c16_g1;TRINITY_DN665_c6_g1;TRINITY_DN694_c0_g1;TRINITY_DN653_c3_g1;TRINITY_DN739_c0_g5;TRINITY_DN809_c0_g1;TRINITY_DN871_c1_g2;TRINITY_DN901_c3_g1;TRINITY_DN944_c0_g1;TRINITY_DN918_c0_g1;TRINITY_DN1182_c0_g1…
neural tube closure	biological_process	GO:0001843	197	TRINITY_DN9_c0_g1;TRINITY_DN8_c1_g1;TRINITY_DN62_c0_g1;TRINITY_DN125_c3_g1;TRINITY_DN125_c3_g2;TRINITY_DN191_c0_g1;TRINITY_DN257_c1_g1;TRINITY_DN217_c0_g3;TRINITY_DN301_c0_g1;TRINITY_DN389_c0_g1;TRINITY_DN551_c1_g1;TRINITY_DN512_c0_g2;TRINITY_DN760_c0_g1;TRINITY_DN844_c0_g1;TRINITY_DN802_c0_g1;TRINITY_DN969_c0_g1;TRINITY_DN969_c0_g3;TRINITY_DN926_c0_g1;TRINITY_DN919_c1_g1;TRINITY_DN1059_c1_g1;TRI…
cellular response to insulin stimulus	biological_process	GO:0032869	196	TRINITY_DN70_c0_g2;TRINITY_DN21_c1_g1;TRINITY_DN75_c0_g1;TRINITY_DN196_c0_g2;TRINITY_DN164_c1_g1;TRINITY_DN157_c0_g1;TRINITY_DN197_c1_g1;TRINITY_DN281_c0_g1;TRINITY_DN233_c0_g1;TRINITY_DN277_c0_g1;TRINITY_DN283_c0_g1;TRINITY_DN302_c0_g1;TRINITY_DN467_c7_g1;TRINITY_DN546_c0_g1;TRINITY_DN596_c16_g1;TRINITY_DN779_c2_g1;TRINITY_DN742_c1_g1;TRINITY_DN742_c2_g1;TRINITY_DN827_c0_g1;TRINITY_DN831_c0_g1;T…
centriole	cellular_component	GO:0005814	196	TRINITY_DN21_c0_g3;TRINITY_DN3_c0_g2;TRINITY_DN86_c5_g2;TRINITY_DN45_c0_g1;TRINITY_DN112_c1_g2;TRINITY_DN112_c1_g1;TRINITY_DN143_c0_g1;TRINITY_DN188_c0_g2;TRINITY_DN218_c0_g1;TRINITY_DN387_c2_g1;TRINITY_DN367_c1_g1;TRINITY_DN305_c1_g1;TRINITY_DN440_c1_g1;TRINITY_DN502_c0_g1;TRINITY_DN910_c0_g1;TRINITY_DN932_c1_g1;TRINITY_DN993_c1_g1;TRINITY_DN959_c1_g1;TRINITY_DN992_c0_g1;TRINITY_DN982_c0_g1;TRIN…
catalytic step 2 spliceosome	cellular_component	GO:0071013	196	TRINITY_DN74_c1_g1;TRINITY_DN81_c0_g1;TRINITY_DN81_c0_g2;TRINITY_DN86_c2_g1;TRINITY_DN111_c4_g1;TRINITY_DN257_c2_g1;TRINITY_DN262_c1_g1;TRINITY_DN331_c0_g1;TRINITY_DN331_c0_g2;TRINITY_DN331_c0_g3;TRINITY_DN320_c0_g1;TRINITY_DN405_c2_g1;TRINITY_DN488_c0_g1;TRINITY_DN404_c0_g1;TRINITY_DN516_c0_g1;TRINITY_DN559_c0_g1;TRINITY_DN530_c1_g1;TRINITY_DN674_c1_g1;TRINITY_DN617_c0_g1;TRINITY_DN644_c1_g1;TRI…
structural constituent of cytoskeleton	molecular_function	GO:0005200	195	TRINITY_DN39_c1_g2;TRINITY_DN56_c2_g2;TRINITY_DN49_c2_g1;TRINITY_DN129_c0_g1;TRINITY_DN121_c0_g1;TRINITY_DN187_c0_g1;TRINITY_DN205_c2_g1;TRINITY_DN316_c0_g1;TRINITY_DN527_c0_g1;TRINITY_DN527_c0_g2;TRINITY_DN779_c4_g1;TRINITY_DN733_c0_g1;TRINITY_DN768_c0_g2;TRINITY_DN957_c0_g1;TRINITY_DN1154_c4_g1;TRINITY_DN1154_c1_g2;TRINITY_DN1271_c0_g1;TRINITY_DN1344_c0_g1;TRINITY_DN1344_c0_g2;TRINITY_DN1376_c0…
glucose metabolic process	biological_process	GO:0006006	195	TRINITY_DN70_c1_g1;TRINITY_DN21_c1_g1;TRINITY_DN20_c0_g1;TRINITY_DN8_c0_g1;TRINITY_DN123_c0_g1;TRINITY_DN176_c4_g1;TRINITY_DN223_c0_g1;TRINITY_DN223_c0_g2;TRINITY_DN202_c1_g1;TRINITY_DN297_c3_g1;TRINITY_DN236_c0_g1;TRINITY_DN302_c0_g1;TRINITY_DN314_c1_g1;TRINITY_DN376_c0_g1;TRINITY_DN843_c3_g2;TRINITY_DN895_c0_g1;TRINITY_DN944_c0_g1;TRINITY_DN944_c0_g2;TRINITY_DN906_c2_g1;TRINITY_DN1077_c1_g1;TRI…
ruffle membrane	cellular_component	GO:0032587	194	TRINITY_DN45_c0_g1;TRINITY_DN120_c2_g1;TRINITY_DN176_c2_g2;TRINITY_DN176_c3_g1;TRINITY_DN121_c0_g1;TRINITY_DN258_c2_g1;TRINITY_DN331_c0_g1;TRINITY_DN372_c1_g1;TRINITY_DN492_c1_g2;TRINITY_DN447_c0_g2;TRINITY_DN459_c0_g1;TRINITY_DN514_c0_g4;TRINITY_DN512_c0_g1;TRINITY_DN545_c0_g1;TRINITY_DN576_c0_g3;TRINITY_DN958_c0_g2;TRINITY_DN944_c0_g2;TRINITY_DN1171_c1_g2;TRINITY_DN1312_c0_g1;TRINITY_DN1392_c0_…
early endosome membrane	cellular_component	GO:0031901	193	TRINITY_DN124_c0_g1;TRINITY_DN214_c0_g1;TRINITY_DN267_c2_g1;TRINITY_DN372_c7_g1;TRINITY_DN414_c0_g4;TRINITY_DN414_c0_g6;TRINITY_DN469_c1_g1;TRINITY_DN512_c0_g4;TRINITY_DN538_c0_g1;TRINITY_DN570_c0_g1;TRINITY_DN570_c0_g2;TRINITY_DN621_c0_g1;TRINITY_DN823_c1_g1;TRINITY_DN849_c3_g1;TRINITY_DN908_c0_g1;TRINITY_DN1171_c1_g2;TRINITY_DN1206_c1_g1;TRINITY_DN1200_c2_g1;TRINITY_DN1390_c2_g3;TRINITY_DN1342_…
vesicle	cellular_component	GO:0031982	193	TRINITY_DN40_c0_g1;TRINITY_DN151_c2_g3;TRINITY_DN114_c0_g2;TRINITY_DN146_c0_g1;TRINITY_DN297_c0_g1;TRINITY_DN288_c6_g1;TRINITY_DN312_c1_g2;TRINITY_DN312_c1_g1;TRINITY_DN332_c3_g1;TRINITY_DN315_c0_g2;TRINITY_DN404_c2_g1;TRINITY_DN519_c0_g1;TRINITY_DN503_c0_g1;TRINITY_DN643_c1_g1;TRINITY_DN897_c0_g1;TRINITY_DN850_c0_g1;TRINITY_DN850_c0_g2;TRINITY_DN901_c1_g1;TRINITY_DN944_c0_g1;TRINITY_DN908_c0_g1;…
multicellular organism growth	biological_process	GO:0035264	193	TRINITY_DN92_c0_g1;TRINITY_DN70_c2_g1;TRINITY_DN96_c0_g1;TRINITY_DN103_c1_g1;TRINITY_DN125_c3_g1;TRINITY_DN125_c3_g2;TRINITY_DN176_c3_g1;TRINITY_DN200_c0_g1;TRINITY_DN392_c0_g1;TRINITY_DN398_c0_g1;TRINITY_DN398_c0_g2;TRINITY_DN458_c2_g1;TRINITY_DN402_c1_g1;TRINITY_DN582_c1_g1;TRINITY_DN552_c1_g2;TRINITY_DN576_c0_g3;TRINITY_DN682_c2_g1;TRINITY_DN672_c0_g1;TRINITY_DN730_c0_g1;TRINITY_DN703_c1_g1;TR…
positive regulation of canonical Wnt signaling pathway	biological_process	GO:0090263	192	TRINITY_DN86_c3_g2;TRINITY_DN153_c1_g1;TRINITY_DN162_c0_g1;TRINITY_DN216_c1_g1;TRINITY_DN240_c0_g1;TRINITY_DN222_c0_g1;TRINITY_DN222_c0_g2;TRINITY_DN373_c0_g1;TRINITY_DN420_c1_g1;TRINITY_DN562_c1_g2;TRINITY_DN510_c0_g2;TRINITY_DN548_c5_g2;TRINITY_DN682_c1_g2;TRINITY_DN703_c1_g1;TRINITY_DN756_c0_g2;TRINITY_DN845_c0_g1;TRINITY_DN849_c0_g2;TRINITY_DN849_c0_g3;TRINITY_DN1031_c0_g1;TRINITY_DN1031_c0_g…
spliceosomal complex	cellular_component	GO:0005681	192	TRINITY_DN74_c1_g1;TRINITY_DN86_c2_g1;TRINITY_DN150_c1_g1;TRINITY_DN165_c0_g1;TRINITY_DN200_c4_g1;TRINITY_DN291_c1_g1;TRINITY_DN220_c0_g1;TRINITY_DN331_c0_g1;TRINITY_DN331_c0_g2;TRINITY_DN331_c0_g3;TRINITY_DN316_c0_g1;TRINITY_DN348_c1_g1;TRINITY_DN320_c0_g1;TRINITY_DN408_c0_g1;TRINITY_DN404_c0_g1;TRINITY_DN443_c0_g1;TRINITY_DN516_c0_g1;TRINITY_DN548_c1_g1;TRINITY_DN665_c0_g2;TRINITY_DN774_c0_g1;T…
cellular response to lipopolysaccharide	biological_process	GO:0071222	192	TRINITY_DN15_c0_g1;TRINITY_DN76_c11_g1;TRINITY_DN13_c0_g2;TRINITY_DN180_c0_g2;TRINITY_DN159_c1_g1;TRINITY_DN265_c0_g1;TRINITY_DN217_c0_g3;TRINITY_DN277_c0_g1;TRINITY_DN319_c0_g2;TRINITY_DN372_c2_g1;TRINITY_DN516_c0_g1;TRINITY_DN592_c0_g1;TRINITY_DN612_c0_g1;TRINITY_DN770_c0_g1;TRINITY_DN704_c0_g1;TRINITY_DN772_c0_g1;TRINITY_DN901_c1_g1;TRINITY_DN924_c0_g1;TRINITY_DN1345_c2_g1;TRINITY_DN1351_c3_g1…
positive regulation of defense response to virus by host	biological_process	GO:0002230	192	TRINITY_DN45_c0_g1;TRINITY_DN108_c1_g1;TRINITY_DN130_c2_g1;TRINITY_DN121_c0_g1;TRINITY_DN223_c0_g2;TRINITY_DN251_c12_g1;TRINITY_DN263_c0_g1;TRINITY_DN337_c0_g1;TRINITY_DN337_c0_g2;TRINITY_DN337_c0_g3;TRINITY_DN350_c0_g1;TRINITY_DN491_c5_g1;TRINITY_DN546_c2_g1;TRINITY_DN582_c16_g1;TRINITY_DN692_c0_g2;TRINITY_DN675_c0_g1;TRINITY_DN622_c6_g1;TRINITY_DN784_c0_g1;TRINITY_DN784_c0_g2;TRINITY_DN736_c0_g…
osteoblast differentiation	biological_process	GO:0001649	191	TRINITY_DN48_c1_g1;TRINITY_DN179_c0_g1;TRINITY_DN178_c2_g1;TRINITY_DN216_c1_g1;TRINITY_DN263_c2_g1;TRINITY_DN352_c4_g1;TRINITY_DN435_c1_g3;TRINITY_DN478_c1_g1;TRINITY_DN404_c0_g1;TRINITY_DN427_c0_g1;TRINITY_DN512_c0_g1;TRINITY_DN512_c0_g2;TRINITY_DN582_c1_g1;TRINITY_DN594_c2_g1;TRINITY_DN517_c0_g1;TRINITY_DN617_c0_g1;TRINITY_DN770_c0_g1;TRINITY_DN732_c0_g2;TRINITY_DN765_c0_g1;TRINITY_DN821_c0_g1;…
RNA polymerase II transcription factor activity, sequence-specific DNA binding	molecular_function	GO:0000981	191	TRINITY_DN165_c1_g4;TRINITY_DN187_c0_g1;TRINITY_DN178_c1_g1;TRINITY_DN319_c0_g1;TRINITY_DN319_c0_g2;TRINITY_DN345_c0_g2;TRINITY_DN361_c0_g1;TRINITY_DN510_c0_g2;TRINITY_DN508_c0_g3;TRINITY_DN713_c0_g1;TRINITY_DN782_c3_g1;TRINITY_DN858_c0_g1;TRINITY_DN892_c0_g1;TRINITY_DN1041_c0_g1;TRINITY_DN1050_c2_g1;TRINITY_DN1080_c0_g1;TRINITY_DN1100_c1_g1;TRINITY_DN1164_c0_g1;TRINITY_DN1153_c0_g1;TRINITY_DN128…
regulation of immune response	biological_process	GO:0050776	191	TRINITY_DN76_c0_g1;TRINITY_DN416_c1_g1;TRINITY_DN796_c0_g1;TRINITY_DN779_c0_g1;TRINITY_DN1033_c0_g1;TRINITY_DN1102_c0_g2;TRINITY_DN1299_c0_g4;TRINITY_DN1299_c2_g1;TRINITY_DN1299_c0_g1;TRINITY_DN1299_c0_g3;TRINITY_DN1391_c1_g1;TRINITY_DN1313_c2_g2;TRINITY_DN1313_c1_g1;TRINITY_DN1313_c0_g1;TRINITY_DN1775_c0_g2;TRINITY_DN1740_c0_g2;TRINITY_DN1959_c2_g2;TRINITY_DN1959_c2_g1;TRINITY_DN2083_c1_g3;TRINI…
peptidase activity	molecular_function	GO:0008233	190	TRINITY_DN259_c4_g2;TRINITY_DN291_c0_g1;TRINITY_DN252_c0_g2;TRINITY_DN494_c2_g2;TRINITY_DN560_c0_g1;TRINITY_DN530_c1_g2;TRINITY_DN522_c0_g1;TRINITY_DN543_c1_g1;TRINITY_DN582_c1_g1;TRINITY_DN693_c0_g1;TRINITY_DN749_c0_g1;TRINITY_DN860_c0_g1;TRINITY_DN954_c0_g2;TRINITY_DN973_c0_g1;TRINITY_DN973_c0_g2;TRINITY_DN1017_c1_g2;TRINITY_DN1030_c0_g1;TRINITY_DN1080_c2_g2;TRINITY_DN1084_c1_g1;TRINITY_DN1239_…
late endosome membrane	cellular_component	GO:0031902	190	TRINITY_DN83_c1_g1;TRINITY_DN78_c12_g1;TRINITY_DN38_c1_g1;TRINITY_DN94_c0_g1;TRINITY_DN322_c1_g1;TRINITY_DN403_c1_g1;TRINITY_DN416_c1_g1;TRINITY_DN476_c1_g1;TRINITY_DN538_c0_g1;TRINITY_DN503_c0_g1;TRINITY_DN615_c0_g1;TRINITY_DN704_c0_g1;TRINITY_DN787_c0_g2;TRINITY_DN787_c0_g3;TRINITY_DN712_c6_g1;TRINITY_DN809_c0_g1;TRINITY_DN901_c1_g1;TRINITY_DN901_c2_g1;TRINITY_DN923_c2_g1;TRINITY_DN1012_c0_g1;T…
liver development	biological_process	GO:0001889	189	TRINITY_DN47_c0_g1;TRINITY_DN29_c5_g1;TRINITY_DN62_c2_g1;TRINITY_DN165_c0_g2;TRINITY_DN176_c0_g1;TRINITY_DN178_c1_g1;TRINITY_DN284_c0_g1;TRINITY_DN265_c1_g1;TRINITY_DN251_c3_g1;TRINITY_DN329_c0_g1;TRINITY_DN583_c0_g1;TRINITY_DN582_c0_g2;TRINITY_DN678_c3_g1;TRINITY_DN686_c0_g1;TRINITY_DN691_c0_g1;TRINITY_DN703_c1_g1;TRINITY_DN836_c0_g1;TRINITY_DN802_c0_g1;TRINITY_DN963_c0_g1;TRINITY_DN938_c0_g1;TR…
ion transmembrane transport	biological_process	GO:0034220	189	TRINITY_DN77_c0_g1;TRINITY_DN76_c0_g5;TRINITY_DN87_c0_g4;TRINITY_DN87_c0_g1;TRINITY_DN258_c7_g1;TRINITY_DN271_c1_g1;TRINITY_DN225_c0_g1;TRINITY_DN467_c0_g1;TRINITY_DN455_c0_g1;TRINITY_DN566_c0_g3;TRINITY_DN631_c0_g1;TRINITY_DN657_c0_g1;TRINITY_DN619_c0_g1;TRINITY_DN739_c0_g5;TRINITY_DN784_c0_g1;TRINITY_DN775_c0_g2;TRINITY_DN712_c6_g1;TRINITY_DN859_c0_g1;TRINITY_DN1014_c0_g1;TRINITY_DN1084_c1_g1;T…
ciliary basal body	cellular_component	GO:0036064	188	TRINITY_DN21_c3_g1;TRINITY_DN62_c2_g1;TRINITY_DN45_c0_g1;TRINITY_DN112_c1_g2;TRINITY_DN112_c1_g1;TRINITY_DN188_c0_g2;TRINITY_DN156_c1_g1;TRINITY_DN218_c0_g1;TRINITY_DN389_c0_g1;TRINITY_DN356_c0_g2;TRINITY_DN440_c1_g1;TRINITY_DN552_c3_g1;TRINITY_DN742_c2_g1;TRINITY_DN793_c0_g1;TRINITY_DN844_c0_g1;TRINITY_DN910_c0_g1;TRINITY_DN944_c0_g1;TRINITY_DN1193_c0_g1;TRINITY_DN1271_c0_g1;TRINITY_DN1376_c0_g1…
protein transporter activity	molecular_function	GO:0008565	188	TRINITY_DN98_c0_g1;TRINITY_DN0_c4_g1;TRINITY_DN180_c0_g1;TRINITY_DN360_c0_g1;TRINITY_DN339_c1_g1;TRINITY_DN418_c0_g1;TRINITY_DN508_c2_g1;TRINITY_DN629_c0_g1;TRINITY_DN656_c0_g2;TRINITY_DN773_c0_g1;TRINITY_DN733_c1_g1;TRINITY_DN826_c0_g1;TRINITY_DN834_c1_g1;TRINITY_DN919_c0_g1;TRINITY_DN1001_c1_g1;TRINITY_DN1172_c0_g1;TRINITY_DN1239_c1_g1;TRINITY_DN1264_c5_g2;TRINITY_DN1217_c0_g1;TRINITY_DN1328_c2…
response to virus	biological_process	GO:0009615	188	TRINITY_DN45_c0_g1;TRINITY_DN11_c3_g1;TRINITY_DN184_c2_g1;TRINITY_DN110_c4_g1;TRINITY_DN310_c0_g1;TRINITY_DN348_c1_g1;TRINITY_DN400_c0_g5;TRINITY_DN400_c0_g1;TRINITY_DN579_c0_g1;TRINITY_DN579_c0_g3;TRINITY_DN667_c0_g1;TRINITY_DN909_c1_g1;TRINITY_DN1049_c0_g1;TRINITY_DN1121_c0_g2;TRINITY_DN1121_c0_g3;TRINITY_DN1213_c12_g1;TRINITY_DN1211_c0_g1;TRINITY_DN1579_c0_g1;TRINITY_DN1578_c6_g2;TRINITY_DN157…
protein tyrosine phosphatase activity	molecular_function	GO:0004725	188	TRINITY_DN10_c0_g1;TRINITY_DN10_c0_g2;TRINITY_DN0_c28_g2;TRINITY_DN237_c3_g1;TRINITY_DN203_c0_g1;TRINITY_DN203_c0_g2;TRINITY_DN351_c1_g1;TRINITY_DN475_c10_g1;TRINITY_DN448_c28_g1;TRINITY_DN524_c1_g1;TRINITY_DN831_c0_g1;TRINITY_DN849_c3_g1;TRINITY_DN1027_c0_g1;TRINITY_DN1197_c0_g1;TRINITY_DN1254_c0_g1;TRINITY_DN1462_c0_g1;TRINITY_DN1419_c0_g1;TRINITY_DN1502_c0_g1;TRINITY_DN1599_c0_g1;TRINITY_DN163…
Rho guanyl-nucleotide exchange factor activity	molecular_function	GO:0005089	187	TRINITY_DN65_c0_g1;TRINITY_DN65_c0_g2;TRINITY_DN65_c0_g3;TRINITY_DN103_c0_g1;TRINITY_DN263_c2_g1;TRINITY_DN220_c16_g1;TRINITY_DN312_c0_g1;TRINITY_DN416_c0_g1;TRINITY_DN632_c0_g1;TRINITY_DN600_c0_g1;TRINITY_DN609_c0_g1;TRINITY_DN754_c0_g1;TRINITY_DN739_c1_g1;TRINITY_DN791_c0_g1;TRINITY_DN970_c0_g1;TRINITY_DN901_c5_g1;TRINITY_DN1094_c0_g1;TRINITY_DN1171_c1_g2;TRINITY_DN1285_c0_g2;TRINITY_DN1294_c0_…
phosphatidylinositol binding	molecular_function	GO:0035091	186	TRINITY_DN78_c0_g2;TRINITY_DN99_c2_g1;TRINITY_DN188_c1_g1;TRINITY_DN288_c6_g1;TRINITY_DN423_c0_g1;TRINITY_DN538_c0_g1;TRINITY_DN505_c0_g1;TRINITY_DN569_c7_g1;TRINITY_DN582_c2_g1;TRINITY_DN631_c0_g1;TRINITY_DN621_c0_g1;TRINITY_DN823_c1_g1;TRINITY_DN1267_c0_g1;TRINITY_DN1267_c1_g3;TRINITY_DN1267_c1_g5;TRINITY_DN1267_c1_g4;TRINITY_DN1221_c0_g1;TRINITY_DN1320_c0_g3;TRINITY_DN1364_c0_g1;TRINITY_DN1396…
autophagy	biological_process	GO:0006914	185	TRINITY_DN29_c5_g1;TRINITY_DN200_c1_g2;TRINITY_DN200_c1_g1;TRINITY_DN291_c0_g1;TRINITY_DN211_c0_g1;TRINITY_DN387_c2_g1;TRINITY_DN327_c1_g1;TRINITY_DN452_c0_g1;TRINITY_DN409_c0_g1;TRINITY_DN497_c0_g1;TRINITY_DN417_c0_g1;TRINITY_DN595_c1_g1;TRINITY_DN543_c1_g1;TRINITY_DN572_c0_g1;TRINITY_DN534_c0_g1;TRINITY_DN681_c0_g1;TRINITY_DN640_c0_g2;TRINITY_DN662_c0_g1;TRINITY_DN615_c0_g1;TRINITY_DN653_c3_g1;…
extrinsic component of membrane	cellular_component	GO:0019898	185	TRINITY_DN12_c0_g1;TRINITY_DN78_c0_g2;TRINITY_DN41_c0_g2;TRINITY_DN230_c5_g1;TRINITY_DN270_c0_g2;TRINITY_DN330_c0_g1;TRINITY_DN374_c0_g1;TRINITY_DN540_c0_g3;TRINITY_DN527_c0_g1;TRINITY_DN527_c0_g2;TRINITY_DN527_c1_g1;TRINITY_DN695_c0_g2;TRINITY_DN621_c0_g1;TRINITY_DN650_c0_g1;TRINITY_DN632_c1_g1;TRINITY_DN823_c1_g1;TRINITY_DN897_c0_g1;TRINITY_DN908_c0_g1;TRINITY_DN1025_c0_g1;TRINITY_DN1060_c0_g1;…
post-embryonic development	biological_process	GO:0009791	185	TRINITY_DN92_c0_g1;TRINITY_DN29_c5_g1;TRINITY_DN13_c2_g2;TRINITY_DN13_c2_g1;TRINITY_DN143_c0_g1;TRINITY_DN128_c4_g1;TRINITY_DN176_c3_g1;TRINITY_DN110_c4_g1;TRINITY_DN220_c1_g1;TRINITY_DN302_c0_g1;TRINITY_DN319_c1_g2;TRINITY_DN328_c2_g2;TRINITY_DN426_c0_g1;TRINITY_DN481_c1_g4;TRINITY_DN494_c2_g2;TRINITY_DN494_c1_g1;TRINITY_DN482_c1_g4;TRINITY_DN485_c1_g1;TRINITY_DN512_c0_g2;TRINITY_DN501_c4_g1;TRI…
histone binding	molecular_function	GO:0042393	184	TRINITY_DN46_c3_g1;TRINITY_DN0_c13_g1;TRINITY_DN187_c0_g1;TRINITY_DN319_c2_g1;TRINITY_DN525_c0_g1;TRINITY_DN586_c0_g5;TRINITY_DN586_c0_g1;TRINITY_DN586_c1_g1;TRINITY_DN508_c7_g1;TRINITY_DN626_c0_g1;TRINITY_DN630_c0_g1;TRINITY_DN649_c0_g2;TRINITY_DN720_c0_g1;TRINITY_DN801_c0_g1;TRINITY_DN906_c1_g2;TRINITY_DN906_c1_g1;TRINITY_DN1033_c0_g1;TRINITY_DN1102_c0_g1;TRINITY_DN1205_c3_g1;TRINITY_DN1221_c1_…
calcium ion transport	biological_process	GO:0006816	184	TRINITY_DN62_c2_g1;TRINITY_DN296_c3_g1;TRINITY_DN258_c7_g1;TRINITY_DN378_c0_g1;TRINITY_DN406_c0_g1;TRINITY_DN455_c0_g1;TRINITY_DN751_c0_g1;TRINITY_DN885_c0_g2;TRINITY_DN859_c0_g1;TRINITY_DN802_c0_g1;TRINITY_DN1083_c1_g1;TRINITY_DN1080_c2_g1;TRINITY_DN1158_c1_g1;TRINITY_DN1222_c1_g1;TRINITY_DN1311_c0_g1;TRINITY_DN1647_c2_g1;TRINITY_DN1685_c0_g1;TRINITY_DN1753_c0_g1;TRINITY_DN1857_c0_g1;TRINITY_DN1…
kidney development	biological_process	GO:0001822	182	TRINITY_DN96_c0_g1;TRINITY_DN128_c4_g1;TRINITY_DN110_c4_g1;TRINITY_DN220_c0_g1;TRINITY_DN512_c0_g2;TRINITY_DN501_c4_g1;TRINITY_DN638_c0_g1;TRINITY_DN638_c1_g1;TRINITY_DN802_c0_g1;TRINITY_DN941_c0_g1;TRINITY_DN1027_c0_g1;TRINITY_DN1146_c0_g2;TRINITY_DN1308_c0_g2;TRINITY_DN1361_c0_g1;TRINITY_DN1486_c0_g2;TRINITY_DN1575_c1_g1;TRINITY_DN1506_c4_g1;TRINITY_DN1541_c0_g3;TRINITY_DN1697_c0_g2;TRINITY_DN1…
kinase activity	molecular_function	GO:0016301	182	TRINITY_DN49_c1_g1;TRINITY_DN344_c1_g1;TRINITY_DN769_c0_g1;TRINITY_DN944_c0_g1;TRINITY_DN1268_c0_g1;TRINITY_DN1328_c5_g1;TRINITY_DN1328_c5_g2;TRINITY_DN1365_c0_g2;TRINITY_DN1544_c1_g2;TRINITY_DN1541_c0_g3;TRINITY_DN1552_c1_g1;TRINITY_DN1647_c2_g1;TRINITY_DN1619_c0_g1;TRINITY_DN1902_c1_g1;TRINITY_DN2012_c0_g2;TRINITY_DN2252_c0_g1;TRINITY_DN2303_c0_g3;TRINITY_DN2366_c2_g1;TRINITY_DN2439_c1_g1;TRINI…
negative regulation of cell growth	biological_process	GO:0030308	182	TRINITY_DN125_c2_g1;TRINITY_DN111_c12_g1;TRINITY_DN277_c0_g2;TRINITY_DN314_c0_g1;TRINITY_DN381_c3_g1;TRINITY_DN303_c0_g1;TRINITY_DN477_c0_g3;TRINITY_DN452_c0_g1;TRINITY_DN420_c0_g1;TRINITY_DN543_c0_g2;TRINITY_DN591_c1_g1;TRINITY_DN638_c1_g1;TRINITY_DN705_c2_g1;TRINITY_DN705_c0_g1;TRINITY_DN785_c2_g1;TRINITY_DN845_c0_g1;TRINITY_DN1100_c3_g1;TRINITY_DN1172_c0_g3;TRINITY_DN1102_c0_g2;TRINITY_DN1205_…
Fc-gamma receptor signaling pathway involved in phagocytosis	biological_process	GO:0038096	182	TRINITY_DN56_c2_g2;TRINITY_DN1299_c0_g4;TRINITY_DN1299_c2_g1;TRINITY_DN1299_c0_g1;TRINITY_DN1299_c0_g3;TRINITY_DN1391_c1_g1;TRINITY_DN1313_c2_g2;TRINITY_DN1313_c1_g1;TRINITY_DN1313_c0_g1;TRINITY_DN1719_c0_g1;TRINITY_DN2065_c1_g1;TRINITY_DN2045_c4_g1;TRINITY_DN2089_c2_g1;TRINITY_DN2176_c0_g1;TRINITY_DN2392_c6_g1;TRINITY_DN2366_c2_g1;TRINITY_DN2551_c0_g1;TRINITY_DN2879_c0_g1;TRINITY_DN3117_c3_g1;TR…
protein deubiquitination	biological_process	GO:0016579	181	TRINITY_DN76_c0_g4;TRINITY_DN76_c0_g2;TRINITY_DN28_c0_g2;TRINITY_DN192_c0_g4;TRINITY_DN192_c0_g5;TRINITY_DN162_c0_g1;TRINITY_DN139_c0_g1;TRINITY_DN227_c0_g1;TRINITY_DN245_c3_g1;TRINITY_DN482_c1_g4;TRINITY_DN422_c0_g1;TRINITY_DN422_c0_g2;TRINITY_DN422_c0_g3;TRINITY_DN596_c3_g1;TRINITY_DN635_c0_g1;TRINITY_DN764_c3_g1;TRINITY_DN1068_c1_g2;TRINITY_DN1124_c0_g1;TRINITY_DN1396_c0_g1;TRINITY_DN1316_c0_g…
guanyl-nucleotide exchange factor activity	molecular_function	GO:0005085	181	TRINITY_DN65_c0_g1;TRINITY_DN65_c0_g2;TRINITY_DN65_c0_g3;TRINITY_DN0_c15_g1;TRINITY_DN258_c3_g1;TRINITY_DN220_c16_g1;TRINITY_DN312_c0_g1;TRINITY_DN354_c6_g1;TRINITY_DN505_c0_g1;TRINITY_DN695_c3_g1;TRINITY_DN632_c0_g1;TRINITY_DN668_c0_g1;TRINITY_DN636_c0_g2;TRINITY_DN785_c2_g1;TRINITY_DN788_c0_g1;TRINITY_DN901_c5_g1;TRINITY_DN952_c0_g1;TRINITY_DN1086_c0_g1;TRINITY_DN1086_c0_g2;TRINITY_DN1064_c0_g2…
cytoplasmic mRNA processing body	cellular_component	GO:0000932	180	TRINITY_DN14_c0_g1;TRINITY_DN23_c2_g1;TRINITY_DN396_c2_g2;TRINITY_DN395_c0_g1;TRINITY_DN301_c1_g1;TRINITY_DN426_c0_g1;TRINITY_DN426_c0_g2;TRINITY_DN426_c0_g3;TRINITY_DN440_c0_g1;TRINITY_DN437_c0_g1;TRINITY_DN552_c1_g2;TRINITY_DN789_c0_g1;TRINITY_DN758_c0_g1;TRINITY_DN712_c2_g1;TRINITY_DN825_c1_g1;TRINITY_DN976_c0_g1;TRINITY_DN942_c1_g1;TRINITY_DN1213_c12_g1;TRINITY_DN1332_c0_g1;TRINITY_DN1390_c2_…
positive regulation of NF-kappaB transcription factor activity	biological_process	GO:0051092	179	TRINITY_DN49_c1_g1;TRINITY_DN261_c0_g1;TRINITY_DN217_c0_g3;TRINITY_DN362_c0_g1;TRINITY_DN379_c2_g2;TRINITY_DN538_c1_g2;TRINITY_DN525_c0_g1;TRINITY_DN694_c0_g1;TRINITY_DN742_c1_g1;TRINITY_DN879_c0_g1;TRINITY_DN879_c0_g2;TRINITY_DN842_c0_g1;TRINITY_DN987_c0_g1;TRINITY_DN904_c5_g1;TRINITY_DN923_c0_g1;TRINITY_DN1028_c0_g1;TRINITY_DN1077_c0_g1;TRINITY_DN1186_c0_g1;TRINITY_DN1289_c0_g1;TRINITY_DN1250_c…
NAD binding	molecular_function	GO:0051287	178	TRINITY_DN145_c2_g1;TRINITY_DN236_c0_g1;TRINITY_DN302_c0_g1;TRINITY_DN468_c0_g1;TRINITY_DN668_c1_g1;TRINITY_DN723_c2_g1;TRINITY_DN840_c0_g1;TRINITY_DN985_c2_g1;TRINITY_DN1176_c0_g1;TRINITY_DN1213_c0_g1;TRINITY_DN1213_c0_g3;TRINITY_DN1392_c1_g1;TRINITY_DN1539_c3_g1;TRINITY_DN1681_c1_g1;TRINITY_DN2226_c12_g1;TRINITY_DN2495_c0_g1;TRINITY_DN2679_c7_g1;TRINITY_DN2887_c0_g1;TRINITY_DN2945_c0_g1;TRINITY…
protein tyrosine kinase activity	molecular_function	GO:0004713	178	TRINITY_DN86_c3_g1;TRINITY_DN86_c3_g3;TRINITY_DN86_c3_g2;TRINITY_DN86_c3_g4;TRINITY_DN86_c1_g1;TRINITY_DN99_c0_g1;TRINITY_DN164_c1_g1;TRINITY_DN387_c4_g1;TRINITY_DN438_c1_g1;TRINITY_DN499_c0_g1;TRINITY_DN483_c0_g1;TRINITY_DN512_c0_g3;TRINITY_DN546_c0_g1;TRINITY_DN572_c1_g1;TRINITY_DN592_c0_g1;TRINITY_DN742_c1_g1;TRINITY_DN715_c0_g1;TRINITY_DN756_c0_g1;TRINITY_DN756_c0_g2;TRINITY_DN1149_c1_g1;TRIN…
chromatin remodeling	biological_process	GO:0006338	177	TRINITY_DN7_c0_g1;TRINITY_DN7_c0_g2;TRINITY_DN110_c4_g1;TRINITY_DN206_c0_g1;TRINITY_DN238_c0_g1;TRINITY_DN233_c0_g1;TRINITY_DN307_c2_g1;TRINITY_DN338_c1_g1;TRINITY_DN426_c1_g1;TRINITY_DN436_c0_g1;TRINITY_DN420_c0_g1;TRINITY_DN414_c0_g1;TRINITY_DN508_c7_g1;TRINITY_DN545_c0_g1;TRINITY_DN605_c6_g1;TRINITY_DN885_c1_g1;TRINITY_DN808_c0_g1;TRINITY_DN819_c0_g1;TRINITY_DN874_c0_g1;TRINITY_DN901_c16_g1;TR…
integrin binding	molecular_function	GO:0005178	177	TRINITY_DN28_c0_g3;TRINITY_DN67_c0_g1;TRINITY_DN195_c0_g1;TRINITY_DN121_c0_g1;TRINITY_DN205_c2_g1;TRINITY_DN221_c0_g1;TRINITY_DN293_c0_g1;TRINITY_DN264_c1_g1;TRINITY_DN316_c2_g3;TRINITY_DN321_c0_g1;TRINITY_DN324_c0_g1;TRINITY_DN471_c0_g1;TRINITY_DN427_c0_g1;TRINITY_DN459_c0_g1;TRINITY_DN545_c0_g1;TRINITY_DN694_c0_g1;TRINITY_DN705_c0_g1;TRINITY_DN726_c1_g1;TRINITY_DN726_c0_g1;TRINITY_DN765_c0_g1;T…
microtubule cytoskeleton organization	biological_process	GO:0000226	177	TRINITY_DN192_c0_g4;TRINITY_DN192_c0_g5;TRINITY_DN100_c1_g1;TRINITY_DN236_c0_g1;TRINITY_DN217_c2_g1;TRINITY_DN387_c2_g1;TRINITY_DN348_c0_g1;TRINITY_DN356_c0_g2;TRINITY_DN430_c0_g1;TRINITY_DN420_c1_g1;TRINITY_DN546_c2_g1;TRINITY_DN561_c1_g2;TRINITY_DN561_c1_g1;TRINITY_DN649_c12_g1;TRINITY_DN671_c0_g1;TRINITY_DN742_c1_g1;TRINITY_DN901_c5_g2;TRINITY_DN1138_c0_g1;TRINITY_DN1252_c0_g1;TRINITY_DN1240_c…
wound healing	biological_process	GO:0042060	177	TRINITY_DN39_c1_g2;TRINITY_DN83_c1_g1;TRINITY_DN13_c0_g1;TRINITY_DN156_c1_g2;TRINITY_DN217_c11_g1;TRINITY_DN217_c0_g3;TRINITY_DN301_c0_g1;TRINITY_DN314_c1_g1;TRINITY_DN333_c0_g1;TRINITY_DN580_c0_g1;TRINITY_DN645_c0_g1;TRINITY_DN645_c0_g2;TRINITY_DN624_c4_g1;TRINITY_DN624_c2_g2;TRINITY_DN619_c0_g1;TRINITY_DN600_c0_g1;TRINITY_DN760_c0_g1;TRINITY_DN780_c0_g1;TRINITY_DN768_c0_g3;TRINITY_DN798_c5_g1;T…
regulation of mitotic cell cycle	biological_process	GO:0007346	176	TRINITY_DN21_c0_g1;TRINITY_DN97_c0_g1;TRINITY_DN8_c1_g1;TRINITY_DN115_c0_g1;TRINITY_DN115_c1_g3;TRINITY_DN395_c1_g1;TRINITY_DN329_c0_g1;TRINITY_DN348_c0_g2;TRINITY_DN333_c0_g1;TRINITY_DN425_c0_g1;TRINITY_DN425_c0_g2;TRINITY_DN513_c0_g1;TRINITY_DN543_c0_g2;TRINITY_DN764_c1_g1;TRINITY_DN798_c5_g1;TRINITY_DN966_c1_g1;TRINITY_DN1024_c1_g2;TRINITY_DN1198_c0_g1;TRINITY_DN1118_c1_g1;TRINITY_DN1149_c1_g1…
Golgi organization	biological_process	GO:0007030	176	TRINITY_DN180_c0_g1;TRINITY_DN104_c0_g1;TRINITY_DN172_c1_g1;TRINITY_DN271_c1_g1;TRINITY_DN320_c1_g1;TRINITY_DN420_c1_g1;TRINITY_DN561_c1_g1;TRINITY_DN566_c0_g3;TRINITY_DN593_c0_g1;TRINITY_DN668_c0_g1;TRINITY_DN744_c0_g1;TRINITY_DN942_c0_g1;TRINITY_DN909_c2_g1;TRINITY_DN983_c3_g1;TRINITY_DN1138_c3_g1;TRINITY_DN1330_c1_g1;TRINITY_DN1324_c0_g1;TRINITY_DN1363_c6_g1;TRINITY_DN1573_c0_g1;TRINITY_DN1608…
ATP-dependent RNA helicase activity	molecular_function	GO:0004004	175	TRINITY_DN14_c0_g1;TRINITY_DN140_c1_g1;TRINITY_DN179_c0_g1;TRINITY_DN220_c1_g1;TRINITY_DN354_c2_g1;TRINITY_DN327_c0_g1;TRINITY_DN654_c1_g1;TRINITY_DN683_c0_g1;TRINITY_DN701_c0_g1;TRINITY_DN722_c0_g1;TRINITY_DN852_c0_g1;TRINITY_DN806_c2_g1;TRINITY_DN866_c5_g1;TRINITY_DN895_c1_g1;TRINITY_DN904_c1_g1;TRINITY_DN990_c4_g1;TRINITY_DN1038_c0_g1;TRINITY_DN1201_c0_g1;TRINITY_DN1201_c0_g2;TRINITY_DN1448_c1…
organelle organization	biological_process	GO:0006996	175	TRINITY_DN29_c5_g1;TRINITY_DN40_c0_g1;TRINITY_DN167_c1_g1;TRINITY_DN112_c1_g1;TRINITY_DN188_c0_g2;TRINITY_DN156_c1_g1;TRINITY_DN356_c0_g2;TRINITY_DN379_c1_g1;TRINITY_DN569_c0_g1;TRINITY_DN684_c1_g1;TRINITY_DN767_c0_g1;TRINITY_DN767_c0_g2;TRINITY_DN751_c0_g1;TRINITY_DN742_c2_g1;TRINITY_DN793_c0_g1;TRINITY_DN872_c3_g1;TRINITY_DN941_c0_g1;TRINITY_DN945_c0_g1;TRINITY_DN1083_c0_g1;TRINITY_DN1181_c1_g1…
transcriptional repressor activity, RNA polymerase II core promoter proximal region sequence-specific binding	molecular_function	GO:0001078	174	TRINITY_DN42_c0_g2;TRINITY_DN45_c1_g1;TRINITY_DN11_c0_g1;TRINITY_DN103_c0_g1;TRINITY_DN165_c1_g3;TRINITY_DN110_c4_g1;TRINITY_DN135_c0_g1;TRINITY_DN230_c4_g2;TRINITY_DN396_c0_g1;TRINITY_DN346_c0_g2;TRINITY_DN319_c0_g2;TRINITY_DN478_c1_g1;TRINITY_DN460_c0_g1;TRINITY_DN439_c1_g2;TRINITY_DN439_c1_g1;TRINITY_DN508_c0_g3;TRINITY_DN679_c1_g1;TRINITY_DN713_c0_g1;TRINITY_DN721_c0_g2;TRINITY_DN820_c0_g1;TR…
cell cycle arrest	biological_process	GO:0007050	174	TRINITY_DN93_c0_g1;TRINITY_DN44_c0_g1;TRINITY_DN62_c2_g1;TRINITY_DN40_c0_g1;TRINITY_DN195_c0_g1;TRINITY_DN201_c0_g1;TRINITY_DN203_c0_g3;TRINITY_DN233_c0_g1;TRINITY_DN452_c0_g1;TRINITY_DN489_c0_g1;TRINITY_DN415_c2_g2;TRINITY_DN500_c1_g1;TRINITY_DN543_c0_g2;TRINITY_DN703_c1_g1;TRINITY_DN823_c0_g1;TRINITY_DN895_c0_g1;TRINITY_DN802_c0_g1;TRINITY_DN1044_c0_g1;TRINITY_DN1024_c1_g2;TRINITY_DN1116_c1_g1;…
microtubule motor activity	molecular_function	GO:0003777	173	TRINITY_DN31_c0_g1;TRINITY_DN297_c0_g1;TRINITY_DN596_c1_g1;TRINITY_DN649_c4_g1;TRINITY_DN796_c0_g2;TRINITY_DN796_c0_g3;TRINITY_DN1170_c1_g1;TRINITY_DN1244_c0_g1;TRINITY_DN1413_c0_g1;TRINITY_DN1455_c3_g1;TRINITY_DN1622_c0_g1;TRINITY_DN1604_c0_g1;TRINITY_DN1604_c0_g2;TRINITY_DN1705_c0_g4;TRINITY_DN1705_c0_g1;TRINITY_DN1705_c0_g2;TRINITY_DN1705_c0_g3;TRINITY_DN1827_c0_g1;TRINITY_DN1889_c0_g3;TRINITY…
Rab GTPase binding	molecular_function	GO:0017137	173	TRINITY_DN95_c2_g1;TRINITY_DN104_c0_g1;TRINITY_DN151_c2_g3;TRINITY_DN121_c0_g1;TRINITY_DN214_c0_g1;TRINITY_DN237_c0_g3;TRINITY_DN270_c0_g1;TRINITY_DN490_c1_g2;TRINITY_DN490_c1_g1;TRINITY_DN428_c1_g1;TRINITY_DN519_c0_g1;TRINITY_DN568_c0_g1;TRINITY_DN570_c0_g1;TRINITY_DN570_c0_g2;TRINITY_DN588_c0_g1;TRINITY_DN695_c3_g1;TRINITY_DN672_c0_g1;TRINITY_DN704_c0_g1;TRINITY_DN754_c0_g1;TRINITY_DN845_c3_g1;…
cell-matrix adhesion	biological_process	GO:0007160	173	TRINITY_DN97_c0_g1;TRINITY_DN13_c0_g2;TRINITY_DN67_c0_g1;TRINITY_DN194_c0_g1;TRINITY_DN264_c1_g1;TRINITY_DN336_c0_g1;TRINITY_DN316_c2_g3;TRINITY_DN324_c0_g1;TRINITY_DN496_c1_g1;TRINITY_DN428_c4_g1;TRINITY_DN561_c0_g2;TRINITY_DN545_c0_g1;TRINITY_DN618_c0_g1;TRINITY_DN694_c0_g1;TRINITY_DN705_c0_g1;TRINITY_DN769_c0_g1;TRINITY_DN834_c1_g1;TRINITY_DN939_c1_g1;TRINITY_DN1131_c0_g1;TRINITY_DN1312_c0_g1;…
platelet activation	biological_process	GO:0030168	172	TRINITY_DN152_c0_g2;TRINITY_DN259_c1_g1;TRINITY_DN268_c0_g1;TRINITY_DN251_c9_g1;TRINITY_DN229_c0_g1;TRINITY_DN336_c0_g1;TRINITY_DN376_c0_g1;TRINITY_DN483_c0_g1;TRINITY_DN555_c0_g1;TRINITY_DN592_c0_g1;TRINITY_DN619_c0_g1;TRINITY_DN670_c0_g1;TRINITY_DN779_c1_g3;TRINITY_DN779_c1_g2;TRINITY_DN716_c0_g1;TRINITY_DN944_c0_g1;TRINITY_DN959_c0_g1;TRINITY_DN906_c2_g1;TRINITY_DN1044_c0_g1;TRINITY_DN1115_c0_…
axonogenesis	biological_process	GO:0007409	171	TRINITY_DN125_c2_g1;TRINITY_DN176_c2_g2;TRINITY_DN214_c0_g1;TRINITY_DN276_c0_g2;TRINITY_DN270_c0_g1;TRINITY_DN217_c0_g3;TRINITY_DN312_c1_g2;TRINITY_DN312_c1_g1;TRINITY_DN373_c0_g1;TRINITY_DN452_c0_g1;TRINITY_DN519_c0_g1;TRINITY_DN533_c1_g1;TRINITY_DN769_c0_g1;TRINITY_DN798_c0_g1;TRINITY_DN885_c0_g3;TRINITY_DN1055_c1_g1;TRINITY_DN1057_c2_g1;TRINITY_DN1172_c0_g3;TRINITY_DN1197_c0_g1;TRINITY_DN1238_…
exocytosis	biological_process	GO:0006887	171	TRINITY_DN167_c1_g1;TRINITY_DN151_c2_g3;TRINITY_DN176_c2_g2;TRINITY_DN191_c1_g1;TRINITY_DN214_c0_g1;TRINITY_DN285_c0_g1;TRINITY_DN288_c6_g1;TRINITY_DN412_c0_g1;TRINITY_DN484_c1_g1;TRINITY_DN591_c1_g2;TRINITY_DN672_c0_g1;TRINITY_DN668_c0_g1;TRINITY_DN780_c0_g1;TRINITY_DN885_c0_g3;TRINITY_DN806_c1_g1;TRINITY_DN887_c0_g1;TRINITY_DN945_c0_g1;TRINITY_DN913_c2_g1;TRINITY_DN1088_c0_g1;TRINITY_DN1066_c0_…
negative regulation of cell migration	biological_process	GO:0030336	171	TRINITY_DN103_c1_g1;TRINITY_DN128_c0_g1;TRINITY_DN238_c1_g1;TRINITY_DN336_c0_g1;TRINITY_DN315_c0_g2;TRINITY_DN497_c1_g1;TRINITY_DN458_c2_g1;TRINITY_DN458_c0_g1;TRINITY_DN575_c0_g1;TRINITY_DN575_c0_g2;TRINITY_DN509_c3_g2;TRINITY_DN520_c3_g1;TRINITY_DN624_c2_g2;TRINITY_DN705_c0_g1;TRINITY_DN739_c1_g1;TRINITY_DN791_c0_g1;TRINITY_DN785_c2_g1;TRINITY_DN780_c0_g1;TRINITY_DN919_c1_g1;TRINITY_DN944_c1_g1…
phospholipid binding	molecular_function	GO:0005543	170	TRINITY_DN5_c0_g1;TRINITY_DN132_c0_g2;TRINITY_DN230_c5_g1;TRINITY_DN374_c0_g1;TRINITY_DN372_c2_g1;TRINITY_DN475_c0_g1;TRINITY_DN564_c1_g1;TRINITY_DN649_c1_g1;TRINITY_DN733_c0_g1;TRINITY_DN780_c5_g1;TRINITY_DN723_c1_g3;TRINITY_DN709_c0_g1;TRINITY_DN908_c0_g1;TRINITY_DN1060_c0_g1;TRINITY_DN1174_c1_g1;TRINITY_DN1159_c0_g1;TRINITY_DN1312_c0_g1;TRINITY_DN1304_c7_g1;TRINITY_DN1598_c1_g2;TRINITY_DN1598_…
tRNA binding	molecular_function	GO:0000049	169	TRINITY_DN77_c0_g1;TRINITY_DN40_c0_g1;TRINITY_DN11_c6_g1;TRINITY_DN164_c2_g1;TRINITY_DN149_c0_g1;TRINITY_DN149_c0_g2;TRINITY_DN258_c2_g1;TRINITY_DN251_c12_g1;TRINITY_DN301_c0_g1;TRINITY_DN309_c0_g1;TRINITY_DN316_c0_g1;TRINITY_DN682_c0_g1;TRINITY_DN1088_c0_g1;TRINITY_DN1093_c0_g1;TRINITY_DN1093_c0_g2;TRINITY_DN1029_c0_g1;TRINITY_DN1217_c0_g1;TRINITY_DN1365_c0_g2;TRINITY_DN1570_c2_g2;TRINITY_DN1570…
ion transport	biological_process	GO:0006811	168	TRINITY_DN83_c1_g1;TRINITY_DN65_c1_g1;TRINITY_DN120_c1_g1;TRINITY_DN110_c0_g1;TRINITY_DN200_c0_g1;TRINITY_DN399_c0_g1;TRINITY_DN493_c1_g1;TRINITY_DN539_c0_g1;TRINITY_DN665_c6_g1;TRINITY_DN867_c0_g1;TRINITY_DN867_c0_g2;TRINITY_DN1088_c0_g1;TRINITY_DN1053_c0_g1;TRINITY_DN1077_c2_g1;TRINITY_DN1080_c2_g1;TRINITY_DN1264_c4_g1;TRINITY_DN1267_c2_g1;TRINITY_DN1304_c11_g2;TRINITY_DN1434_c1_g1;TRINITY_DN15…
organ morphogenesis	biological_process	GO:0009887	168	TRINITY_DN8_c1_g1;TRINITY_DN45_c1_g1;TRINITY_DN33_c3_g2;TRINITY_DN164_c1_g1;TRINITY_DN165_c1_g2;TRINITY_DN110_c4_g1;TRINITY_DN178_c1_g1;TRINITY_DN217_c11_g1;TRINITY_DN217_c0_g3;TRINITY_DN203_c0_g3;TRINITY_DN381_c1_g1;TRINITY_DN319_c0_g1;TRINITY_DN319_c0_g2;TRINITY_DN343_c0_g1;TRINITY_DN471_c0_g1;TRINITY_DN428_c7_g1;TRINITY_DN546_c0_g1;TRINITY_DN561_c0_g2;TRINITY_DN587_c0_g1;TRINITY_DN634_c1_g1;TR…
G1/S transition of mitotic cell cycle	biological_process	GO:0000082	168	TRINITY_DN39_c1_g1;TRINITY_DN181_c0_g1;TRINITY_DN326_c0_g1;TRINITY_DN489_c0_g1;TRINITY_DN543_c0_g2;TRINITY_DN502_c0_g1;TRINITY_DN545_c0_g1;TRINITY_DN548_c5_g2;TRINITY_DN633_c0_g1;TRINITY_DN682_c1_g2;TRINITY_DN603_c0_g1;TRINITY_DN703_c1_g1;TRINITY_DN1005_c1_g1;TRINITY_DN1107_c0_g1;TRINITY_DN1113_c0_g1;TRINITY_DN1268_c0_g1;TRINITY_DN1222_c1_g1;TRINITY_DN1311_c0_g1;TRINITY_DN1362_c0_g1;TRINITY_DN141…
positive regulation of cytosolic calcium ion concentration	biological_process	GO:0007204	167	TRINITY_DN110_c0_g1;TRINITY_DN172_c0_g1;TRINITY_DN251_c9_g1;TRINITY_DN229_c0_g1;TRINITY_DN387_c4_g1;TRINITY_DN365_c0_g2;TRINITY_DN455_c0_g1;TRINITY_DN802_c0_g1;TRINITY_DN1003_c1_g1;TRINITY_DN1156_c3_g1;TRINITY_DN1541_c0_g2;TRINITY_DN1647_c2_g1;TRINITY_DN1676_c0_g1;TRINITY_DN1666_c1_g1;TRINITY_DN1766_c0_g5;TRINITY_DN1766_c0_g1;TRINITY_DN1704_c0_g1;TRINITY_DN1857_c0_g1;TRINITY_DN1973_c0_g1;TRINITY_…
cell-cell signaling	biological_process	GO:0007267	167	TRINITY_DN97_c3_g1;TRINITY_DN86_c3_g2;TRINITY_DN240_c0_g1;TRINITY_DN217_c11_g1;TRINITY_DN217_c0_g3;TRINITY_DN393_c0_g1;TRINITY_DN301_c0_g1;TRINITY_DN319_c0_g1;TRINITY_DN319_c0_g2;TRINITY_DN427_c0_g1;TRINITY_DN582_c1_g1;TRINITY_DN753_c1_g1;TRINITY_DN1065_c2_g1;TRINITY_DN1272_c7_g2;TRINITY_DN1279_c0_g2;TRINITY_DN1285_c3_g1;TRINITY_DN1647_c2_g1;TRINITY_DN1617_c7_g1;TRINITY_DN1636_c1_g1;TRINITY_DN162…
single organismal cell-cell adhesion	biological_process	GO:0016337	167	TRINITY_DN39_c1_g2;TRINITY_DN25_c0_g1;TRINITY_DN108_c2_g1;TRINITY_DN276_c0_g2;TRINITY_DN293_c0_g1;TRINITY_DN322_c4_g1;TRINITY_DN324_c0_g1;TRINITY_DN371_c0_g1;TRINITY_DN496_c1_g1;TRINITY_DN441_c2_g2;TRINITY_DN441_c2_g1;TRINITY_DN427_c0_g1;TRINITY_DN694_c0_g1;TRINITY_DN705_c0_g1;TRINITY_DN760_c0_g1;TRINITY_DN865_c0_g2;TRINITY_DN802_c0_g1;TRINITY_DN1172_c0_g3;TRINITY_DN1178_c2_g1;TRINITY_DN1131_c0_g…
metallopeptidase activity	molecular_function	GO:0008237	167	TRINITY_DN533_c1_g1;TRINITY_DN548_c0_g1;TRINITY_DN634_c0_g1;TRINITY_DN694_c0_g1;TRINITY_DN610_c3_g1;TRINITY_DN705_c0_g1;TRINITY_DN815_c0_g1;TRINITY_DN993_c0_g1;TRINITY_DN1061_c0_g2;TRINITY_DN1030_c0_g1;TRINITY_DN1080_c2_g2;TRINITY_DN1084_c1_g1;TRINITY_DN1106_c0_g1;TRINITY_DN1297_c0_g1;TRINITY_DN1315_c1_g1;TRINITY_DN1361_c0_g1;TRINITY_DN1302_c0_g4;TRINITY_DN1302_c0_g2;TRINITY_DN1548_c0_g2;TRINITY_…
neuron migration	biological_process	GO:0001764	167	TRINITY_DN86_c3_g1;TRINITY_DN86_c3_g3;TRINITY_DN86_c5_g2;TRINITY_DN112_c1_g2;TRINITY_DN112_c1_g1;TRINITY_DN110_c4_g1;TRINITY_DN276_c0_g2;TRINITY_DN301_c0_g1;TRINITY_DN302_c0_g1;TRINITY_DN348_c0_g1;TRINITY_DN494_c2_g2;TRINITY_DN482_c1_g4;TRINITY_DN592_c0_g1;TRINITY_DN783_c1_g1;TRINITY_DN769_c0_g1;TRINITY_DN798_c0_g1;TRINITY_DN804_c1_g1;TRINITY_DN854_c1_g1;TRINITY_DN865_c0_g2;TRINITY_DN923_c1_g1;TR…
neuron differentiation	biological_process	GO:0030182	166	TRINITY_DN125_c3_g1;TRINITY_DN125_c3_g2;TRINITY_DN115_c0_g2;TRINITY_DN110_c4_g1;TRINITY_DN240_c0_g1;TRINITY_DN265_c0_g1;TRINITY_DN265_c4_g1;TRINITY_DN217_c11_g1;TRINITY_DN307_c2_g1;TRINITY_DN481_c1_g4;TRINITY_DN512_c0_g1;TRINITY_DN550_c0_g1;TRINITY_DN654_c0_g1;TRINITY_DN769_c0_g1;TRINITY_DN871_c1_g1;TRINITY_DN899_c0_g1;TRINITY_DN918_c0_g1;TRINITY_DN1022_c0_g1;TRINITY_DN1034_c0_g1;TRINITY_DN1154_c…
double-strand break repair via homologous recombination	biological_process	GO:0000724	166	TRINITY_DN187_c0_g1;TRINITY_DN255_c8_g1;TRINITY_DN217_c0_g1;TRINITY_DN494_c9_g1;TRINITY_DN469_c0_g2;TRINITY_DN685_c0_g2;TRINITY_DN782_c0_g1;TRINITY_DN824_c11_g1;TRINITY_DN932_c1_g2;TRINITY_DN1017_c0_g1;TRINITY_DN1041_c1_g1;TRINITY_DN1042_c0_g1;TRINITY_DN1136_c0_g2;TRINITY_DN1195_c0_g1;TRINITY_DN1113_c1_g1;TRINITY_DN1573_c0_g1;TRINITY_DN1636_c0_g1;TRINITY_DN1827_c0_g1;TRINITY_DN2045_c4_g1;TRINITY_…
anterior/posterior pattern specification	biological_process	GO:0009952	166	TRINITY_DN60_c0_g1;TRINITY_DN13_c2_g2;TRINITY_DN13_c2_g1;TRINITY_DN217_c0_g3;TRINITY_DN301_c0_g1;TRINITY_DN332_c1_g1;TRINITY_DN459_c2_g1;TRINITY_DN561_c0_g2;TRINITY_DN572_c5_g1;TRINITY_DN877_c9_g1;TRINITY_DN919_c1_g1;TRINITY_DN983_c0_g5;TRINITY_DN983_c0_g6;TRINITY_DN983_c0_g1;TRINITY_DN983_c0_g2;TRINITY_DN983_c0_g3;TRINITY_DN1063_c0_g1;TRINITY_DN1063_c0_g2;TRINITY_DN1017_c0_g1;TRINITY_DN1070_c1_g…
mitochondrial membrane	cellular_component	GO:0031966	166	TRINITY_DN48_c1_g1;TRINITY_DN192_c0_g4;TRINITY_DN192_c0_g5;TRINITY_DN184_c1_g2;TRINITY_DN159_c1_g1;TRINITY_DN121_c3_g1;TRINITY_DN182_c0_g1;TRINITY_DN675_c0_g1;TRINITY_DN733_c0_g1;TRINITY_DN837_c3_g2;TRINITY_DN814_c1_g1;TRINITY_DN908_c0_g1;TRINITY_DN1006_c0_g2;TRINITY_DN1065_c1_g1;TRINITY_DN1120_c0_g1;TRINITY_DN1120_c0_g2;TRINITY_DN1295_c0_g2;TRINITY_DN1295_c0_g3;TRINITY_DN1375_c1_g1;TRINITY_DN134…
positive regulation of sequence-specific DNA binding transcription factor activity	biological_process	GO:0051091	164	TRINITY_DN65_c0_g1;TRINITY_DN65_c0_g2;TRINITY_DN65_c0_g3;TRINITY_DN165_c1_g3;TRINITY_DN165_c1_g2;TRINITY_DN187_c0_g1;TRINITY_DN202_c0_g1;TRINITY_DN240_c0_g1;TRINITY_DN205_c1_g1;TRINITY_DN307_c2_g1;TRINITY_DN317_c0_g1;TRINITY_DN460_c0_g1;TRINITY_DN491_c3_g2;TRINITY_DN494_c0_g2;TRINITY_DN500_c1_g1;TRINITY_DN563_c0_g1;TRINITY_DN652_c0_g1;TRINITY_DN675_c0_g1;TRINITY_DN830_c0_g1;TRINITY_DN825_c1_g1;TR…
microtubule-based movement	biological_process	GO:0007018	164	TRINITY_DN596_c1_g1;TRINITY_DN649_c4_g1;TRINITY_DN796_c0_g2;TRINITY_DN796_c0_g3;TRINITY_DN1170_c1_g1;TRINITY_DN1244_c0_g1;TRINITY_DN1413_c0_g1;TRINITY_DN1604_c0_g1;TRINITY_DN1604_c0_g2;TRINITY_DN1726_c0_g1;TRINITY_DN1705_c0_g4;TRINITY_DN1705_c0_g1;TRINITY_DN1705_c0_g3;TRINITY_DN1827_c0_g1;TRINITY_DN1889_c0_g3;TRINITY_DN2038_c0_g4;TRINITY_DN2022_c0_g1;TRINITY_DN2022_c0_g2;TRINITY_DN2161_c0_g2;TRIN…
membrane organization	biological_process	GO:0061024	164	TRINITY_DN39_c1_g1;TRINITY_DN50_c1_g1;TRINITY_DN29_c5_g1;TRINITY_DN167_c1_g1;TRINITY_DN281_c0_g1;TRINITY_DN306_c1_g1;TRINITY_DN514_c0_g4;TRINITY_DN522_c0_g1;TRINITY_DN708_c0_g1;TRINITY_DN716_c0_g1;TRINITY_DN780_c0_g1;TRINITY_DN826_c0_g1;TRINITY_DN894_c0_g2;TRINITY_DN854_c0_g2;TRINITY_DN978_c0_g2;TRINITY_DN945_c0_g1;TRINITY_DN944_c0_g1;TRINITY_DN998_c1_g1;TRINITY_DN1046_c0_g1;TRINITY_DN1122_c0_g5;…
protein localization	biological_process	GO:0008104	163	TRINITY_DN65_c1_g1;TRINITY_DN99_c0_g4;TRINITY_DN143_c0_g1;TRINITY_DN297_c0_g1;TRINITY_DN270_c0_g1;TRINITY_DN319_c1_g2;TRINITY_DN350_c0_g1;TRINITY_DN481_c1_g4;TRINITY_DN492_c0_g2;TRINITY_DN519_c0_g1;TRINITY_DN525_c0_g1;TRINITY_DN659_c0_g1;TRINITY_DN718_c0_g2;TRINITY_DN754_c0_g1;TRINITY_DN802_c0_g1;TRINITY_DN1045_c0_g1;TRINITY_DN1058_c6_g1;TRINITY_DN1083_c0_g2;TRINITY_DN1083_c0_g1;TRINITY_DN1073_c1…
response to glucocorticoid	biological_process	GO:0051384	163	TRINITY_DN78_c6_g1;TRINITY_DN13_c0_g2;TRINITY_DN25_c0_g1;TRINITY_DN164_c1_g1;TRINITY_DN217_c0_g3;TRINITY_DN867_c0_g1;TRINITY_DN986_c0_g1;TRINITY_DN986_c0_g3;TRINITY_DN931_c3_g1;TRINITY_DN908_c0_g1;TRINITY_DN1070_c2_g3;TRINITY_DN1155_c1_g1;TRINITY_DN1167_c0_g1;TRINITY_DN1216_c0_g1;TRINITY_DN1382_c2_g1;TRINITY_DN1487_c1_g1;TRINITY_DN1486_c0_g2;TRINITY_DN1599_c0_g1;TRINITY_DN1613_c0_g1;TRINITY_DN179…
cell redox homeostasis	biological_process	GO:0045454	163	TRINITY_DN38_c1_g1;TRINITY_DN212_c0_g1;TRINITY_DN405_c1_g1;TRINITY_DN603_c2_g2;TRINITY_DN603_c2_g1;TRINITY_DN863_c0_g1;TRINITY_DN908_c2_g1;TRINITY_DN1022_c0_g1;TRINITY_DN1116_c6_g1;TRINITY_DN1330_c0_g1;TRINITY_DN1330_c0_g2;TRINITY_DN1315_c11_g1;TRINITY_DN1403_c0_g1;TRINITY_DN1495_c0_g1;TRINITY_DN1495_c0_g3;TRINITY_DN1498_c0_g1;TRINITY_DN1486_c0_g2;TRINITY_DN1543_c0_g1;TRINITY_DN1661_c1_g1;TRINITY…
nuclear-transcribed mRNA catabolic process, nonsense-mediated decay	biological_process	GO:0000184	162	TRINITY_DN14_c0_g1;TRINITY_DN191_c2_g1;TRINITY_DN209_c0_g2;TRINITY_DN381_c2_g1;TRINITY_DN415_c2_g2;TRINITY_DN432_c0_g1;TRINITY_DN432_c0_g3;TRINITY_DN530_c1_g1;TRINITY_DN989_c3_g1;TRINITY_DN913_c0_g1;TRINITY_DN913_c6_g1;TRINITY_DN1243_c0_g2;TRINITY_DN1328_c5_g1;TRINITY_DN1328_c5_g2;TRINITY_DN1474_c0_g1;TRINITY_DN1661_c0_g2;TRINITY_DN1625_c2_g1;TRINITY_DN1743_c1_g3;TRINITY_DN1948_c0_g1;TRINITY_DN20…
positive regulation of neuron projection development	biological_process	GO:0010976	162	TRINITY_DN68_c1_g1;TRINITY_DN72_c2_g1;TRINITY_DN86_c3_g1;TRINITY_DN86_c3_g3;TRINITY_DN86_c3_g4;TRINITY_DN172_c0_g1;TRINITY_DN202_c0_g1;TRINITY_DN251_c0_g1;TRINITY_DN205_c2_g1;TRINITY_DN217_c0_g3;TRINITY_DN233_c0_g1;TRINITY_DN387_c4_g1;TRINITY_DN373_c0_g1;TRINITY_DN371_c0_g1;TRINITY_DN362_c0_g1;TRINITY_DN545_c0_g1;TRINITY_DN572_c1_g1;TRINITY_DN625_c0_g1;TRINITY_DN612_c0_g1;TRINITY_DN760_c4_g1;TRIN…
lipid metabolic process	biological_process	GO:0006629	161	TRINITY_DN54_c0_g1;TRINITY_DN132_c0_g2;TRINITY_DN182_c0_g1;TRINITY_DN197_c1_g1;TRINITY_DN360_c0_g1;TRINITY_DN322_c7_g2;TRINITY_DN328_c2_g2;TRINITY_DN438_c3_g1;TRINITY_DN410_c0_g1;TRINITY_DN410_c0_g2;TRINITY_DN436_c0_g1;TRINITY_DN677_c1_g1;TRINITY_DN734_c0_g1;TRINITY_DN825_c0_g2;TRINITY_DN839_c0_g1;TRINITY_DN941_c0_g1;TRINITY_DN1071_c0_g1;TRINITY_DN1110_c0_g1;TRINITY_DN1197_c0_g1;TRINITY_DN1210_c0…
single-stranded DNA binding	molecular_function	GO:0003697	161	TRINITY_DN16_c0_g1;TRINITY_DN125_c1_g1;TRINITY_DN165_c0_g1;TRINITY_DN255_c8_g1;TRINITY_DN370_c0_g1;TRINITY_DN322_c7_g2;TRINITY_DN320_c0_g1;TRINITY_DN372_c0_g1;TRINITY_DN730_c0_g1;TRINITY_DN857_c0_g1;TRINITY_DN966_c0_g1;TRINITY_DN990_c1_g1;TRINITY_DN908_c0_g1;TRINITY_DN989_c1_g1;TRINITY_DN1068_c0_g1;TRINITY_DN1264_c2_g1;TRINITY_DN1282_c11_g1;TRINITY_DN1308_c0_g2;TRINITY_DN1362_c0_g1;TRINITY_DN1775…
nucleotide-excision repair	biological_process	GO:0006289	161	TRINITY_DN55_c3_g2;TRINITY_DN192_c0_g5;TRINITY_DN165_c1_g2;TRINITY_DN267_c0_g1;TRINITY_DN498_c0_g2;TRINITY_DN402_c1_g1;TRINITY_DN560_c2_g1;TRINITY_DN607_c0_g1;TRINITY_DN730_c0_g1;TRINITY_DN890_c0_g1;TRINITY_DN890_c0_g3;TRINITY_DN910_c0_g1;TRINITY_DN1014_c0_g1;TRINITY_DN1172_c0_g1;TRINITY_DN1156_c2_g1;TRINITY_DN1709_c0_g1;TRINITY_DN1851_c0_g1;TRINITY_DN1836_c1_g3;TRINITY_DN1931_c0_g1;TRINITY_DN191…
manganese ion binding	molecular_function	GO:0030145	161	TRINITY_DN130_c3_g1;TRINITY_DN242_c2_g1;TRINITY_DN387_c4_g1;TRINITY_DN580_c0_g1;TRINITY_DN582_c0_g4;TRINITY_DN734_c1_g1;TRINITY_DN809_c0_g1;TRINITY_DN920_c0_g1;TRINITY_DN925_c0_g1;TRINITY_DN954_c0_g2;TRINITY_DN1087_c2_g1;TRINITY_DN1005_c0_g1;TRINITY_DN1186_c0_g2;TRINITY_DN1642_c0_g1;TRINITY_DN1864_c0_g1;TRINITY_DN1905_c2_g2;TRINITY_DN2045_c4_g1;TRINITY_DN2017_c2_g1;TRINITY_DN2037_c1_g1;TRINITY_DN…
regulation of cell migration	biological_process	GO:0030334	161	TRINITY_DN74_c0_g1;TRINITY_DN45_c0_g1;TRINITY_DN125_c10_g2;TRINITY_DN125_c2_g1;TRINITY_DN148_c0_g1;TRINITY_DN191_c0_g2;TRINITY_DN251_c9_g1;TRINITY_DN276_c0_g2;TRINITY_DN336_c0_g1;TRINITY_DN333_c0_g1;TRINITY_DN471_c0_g1;TRINITY_DN631_c0_g1;TRINITY_DN772_c6_g1;TRINITY_DN769_c0_g1;TRINITY_DN798_c5_g1;TRINITY_DN712_c9_g1;TRINITY_DN865_c0_g2;TRINITY_DN944_c0_g1;TRINITY_DN1234_c0_g1;TRINITY_DN1267_c0_g…
cellular calcium ion homeostasis	biological_process	GO:0006874	161	TRINITY_DN93_c4_g1;TRINITY_DN75_c1_g1;TRINITY_DN132_c0_g2;TRINITY_DN152_c0_g2;TRINITY_DN152_c0_g3;TRINITY_DN258_c7_g1;TRINITY_DN225_c0_g1;TRINITY_DN378_c0_g1;TRINITY_DN545_c0_g1;TRINITY_DN657_c0_g1;TRINITY_DN751_c0_g1;TRINITY_DN747_c0_g1;TRINITY_DN951_c0_g1;TRINITY_DN1083_c1_g1;TRINITY_DN1158_c1_g1;TRINITY_DN1200_c2_g1;TRINITY_DN1464_c0_g1;TRINITY_DN1504_c0_g2;TRINITY_DN1647_c2_g1;TRINITY_DN1902_…
response to nutrient	biological_process	GO:0007584	161	TRINITY_DN29_c3_g1;TRINITY_DN13_c0_g1;TRINITY_DN277_c0_g1;TRINITY_DN372_c2_g1;TRINITY_DN665_c6_g1;TRINITY_DN730_c0_g1;TRINITY_DN837_c3_g2;TRINITY_DN901_c1_g1;TRINITY_DN1046_c0_g1;TRINITY_DN1070_c2_g3;TRINITY_DN1050_c0_g2;TRINITY_DN1138_c1_g1;TRINITY_DN1275_c0_g2;TRINITY_DN1204_c1_g2;TRINITY_DN1375_c1_g1;TRINITY_DN1345_c2_g1;TRINITY_DN1420_c0_g2;TRINITY_DN1681_c1_g1;TRINITY_DN1653_c0_g1;TRINITY_DN…
transmembrane receptor protein tyrosine kinase signaling pathway	biological_process	GO:0007169	160	TRINITY_DN25_c0_g2;TRINITY_DN164_c0_g1;TRINITY_DN164_c0_g2;TRINITY_DN172_c0_g1;TRINITY_DN252_c0_g1;TRINITY_DN337_c0_g1;TRINITY_DN337_c0_g2;TRINITY_DN337_c0_g3;TRINITY_DN315_c2_g1;TRINITY_DN371_c0_g1;TRINITY_DN563_c0_g1;TRINITY_DN572_c1_g1;TRINITY_DN702_c5_g1;TRINITY_DN742_c1_g1;TRINITY_DN756_c0_g1;TRINITY_DN1202_c0_g1;TRINITY_DN1283_c1_g1;TRINITY_DN1435_c0_g1;TRINITY_DN1472_c1_g1;TRINITY_DN1541_c…
RNA processing	biological_process	GO:0006396	160	TRINITY_DN11_c3_g1;TRINITY_DN122_c0_g1;TRINITY_DN122_c0_g2;TRINITY_DN165_c0_g1;TRINITY_DN165_c0_g2;TRINITY_DN179_c0_g1;TRINITY_DN251_c0_g1;TRINITY_DN349_c0_g1;TRINITY_DN479_c0_g1;TRINITY_DN559_c0_g1;TRINITY_DN575_c0_g1;TRINITY_DN575_c0_g2;TRINITY_DN520_c2_g1;TRINITY_DN617_c0_g1;TRINITY_DN678_c3_g1;TRINITY_DN637_c0_g1;TRINITY_DN683_c0_g1;TRINITY_DN712_c2_g1;TRINITY_DN889_c0_g1;TRINITY_DN806_c2_g1;…
cell outer membrane	cellular_component	GO:0009279	160	TRINITY_DN83_c1_g1;TRINITY_DN1947_c0_g1;TRINITY_DN8369_c0_g1;TRINITY_DN8369_c1_g1;TRINITY_DN9807_c0_g2;TRINITY_DN9807_c0_g9;TRINITY_DN10350_c0_g3;TRINITY_DN10350_c0_g14;TRINITY_DN11160_c0_g7;TRINITY_DN14064_c0_g4;TRINITY_DN15214_c0_g1;TRINITY_DN15214_c0_g8;TRINITY_DN15214_c0_g12;TRINITY_DN15645_c2_g7;TRINITY_DN16748_c0_g3;TRINITY_DN17216_c0_g5;TRINITY_DN17216_c0_g3;TRINITY_DN18468_c0_g12;TRINITY_…
positive regulation of angiogenesis	biological_process	GO:0045766	160	TRINITY_DN111_c12_g1;TRINITY_DN200_c0_g1;TRINITY_DN217_c0_g3;TRINITY_DN362_c0_g1;TRINITY_DN496_c1_g1;TRINITY_DN465_c2_g2;TRINITY_DN465_c2_g1;TRINITY_DN421_c0_g1;TRINITY_DN530_c1_g2;TRINITY_DN645_c0_g1;TRINITY_DN986_c0_g1;TRINITY_DN986_c0_g3;TRINITY_DN1044_c0_g1;TRINITY_DN1078_c1_g3;TRINITY_DN1078_c1_g2;TRINITY_DN1167_c0_g1;TRINITY_DN1363_c1_g1;TRINITY_DN1418_c3_g1;TRINITY_DN1561_c0_g1;TRINITY_DN1…
integrin-mediated signaling pathway	biological_process	GO:0007229	160	TRINITY_DN67_c0_g1;TRINITY_DN156_c2_g1;TRINITY_DN264_c1_g1;TRINITY_DN316_c2_g3;TRINITY_DN471_c0_g1;TRINITY_DN459_c0_g1;TRINITY_DN545_c0_g1;TRINITY_DN705_c0_g1;TRINITY_DN703_c1_g1;TRINITY_DN765_c0_g1;TRINITY_DN834_c1_g1;TRINITY_DN1062_c0_g1;TRINITY_DN1197_c0_g1;TRINITY_DN1202_c0_g1;TRINITY_DN1283_c1_g1;TRINITY_DN1392_c0_g2;TRINITY_DN1677_c0_g1;TRINITY_DN1743_c0_g1;TRINITY_DN1743_c0_g2;TRINITY_DN18…
regulation of small GTPase mediated signal transduction	biological_process	GO:0051056	159	TRINITY_DN97_c2_g1;TRINITY_DN178_c0_g2;TRINITY_DN220_c16_g1;TRINITY_DN367_c0_g1;TRINITY_DN416_c0_g1;TRINITY_DN509_c3_g2;TRINITY_DN564_c1_g1;TRINITY_DN632_c0_g1;TRINITY_DN791_c0_g1;TRINITY_DN802_c0_g1;TRINITY_DN901_c5_g1;TRINITY_DN981_c0_g2;TRINITY_DN981_c0_g3;TRINITY_DN1073_c0_g1;TRINITY_DN1171_c1_g2;TRINITY_DN1153_c3_g1;TRINITY_DN1278_c0_g1;TRINITY_DN1285_c0_g2;TRINITY_DN1303_c6_g1;TRINITY_DN136…
protein glycosylation	biological_process	GO:0006486	159	TRINITY_DN180_c0_g1;TRINITY_DN133_c0_g1;TRINITY_DN158_c1_g1;TRINITY_DN137_c0_g1;TRINITY_DN223_c2_g1;TRINITY_DN328_c2_g2;TRINITY_DN483_c1_g1;TRINITY_DN494_c2_g2;TRINITY_DN580_c0_g1;TRINITY_DN667_c0_g1;TRINITY_DN707_c1_g1;TRINITY_DN717_c0_g1;TRINITY_DN852_c2_g2;TRINITY_DN852_c2_g1;TRINITY_DN962_c0_g1;TRINITY_DN965_c0_g1;TRINITY_DN983_c3_g1;TRINITY_DN1181_c0_g1;TRINITY_DN1155_c1_g2;TRINITY_DN1191_c0…
regulation of translation	biological_process	GO:0006417	158	TRINITY_DN85_c2_g1;TRINITY_DN46_c0_g3;TRINITY_DN174_c7_g1;TRINITY_DN168_c0_g1;TRINITY_DN219_c1_g2;TRINITY_DN236_c0_g1;TRINITY_DN288_c1_g1;TRINITY_DN277_c0_g2;TRINITY_DN381_c2_g1;TRINITY_DN392_c0_g1;TRINITY_DN356_c0_g1;TRINITY_DN477_c0_g3;TRINITY_DN481_c1_g2;TRINITY_DN466_c2_g1;TRINITY_DN403_c0_g1;TRINITY_DN450_c0_g2;TRINITY_DN505_c0_g1;TRINITY_DN884_c0_g1;TRINITY_DN849_c2_g1;TRINITY_DN944_c0_g1;T…
ion channel binding	molecular_function	GO:0044325	158	TRINITY_DN62_c2_g1;TRINITY_DN76_c0_g1;TRINITY_DN151_c2_g3;TRINITY_DN188_c0_g2;TRINITY_DN172_c0_g1;TRINITY_DN244_c3_g1;TRINITY_DN234_c1_g1;TRINITY_DN234_c0_g3;TRINITY_DN380_c1_g1;TRINITY_DN408_c0_g1;TRINITY_DN439_c3_g1;TRINITY_DN589_c0_g1;TRINITY_DN521_c0_g1;TRINITY_DN572_c1_g1;TRINITY_DN665_c6_g1;TRINITY_DN885_c0_g2;TRINITY_DN802_c0_g1;TRINITY_DN957_c0_g1;TRINITY_DN1084_c1_g1;TRINITY_DN1259_c0_g1…
endomembrane system	cellular_component	GO:0012505	157	TRINITY_DN12_c0_g1;TRINITY_DN54_c0_g1;TRINITY_DN176_c2_g2;TRINITY_DN230_c5_g1;TRINITY_DN367_c0_g1;TRINITY_DN374_c0_g1;TRINITY_DN389_c0_g1;TRINITY_DN315_c0_g2;TRINITY_DN451_c0_g1;TRINITY_DN436_c0_g2;TRINITY_DN716_c0_g1;TRINITY_DN723_c1_g2;TRINITY_DN847_c1_g1;TRINITY_DN809_c0_g1;TRINITY_DN886_c0_g1;TRINITY_DN984_c10_g1;TRINITY_DN913_c2_g1;TRINITY_DN1076_c1_g1;TRINITY_DN1060_c0_g1;TRINITY_DN1125_c1_…
brush border	cellular_component	GO:0005903	157	TRINITY_DN29_c3_g1;TRINITY_DN151_c6_g1;TRINITY_DN214_c0_g1;TRINITY_DN336_c0_g1;TRINITY_DN423_c1_g1;TRINITY_DN572_c4_g1;TRINITY_DN794_c0_g1;TRINITY_DN785_c1_g3;TRINITY_DN785_c1_g1;TRINITY_DN775_c0_g1;TRINITY_DN712_c9_g1;TRINITY_DN809_c0_g1;TRINITY_DN901_c8_g1;TRINITY_DN1053_c0_g1;TRINITY_DN1018_c5_g1;TRINITY_DN1382_c2_g1;TRINITY_DN1344_c0_g1;TRINITY_DN1344_c0_g2;TRINITY_DN1402_c0_g1;TRINITY_DN1653…
circadian rhythm	biological_process	GO:0007623	157	TRINITY_DN85_c2_g1;TRINITY_DN123_c0_g1;TRINITY_DN165_c1_g2;TRINITY_DN179_c0_g1;TRINITY_DN248_c0_g1;TRINITY_DN248_c0_g2;TRINITY_DN216_c1_g1;TRINITY_DN329_c0_g1;TRINITY_DN443_c0_g2;TRINITY_DN508_c0_g3;TRINITY_DN520_c1_g1;TRINITY_DN601_c0_g1;TRINITY_DN686_c0_g1;TRINITY_DN646_c0_g2;TRINITY_DN746_c0_g1;TRINITY_DN803_c2_g1;TRINITY_DN834_c0_g1;TRINITY_DN980_c0_g2;TRINITY_DN1038_c0_g1;TRINITY_DN1070_c2_g…
response to endoplasmic reticulum stress	biological_process	GO:0034976	157	TRINITY_DN93_c4_g1;TRINITY_DN40_c0_g1;TRINITY_DN196_c0_g2;TRINITY_DN121_c0_g1;TRINITY_DN139_c0_g1;TRINITY_DN265_c0_g1;TRINITY_DN212_c0_g1;TRINITY_DN387_c2_g1;TRINITY_DN364_c1_g1;TRINITY_DN407_c0_g1;TRINITY_DN455_c2_g1;TRINITY_DN611_c4_g1;TRINITY_DN751_c0_g1;TRINITY_DN784_c0_g1;TRINITY_DN784_c0_g2;TRINITY_DN884_c0_g1;TRINITY_DN1044_c0_g1;TRINITY_DN1066_c0_g1;TRINITY_DN1083_c1_g1;TRINITY_DN1093_c0_…
locomotory behavior	biological_process	GO:0007626	156	TRINITY_DN175_c0_g1;TRINITY_DN259_c0_g6;TRINITY_DN231_c0_g1;TRINITY_DN301_c0_g1;TRINITY_DN519_c0_g1;TRINITY_DN514_c0_g4;TRINITY_DN697_c0_g1;TRINITY_DN648_c3_g1;TRINITY_DN648_c3_g2;TRINITY_DN739_c0_g1;TRINITY_DN876_c3_g1;TRINITY_DN878_c0_g1;TRINITY_DN951_c0_g1;TRINITY_DN1003_c1_g1;TRINITY_DN1182_c3_g1;TRINITY_DN1378_c0_g1;TRINITY_DN1445_c0_g1;TRINITY_DN1519_c0_g1;TRINITY_DN1517_c3_g1;TRINITY_DN160…
damaged DNA binding	molecular_function	GO:0003684	156	TRINITY_DN38_c1_g1;TRINITY_DN165_c1_g3;TRINITY_DN165_c1_g2;TRINITY_DN186_c1_g1;TRINITY_DN187_c0_g1;TRINITY_DN288_c1_g1;TRINITY_DN346_c1_g1;TRINITY_DN560_c2_g1;TRINITY_DN695_c0_g1;TRINITY_DN661_c1_g1;TRINITY_DN730_c0_g1;TRINITY_DN795_c0_g1;TRINITY_DN1172_c0_g1;TRINITY_DN1136_c0_g1;TRINITY_DN1136_c0_g2;TRINITY_DN1127_c0_g1;TRINITY_DN1552_c1_g1;TRINITY_DN1756_c0_g4;TRINITY_DN1756_c0_g1;TRINITY_DN182…
protease binding	molecular_function	GO:0002020	156	TRINITY_DN13_c0_g2;TRINITY_DN11_c1_g1;TRINITY_DN28_c0_g3;TRINITY_DN229_c0_g1;TRINITY_DN376_c0_g1;TRINITY_DN471_c0_g1;TRINITY_DN421_c0_g1;TRINITY_DN455_c2_g1;TRINITY_DN486_c1_g1;TRINITY_DN562_c1_g2;TRINITY_DN545_c0_g1;TRINITY_DN604_c1_g1;TRINITY_DN794_c0_g1;TRINITY_DN885_c0_g2;TRINITY_DN1045_c0_g1;TRINITY_DN1017_c1_g2;TRINITY_DN1112_c1_g1;TRINITY_DN1155_c1_g1;TRINITY_DN1204_c1_g1;TRINITY_DN1282_c1…
lung development	biological_process	GO:0030324	156	TRINITY_DN70_c2_g1;TRINITY_DN86_c3_g4;TRINITY_DN86_c1_g1;TRINITY_DN165_c1_g2;TRINITY_DN156_c1_g2;TRINITY_DN217_c0_g3;TRINITY_DN220_c0_g1;TRINITY_DN332_c1_g1;TRINITY_DN320_c0_g1;TRINITY_DN471_c0_g1;TRINITY_DN560_c0_g1;TRINITY_DN770_c0_g1;TRINITY_DN874_c3_g1;TRINITY_DN901_c1_g1;TRINITY_DN941_c0_g1;TRINITY_DN938_c0_g1;TRINITY_DN1014_c0_g1;TRINITY_DN1028_c0_g1;TRINITY_DN1146_c0_g2;TRINITY_DN1285_c3_g…
skeletal system development	biological_process	GO:0001501	156	TRINITY_DN86_c3_g1;TRINITY_DN86_c3_g3;TRINITY_DN86_c3_g2;TRINITY_DN22_c0_g1;TRINITY_DN45_c1_g1;TRINITY_DN165_c1_g4;TRINITY_DN188_c0_g2;TRINITY_DN172_c1_g2;TRINITY_DN259_c0_g6;TRINITY_DN226_c0_g1;TRINITY_DN346_c1_g1;TRINITY_DN398_c0_g1;TRINITY_DN398_c0_g2;TRINITY_DN498_c0_g1;TRINITY_DN485_c1_g1;TRINITY_DN512_c0_g1;TRINITY_DN578_c0_g1;TRINITY_DN546_c1_g1;TRINITY_DN510_c0_g2;TRINITY_DN582_c1_g1;TRIN…
ER to Golgi vesicle-mediated transport	biological_process	GO:0006888	155	TRINITY_DN39_c1_g1;TRINITY_DN50_c1_g1;TRINITY_DN180_c0_g1;TRINITY_DN188_c0_g1;TRINITY_DN188_c0_g2;TRINITY_DN174_c0_g1;TRINITY_DN249_c0_g1;TRINITY_DN200_c1_g2;TRINITY_DN200_c1_g1;TRINITY_DN389_c0_g1;TRINITY_DN522_c0_g1;TRINITY_DN565_c0_g1;TRINITY_DN593_c0_g1;TRINITY_DN699_c0_g1;TRINITY_DN644_c0_g1;TRINITY_DN620_c0_g1;TRINITY_DN780_c0_g1;TRINITY_DN826_c0_g1;TRINITY_DN894_c0_g2;TRINITY_DN801_c0_g2;T…
cell projection	cellular_component	GO:0042995	155	TRINITY_DN49_c2_g1;TRINITY_DN125_c2_g1;TRINITY_DN372_c13_g1;TRINITY_DN428_c4_g3;TRINITY_DN582_c2_g1;TRINITY_DN515_c2_g1;TRINITY_DN603_c0_g1;TRINITY_DN705_c0_g1;TRINITY_DN742_c1_g1;TRINITY_DN787_c0_g2;TRINITY_DN787_c0_g3;TRINITY_DN811_c0_g1;TRINITY_DN1154_c0_g1;TRINITY_DN1308_c0_g2;TRINITY_DN1339_c1_g1;TRINITY_DN1316_c0_g1;TRINITY_DN1316_c2_g1;TRINITY_DN1351_c6_g1;TRINITY_DN1447_c2_g1;TRINITY_DN16…
negative regulation of osteoblast differentiation	biological_process	GO:0045668	154	TRINITY_DN86_c3_g1;TRINITY_DN86_c3_g3;TRINITY_DN86_c3_g4;TRINITY_DN8_c1_g1;TRINITY_DN114_c1_g1;TRINITY_DN323_c0_g4;TRINITY_DN323_c0_g2;TRINITY_DN323_c2_g1;TRINITY_DN332_c4_g2;TRINITY_DN551_c3_g1;TRINITY_DN551_c8_g1;TRINITY_DN899_c0_g1;TRINITY_DN1134_c1_g1;TRINITY_DN1102_c0_g2;TRINITY_DN1222_c1_g1;TRINITY_DN1232_c0_g1;TRINITY_DN1387_c0_g1;TRINITY_DN1943_c4_g2;TRINITY_DN1943_c2_g1;TRINITY_DN1943_c6…
calcium ion transmembrane transport	biological_process	GO:0070588	154	TRINITY_DN78_c12_g1;TRINITY_DN62_c2_g1;TRINITY_DN76_c0_g1;TRINITY_DN258_c7_g1;TRINITY_DN665_c6_g1;TRINITY_DN708_c1_g1;TRINITY_DN751_c0_g1;TRINITY_DN712_c6_g1;TRINITY_DN802_c0_g1;TRINITY_DN1083_c1_g1;TRINITY_DN1158_c1_g1;TRINITY_DN1345_c1_g4;TRINITY_DN1458_c0_g1;TRINITY_DN1528_c1_g1;TRINITY_DN1628_c1_g1;TRINITY_DN1628_c2_g1;TRINITY_DN1685_c0_g1;TRINITY_DN1846_c0_g1;TRINITY_DN1938_c0_g1;TRINITY_DN1…
drug binding	molecular_function	GO:0008144	154	TRINITY_DN88_c0_g1;TRINITY_DN69_c2_g2;TRINITY_DN125_c1_g1;TRINITY_DN110_c2_g2;TRINITY_DN287_c4_g1;TRINITY_DN271_c0_g1;TRINITY_DN263_c2_g1;TRINITY_DN378_c0_g1;TRINITY_DN438_c3_g1;TRINITY_DN451_c2_g3;TRINITY_DN601_c4_g1;TRINITY_DN641_c3_g1;TRINITY_DN878_c0_g1;TRINITY_DN909_c0_g4;TRINITY_DN1092_c0_g4;TRINITY_DN1092_c0_g1;TRINITY_DN1185_c0_g1;TRINITY_DN1311_c0_g1;TRINITY_DN1382_c1_g1;TRINITY_DN1361_c…
synaptic vesicle	cellular_component	GO:0008021	154	TRINITY_DN48_c1_g1;TRINITY_DN122_c1_g1;TRINITY_DN114_c0_g1;TRINITY_DN124_c0_g1;TRINITY_DN249_c0_g1;TRINITY_DN322_c0_g1;TRINITY_DN362_c0_g1;TRINITY_DN447_c0_g1;TRINITY_DN708_c0_g1;TRINITY_DN783_c2_g1;TRINITY_DN716_c0_g1;TRINITY_DN725_c1_g1;TRINITY_DN885_c0_g3;TRINITY_DN849_c3_g1;TRINITY_DN918_c1_g1;TRINITY_DN913_c2_g1;TRINITY_DN1066_c0_g1;TRINITY_DN1153_c1_g1;TRINITY_DN1167_c1_g1;TRINITY_DN1250_c1…
chromosome segregation	biological_process	GO:0007059	154	TRINITY_DN183_c0_g2;TRINITY_DN170_c0_g1;TRINITY_DN352_c3_g1;TRINITY_DN387_c2_g1;TRINITY_DN311_c0_g1;TRINITY_DN482_c1_g4;TRINITY_DN414_c0_g1;TRINITY_DN585_c0_g1;TRINITY_DN610_c0_g1;TRINITY_DN779_c4_g1;TRINITY_DN750_c0_g1;TRINITY_DN977_c0_g1;TRINITY_DN999_c0_g2;TRINITY_DN942_c1_g1;TRINITY_DN967_c0_g1;TRINITY_DN1068_c1_g2;TRINITY_DN1177_c0_g2;TRINITY_DN1198_c0_g1;TRINITY_DN1154_c4_g1;TRINITY_DN1154_…
protein complex assembly	biological_process	GO:0006461	153	TRINITY_DN13_c2_g2;TRINITY_DN13_c2_g1;TRINITY_DN180_c1_g1;TRINITY_DN151_c2_g3;TRINITY_DN187_c0_g1;TRINITY_DN214_c0_g1;TRINITY_DN261_c1_g1;TRINITY_DN264_c0_g1;TRINITY_DN220_c2_g1;TRINITY_DN312_c1_g2;TRINITY_DN312_c1_g1;TRINITY_DN370_c0_g1;TRINITY_DN372_c13_g1;TRINITY_DN533_c1_g1;TRINITY_DN590_c0_g1;TRINITY_DN558_c5_g1;TRINITY_DN508_c2_g1;TRINITY_DN691_c0_g1;TRINITY_DN999_c0_g1;TRINITY_DN999_c0_g2;…
mRNA transport	biological_process	GO:0051028	153	TRINITY_DN134_c1_g1;TRINITY_DN111_c0_g1;TRINITY_DN209_c0_g2;TRINITY_DN219_c1_g2;TRINITY_DN381_c2_g1;TRINITY_DN320_c0_g1;TRINITY_DN450_c0_g1;TRINITY_DN450_c0_g2;TRINITY_DN450_c0_g3;TRINITY_DN530_c1_g1;TRINITY_DN508_c7_g1;TRINITY_DN674_c1_g1;TRINITY_DN742_c1_g2;TRINITY_DN742_c1_g1;TRINITY_DN728_c0_g1;TRINITY_DN875_c0_g1;TRINITY_DN875_c0_g2;TRINITY_DN942_c2_g1;TRINITY_DN1102_c0_g1;TRINITY_DN1288_c3_…
canonical Wnt signaling pathway	biological_process	GO:0060070	153	TRINITY_DN62_c0_g1;TRINITY_DN128_c4_g1;TRINITY_DN240_c0_g1;TRINITY_DN217_c0_g3;TRINITY_DN387_c2_g1;TRINITY_DN319_c0_g1;TRINITY_DN373_c0_g1;TRINITY_DN478_c1_g1;TRINITY_DN452_c0_g1;TRINITY_DN494_c2_g2;TRINITY_DN562_c1_g2;TRINITY_DN510_c0_g2;TRINITY_DN520_c3_g1;TRINITY_DN745_c0_g1;TRINITY_DN895_c0_g1;TRINITY_DN939_c0_g2;TRINITY_DN906_c1_g2;TRINITY_DN906_c1_g1;TRINITY_DN1031_c0_g1;TRINITY_DN1031_c0_g…
periplasmic space	cellular_component	GO:0042597	153	TRINITY_DN8369_c0_g1;TRINITY_DN9807_c0_g2;TRINITY_DN11947_c0_g5;TRINITY_DN12175_c0_g6;TRINITY_DN12175_c0_g2;TRINITY_DN12927_c0_g2;TRINITY_DN13595_c0_g5;TRINITY_DN13595_c0_g1;TRINITY_DN13595_c0_g3;TRINITY_DN15214_c0_g2;TRINITY_DN15645_c2_g3;TRINITY_DN15645_c1_g7;TRINITY_DN16760_c0_g14;TRINITY_DN17003_c0_g2;TRINITY_DN17106_c0_g1;TRINITY_DN17506_c0_g1;TRINITY_DN17647_c0_g3;TRINITY_DN18280_c0_g1;TRIN…
ATPase activity, coupled to transmembrane movement of substances	molecular_function	GO:0042626	153	TRINITY_DN167_c0_g1;TRINITY_DN241_c2_g1;TRINITY_DN322_c1_g1;TRINITY_DN392_c1_g1;TRINITY_DN372_c1_g1;TRINITY_DN372_c2_g1;TRINITY_DN420_c2_g1;TRINITY_DN674_c2_g1;TRINITY_DN691_c0_g1;TRINITY_DN784_c0_g1;TRINITY_DN872_c0_g1;TRINITY_DN1115_c0_g2;TRINITY_DN1345_c1_g2;TRINITY_DN1487_c1_g1;TRINITY_DN1530_c0_g1;TRINITY_DN1752_c1_g1;TRINITY_DN1884_c0_g1;TRINITY_DN1928_c5_g1;TRINITY_DN2221_c1_g2;TRINITY_DN2…
double-stranded DNA binding	molecular_function	GO:0003690	153	TRINITY_DN21_c1_g1;TRINITY_DN45_c0_g1;TRINITY_DN125_c1_g1;TRINITY_DN165_c0_g1;TRINITY_DN255_c8_g1;TRINITY_DN372_c0_g1;TRINITY_DN439_c1_g2;TRINITY_DN439_c1_g1;TRINITY_DN638_c1_g1;TRINITY_DN802_c0_g1;TRINITY_DN990_c1_g1;TRINITY_DN938_c0_g1;TRINITY_DN953_c0_g1;TRINITY_DN964_c1_g1;TRINITY_DN1153_c2_g1;TRINITY_DN1264_c2_g1;TRINITY_DN1663_c0_g1;TRINITY_DN1781_c1_g1;TRINITY_DN1823_c0_g1;TRINITY_DN1888_c…
perikaryon	cellular_component	GO:0043204	153	TRINITY_DN10_c1_g1;TRINITY_DN182_c0_g1;TRINITY_DN204_c1_g1;TRINITY_DN234_c1_g1;TRINITY_DN253_c0_g1;TRINITY_DN229_c0_g1;TRINITY_DN277_c0_g2;TRINITY_DN378_c0_g1;TRINITY_DN477_c0_g3;TRINITY_DN455_c0_g1;TRINITY_DN512_c0_g4;TRINITY_DN501_c3_g1;TRINITY_DN747_c0_g1;TRINITY_DN709_c0_g1;TRINITY_DN769_c0_g1;TRINITY_DN872_c3_g1;TRINITY_DN942_c1_g1;TRINITY_DN1014_c0_g1;TRINITY_DN1002_c1_g1;TRINITY_DN1182_c0_…
male gonad development	biological_process	GO:0008584	153	TRINITY_DN55_c0_g1;TRINITY_DN13_c0_g1;TRINITY_DN125_c1_g1;TRINITY_DN164_c1_g1;TRINITY_DN189_c0_g1;TRINITY_DN110_c4_g1;TRINITY_DN217_c0_g3;TRINITY_DN319_c0_g2;TRINITY_DN320_c0_g1;TRINITY_DN455_c2_g1;TRINITY_DN638_c1_g1;TRINITY_DN705_c0_g1;TRINITY_DN730_c0_g1;TRINITY_DN783_c2_g1;TRINITY_DN943_c0_g1;TRINITY_DN908_c2_g1;TRINITY_DN1065_c1_g1;TRINITY_DN1264_c2_g1;TRINITY_DN1285_c3_g1;TRINITY_DN1345_c2_…
PDZ domain binding	molecular_function	GO:0030165	152	TRINITY_DN176_c3_g1;TRINITY_DN240_c0_g1;TRINITY_DN205_c2_g1;TRINITY_DN293_c0_g1;TRINITY_DN378_c0_g1;TRINITY_DN354_c1_g1;TRINITY_DN315_c0_g2;TRINITY_DN460_c0_g1;TRINITY_DN420_c2_g1;TRINITY_DN492_c0_g2;TRINITY_DN566_c0_g1;TRINITY_DN576_c0_g3;TRINITY_DN663_c12_g1;TRINITY_DN672_c0_g1;TRINITY_DN971_c1_g2;TRINITY_DN971_c1_g1;TRINITY_DN1216_c0_g2;TRINITY_DN1382_c2_g1;TRINITY_DN1390_c0_g1;TRINITY_DN1777_…
protein N-linked glycosylation via asparagine	biological_process	GO:0018279	152	TRINITY_DN39_c1_g1;TRINITY_DN50_c1_g1;TRINITY_DN247_c0_g1;TRINITY_DN223_c2_g1;TRINITY_DN267_c2_g4;TRINITY_DN395_c3_g1;TRINITY_DN378_c0_g1;TRINITY_DN780_c0_g1;TRINITY_DN724_c3_g1;TRINITY_DN826_c0_g1;TRINITY_DN894_c0_g2;TRINITY_DN871_c0_g1;TRINITY_DN848_c0_g2;TRINITY_DN963_c3_g1;TRINITY_DN1181_c0_g1;TRINITY_DN1122_c0_g5;TRINITY_DN1128_c0_g2;TRINITY_DN1264_c4_g1;TRINITY_DN1228_c9_g1;TRINITY_DN1487_c…
double-stranded RNA binding	molecular_function	GO:0003725	152	TRINITY_DN45_c0_g1;TRINITY_DN49_c2_g1;TRINITY_DN354_c6_g1;TRINITY_DN327_c0_g1;TRINITY_DN426_c0_g1;TRINITY_DN426_c0_g2;TRINITY_DN426_c0_g3;TRINITY_DN575_c0_g1;TRINITY_DN575_c0_g2;TRINITY_DN579_c0_g1;TRINITY_DN579_c0_g3;TRINITY_DN677_c0_g1;TRINITY_DN667_c0_g1;TRINITY_DN683_c0_g1;TRINITY_DN653_c1_g1;TRINITY_DN793_c0_g1;TRINITY_DN789_c0_g1;TRINITY_DN869_c0_g1;TRINITY_DN904_c1_g1;TRINITY_DN901_c8_g1;T…
central nervous system development	biological_process	GO:0007417	152	TRINITY_DN28_c0_g3;TRINITY_DN248_c0_g1;TRINITY_DN248_c0_g2;TRINITY_DN259_c0_g6;TRINITY_DN301_c0_g1;TRINITY_DN302_c0_g1;TRINITY_DN491_c2_g1;TRINITY_DN954_c0_g1;TRINITY_DN1287_c2_g1;TRINITY_DN1363_c0_g1;TRINITY_DN1387_c0_g1;TRINITY_DN1558_c0_g1;TRINITY_DN1558_c0_g2;TRINITY_DN1566_c0_g1;TRINITY_DN1608_c0_g2;TRINITY_DN1691_c1_g1;TRINITY_DN1777_c3_g5;TRINITY_DN1765_c0_g1;TRINITY_DN1828_c4_g2;TRINITY_D…
core promoter sequence-specific DNA binding	molecular_function	GO:0001046	150	TRINITY_DN13_c2_g2;TRINITY_DN13_c2_g1;TRINITY_DN110_c4_g1;TRINITY_DN204_c0_g1;TRINITY_DN323_c0_g4;TRINITY_DN323_c0_g2;TRINITY_DN323_c2_g1;TRINITY_DN443_c0_g2;TRINITY_DN551_c3_g1;TRINITY_DN551_c8_g1;TRINITY_DN510_c0_g2;TRINITY_DN531_c0_g1;TRINITY_DN720_c0_g1;TRINITY_DN803_c2_g1;TRINITY_DN942_c1_g1;TRINITY_DN1134_c1_g1;TRINITY_DN1200_c2_g1;TRINITY_DN1323_c0_g2;TRINITY_DN1302_c3_g1;TRINITY_DN1473_c1…
phospholipid metabolic process	biological_process	GO:0006644	149	TRINITY_DN196_c0_g2;TRINITY_DN152_c0_g2;TRINITY_DN197_c1_g1;TRINITY_DN285_c0_g1;TRINITY_DN288_c6_g1;TRINITY_DN341_c0_g1;TRINITY_DN493_c0_g1;TRINITY_DN438_c3_g1;TRINITY_DN414_c0_g1;TRINITY_DN414_c0_g3;TRINITY_DN677_c1_g1;TRINITY_DN747_c0_g1;TRINITY_DN733_c0_g1;TRINITY_DN821_c1_g1;TRINITY_DN885_c3_g2;TRINITY_DN849_c3_g1;TRINITY_DN1022_c2_g1;TRINITY_DN1267_c1_g3;TRINITY_DN1401_c0_g1;TRINITY_DN1641_c…
response to antibiotic	biological_process	GO:0046677	149	TRINITY_DN4_c0_g1;TRINITY_DN74_c0_g3;TRINITY_DN11_c2_g1;TRINITY_DN264_c0_g1;TRINITY_DN387_c2_g1;TRINITY_DN1155_c1_g1;TRINITY_DN1182_c0_g1;TRINITY_DN1797_c0_g1;TRINITY_DN2065_c1_g1;TRINITY_DN2147_c0_g1;TRINITY_DN2239_c0_g1;TRINITY_DN2239_c0_g3;TRINITY_DN2261_c0_g1;TRINITY_DN2279_c0_g1;TRINITY_DN3124_c1_g1;TRINITY_DN3154_c1_g1;TRINITY_DN3577_c0_g1;TRINITY_DN3576_c2_g1;TRINITY_DN3605_c0_g1;TRINITY_D…
coated pit	cellular_component	GO:0005905	148	TRINITY_DN17_c0_g1;TRINITY_DN98_c1_g1;TRINITY_DN192_c2_g1;TRINITY_DN188_c1_g1;TRINITY_DN312_c1_g2;TRINITY_DN312_c1_g1;TRINITY_DN408_c0_g1;TRINITY_DN447_c0_g2;TRINITY_DN514_c0_g4;TRINITY_DN569_c7_g1;TRINITY_DN746_c2_g1;TRINITY_DN919_c0_g1;TRINITY_DN1055_c1_g1;TRINITY_DN1172_c0_g1;TRINITY_DN1109_c1_g1;TRINITY_DN1311_c1_g1;TRINITY_DN1358_c0_g1;TRINITY_DN1362_c0_g1;TRINITY_DN1582_c0_g1;TRINITY_DN1593…
sodium ion transport	biological_process	GO:0006814	147	TRINITY_DN63_c0_g1;TRINITY_DN136_c1_g1;TRINITY_DN157_c0_g1;TRINITY_DN384_c0_g1;TRINITY_DN420_c2_g1;TRINITY_DN629_c1_g1;TRINITY_DN732_c0_g1;TRINITY_DN914_c1_g1;TRINITY_DN1084_c1_g1;TRINITY_DN1002_c0_g3;TRINITY_DN1231_c0_g2;TRINITY_DN1382_c2_g1;TRINITY_DN1384_c0_g1;TRINITY_DN1554_c2_g1;TRINITY_DN1517_c3_g1;TRINITY_DN1819_c0_g2;TRINITY_DN1819_c0_g1;TRINITY_DN1852_c2_g1;TRINITY_DN2018_c6_g2;TRINITY_D…
complement activation	biological_process	GO:0006956	146	TRINITY_DN205_c1_g1;TRINITY_DN986_c0_g1;TRINITY_DN986_c0_g3;TRINITY_DN979_c0_g1;TRINITY_DN1299_c0_g4;TRINITY_DN1299_c2_g1;TRINITY_DN1299_c0_g1;TRINITY_DN1299_c0_g3;TRINITY_DN1391_c1_g1;TRINITY_DN1313_c2_g2;TRINITY_DN1313_c1_g1;TRINITY_DN1313_c0_g1;TRINITY_DN1488_c2_g1;TRINITY_DN2551_c0_g1;TRINITY_DN3117_c3_g1;TRINITY_DN3117_c4_g1;TRINITY_DN3117_c9_g1;TRINITY_DN3117_c3_g2;TRINITY_DN3117_c0_g1;TRIN…
Golgi cisterna membrane	cellular_component	GO:0032580	146	TRINITY_DN72_c2_g1;TRINITY_DN180_c0_g1;TRINITY_DN130_c3_g1;TRINITY_DN172_c1_g1;TRINITY_DN258_c0_g1;TRINITY_DN252_c0_g2;TRINITY_DN395_c3_g1;TRINITY_DN322_c2_g1;TRINITY_DN320_c1_g1;TRINITY_DN420_c1_g1;TRINITY_DN530_c0_g1;TRINITY_DN580_c0_g1;TRINITY_DN592_c3_g1;TRINITY_DN904_c0_g1;TRINITY_DN925_c0_g1;TRINITY_DN962_c0_g1;TRINITY_DN965_c0_g1;TRINITY_DN1191_c0_g1;TRINITY_DN1205_c0_g1;TRINITY_DN1492_c0_…
peptidyl-tyrosine dephosphorylation	biological_process	GO:0035335	146	TRINITY_DN10_c0_g1;TRINITY_DN10_c0_g2;TRINITY_DN237_c3_g1;TRINITY_DN203_c0_g1;TRINITY_DN351_c1_g1;TRINITY_DN348_c2_g1;TRINITY_DN475_c10_g1;TRINITY_DN524_c1_g1;TRINITY_DN1027_c0_g1;TRINITY_DN1197_c0_g1;TRINITY_DN1254_c0_g1;TRINITY_DN1474_c6_g1;TRINITY_DN1462_c0_g1;TRINITY_DN1419_c0_g1;TRINITY_DN1502_c0_g1;TRINITY_DN1599_c0_g1;TRINITY_DN1632_c0_g1;TRINITY_DN1616_c3_g1;TRINITY_DN1777_c3_g5;TRINITY_D…
protein N-terminus binding	molecular_function	GO:0047485	145	TRINITY_DN111_c2_g1;TRINITY_DN159_c0_g1;TRINITY_DN296_c0_g1;TRINITY_DN264_c2_g2;TRINITY_DN317_c0_g1;TRINITY_DN481_c1_g4;TRINITY_DN402_c1_g1;TRINITY_DN525_c0_g1;TRINITY_DN503_c1_g2;TRINITY_DN665_c1_g1;TRINITY_DN774_c0_g1;TRINITY_DN774_c0_g2;TRINITY_DN1144_c0_g1;TRINITY_DN1216_c0_g1;TRINITY_DN1271_c0_g1;TRINITY_DN1499_c0_g1;TRINITY_DN1575_c1_g1;TRINITY_DN1690_c0_g1;TRINITY_DN1683_c0_g1;TRINITY_DN16…
positive regulation of MAPK cascade	biological_process	GO:0043410	145	TRINITY_DN86_c3_g1;TRINITY_DN86_c3_g3;TRINITY_DN86_c3_g2;TRINITY_DN86_c3_g4;TRINITY_DN13_c0_g1;TRINITY_DN28_c0_g3;TRINITY_DN26_c0_g2;TRINITY_DN164_c1_g1;TRINITY_DN203_c0_g3;TRINITY_DN229_c0_g1;TRINITY_DN352_c4_g1;TRINITY_DN319_c1_g1;TRINITY_DN546_c0_g1;TRINITY_DN584_c0_g1;TRINITY_DN566_c0_g1;TRINITY_DN545_c0_g1;TRINITY_DN612_c0_g1;TRINITY_DN756_c0_g2;TRINITY_DN932_c1_g1;TRINITY_DN1076_c1_g1;TRINI…
protein sumoylation	biological_process	GO:0016925	144	TRINITY_DN85_c5_g1;TRINITY_DN45_c0_g1;TRINITY_DN31_c0_g1;TRINITY_DN115_c1_g3;TRINITY_DN134_c1_g1;TRINITY_DN203_c1_g1;TRINITY_DN352_c3_g1;TRINITY_DN330_c0_g1;TRINITY_DN363_c1_g1;TRINITY_DN494_c0_g2;TRINITY_DN482_c1_g2;TRINITY_DN434_c0_g2;TRINITY_DN459_c2_g1;TRINITY_DN428_c9_g1;TRINITY_DN623_c3_g2;TRINITY_DN899_c0_g1;TRINITY_DN875_c0_g2;TRINITY_DN1199_c0_g1;TRINITY_DN1113_c1_g1;TRINITY_DN1217_c1_g1…
cellular response to heat	biological_process	GO:0034605	144	TRINITY_DN11_c0_g1;TRINITY_DN192_c0_g4;TRINITY_DN192_c0_g5;TRINITY_DN134_c1_g1;TRINITY_DN165_c1_g2;TRINITY_DN179_c0_g1;TRINITY_DN330_c0_g1;TRINITY_DN307_c2_g1;TRINITY_DN358_c0_g1;TRINITY_DN482_c1_g2;TRINITY_DN543_c0_g2;TRINITY_DN572_c1_g1;TRINITY_DN681_c0_g1;TRINITY_DN623_c3_g2;TRINITY_DN645_c0_g1;TRINITY_DN645_c0_g2;TRINITY_DN805_c0_g4;TRINITY_DN872_c3_g1;TRINITY_DN875_c0_g2;TRINITY_DN1044_c0_g1…
axoneme	cellular_component	GO:0005930	144	TRINITY_DN72_c2_g1;TRINITY_DN29_c5_g1;TRINITY_DN2_c0_g1;TRINITY_DN23_c1_g1;TRINITY_DN302_c0_g1;TRINITY_DN389_c0_g1;TRINITY_DN414_c1_g1;TRINITY_DN552_c3_g1;TRINITY_DN742_c2_g1;TRINITY_DN793_c0_g1;TRINITY_DN723_c1_g2;TRINITY_DN844_c0_g1;TRINITY_DN1065_c0_g1;TRINITY_DN1065_c0_g2;TRINITY_DN1193_c0_g1;TRINITY_DN1271_c0_g1;TRINITY_DN1320_c0_g3;TRINITY_DN1501_c0_g1;TRINITY_DN1604_c0_g1;TRINITY_DN1761_c0…
lipid transport	biological_process	GO:0006869	143	TRINITY_DN99_c2_g1;TRINITY_DN192_c2_g1;TRINITY_DN211_c0_g1;TRINITY_DN383_c2_g1;TRINITY_DN322_c1_g1;TRINITY_DN392_c1_g1;TRINITY_DN338_c2_g1;TRINITY_DN372_c1_g1;TRINITY_DN438_c3_g1;TRINITY_DN410_c0_g1;TRINITY_DN410_c0_g2;TRINITY_DN476_c1_g1;TRINITY_DN1071_c0_g1;TRINITY_DN1110_c0_g1;TRINITY_DN1429_c0_g1;TRINITY_DN1487_c1_g1;TRINITY_DN1549_c3_g2;TRINITY_DN1527_c1_g1;TRINITY_DN1639_c1_g1;TRINITY_DN175…
caveola	cellular_component	GO:0005901	143	TRINITY_DN8_c1_g1;TRINITY_DN164_c1_g1;TRINITY_DN271_c0_g1;TRINITY_DN291_c0_g1;TRINITY_DN455_c0_g1;TRINITY_DN708_c0_g1;TRINITY_DN779_c1_g1;TRINITY_DN716_c0_g1;TRINITY_DN825_c0_g2;TRINITY_DN872_c3_g1;TRINITY_DN802_c0_g1;TRINITY_DN829_c2_g2;TRINITY_DN1093_c2_g1;TRINITY_DN1267_c0_g1;TRINITY_DN1390_c2_g4;TRINITY_DN1384_c0_g1;TRINITY_DN1557_c0_g1;TRINITY_DN1506_c4_g1;TRINITY_DN1541_c3_g1;TRINITY_DN1659…
integral component of endoplasmic reticulum membrane	cellular_component	GO:0030176	142	TRINITY_DN95_c0_g1;TRINITY_DN125_c2_g1;TRINITY_DN121_c0_g1;TRINITY_DN267_c2_g4;TRINITY_DN211_c0_g1;TRINITY_DN319_c0_g1;TRINITY_DN478_c12_g1;TRINITY_DN462_c5_g1;TRINITY_DN571_c0_g1;TRINITY_DN565_c0_g1;TRINITY_DN691_c0_g1;TRINITY_DN653_c1_g2;TRINITY_DN708_c1_g1;TRINITY_DN708_c0_g1;TRINITY_DN784_c1_g1;TRINITY_DN745_c0_g1;TRINITY_DN875_c0_g1;TRINITY_DN1174_c0_g1;TRINITY_DN1267_c1_g2;TRINITY_DN1201_c0…
motor activity	molecular_function	GO:0003774	142	TRINITY_DN40_c0_g1;TRINITY_DN121_c1_g2;TRINITY_DN121_c1_g1;TRINITY_DN281_c1_g1;TRINITY_DN404_c2_g1;TRINITY_DN514_c0_g4;TRINITY_DN697_c0_g1;TRINITY_DN648_c3_g1;TRINITY_DN648_c3_g2;TRINITY_DN796_c0_g2;TRINITY_DN1018_c5_g1;TRINITY_DN1184_c0_g1;TRINITY_DN1273_c2_g1;TRINITY_DN1740_c1_g1;TRINITY_DN1705_c0_g4;TRINITY_DN1705_c0_g1;TRINITY_DN1938_c0_g1;TRINITY_DN2089_c0_g4;TRINITY_DN2089_c0_g1;TRINITY_DN2…
translation initiation factor activity	molecular_function	GO:0003743	142	TRINITY_DN82_c0_g2;TRINITY_DN93_c1_g1;TRINITY_DN31_c1_g1;TRINITY_DN186_c1_g1;TRINITY_DN251_c1_g3;TRINITY_DN505_c0_g1;TRINITY_DN569_c0_g1;TRINITY_DN628_c0_g1;TRINITY_DN784_c0_g1;TRINITY_DN784_c0_g2;TRINITY_DN722_c0_g1;TRINITY_DN989_c0_g1;TRINITY_DN928_c0_g1;TRINITY_DN928_c0_g2;TRINITY_DN1015_c1_g1;TRINITY_DN1253_c1_g1;TRINITY_DN1328_c4_g2;TRINITY_DN1470_c0_g2;TRINITY_DN1659_c0_g1;TRINITY_DN1718_c1…
filopodium	cellular_component	GO:0030175	142	TRINITY_DN205_c2_g1;TRINITY_DN293_c0_g1;TRINITY_DN220_c16_g1;TRINITY_DN315_c0_g2;TRINITY_DN451_c2_g3;TRINITY_DN512_c0_g4;TRINITY_DN580_c0_g1;TRINITY_DN571_c0_g1;TRINITY_DN545_c0_g1;TRINITY_DN576_c0_g2;TRINITY_DN760_c4_g1;TRINITY_DN769_c0_g1;TRINITY_DN849_c2_g1;TRINITY_DN961_c1_g1;TRINITY_DN1289_c0_g1;TRINITY_DN1259_c0_g1;TRINITY_DN1283_c3_g2;TRINITY_DN1312_c0_g2;TRINITY_DN1401_c0_g1;TRINITY_DN184…
ribosome	cellular_component	GO:0005840	142	TRINITY_DN46_c0_g1;TRINITY_DN46_c0_g2;TRINITY_DN28_c2_g1;TRINITY_DN143_c0_g1;TRINITY_DN158_c0_g1;TRINITY_DN249_c0_g1;TRINITY_DN267_c1_g1;TRINITY_DN352_c0_g1;TRINITY_DN443_c0_g1;TRINITY_DN432_c0_g1;TRINITY_DN411_c2_g1;TRINITY_DN784_c0_g1;TRINITY_DN784_c0_g2;TRINITY_DN793_c0_g1;TRINITY_DN883_c0_g1;TRINITY_DN980_c0_g1;TRINITY_DN1048_c0_g1;TRINITY_DN1181_c1_g1;TRINITY_DN1162_c0_g1;TRINITY_DN1526_c0_g…
cysteine-type endopeptidase activity	molecular_function	GO:0004197	141	TRINITY_DN162_c0_g1;TRINITY_DN227_c0_g1;TRINITY_DN291_c0_g1;TRINITY_DN482_c1_g4;TRINITY_DN422_c0_g1;TRINITY_DN422_c0_g2;TRINITY_DN422_c0_g3;TRINITY_DN693_c0_g1;TRINITY_DN714_c1_g1;TRINITY_DN784_c1_g1;TRINITY_DN764_c3_g1;TRINITY_DN801_c0_g1;TRINITY_DN1068_c1_g2;TRINITY_DN1140_c5_g1;TRINITY_DN1155_c1_g3;TRINITY_DN1155_c1_g1;TRINITY_DN1119_c0_g1;TRINITY_DN1820_c1_g1;TRINITY_DN1895_c1_g1;TRINITY_DN19…
smoothened signaling pathway	biological_process	GO:0007224	141	TRINITY_DN8_c1_g1;TRINITY_DN146_c1_g1;TRINITY_DN263_c2_g1;TRINITY_DN354_c5_g1;TRINITY_DN389_c0_g1;TRINITY_DN512_c0_g2;TRINITY_DN582_c1_g1;TRINITY_DN601_c2_g1;TRINITY_DN744_c0_g1;TRINITY_DN844_c0_g1;TRINITY_DN966_c0_g1;TRINITY_DN1145_c0_g1;TRINITY_DN1828_c4_g2;TRINITY_DN2006_c0_g1;TRINITY_DN2006_c0_g2;TRINITY_DN2089_c1_g3;TRINITY_DN2089_c1_g1;TRINITY_DN2397_c1_g1;TRINITY_DN2327_c1_g1;TRINITY_DN286…
regulation of protein localization	biological_process	GO:0032880	141	TRINITY_DN8_c1_g1;TRINITY_DN76_c0_g1;TRINITY_DN217_c0_g3;TRINITY_DN277_c0_g2;TRINITY_DN283_c0_g1;TRINITY_DN312_c1_g2;TRINITY_DN312_c1_g1;TRINITY_DN381_c3_g1;TRINITY_DN477_c0_g3;TRINITY_DN805_c0_g4;TRINITY_DN944_c0_g1;TRINITY_DN964_c0_g1;TRINITY_DN1055_c1_g1;TRINITY_DN1073_c0_g1;TRINITY_DN1283_c2_g1;TRINITY_DN1240_c5_g1;TRINITY_DN1399_c0_g1;TRINITY_DN1354_c0_g1;TRINITY_DN1403_c0_g1;TRINITY_DN1670_…
cholesterol metabolic process	biological_process	GO:0008203	140	TRINITY_DN13_c0_g1;TRINITY_DN192_c2_g1;TRINITY_DN132_c0_g2;TRINITY_DN385_c0_g1;TRINITY_DN338_c2_g1;TRINITY_DN372_c2_g1;TRINITY_DN867_c0_g1;TRINITY_DN1071_c0_g1;TRINITY_DN1110_c0_g1;TRINITY_DN1311_c1_g1;TRINITY_DN1345_c2_g1;TRINITY_DN1482_c2_g1;TRINITY_DN1568_c2_g2;TRINITY_DN1635_c0_g1;TRINITY_DN1639_c1_g1;TRINITY_DN1653_c0_g1;TRINITY_DN1653_c0_g2;TRINITY_DN1808_c2_g1;TRINITY_DN1928_c2_g1;TRINITY_…
lipid particle	cellular_component	GO:0005811	140	TRINITY_DN78_c12_g1;TRINITY_DN49_c1_g1;TRINITY_DN270_c0_g2;TRINITY_DN776_c0_g1;TRINITY_DN933_c0_g1;TRINITY_DN933_c0_g2;TRINITY_DN1035_c0_g1;TRINITY_DN1051_c2_g2;TRINITY_DN1025_c0_g1;TRINITY_DN1117_c6_g1;TRINITY_DN1139_c0_g1;TRINITY_DN1264_c3_g1;TRINITY_DN1390_c2_g3;TRINITY_DN1375_c1_g1;TRINITY_DN1459_c1_g1;TRINITY_DN1459_c0_g2;TRINITY_DN1539_c3_g1;TRINITY_DN1533_c0_g1;TRINITY_DN1528_c1_g1;TRINITY…
positive regulation of protein targeting to mitochondrion	biological_process	GO:1903955	140	TRINITY_DN28_c0_g2;TRINITY_DN115_c1_g3;TRINITY_DN328_c2_g2;TRINITY_DN408_c0_g1;TRINITY_DN540_c0_g3;TRINITY_DN545_c0_g1;TRINITY_DN548_c5_g2;TRINITY_DN603_c0_g1;TRINITY_DN790_c0_g1;TRINITY_DN746_c1_g2;TRINITY_DN714_c1_g1;TRINITY_DN827_c0_g1;TRINITY_DN876_c3_g1;TRINITY_DN893_c1_g1;TRINITY_DN837_c3_g2;TRINITY_DN901_c3_g1;TRINITY_DN934_c0_g1;TRINITY_DN993_c2_g1;TRINITY_DN1012_c0_g1;TRINITY_DN1171_c3_g…
endoplasmic reticulum-Golgi intermediate compartment	cellular_component	GO:0005793	140	TRINITY_DN172_c1_g1;TRINITY_DN200_c1_g2;TRINITY_DN287_c1_g1;TRINITY_DN226_c0_g1;TRINITY_DN322_c2_g1;TRINITY_DN320_c1_g1;TRINITY_DN350_c0_g1;TRINITY_DN447_c0_g2;TRINITY_DN530_c0_g1;TRINITY_DN593_c0_g1;TRINITY_DN644_c0_g1;TRINITY_DN747_c0_g1;TRINITY_DN724_c3_g1;TRINITY_DN843_c1_g1;TRINITY_DN854_c0_g2;TRINITY_DN801_c0_g2;TRINITY_DN963_c3_g1;TRINITY_DN909_c2_g1;TRINITY_DN1058_c6_g1;TRINITY_DN1083_c1_…
determination of left/right symmetry	biological_process	GO:0007368	139	TRINITY_DN21_c0_g3;TRINITY_DN62_c2_g1;TRINITY_DN153_c1_g1;TRINITY_DN217_c0_g3;TRINITY_DN389_c0_g1;TRINITY_DN488_c0_g1;TRINITY_DN498_c1_g1;TRINITY_DN577_c0_g1;TRINITY_DN793_c0_g1;TRINITY_DN941_c0_g1;TRINITY_DN1193_c0_g1;TRINITY_DN1181_c0_g1;TRINITY_DN1334_c0_g1;TRINITY_DN1378_c0_g1;TRINITY_DN1588_c0_g1;TRINITY_DN1604_c0_g1;TRINITY_DN1705_c0_g2;TRINITY_DN1855_c0_g1;TRINITY_DN1855_c0_g2;TRINITY_DN18…
glycolytic process	biological_process	GO:0006096	139	TRINITY_DN20_c0_g1;TRINITY_DN20_c0_g2;TRINITY_DN20_c0_g3;TRINITY_DN236_c0_g1;TRINITY_DN376_c0_g1;TRINITY_DN465_c3_g1;TRINITY_DN866_c0_g1;TRINITY_DN1626_c0_g1;TRINITY_DN1681_c1_g1;TRINITY_DN1613_c1_g1;TRINITY_DN1666_c0_g1;TRINITY_DN1768_c4_g1;TRINITY_DN2163_c0_g1;TRINITY_DN2225_c0_g2;TRINITY_DN2265_c3_g1;TRINITY_DN2495_c1_g2;TRINITY_DN2495_c1_g1;TRINITY_DN2439_c1_g1;TRINITY_DN2526_c1_g1;TRINITY_DN…
G2/M transition of mitotic cell cycle	biological_process	GO:0000086	138	TRINITY_DN3_c0_g1;TRINITY_DN40_c0_g1;TRINITY_DN112_c1_g1;TRINITY_DN165_c1_g2;TRINITY_DN188_c0_g2;TRINITY_DN187_c0_g1;TRINITY_DN191_c2_g1;TRINITY_DN379_c1_g1;TRINITY_DN543_c0_g2;TRINITY_DN892_c0_g1;TRINITY_DN1052_c2_g1;TRINITY_DN1083_c0_g1;TRINITY_DN1263_c1_g2;TRINITY_DN1349_c0_g2;TRINITY_DN1419_c0_g1;TRINITY_DN1452_c0_g1;TRINITY_DN1420_c2_g1;TRINITY_DN1569_c0_g1;TRINITY_DN1552_c8_g1;TRINITY_DN160…
peptide binding	molecular_function	GO:0042277	138	TRINITY_DN68_c0_g1;TRINITY_DN11_c1_g1;TRINITY_DN180_c1_g1;TRINITY_DN143_c1_g2;TRINITY_DN195_c0_g1;TRINITY_DN169_c0_g1;TRINITY_DN110_c2_g2;TRINITY_DN171_c0_g1;TRINITY_DN291_c0_g1;TRINITY_DN277_c0_g1;TRINITY_DN469_c0_g1;TRINITY_DN530_c1_g2;TRINITY_DN545_c0_g1;TRINITY_DN552_c0_g1;TRINITY_DN1297_c0_g1;TRINITY_DN1221_c6_g1;TRINITY_DN1457_c1_g1;TRINITY_DN1516_c0_g1;TRINITY_DN1698_c0_g1;TRINITY_DN1851_c…
cilium morphogenesis	biological_process	GO:0060271	138	TRINITY_DN21_c0_g3;TRINITY_DN27_c0_g1;TRINITY_DN2_c0_g1;TRINITY_DN188_c0_g2;TRINITY_DN136_c5_g1;TRINITY_DN389_c0_g1;TRINITY_DN447_c0_g2;TRINITY_DN577_c0_g1;TRINITY_DN649_c6_g1;TRINITY_DN844_c0_g1;TRINITY_DN941_c0_g1;TRINITY_DN1145_c0_g1;TRINITY_DN1334_c0_g1;TRINITY_DN1351_c6_g1;TRINITY_DN1588_c0_g1;TRINITY_DN1554_c1_g1;TRINITY_DN1604_c0_g1;TRINITY_DN1765_c0_g1;TRINITY_DN1768_c2_g1;TRINITY_DN1982_…
intermediate filament cytoskeleton	cellular_component	GO:0045111	138	TRINITY_DN51_c1_g2;TRINITY_DN119_c0_g1;TRINITY_DN200_c0_g1;TRINITY_DN312_c2_g1;TRINITY_DN320_c0_g1;TRINITY_DN420_c0_g1;TRINITY_DN503_c1_g3;TRINITY_DN503_c1_g1;TRINITY_DN561_c3_g2;TRINITY_DN629_c0_g1;TRINITY_DN712_c2_g1;TRINITY_DN877_c1_g3;TRINITY_DN801_c0_g1;TRINITY_DN1095_c0_g1;TRINITY_DN1196_c0_g1;TRINITY_DN1229_c4_g1;TRINITY_DN1392_c0_g2;TRINITY_DN1532_c0_g1;TRINITY_DN1539_c0_g2;TRINITY_DN1781…
fat cell differentiation	biological_process	GO:0045444	138	TRINITY_DN49_c2_g1;TRINITY_DN120_c1_g1;TRINITY_DN164_c1_g1;TRINITY_DN165_c1_g2;TRINITY_DN178_c1_g1;TRINITY_DN197_c1_g1;TRINITY_DN265_c0_g1;TRINITY_DN265_c0_g2;TRINITY_DN319_c0_g1;TRINITY_DN520_c3_g1;TRINITY_DN649_c1_g1;TRINITY_DN895_c0_g1;TRINITY_DN887_c0_g1;TRINITY_DN1094_c1_g1;TRINITY_DN1217_c1_g1;TRINITY_DN1385_c4_g1;TRINITY_DN1635_c0_g1;TRINITY_DN1778_c0_g1;TRINITY_DN1880_c8_g1;TRINITY_DN1865…
chemotaxis	biological_process	GO:0006935	137	TRINITY_DN125_c0_g1;TRINITY_DN125_c1_g1;TRINITY_DN176_c2_g2;TRINITY_DN121_c0_g1;TRINITY_DN203_c0_g3;TRINITY_DN365_c0_g2;TRINITY_DN427_c0_g1;TRINITY_DN651_c0_g1;TRINITY_DN742_c1_g1;TRINITY_DN861_c2_g2;TRINITY_DN861_c2_g1;TRINITY_DN986_c0_g1;TRINITY_DN986_c0_g3;TRINITY_DN949_c1_g1;TRINITY_DN1216_c0_g1;TRINITY_DN1267_c1_g3;TRINITY_DN1423_c0_g1;TRINITY_DN1443_c0_g1;TRINITY_DN1434_c0_g2;TRINITY_DN1647…
extrinsic component of cytoplasmic side of plasma membrane	cellular_component	GO:0031234	137	TRINITY_DN99_c2_g1;TRINITY_DN181_c0_g1;TRINITY_DN204_c1_g1;TRINITY_DN387_c4_g1;TRINITY_DN572_c1_g1;TRINITY_DN621_c0_g1;TRINITY_DN751_c0_g1;TRINITY_DN742_c1_g1;TRINITY_DN1312_c0_g1;TRINITY_DN1435_c0_g1;TRINITY_DN1472_c1_g1;TRINITY_DN1528_c9_g1;TRINITY_DN1704_c0_g1;TRINITY_DN2045_c4_g1;TRINITY_DN2005_c0_g1;TRINITY_DN2183_c2_g1;TRINITY_DN2143_c5_g1;TRINITY_DN2214_c0_g1;TRINITY_DN2341_c1_g1;TRINITY_D…
hippocampus development	biological_process	GO:0021766	137	TRINITY_DN307_c2_g1;TRINITY_DN482_c1_g4;TRINITY_DN402_c0_g1;TRINITY_DN783_c2_g1;TRINITY_DN769_c0_g1;TRINITY_DN825_c0_g2;TRINITY_DN1097_c0_g2;TRINITY_DN1068_c1_g2;TRINITY_DN1166_c0_g1;TRINITY_DN1146_c0_g4;TRINITY_DN1155_c1_g1;TRINITY_DN1167_c0_g1;TRINITY_DN1308_c0_g2;TRINITY_DN1499_c0_g1;TRINITY_DN1409_c1_g1;TRINITY_DN1575_c1_g1;TRINITY_DN1735_c1_g1;TRINITY_DN1828_c4_g2;TRINITY_DN1988_c0_g2;TRINIT…
negative regulation of translation	biological_process	GO:0017148	137	TRINITY_DN85_c2_g1;TRINITY_DN93_c1_g1;TRINITY_DN195_c0_g1;TRINITY_DN114_c1_g1;TRINITY_DN395_c0_g1;TRINITY_DN301_c1_g1;TRINITY_DN372_c0_g1;TRINITY_DN440_c0_g1;TRINITY_DN437_c0_g1;TRINITY_DN450_c0_g1;TRINITY_DN450_c0_g2;TRINITY_DN450_c0_g3;TRINITY_DN663_c1_g1;TRINITY_DN638_c1_g1;TRINITY_DN751_c1_g2;TRINITY_DN758_c0_g1;TRINITY_DN1088_c1_g1;TRINITY_DN1093_c0_g1;TRINITY_DN1093_c0_g2;TRINITY_DN1116_c4_…
positive regulation of proteasomal ubiquitin-dependent protein catabolic process	biological_process	GO:0032436	137	TRINITY_DN77_c0_g1;TRINITY_DN97_c4_g1;TRINITY_DN29_c5_g1;TRINITY_DN192_c1_g4;TRINITY_DN109_c1_g1;TRINITY_DN227_c0_g1;TRINITY_DN264_c0_g1;TRINITY_DN277_c0_g2;TRINITY_DN381_c3_g1;TRINITY_DN373_c0_g1;TRINITY_DN477_c0_g3;TRINITY_DN405_c1_g1;TRINITY_DN494_c2_g2;TRINITY_DN502_c0_g1;TRINITY_DN649_c12_g1;TRINITY_DN861_c0_g1;TRINITY_DN861_c0_g2;TRINITY_DN958_c0_g2;TRINITY_DN944_c0_g1;TRINITY_DN1088_c0_g1;…
lipid catabolic process	biological_process	GO:0016042	136	TRINITY_DN370_c2_g1;TRINITY_DN319_c0_g1;TRINITY_DN658_c0_g1;TRINITY_DN733_c0_g1;TRINITY_DN1293_c0_g1;TRINITY_DN1210_c0_g1;TRINITY_DN1267_c0_g1;TRINITY_DN1267_c1_g3;TRINITY_DN1267_c1_g5;TRINITY_DN1267_c1_g4;TRINITY_DN1456_c0_g1;TRINITY_DN1459_c1_g1;TRINITY_DN1459_c0_g2;TRINITY_DN1676_c0_g1;TRINITY_DN1880_c1_g1;TRINITY_DN1927_c0_g1;TRINITY_DN2283_c0_g2;TRINITY_DN2308_c0_g1;TRINITY_DN2669_c0_g1;TRIN…
apoptotic signaling pathway	biological_process	GO:0097190	136	TRINITY_DN252_c0_g2;TRINITY_DN220_c16_g1;TRINITY_DN416_c0_g1;TRINITY_DN423_c0_g1;TRINITY_DN632_c0_g1;TRINITY_DN611_c4_g1;TRINITY_DN791_c0_g1;TRINITY_DN800_c0_g1;TRINITY_DN901_c5_g1;TRINITY_DN1050_c1_g1;TRINITY_DN1171_c1_g2;TRINITY_DN1108_c0_g1;TRINITY_DN1285_c0_g2;TRINITY_DN1204_c1_g1;TRINITY_DN1312_c0_g1;TRINITY_DN1312_c0_g2;TRINITY_DN1447_c3_g1;TRINITY_DN1468_c0_g1;TRINITY_DN1603_c0_g1;TRINITY_…
core promoter binding	molecular_function	GO:0001047	136	TRINITY_DN23_c5_g1;TRINITY_DN165_c1_g2;TRINITY_DN178_c1_g1;TRINITY_DN248_c0_g1;TRINITY_DN248_c0_g2;TRINITY_DN288_c2_g1;TRINITY_DN396_c0_g1;TRINITY_DN307_c2_g1;TRINITY_DN346_c0_g2;TRINITY_DN319_c0_g2;TRINITY_DN426_c0_g1;TRINITY_DN426_c0_g2;TRINITY_DN439_c1_g2;TRINITY_DN439_c1_g1;TRINITY_DN520_c3_g1;TRINITY_DN520_c1_g1;TRINITY_DN517_c0_g1;TRINITY_DN576_c0_g1;TRINITY_DN617_c0_g1;TRINITY_DN732_c0_g1;…
endopeptidase activity	molecular_function	GO:0004175	135	TRINITY_DN291_c0_g1;TRINITY_DN252_c0_g2;TRINITY_DN306_c0_g2;TRINITY_DN491_c2_g6;TRINITY_DN494_c2_g2;TRINITY_DN514_c0_g3;TRINITY_DN522_c0_g1;TRINITY_DN677_c1_g1;TRINITY_DN784_c1_g1;TRINITY_DN850_c0_g1;TRINITY_DN850_c0_g2;TRINITY_DN849_c3_g1;TRINITY_DN913_c4_g1;TRINITY_DN1138_c2_g1;TRINITY_DN1217_c1_g1;TRINITY_DN1361_c0_g1;TRINITY_DN1304_c0_g2;TRINITY_DN1457_c1_g1;TRINITY_DN1420_c1_g2;TRINITY_DN142…
positive regulation of peptidyl-serine phosphorylation	biological_process	GO:0033138	135	TRINITY_DN10_c3_g1;TRINITY_DN0_c15_g1;TRINITY_DN217_c0_g3;TRINITY_DN354_c6_g1;TRINITY_DN508_c3_g1;TRINITY_DN603_c2_g2;TRINITY_DN603_c2_g1;TRINITY_DN619_c0_g1;TRINITY_DN827_c0_g1;TRINITY_DN987_c0_g1;TRINITY_DN944_c0_g1;TRINITY_DN944_c0_g2;TRINITY_DN906_c2_g1;TRINITY_DN1049_c0_g1;TRINITY_DN1153_c2_g2;TRINITY_DN1238_c0_g1;TRINITY_DN1546_c0_g1;TRINITY_DN1539_c0_g2;TRINITY_DN1657_c1_g1;TRINITY_DN1691_…
neuronal postsynaptic density	cellular_component	GO:0097481	135	TRINITY_DN125_c2_g1;TRINITY_DN152_c0_g2;TRINITY_DN152_c0_g3;TRINITY_DN231_c0_g1;TRINITY_DN299_c0_g1;TRINITY_DN546_c2_g1;TRINITY_DN527_c0_g1;TRINITY_DN527_c0_g2;TRINITY_DN527_c1_g1;TRINITY_DN558_c5_g1;TRINITY_DN576_c0_g2;TRINITY_DN779_c2_g1;TRINITY_DN849_c3_g1;TRINITY_DN901_c0_g2;TRINITY_DN1077_c0_g1;TRINITY_DN1392_c0_g1;TRINITY_DN1392_c0_g2;TRINITY_DN1344_c0_g1;TRINITY_DN1344_c0_g2;TRINITY_DN1400…
cytosolic small ribosomal subunit	cellular_component	GO:0022627	135	TRINITY_DN0_c5_g1;TRINITY_DN267_c1_g1;TRINITY_DN569_c0_g1;TRINITY_DN606_c0_g1;TRINITY_DN729_c1_g1;TRINITY_DN942_c0_g1;TRINITY_DN942_c0_g3;TRINITY_DN1303_c0_g1;TRINITY_DN1454_c1_g1;TRINITY_DN1756_c1_g1;TRINITY_DN1734_c1_g1;TRINITY_DN1734_c0_g1;TRINITY_DN1990_c7_g1;TRINITY_DN1992_c0_g1;TRINITY_DN2113_c0_g2;TRINITY_DN2376_c0_g1;TRINITY_DN2464_c0_g1;TRINITY_DN2434_c3_g1;TRINITY_DN2682_c0_g1;TRINITY_D…
calmodulin binding	molecular_function	GO:0005516	135	TRINITY_DN35_c0_g1;TRINITY_DN121_c1_g2;TRINITY_DN121_c1_g1;TRINITY_DN181_c0_g1;TRINITY_DN362_c0_g1;TRINITY_DN356_c0_g1;TRINITY_DN466_c2_g1;TRINITY_DN406_c0_g1;TRINITY_DN469_c1_g1;TRINITY_DN514_c0_g4;TRINITY_DN665_c0_g3;TRINITY_DN961_c1_g1;TRINITY_DN1005_c1_g1;TRINITY_DN1311_c0_g1;TRINITY_DN1468_c0_g1;TRINITY_DN1559_c1_g2;TRINITY_DN1740_c0_g1;TRINITY_DN1857_c0_g1;TRINITY_DN2015_c2_g1;TRINITY_DN204…
transcription cofactor activity	molecular_function	GO:0003712	135	TRINITY_DN52_c0_g2;TRINITY_DN10_c0_g1;TRINITY_DN10_c0_g2;TRINITY_DN62_c0_g1;TRINITY_DN43_c0_g1;TRINITY_DN0_c3_g1;TRINITY_DN111_c12_g1;TRINITY_DN178_c1_g1;TRINITY_DN219_c2_g1;TRINITY_DN293_c4_g1;TRINITY_DN233_c0_g1;TRINITY_DN354_c0_g2;TRINITY_DN344_c1_g1;TRINITY_DN491_c0_g1;TRINITY_DN463_c1_g1;TRINITY_DN439_c1_g2;TRINITY_DN439_c1_g1;TRINITY_DN586_c0_g5;TRINITY_DN586_c0_g1;TRINITY_DN796_c1_g1;TRINI…
cellular lipid metabolic process	biological_process	GO:0044255	134	TRINITY_DN55_c1_g1;TRINITY_DN168_c2_g1;TRINITY_DN178_c1_g1;TRINITY_DN197_c1_g1;TRINITY_DN248_c0_g1;TRINITY_DN248_c0_g2;TRINITY_DN220_c16_g1;TRINITY_DN329_c0_g1;TRINITY_DN372_c2_g1;TRINITY_DN414_c0_g1;TRINITY_DN414_c0_g3;TRINITY_DN847_c0_g1;TRINITY_DN903_c0_g1;TRINITY_DN1212_c0_g2;TRINITY_DN1345_c2_g1;TRINITY_DN1312_c0_g2;TRINITY_DN1449_c0_g1;TRINITY_DN1449_c0_g2;TRINITY_DN1401_c0_g1;TRINITY_DN147…
negative regulation of protein kinase activity	biological_process	GO:0006469	134	TRINITY_DN175_c0_g1;TRINITY_DN304_c0_g1;TRINITY_DN373_c0_g1;TRINITY_DN485_c1_g1;TRINITY_DN572_c6_g1;TRINITY_DN681_c0_g1;TRINITY_DN626_c0_g1;TRINITY_DN703_c1_g1;TRINITY_DN779_c2_g1;TRINITY_DN854_c0_g2;TRINITY_DN802_c0_g1;TRINITY_DN834_c1_g1;TRINITY_DN944_c0_g1;TRINITY_DN946_c7_g1;TRINITY_DN1263_c1_g2;TRINITY_DN1539_c0_g2;TRINITY_DN1549_c0_g1;TRINITY_DN1624_c0_g1;TRINITY_DN1716_c0_g1;TRINITY_DN1835…
protein homotetramerization	biological_process	GO:0051289	134	TRINITY_DN20_c0_g1;TRINITY_DN20_c0_g3;TRINITY_DN86_c2_g1;TRINITY_DN258_c7_g1;TRINITY_DN268_c0_g1;TRINITY_DN302_c0_g1;TRINITY_DN376_c0_g1;TRINITY_DN478_c4_g1;TRINITY_DN478_c4_g2;TRINITY_DN436_c0_g1;TRINITY_DN436_c0_g2;TRINITY_DN663_c12_g1;TRINITY_DN792_c1_g2;TRINITY_DN801_c0_g1;TRINITY_DN965_c0_g1;TRINITY_DN1158_c1_g1;TRINITY_DN1288_c1_g1;TRINITY_DN1476_c7_g1;TRINITY_DN1613_c0_g1;TRINITY_DN1920_c0…
phosphatidylinositol-mediated signaling	biological_process	GO:0048015	134	TRINITY_DN86_c3_g1;TRINITY_DN86_c3_g3;TRINITY_DN86_c3_g2;TRINITY_DN86_c1_g1;TRINITY_DN49_c0_g1;TRINITY_DN167_c1_g1;TRINITY_DN152_c0_g2;TRINITY_DN285_c0_g1;TRINITY_DN264_c0_g1;TRINITY_DN277_c0_g1;TRINITY_DN370_c2_g1;TRINITY_DN426_c0_g2;TRINITY_DN426_c0_g3;TRINITY_DN546_c0_g1;TRINITY_DN552_c0_g1;TRINITY_DN681_c0_g1;TRINITY_DN789_c0_g1;TRINITY_DN827_c0_g1;TRINITY_DN944_c0_g1;TRINITY_DN1065_c2_g1;TRI…
palate development	biological_process	GO:0060021	134	TRINITY_DN42_c0_g2;TRINITY_DN45_c1_g1;TRINITY_DN128_c4_g1;TRINITY_DN176_c3_g1;TRINITY_DN259_c0_g6;TRINITY_DN217_c0_g3;TRINITY_DN332_c4_g2;TRINITY_DN389_c0_g1;TRINITY_DN398_c0_g1;TRINITY_DN398_c0_g2;TRINITY_DN478_c1_g1;TRINITY_DN481_c1_g3;TRINITY_DN541_c2_g1;TRINITY_DN576_c0_g3;TRINITY_DN708_c1_g1;TRINITY_DN760_c3_g1;TRINITY_DN834_c0_g2;TRINITY_DN1506_c4_g1;TRINITY_DN1520_c0_g1;TRINITY_DN1541_c0_g…
beta-catenin binding	molecular_function	GO:0008013	134	TRINITY_DN165_c1_g2;TRINITY_DN109_c1_g1;TRINITY_DN293_c0_g1;TRINITY_DN336_c0_g1;TRINITY_DN315_c0_g2;TRINITY_DN494_c2_g2;TRINITY_DN485_c0_g1;TRINITY_DN562_c1_g2;TRINITY_DN508_c1_g1;TRINITY_DN520_c3_g1;TRINITY_DN766_c0_g4;TRINITY_DN766_c0_g1;TRINITY_DN712_c9_g1;TRINITY_DN876_c1_g1;TRINITY_DN895_c0_g1;TRINITY_DN872_c3_g1;TRINITY_DN904_c5_g1;TRINITY_DN980_c0_g2;TRINITY_DN903_c0_g1;TRINITY_DN906_c1_g2…
endoplasmic reticulum unfolded protein response	biological_process	GO:0030968	133	TRINITY_DN93_c4_g1;TRINITY_DN74_c0_g1;TRINITY_DN50_c1_g1;TRINITY_DN279_c0_g2;TRINITY_DN202_c0_g1;TRINITY_DN267_c2_g4;TRINITY_DN200_c0_g1;TRINITY_DN251_c12_g1;TRINITY_DN462_c5_g1;TRINITY_DN561_c1_g1;TRINITY_DN629_c0_g1;TRINITY_DN653_c1_g2;TRINITY_DN884_c0_g1;TRINITY_DN827_c0_g1;TRINITY_DN934_c0_g1;TRINITY_DN1093_c0_g1;TRINITY_DN1093_c0_g2;TRINITY_DN1174_c0_g1;TRINITY_DN1228_c9_g1;TRINITY_DN1322_c0…
regulation of GTPase activity	biological_process	GO:0043087	133	TRINITY_DN65_c0_g1;TRINITY_DN65_c0_g2;TRINITY_DN65_c0_g3;TRINITY_DN178_c0_g2;TRINITY_DN191_c0_g1;TRINITY_DN191_c0_g2;TRINITY_DN281_c1_g1;TRINITY_DN312_c0_g1;TRINITY_DN303_c0_g1;TRINITY_DN519_c0_g1;TRINITY_DN512_c0_g4;TRINITY_DN612_c0_g1;TRINITY_DN804_c1_g1;TRINITY_DN838_c0_g1;TRINITY_DN834_c1_g1;TRINITY_DN957_c0_g1;TRINITY_DN933_c0_g1;TRINITY_DN933_c0_g2;TRINITY_DN1171_c1_g2;TRINITY_DN1312_c0_g1;…
condensed chromosome kinetochore	cellular_component	GO:0000777	133	TRINITY_DN125_c0_g1;TRINITY_DN187_c0_g1;TRINITY_DN311_c0_g1;TRINITY_DN394_c2_g1;TRINITY_DN779_c4_g1;TRINITY_DN799_c0_g1;TRINITY_DN753_c0_g4;TRINITY_DN832_c1_g1;TRINITY_DN1154_c4_g1;TRINITY_DN1154_c1_g2;TRINITY_DN1182_c0_g1;TRINITY_DN1167_c1_g1;TRINITY_DN1422_c4_g1;TRINITY_DN1572_c1_g1;TRINITY_DN1684_c0_g2;TRINITY_DN1691_c0_g1;TRINITY_DN1638_c1_g2;TRINITY_DN1899_c0_g3;TRINITY_DN1946_c1_g1;TRINITY_…
response to organic substance	biological_process	GO:0010033	133	TRINITY_DN41_c0_g2;TRINITY_DN29_c3_g1;TRINITY_DN113_c1_g1;TRINITY_DN238_c0_g1;TRINITY_DN263_c2_g1;TRINITY_DN346_c1_g1;TRINITY_DN499_c0_g1;TRINITY_DN520_c3_g1;TRINITY_DN645_c0_g1;TRINITY_DN645_c0_g2;TRINITY_DN663_c2_g1;TRINITY_DN872_c3_g1;TRINITY_DN944_c0_g1;TRINITY_DN959_c0_g1;TRINITY_DN1075_c0_g1;TRINITY_DN1199_c0_g1;TRINITY_DN1155_c1_g1;TRINITY_DN1268_c0_g1;TRINITY_DN1558_c0_g1;TRINITY_DN1523_c…
xenophagy	biological_process	GO:0098792	133	TRINITY_DN130_c2_g1;TRINITY_DN223_c0_g2;TRINITY_DN263_c0_g1;TRINITY_DN337_c0_g1;TRINITY_DN337_c0_g2;TRINITY_DN337_c0_g3;TRINITY_DN350_c0_g1;TRINITY_DN491_c5_g1;TRINITY_DN546_c2_g1;TRINITY_DN582_c16_g1;TRINITY_DN692_c0_g2;TRINITY_DN736_c0_g1;TRINITY_DN833_c0_g1;TRINITY_DN802_c0_g1;TRINITY_DN1058_c6_g1;TRINITY_DN1099_c2_g1;TRINITY_DN1181_c1_g1;TRINITY_DN1113_c0_g1;TRINITY_DN1292_c0_g1;TRINITY_DN121…
tRNA processing	biological_process	GO:0008033	133	TRINITY_DN164_c2_g1;TRINITY_DN134_c1_g1;TRINITY_DN330_c0_g1;TRINITY_DN309_c0_g1;TRINITY_DN316_c0_g1;TRINITY_DN482_c1_g2;TRINITY_DN588_c0_g2;TRINITY_DN623_c3_g2;TRINITY_DN768_c12_g1;TRINITY_DN875_c0_g2;TRINITY_DN1046_c1_g1;TRINITY_DN1159_c0_g1;TRINITY_DN1758_c1_g1;TRINITY_DN1795_c0_g1;TRINITY_DN2088_c0_g1;TRINITY_DN2260_c0_g1;TRINITY_DN2366_c1_g1;TRINITY_DN2458_c1_g2;TRINITY_DN2417_c0_g1;TRINITY_D…
ossification	biological_process	GO:0001503	132	TRINITY_DN13_c0_g2;TRINITY_DN155_c1_g1;TRINITY_DN165_c1_g4;TRINITY_DN172_c1_g2;TRINITY_DN244_c0_g1;TRINITY_DN302_c0_g1;TRINITY_DN314_c1_g1;TRINITY_DN467_c7_g1;TRINITY_DN421_c0_g1;TRINITY_DN582_c1_g1;TRINITY_DN558_c0_g1;TRINITY_DN563_c0_g1;TRINITY_DN775_c0_g1;TRINITY_DN902_c0_g3;TRINITY_DN938_c0_g1;TRINITY_DN913_c5_g1;TRINITY_DN1030_c0_g1;TRINITY_DN1239_c3_g2;TRINITY_DN1203_c0_g3;TRINITY_DN1316_c0…
retina development in camera-type eye	biological_process	GO:0060041	132	TRINITY_DN21_c0_g3;TRINITY_DN134_c0_g1;TRINITY_DN148_c0_g1;TRINITY_DN259_c1_g1;TRINITY_DN259_c0_g6;TRINITY_DN220_c0_g1;TRINITY_DN321_c0_g1;TRINITY_DN505_c0_g1;TRINITY_DN767_c0_g1;TRINITY_DN767_c0_g2;TRINITY_DN772_c6_g1;TRINITY_DN793_c0_g1;TRINITY_DN780_c5_g1;TRINITY_DN1014_c0_g1;TRINITY_DN1272_c7_g2;TRINITY_DN1334_c0_g1;TRINITY_DN1473_c1_g2;TRINITY_DN1614_c0_g1;TRINITY_DN1697_c0_g2;TRINITY_DN1714…
stress fiber	cellular_component	GO:0001725	132	TRINITY_DN151_c6_g1;TRINITY_DN336_c0_g1;TRINITY_DN310_c0_g1;TRINITY_DN451_c2_g3;TRINITY_DN546_c4_g1;TRINITY_DN624_c2_g2;TRINITY_DN653_c1_g2;TRINITY_DN703_c1_g1;TRINITY_DN712_c9_g1;TRINITY_DN901_c8_g1;TRINITY_DN1230_c0_g2;TRINITY_DN1392_c0_g2;TRINITY_DN1434_c0_g2;TRINITY_DN1677_c0_g1;TRINITY_DN1822_c0_g2;TRINITY_DN1932_c0_g2;TRINITY_DN1932_c0_g3;TRINITY_DN1901_c0_g1;TRINITY_DN2089_c0_g1;TRINITY_DN…
host cell plasma membrane	cellular_component	GO:0020002	132	TRINITY_DN150_c0_g1;TRINITY_DN203_c0_g3;TRINITY_DN479_c1_g1;TRINITY_DN479_c6_g1;TRINITY_DN918_c0_g1;TRINITY_DN1104_c1_g4;TRINITY_DN1489_c3_g3;TRINITY_DN1834_c0_g1;TRINITY_DN1834_c2_g1;TRINITY_DN1924_c0_g1;TRINITY_DN2081_c0_g1;TRINITY_DN2178_c0_g1;TRINITY_DN2134_c0_g1;TRINITY_DN2306_c5_g1;TRINITY_DN2568_c0_g1;TRINITY_DN2873_c1_g1;TRINITY_DN3059_c0_g1;TRINITY_DN3017_c0_g1;TRINITY_DN3990_c0_g1;TRINI…
positive regulation of protein kinase B signaling	biological_process	GO:0051897	131	TRINITY_DN164_c1_g1;TRINITY_DN110_c4_g1;TRINITY_DN354_c0_g1;TRINITY_DN310_c0_g1;TRINITY_DN546_c0_g1;TRINITY_DN592_c0_g1;TRINITY_DN677_c1_g1;TRINITY_DN694_c0_g1;TRINITY_DN668_c0_g1;TRINITY_DN703_c1_g1;TRINITY_DN895_c0_g1;TRINITY_DN834_c1_g1;TRINITY_DN1044_c0_g1;TRINITY_DN1097_c0_g1;TRINITY_DN1272_c1_g1;TRINITY_DN1272_c1_g2;TRINITY_DN1237_c0_g1;TRINITY_DN1555_c0_g1;TRINITY_DN1546_c0_g1;TRINITY_DN15…
cellular response to tumor necrosis factor	biological_process	GO:0071356	131	TRINITY_DN189_c1_g1;TRINITY_DN110_c4_g1;TRINITY_DN205_c0_g1;TRINITY_DN612_c0_g1;TRINITY_DN770_c0_g1;TRINITY_DN704_c0_g1;TRINITY_DN809_c0_g1;TRINITY_DN842_c0_g1;TRINITY_DN815_c0_g1;TRINITY_DN968_c0_g1;TRINITY_DN1211_c0_g1;TRINITY_DN1264_c2_g1;TRINITY_DN1302_c3_g1;TRINITY_DN1420_c0_g2;TRINITY_DN1558_c0_g1;TRINITY_DN1558_c0_g2;TRINITY_DN1504_c0_g2;TRINITY_DN1569_c1_g2;TRINITY_DN1668_c0_g1;TRINITY_DN…
forebrain development	biological_process	GO:0030900	131	TRINITY_DN86_c3_g2;TRINITY_DN143_c0_g1;TRINITY_DN234_c0_g2;TRINITY_DN277_c0_g1;TRINITY_DN319_c1_g2;TRINITY_DN665_c1_g1;TRINITY_DN756_c0_g2;TRINITY_DN798_c0_g1;TRINITY_DN804_c1_g1;TRINITY_DN966_c0_g1;TRINITY_DN1328_c0_g2;TRINITY_DN1352_c0_g1;TRINITY_DN1352_c0_g2;TRINITY_DN1690_c0_g1;TRINITY_DN1623_c2_g1;TRINITY_DN1604_c0_g1;TRINITY_DN1828_c4_g2;TRINITY_DN1880_c2_g1;TRINITY_DN1808_c2_g1;TRINITY_DN2…
gene silencing by RNA	biological_process	GO:0031047	130	TRINITY_DN55_c3_g2;TRINITY_DN134_c1_g1;TRINITY_DN168_c0_g1;TRINITY_DN209_c0_g2;TRINITY_DN395_c0_g1;TRINITY_DN330_c0_g1;TRINITY_DN426_c0_g1;TRINITY_DN426_c0_g2;TRINITY_DN426_c0_g3;TRINITY_DN481_c1_g2;TRINITY_DN403_c0_g1;TRINITY_DN482_c1_g2;TRINITY_DN623_c3_g2;TRINITY_DN789_c0_g1;TRINITY_DN758_c0_g1;TRINITY_DN712_c1_g2;TRINITY_DN890_c0_g1;TRINITY_DN890_c0_g3;TRINITY_DN875_c0_g2;TRINITY_DN869_c0_g1;…
viral life cycle	biological_process	GO:0019058	129	TRINITY_DN134_c1_g1;TRINITY_DN330_c0_g1;TRINITY_DN316_c0_g1;TRINITY_DN482_c1_g2;TRINITY_DN432_c0_g1;TRINITY_DN432_c0_g3;TRINITY_DN623_c3_g2;TRINITY_DN733_c1_g1;TRINITY_DN875_c0_g2;TRINITY_DN989_c3_g1;TRINITY_DN1084_c1_g1;TRINITY_DN1503_c0_g1;TRINITY_DN1538_c2_g1;TRINITY_DN1665_c0_g2;TRINITY_DN1625_c2_g1;TRINITY_DN1758_c1_g1;TRINITY_DN1737_c1_g1;TRINITY_DN1747_c0_g1;TRINITY_DN2185_c2_g1;TRINITY_DN…
response to ionizing radiation	biological_process	GO:0010212	128	TRINITY_DN245_c3_g1;TRINITY_DN452_c0_g1;TRINITY_DN481_c1_g4;TRINITY_DN499_c0_g1;TRINITY_DN491_c2_g1;TRINITY_DN560_c2_g1;TRINITY_DN582_c3_g1;TRINITY_DN695_c0_g1;TRINITY_DN675_c2_g1;TRINITY_DN757_c1_g1;TRINITY_DN757_c1_g2;TRINITY_DN783_c2_g1;TRINITY_DN709_c1_g1;TRINITY_DN918_c0_g1;TRINITY_DN1195_c0_g1;TRINITY_DN1246_c0_g1;TRINITY_DN1315_c1_g1;TRINITY_DN1345_c2_g1;TRINITY_DN1396_c0_g1;TRINITY_DN1492…
stem cell population maintenance	biological_process	GO:0019827	128	TRINITY_DN86_c3_g1;TRINITY_DN86_c3_g3;TRINITY_DN86_c3_g4;TRINITY_DN62_c0_g1;TRINITY_DN45_c1_g1;TRINITY_DN76_c11_g1;TRINITY_DN31_c0_g1;TRINITY_DN180_c0_g2;TRINITY_DN125_c14_g1;TRINITY_DN240_c0_g1;TRINITY_DN325_c0_g2;TRINITY_DN520_c3_g1;TRINITY_DN646_c0_g2;TRINITY_DN740_c0_g1;TRINITY_DN1288_c15_g1;TRINITY_DN1235_c0_g1;TRINITY_DN1219_c0_g1;TRINITY_DN1363_c0_g2;TRINITY_DN1374_c1_g1;TRINITY_DN1378_c0_…
outer membrane-bounded periplasmic space	cellular_component	GO:0030288	128	TRINITY_DN8369_c0_g1;TRINITY_DN12175_c0_g7;TRINITY_DN12927_c0_g2;TRINITY_DN13595_c0_g5;TRINITY_DN13595_c0_g1;TRINITY_DN13595_c0_g3;TRINITY_DN14225_c0_g7;TRINITY_DN16340_c0_g6;TRINITY_DN16340_c0_g10;TRINITY_DN16340_c0_g11;TRINITY_DN17256_c0_g5;TRINITY_DN17256_c0_g2;TRINITY_DN17216_c0_g1;TRINITY_DN17506_c0_g7;TRINITY_DN19204_c0_g9;TRINITY_DN19375_c1_g4;TRINITY_DN19438_c0_g9;TRINITY_DN19438_c0_g13;T…
catalytic activity	molecular_function	GO:0003824	127	TRINITY_DN102_c0_g2;TRINITY_DN102_c0_g3;TRINITY_DN277_c0_g1;TRINITY_DN665_c0_g1;TRINITY_DN804_c0_g1;TRINITY_DN1080_c2_g1;TRINITY_DN1069_c0_g1;TRINITY_DN1002_c1_g1;TRINITY_DN1492_c4_g1;TRINITY_DN1662_c0_g1;TRINITY_DN1758_c0_g1;TRINITY_DN2008_c0_g1;TRINITY_DN2061_c0_g1;TRINITY_DN2199_c3_g1;TRINITY_DN2235_c0_g1;TRINITY_DN2424_c0_g1;TRINITY_DN2589_c0_g1;TRINITY_DN2530_c0_g1;TRINITY_DN3574_c0_g1;TRINI…
cell morphogenesis	biological_process	GO:0000902	127	TRINITY_DN125_c10_g2;TRINITY_DN110_c4_g1;TRINITY_DN178_c1_g1;TRINITY_DN258_c0_g1;TRINITY_DN200_c0_g1;TRINITY_DN378_c2_g1;TRINITY_DN319_c2_g1;TRINITY_DN359_c0_g1;TRINITY_DN440_c1_g1;TRINITY_DN453_c0_g2;TRINITY_DN555_c0_g1;TRINITY_DN555_c0_g2;TRINITY_DN694_c0_g1;TRINITY_DN785_c1_g3;TRINITY_DN785_c1_g1;TRINITY_DN871_c1_g2;TRINITY_DN849_c0_g2;TRINITY_DN849_c0_g3;TRINITY_DN928_c0_g1;TRINITY_DN928_c0_g…
p53 binding	molecular_function	GO:0002039	127	TRINITY_DN46_c3_g1;TRINITY_DN19_c1_g1;TRINITY_DN165_c1_g3;TRINITY_DN165_c1_g2;TRINITY_DN187_c0_g1;TRINITY_DN264_c0_g1;TRINITY_DN312_c2_g1;TRINITY_DN319_c0_g2;TRINITY_DN452_c0_g1;TRINITY_DN491_c3_g2;TRINITY_DN414_c0_g1;TRINITY_DN630_c0_g1;TRINITY_DN859_c0_g2;TRINITY_DN906_c1_g2;TRINITY_DN906_c1_g1;TRINITY_DN1164_c1_g1;TRINITY_DN1445_c0_g1;TRINITY_DN1575_c2_g1;TRINITY_DN1608_c0_g2;TRINITY_DN1605_c0…
rhythmic process	biological_process	GO:0048511	126	TRINITY_DN165_c1_g3;TRINITY_DN288_c2_g1;TRINITY_DN233_c0_g1;TRINITY_DN277_c0_g2;TRINITY_DN332_c1_g1;TRINITY_DN348_c0_g2;TRINITY_DN477_c0_g3;TRINITY_DN576_c0_g1;TRINITY_DN665_c2_g1;TRINITY_DN611_c1_g1;TRINITY_DN790_c0_g1;TRINITY_DN792_c0_g1;TRINITY_DN792_c0_g2;TRINITY_DN769_c0_g1;TRINITY_DN845_c0_g1;TRINITY_DN819_c0_g1;TRINITY_DN819_c9_g1;TRINITY_DN1146_c0_g4;TRINITY_DN1194_c0_g2;TRINITY_DN1342_c1…
positive regulation of neuron differentiation	biological_process	GO:0045666	126	TRINITY_DN86_c3_g1;TRINITY_DN86_c3_g3;TRINITY_DN86_c3_g4;TRINITY_DN75_c1_g2;TRINITY_DN28_c0_g3;TRINITY_DN205_c2_g1;TRINITY_DN319_c1_g1;TRINITY_DN460_c0_g1;TRINITY_DN512_c0_g2;TRINITY_DN561_c0_g2;TRINITY_DN545_c0_g1;TRINITY_DN677_c1_g1;TRINITY_DN823_c0_g1;TRINITY_DN932_c1_g1;TRINITY_DN1283_c2_g1;TRINITY_DN1264_c1_g1;TRINITY_DN1486_c0_g2;TRINITY_DN1621_c1_g1;TRINITY_DN1769_c0_g2;TRINITY_DN1963_c1_g…
female pregnancy	biological_process	GO:0007565	126	TRINITY_DN13_c0_g1;TRINITY_DN156_c1_g2;TRINITY_DN314_c1_g1;TRINITY_DN362_c0_g1;TRINITY_DN408_c0_g1;TRINITY_DN431_c0_g1;TRINITY_DN583_c0_g1;TRINITY_DN686_c0_g1;TRINITY_DN663_c2_g1;TRINITY_DN863_c0_g1;TRINITY_DN1092_c0_g4;TRINITY_DN1092_c0_g1;TRINITY_DN1097_c0_g1;TRINITY_DN1062_c0_g1;TRINITY_DN1084_c1_g1;TRINITY_DN1489_c3_g1;TRINITY_DN1513_c0_g1;TRINITY_DN1687_c0_g1;TRINITY_DN1735_c1_g1;TRINITY_DN1…
symporter activity	molecular_function	GO:0015293	126	TRINITY_DN76_c0_g5;TRINITY_DN556_c0_g1;TRINITY_DN629_c1_g1;TRINITY_DN732_c0_g1;TRINITY_DN1002_c0_g3;TRINITY_DN1264_c4_g1;TRINITY_DN1769_c1_g1;TRINITY_DN1819_c0_g2;TRINITY_DN1819_c0_g1;TRINITY_DN1805_c5_g1;TRINITY_DN1995_c0_g1;TRINITY_DN2113_c0_g1;TRINITY_DN2204_c2_g2;TRINITY_DN2204_c2_g1;TRINITY_DN2779_c0_g2;TRINITY_DN2863_c0_g1;TRINITY_DN2812_c1_g1;TRINITY_DN2948_c0_g1;TRINITY_DN3148_c0_g1;TRINI…
secretory granule	cellular_component	GO:0030141	126	TRINITY_DN10_c1_g1;TRINITY_DN111_c1_g1;TRINITY_DN114_c0_g1;TRINITY_DN156_c1_g2;TRINITY_DN296_c3_g1;TRINITY_DN327_c1_g1;TRINITY_DN412_c0_g1;TRINITY_DN469_c0_g1;TRINITY_DN546_c3_g1;TRINITY_DN576_c0_g2;TRINITY_DN885_c0_g3;TRINITY_DN850_c0_g1;TRINITY_DN919_c0_g1;TRINITY_DN913_c2_g1;TRINITY_DN1044_c0_g1;TRINITY_DN1206_c1_g1;TRINITY_DN1203_c0_g3;TRINITY_DN1420_c0_g2;TRINITY_DN1687_c0_g1;TRINITY_DN2017_…
nuclear pore	cellular_component	GO:0005643	126	TRINITY_DN134_c1_g1;TRINITY_DN330_c0_g1;TRINITY_DN482_c1_g2;TRINITY_DN623_c3_g2;TRINITY_DN682_c0_g1;TRINITY_DN656_c0_g2;TRINITY_DN733_c1_g1;TRINITY_DN942_c2_g1;TRINITY_DN1217_c1_g1;TRINITY_DN1316_c2_g1;TRINITY_DN1435_c1_g1;TRINITY_DN1645_c0_g1;TRINITY_DN1758_c1_g1;TRINITY_DN1754_c3_g1;TRINITY_DN1773_c0_g5;TRINITY_DN1773_c0_g1;TRINITY_DN1773_c0_g3;TRINITY_DN1747_c0_g1;TRINITY_DN1865_c0_g1;TRINITY_…
mitochondrial intermembrane space	cellular_component	GO:0005758	126	TRINITY_DN237_c3_g1;TRINITY_DN352_c1_g1;TRINITY_DN572_c1_g1;TRINITY_DN819_c1_g2;TRINITY_DN819_c1_g1;TRINITY_DN1022_c0_g1;TRINITY_DN1007_c1_g1;TRINITY_DN1152_c14_g1;TRINITY_DN1228_c1_g2;TRINITY_DN1228_c1_g1;TRINITY_DN1294_c2_g1;TRINITY_DN1345_c2_g1;TRINITY_DN1425_c0_g1;TRINITY_DN1434_c0_g3;TRINITY_DN1652_c0_g3;TRINITY_DN1973_c0_g1;TRINITY_DN1995_c4_g1;TRINITY_DN1933_c0_g2;TRINITY_DN2121_c8_g1;TRIN…
translational initiation	biological_process	GO:0006413	125	TRINITY_DN31_c1_g1;TRINITY_DN186_c1_g1;TRINITY_DN251_c1_g3;TRINITY_DN432_c0_g1;TRINITY_DN432_c0_g3;TRINITY_DN505_c0_g1;TRINITY_DN628_c0_g1;TRINITY_DN784_c0_g1;TRINITY_DN784_c0_g2;TRINITY_DN722_c0_g1;TRINITY_DN936_c1_g1;TRINITY_DN989_c3_g1;TRINITY_DN1015_c1_g1;TRINITY_DN1328_c3_g1;TRINITY_DN1579_c0_g1;TRINITY_DN1659_c0_g1;TRINITY_DN1625_c2_g1;TRINITY_DN1721_c0_g1;TRINITY_DN1890_c0_g1;TRINITY_DN194…
carboxylic ester hydrolase activity	molecular_function	GO:0052689	125	TRINITY_DN59_c0_g1;TRINITY_DN195_c1_g1;TRINITY_DN182_c0_g1;TRINITY_DN220_c7_g1;TRINITY_DN839_c0_g1;TRINITY_DN1408_c0_g1;TRINITY_DN1459_c4_g1;TRINITY_DN1459_c1_g1;TRINITY_DN1459_c0_g1;TRINITY_DN1459_c0_g2;TRINITY_DN1567_c0_g1;TRINITY_DN1552_c6_g1;TRINITY_DN1880_c1_g1;TRINITY_DN1841_c0_g1;TRINITY_DN2114_c0_g1;TRINITY_DN2768_c4_g1;TRINITY_DN2910_c0_g1;TRINITY_DN3398_c0_g4;TRINITY_DN3398_c0_g6;TRINIT…
mitochondrion organization	biological_process	GO:0007005	124	TRINITY_DN29_c5_g1;TRINITY_DN184_c1_g2;TRINITY_DN214_c0_g1;TRINITY_DN293_c0_g1;TRINITY_DN317_c0_g1;TRINITY_DN322_c7_g1;TRINITY_DN533_c1_g1;TRINITY_DN543_c1_g1;TRINITY_DN548_c0_g1;TRINITY_DN572_c6_g1;TRINITY_DN916_c0_g1;TRINITY_DN989_c1_g1;TRINITY_DN1077_c2_g1;TRINITY_DN1282_c11_g1;TRINITY_DN1266_c0_g1;TRINITY_DN1425_c0_g1;TRINITY_DN1446_c0_g1;TRINITY_DN1428_c2_g1;TRINITY_DN1608_c0_g2;TRINITY_DN16…
positive regulation of cell growth	biological_process	GO:0030307	124	TRINITY_DN189_c1_g1;TRINITY_DN157_c0_g1;TRINITY_DN267_c2_g4;TRINITY_DN283_c0_g1;TRINITY_DN362_c0_g1;TRINITY_DN379_c2_g2;TRINITY_DN462_c5_g1;TRINITY_DN462_c1_g1;TRINITY_DN561_c3_g2;TRINITY_DN528_c0_g1;TRINITY_DN944_c0_g1;TRINITY_DN1077_c2_g1;TRINITY_DN1375_c1_g1;TRINITY_DN1579_c0_g1;TRINITY_DN1561_c0_g1;TRINITY_DN1506_c4_g1;TRINITY_DN2020_c1_g2;TRINITY_DN2020_c1_g1;TRINITY_DN2160_c0_g1;TRINITY_DN2…
tricarboxylic acid cycle	biological_process	GO:0006099	124	TRINITY_DN8_c0_g1;TRINITY_DN465_c3_g1;TRINITY_DN988_c0_g1;TRINITY_DN1176_c0_g1;TRINITY_DN1295_c2_g2;TRINITY_DN1526_c0_g1;TRINITY_DN1751_c0_g1;TRINITY_DN2679_c7_g1;TRINITY_DN2887_c0_g1;TRINITY_DN3056_c1_g1;TRINITY_DN3189_c0_g1;TRINITY_DN3723_c0_g1;TRINITY_DN3820_c1_g2;TRINITY_DN3970_c0_g1;TRINITY_DN4347_c1_g1;TRINITY_DN4507_c0_g5;TRINITY_DN4507_c0_g1;TRINITY_DN4689_c2_g1;TRINITY_DN5030_c0_g1;TRINI…
negative regulation of epithelial cell proliferation	biological_process	GO:0050680	124	TRINITY_DN86_c3_g2;TRINITY_DN8_c1_g1;TRINITY_DN29_c0_g2;TRINITY_DN217_c0_g3;TRINITY_DN377_c0_g1;TRINITY_DN337_c0_g1;TRINITY_DN337_c0_g2;TRINITY_DN337_c0_g3;TRINITY_DN389_c0_g1;TRINITY_DN512_c0_g2;TRINITY_DN634_c2_g1;TRINITY_DN612_c0_g1;TRINITY_DN756_c0_g2;TRINITY_DN844_c0_g1;TRINITY_DN802_c0_g1;TRINITY_DN1065_c2_g1;TRINITY_DN1487_c0_g1;TRINITY_DN1473_c1_g2;TRINITY_DN1697_c0_g2;TRINITY_DN1740_c1_g…
response to calcium ion	biological_process	GO:0051592	124	TRINITY_DN50_c1_g1;TRINITY_DN165_c0_g2;TRINITY_DN251_c0_g1;TRINITY_DN678_c3_g1;TRINITY_DN733_c0_g1;TRINITY_DN813_c0_g1;TRINITY_DN1044_c0_g1;TRINITY_DN1311_c0_g1;TRINITY_DN1325_c0_g1;TRINITY_DN1350_c0_g1;TRINITY_DN1599_c0_g1;TRINITY_DN1608_c0_g2;TRINITY_DN1973_c0_g1;TRINITY_DN1978_c1_g1;TRINITY_DN2066_c1_g1;TRINITY_DN2064_c0_g1;TRINITY_DN2076_c8_g2;TRINITY_DN2231_c2_g2;TRINITY_DN2341_c1_g1;TRINITY…
hemopoiesis	biological_process	GO:0030097	124	TRINITY_DN0_c6_g1;TRINITY_DN66_c0_g1;TRINITY_DN203_c1_g1;TRINITY_DN312_c1_g2;TRINITY_DN312_c1_g1;TRINITY_DN342_c0_g1;TRINITY_DN356_c0_g1;TRINITY_DN372_c3_g1;TRINITY_DN496_c1_g1;TRINITY_DN572_c1_g1;TRINITY_DN624_c2_g2;TRINITY_DN785_c2_g1;TRINITY_DN871_c0_g1;TRINITY_DN871_c0_g3;TRINITY_DN863_c0_g1;TRINITY_DN983_c0_g6;TRINITY_DN1055_c1_g1;TRINITY_DN1288_c15_g1;TRINITY_DN1378_c0_g1;TRINITY_DN1541_c0_…
anchored component of membrane	cellular_component	GO:0031225	124	TRINITY_DN194_c0_g1;TRINITY_DN453_c0_g1;TRINITY_DN765_c0_g1;TRINITY_DN794_c0_g1;TRINITY_DN942_c0_g1;TRINITY_DN1306_c1_g1;TRINITY_DN1567_c0_g1;TRINITY_DN1541_c0_g1;TRINITY_DN1783_c1_g1;TRINITY_DN1729_c0_g2;TRINITY_DN1809_c0_g1;TRINITY_DN2177_c0_g2;TRINITY_DN2282_c0_g1;TRINITY_DN2439_c0_g2;TRINITY_DN2598_c1_g1;TRINITY_DN2678_c3_g1;TRINITY_DN2657_c0_g1;TRINITY_DN2850_c6_g1;TRINITY_DN3099_c0_g1;TRINI…
activation of cysteine-type endopeptidase activity involved in apoptotic process	biological_process	GO:0006919	124	TRINITY_DN415_c4_g1;TRINITY_DN423_c0_g1;TRINITY_DN538_c1_g2;TRINITY_DN572_c6_g1;TRINITY_DN809_c0_g1;TRINITY_DN844_c0_g1;TRINITY_DN961_c2_g1;TRINITY_DN1022_c0_g1;TRINITY_DN1065_c1_g1;TRINITY_DN1148_c3_g1;TRINITY_DN1102_c0_g2;TRINITY_DN1558_c0_g1;TRINITY_DN1675_c0_g1;TRINITY_DN1624_c0_g1;TRINITY_DN1783_c0_g1;TRINITY_DN1867_c1_g1;TRINITY_DN1955_c0_g1;TRINITY_DN2076_c8_g2;TRINITY_DN2191_c2_g1;TRINITY…
transmembrane signaling receptor activity	molecular_function	GO:0004888	124	TRINITY_DN13_c0_g1;TRINITY_DN118_c1_g1;TRINITY_DN191_c0_g2;TRINITY_DN216_c1_g1;TRINITY_DN301_c0_g1;TRINITY_DN353_c0_g2;TRINITY_DN504_c0_g1;TRINITY_DN678_c0_g1;TRINITY_DN825_c0_g2;TRINITY_DN1092_c0_g3;TRINITY_DN1386_c0_g2;TRINITY_DN1438_c0_g1;TRINITY_DN1692_c0_g1;TRINITY_DN1692_c0_g3;TRINITY_DN2252_c0_g1;TRINITY_DN2909_c0_g1;TRINITY_DN3019_c0_g1;TRINITY_DN3056_c1_g2;TRINITY_DN3195_c0_g2;TRINITY_DN…
nuclear chromosome, telomeric region	cellular_component	GO:0000784	123	TRINITY_DN187_c0_g1;TRINITY_DN322_c7_g2;TRINITY_DN320_c0_g1;TRINITY_DN382_c0_g1;TRINITY_DN372_c0_g1;TRINITY_DN494_c0_g2;TRINITY_DN546_c1_g1;TRINITY_DN695_c0_g1;TRINITY_DN730_c0_g1;TRINITY_DN720_c1_g1;TRINITY_DN795_c0_g1;TRINITY_DN819_c0_g1;TRINITY_DN987_c0_g1;TRINITY_DN1172_c0_g1;TRINITY_DN1132_c1_g1;TRINITY_DN1260_c0_g4;TRINITY_DN1260_c0_g1;TRINITY_DN1362_c0_g1;TRINITY_DN1487_c0_g1;TRINITY_DN171…
actin filament organization	biological_process	GO:0007015	123	TRINITY_DN178_c0_g2;TRINITY_DN259_c5_g1;TRINITY_DN275_c1_g2;TRINITY_DN387_c4_g1;TRINITY_DN387_c2_g1;TRINITY_DN337_c0_g1;TRINITY_DN376_c0_g1;TRINITY_DN306_c4_g1;TRINITY_DN760_c4_g1;TRINITY_DN763_c0_g1;TRINITY_DN1259_c0_g1;TRINITY_DN1210_c1_g1;TRINITY_DN1304_c7_g1;TRINITY_DN1401_c0_g1;TRINITY_DN1448_c0_g1;TRINITY_DN1457_c0_g1;TRINITY_DN1517_c0_g2;TRINITY_DN1517_c0_g3;TRINITY_DN1808_c0_g1;TRINITY_DN…
T cell receptor signaling pathway	biological_process	GO:0050852	123	TRINITY_DN152_c0_g2;TRINITY_DN110_c4_g1;TRINITY_DN135_c0_g1;TRINITY_DN452_c0_g1;TRINITY_DN494_c2_g2;TRINITY_DN546_c1_g1;TRINITY_DN548_c5_g2;TRINITY_DN682_c1_g2;TRINITY_DN653_c1_g1;TRINITY_DN1077_c0_g1;TRINITY_DN1107_c0_g1;TRINITY_DN1140_c8_g1;TRINITY_DN1250_c0_g1;TRINITY_DN1490_c1_g1;TRINITY_DN1496_c0_g1;TRINITY_DN1656_c1_g1;TRINITY_DN1724_c0_g1;TRINITY_DN1766_c0_g5;TRINITY_DN1766_c0_g1;TRINITY_D…
dephosphorylation	biological_process	GO:0016311	123	TRINITY_DN20_c0_g1;TRINITY_DN165_c0_g1;TRINITY_DN130_c1_g1;TRINITY_DN197_c1_g1;TRINITY_DN237_c0_g4;TRINITY_DN237_c0_g2;TRINITY_DN393_c0_g1;TRINITY_DN346_c1_g1;TRINITY_DN653_c3_g1;TRINITY_DN679_c0_g1;TRINITY_DN679_c2_g1;TRINITY_DN794_c0_g1;TRINITY_DN849_c3_g1;TRINITY_DN891_c0_g1;TRINITY_DN891_c0_g2;TRINITY_DN953_c0_g1;TRINITY_DN1022_c2_g1;TRINITY_DN1062_c1_g2;TRINITY_DN1062_c1_g1;TRINITY_DN1311_c0…
methyltransferase activity	molecular_function	GO:0008168	123	TRINITY_DN46_c0_g1;TRINITY_DN46_c0_g2;TRINITY_DN164_c2_g1;TRINITY_DN174_c3_g1;TRINITY_DN204_c0_g1;TRINITY_DN220_c0_g1;TRINITY_DN918_c0_g1;TRINITY_DN1182_c0_g1;TRINITY_DN1875_c1_g1;TRINITY_DN1827_c4_g1;TRINITY_DN1887_c0_g1;TRINITY_DN1809_c5_g1;TRINITY_DN2046_c0_g1;TRINITY_DN2073_c0_g1;TRINITY_DN2226_c8_g1;TRINITY_DN2226_c8_g3;TRINITY_DN2243_c0_g1;TRINITY_DN2243_c0_g2;TRINITY_DN2354_c0_g1;TRINITY_D…
response to estrogen	biological_process	GO:0043627	123	TRINITY_DN10_c1_g1;TRINITY_DN41_c0_g2;TRINITY_DN29_c3_g1;TRINITY_DN43_c0_g1;TRINITY_DN13_c0_g1;TRINITY_DN165_c1_g2;TRINITY_DN110_c4_g1;TRINITY_DN156_c1_g2;TRINITY_DN243_c0_g1;TRINITY_DN319_c0_g1;TRINITY_DN463_c0_g1;TRINITY_DN560_c2_g1;TRINITY_DN529_c0_g1;TRINITY_DN783_c2_g1;TRINITY_DN986_c0_g1;TRINITY_DN986_c0_g3;TRINITY_DN1084_c1_g1;TRINITY_DN1239_c3_g2;TRINITY_DN1345_c2_g1;TRINITY_DN1590_c0_g3;…
circadian regulation of gene expression	biological_process	GO:0032922	123	TRINITY_DN85_c2_g1;TRINITY_DN13_c2_g2;TRINITY_DN13_c2_g1;TRINITY_DN33_c0_g1;TRINITY_DN248_c0_g1;TRINITY_DN248_c0_g2;TRINITY_DN216_c1_g1;TRINITY_DN204_c0_g1;TRINITY_DN277_c0_g1;TRINITY_DN377_c0_g1;TRINITY_DN329_c0_g1;TRINITY_DN307_c2_g1;TRINITY_DN531_c0_g1;TRINITY_DN508_c0_g3;TRINITY_DN517_c0_g1;TRINITY_DN617_c0_g1;TRINITY_DN746_c0_g1;TRINITY_DN803_c2_g1;TRINITY_DN829_c2_g2;TRINITY_DN834_c0_g1;TRI…
positive regulation of peptidyl-tyrosine phosphorylation	biological_process	GO:0050731	123	TRINITY_DN86_c3_g2;TRINITY_DN153_c1_g1;TRINITY_DN319_c0_g2;TRINITY_DN452_c0_g1;TRINITY_DN459_c0_g1;TRINITY_DN521_c0_g1;TRINITY_DN545_c0_g1;TRINITY_DN572_c1_g1;TRINITY_DN718_c0_g2;TRINITY_DN756_c0_g2;TRINITY_DN825_c0_g2;TRINITY_DN957_c0_g1;TRINITY_DN1070_c2_g3;TRINITY_DN1118_c1_g1;TRINITY_DN1237_c0_g1;TRINITY_DN1418_c3_g1;TRINITY_DN1516_c0_g1;TRINITY_DN1546_c0_g1;TRINITY_DN1687_c0_g1;TRINITY_DN187…
cellular response to UV	biological_process	GO:0034644	122	TRINITY_DN0_c28_g2;TRINITY_DN196_c0_g2;TRINITY_DN183_c1_g1;TRINITY_DN165_c1_g3;TRINITY_DN165_c1_g2;TRINITY_DN245_c3_g1;TRINITY_DN491_c3_g2;TRINITY_DN630_c0_g1;TRINITY_DN784_c0_g1;TRINITY_DN784_c0_g2;TRINITY_DN795_c0_g1;TRINITY_DN884_c0_g1;TRINITY_DN892_c0_g1;TRINITY_DN1017_c0_g1;TRINITY_DN1093_c0_g1;TRINITY_DN1093_c0_g2;TRINITY_DN1127_c0_g1;TRINITY_DN1396_c0_g1;TRINITY_DN1558_c0_g1;TRINITY_DN1558…
positive regulation of protein binding	biological_process	GO:0032092	122	TRINITY_DN32_c0_g1;TRINITY_DN76_c0_g1;TRINITY_DN165_c1_g2;TRINITY_DN244_c3_g1;TRINITY_DN200_c0_g1;TRINITY_DN217_c0_g3;TRINITY_DN387_c4_g1;TRINITY_DN405_c1_g1;TRINITY_DN406_c0_g1;TRINITY_DN512_c0_g2;TRINITY_DN502_c0_g1;TRINITY_DN607_c0_g1;TRINITY_DN653_c1_g2;TRINITY_DN723_c1_g2;TRINITY_DN769_c0_g1;TRINITY_DN895_c0_g1;TRINITY_DN802_c0_g1;TRINITY_DN957_c0_g1;TRINITY_DN1030_c0_g1;TRINITY_DN1361_c0_g1…
tumor necrosis factor-mediated signaling pathway	biological_process	GO:0033209	121	TRINITY_DN455_c2_g1;TRINITY_DN566_c0_g2;TRINITY_DN548_c5_g2;TRINITY_DN682_c1_g2;TRINITY_DN768_c0_g2;TRINITY_DN842_c0_g1;TRINITY_DN1028_c0_g1;TRINITY_DN1077_c0_g1;TRINITY_DN1107_c0_g1;TRINITY_DN1108_c0_g1;TRINITY_DN1103_c1_g1;TRINITY_DN1285_c0_g2;TRINITY_DN1250_c0_g1;TRINITY_DN1223_c0_g1;TRINITY_DN1426_c0_g1;TRINITY_DN1647_c1_g1;TRINITY_DN1656_c1_g1;TRINITY_DN1867_c1_g1;TRINITY_DN2044_c0_g1;TRINIT…
activation of protein kinase activity	biological_process	GO:0032147	121	TRINITY_DN21_c0_g1;TRINITY_DN83_c1_g1;TRINITY_DN164_c1_g1;TRINITY_DN115_c0_g1;TRINITY_DN297_c8_g1;TRINITY_DN217_c2_g1;TRINITY_DN395_c1_g1;TRINITY_DN333_c0_g1;TRINITY_DN452_c0_g1;TRINITY_DN513_c0_g1;TRINITY_DN540_c0_g3;TRINITY_DN764_c1_g1;TRINITY_DN798_c5_g1;TRINITY_DN966_c1_g1;TRINITY_DN1118_c1_g1;TRINITY_DN1200_c0_g1;TRINITY_DN1360_c0_g1;TRINITY_DN1481_c0_g2;TRINITY_DN1490_c1_g1;TRINITY_DN1516_c…
cell body	cellular_component	GO:0044297	121	TRINITY_DN21_c0_g2;TRINITY_DN49_c2_g1;TRINITY_DN293_c0_g1;TRINITY_DN485_c1_g1;TRINITY_DN455_c0_g1;TRINITY_DN653_c0_g1;TRINITY_DN863_c0_g1;TRINITY_DN801_c0_g1;TRINITY_DN1027_c0_g1;TRINITY_DN1070_c1_g1;TRINITY_DN1156_c3_g1;TRINITY_DN1162_c0_g1;TRINITY_DN1275_c0_g1;TRINITY_DN1275_c0_g2;TRINITY_DN1275_c0_g3;TRINITY_DN1263_c6_g1;TRINITY_DN1204_c1_g1;TRINITY_DN1287_c2_g1;TRINITY_DN1843_c0_g1;TRINITY_DN…
cholesterol homeostasis	biological_process	GO:0042632	121	TRINITY_DN132_c0_g2;TRINITY_DN159_c1_g1;TRINITY_DN372_c2_g1;TRINITY_DN486_c0_g1;TRINITY_DN650_c0_g1;TRINITY_DN746_c0_g1;TRINITY_DN1093_c2_g1;TRINITY_DN1189_c0_g1;TRINITY_DN1189_c0_g2;TRINITY_DN1390_c2_g3;TRINITY_DN1568_c2_g2;TRINITY_DN1522_c0_g1;TRINITY_DN1522_c0_g2;TRINITY_DN1527_c1_g1;TRINITY_DN1636_c0_g2;TRINITY_DN1653_c0_g1;TRINITY_DN1653_c0_g2;TRINITY_DN2221_c1_g2;TRINITY_DN2394_c0_g1;TRINIT…
transcriptional activator activity, RNA polymerase II transcription regulatory region sequence-specific binding	molecular_function	GO:0001228	121	TRINITY_DN44_c0_g1;TRINITY_DN165_c1_g3;TRINITY_DN165_c1_g2;TRINITY_DN165_c1_g4;TRINITY_DN110_c4_g1;TRINITY_DN276_c0_g1;TRINITY_DN352_c3_g1;TRINITY_DN319_c0_g1;TRINITY_DN319_c0_g2;TRINITY_DN372_c3_g1;TRINITY_DN481_c1_g3;TRINITY_DN428_c7_g1;TRINITY_DN760_c3_g1;TRINITY_DN858_c0_g1;TRINITY_DN1323_c0_g2;TRINITY_DN1371_c0_g2;TRINITY_DN1322_c0_g1;TRINITY_DN1322_c0_g2;TRINITY_DN1340_c0_g2;TRINITY_DN1447_…
response to heat	biological_process	GO:0009408	120	TRINITY_DN50_c5_g1;TRINITY_DN31_c1_g1;TRINITY_DN11_c0_g1;TRINITY_DN480_c0_g1;TRINITY_DN420_c2_g1;TRINITY_DN428_c3_g1;TRINITY_DN505_c0_g1;TRINITY_DN572_c6_g1;TRINITY_DN645_c0_g1;TRINITY_DN645_c0_g2;TRINITY_DN836_c0_g1;TRINITY_DN944_c0_g1;TRINITY_DN1149_c1_g1;TRINITY_DN1523_c0_g1;TRINITY_DN1504_c0_g2;TRINITY_DN1624_c0_g1;TRINITY_DN1719_c0_g1;TRINITY_DN1887_c0_g1;TRINITY_DN1996_c0_g1;TRINITY_DN2065_…
negative regulation of protein phosphorylation	biological_process	GO:0001933	120	TRINITY_DN76_c0_g1;TRINITY_DN164_c1_g1;TRINITY_DN277_c0_g1;TRINITY_DN352_c4_g1;TRINITY_DN373_c0_g1;TRINITY_DN546_c1_g2;TRINITY_DN588_c0_g1;TRINITY_DN572_c1_g1;TRINITY_DN626_c0_g1;TRINITY_DN612_c0_g1;TRINITY_DN728_c3_g1;TRINITY_DN854_c0_g2;TRINITY_DN966_c1_g1;TRINITY_DN961_c2_g1;TRINITY_DN1172_c0_g3;TRINITY_DN1102_c0_g2;TRINITY_DN1437_c0_g1;TRINITY_DN1710_c0_g1;TRINITY_DN1777_c3_g5;TRINITY_DN1764_…
DNA duplex unwinding	biological_process	GO:0032508	120	TRINITY_DN255_c8_g1;TRINITY_DN257_c0_g1;TRINITY_DN382_c0_g1;TRINITY_DN697_c0_g1;TRINITY_DN611_c0_g2;TRINITY_DN746_c1_g2;TRINITY_DN720_c0_g1;TRINITY_DN908_c0_g1;TRINITY_DN906_c1_g2;TRINITY_DN906_c1_g1;TRINITY_DN1042_c0_g1;TRINITY_DN1579_c0_g1;TRINITY_DN1775_c0_g1;TRINITY_DN1775_c0_g3;TRINITY_DN1756_c0_g1;TRINITY_DN1910_c0_g2;TRINITY_DN2078_c0_g1;TRINITY_DN2032_c0_g1;TRINITY_DN2326_c1_g1;TRINITY_DN…
clathrin-coated vesicle	cellular_component	GO:0030136	120	TRINITY_DN17_c0_g1;TRINITY_DN98_c1_g1;TRINITY_DN188_c1_g1;TRINITY_DN124_c0_g1;TRINITY_DN288_c6_g1;TRINITY_DN312_c1_g2;TRINITY_DN312_c1_g1;TRINITY_DN373_c0_g1;TRINITY_DN493_c0_g1;TRINITY_DN423_c0_g1;TRINITY_DN569_c7_g1;TRINITY_DN546_c3_g1;TRINITY_DN1012_c0_g1;TRINITY_DN1311_c1_g1;TRINITY_DN1396_c1_g1;TRINITY_DN1582_c0_g1;TRINITY_DN1580_c0_g1;TRINITY_DN1608_c0_g2;TRINITY_DN1728_c0_g2;TRINITY_DN2030…
terminal bouton	cellular_component	GO:0043195	120	TRINITY_DN144_c0_g1;TRINITY_DN124_c0_g1;TRINITY_DN214_c0_g2;TRINITY_DN408_c0_g1;TRINITY_DN501_c3_g1;TRINITY_DN550_c0_g1;TRINITY_DN703_c1_g1;TRINITY_DN783_c2_g1;TRINITY_DN878_c0_g1;TRINITY_DN1153_c1_g1;TRINITY_DN1393_c0_g1;TRINITY_DN1475_c2_g1;TRINITY_DN1535_c0_g1;TRINITY_DN1504_c0_g2;TRINITY_DN1728_c0_g2;TRINITY_DN1814_c0_g1;TRINITY_DN1921_c0_g3;TRINITY_DN2049_c0_g1;TRINITY_DN2123_c1_g2;TRINITY_D…
response to glucose	biological_process	GO:0009749	119	TRINITY_DN70_c0_g2;TRINITY_DN20_c0_g1;TRINITY_DN10_c1_g1;TRINITY_DN31_c1_g1;TRINITY_DN291_c0_g1;TRINITY_DN302_c0_g1;TRINITY_DN359_c0_g1;TRINITY_DN467_c7_g1;TRINITY_DN505_c0_g1;TRINITY_DN665_c6_g1;TRINITY_DN679_c1_g1;TRINITY_DN671_c2_g1;TRINITY_DN747_c0_g1;TRINITY_DN895_c0_g1;TRINITY_DN901_c1_g1;TRINITY_DN1044_c0_g1;TRINITY_DN1070_c2_g3;TRINITY_DN1138_c1_g1;TRINITY_DN1155_c1_g1;TRINITY_DN1425_c0_g…
muscle organ development	biological_process	GO:0007517	119	TRINITY_DN74_c0_g1;TRINITY_DN67_c0_g1;TRINITY_DN205_c2_g1;TRINITY_DN337_c0_g1;TRINITY_DN471_c0_g1;TRINITY_DN585_c1_g2;TRINITY_DN520_c1_g1;TRINITY_DN720_c0_g1;TRINITY_DN885_c0_g2;TRINITY_DN811_c0_g1;TRINITY_DN1067_c0_g1;TRINITY_DN1133_c0_g1;TRINITY_DN1152_c0_g1;TRINITY_DN1323_c0_g1;TRINITY_DN1387_c0_g1;TRINITY_DN1517_c3_g1;TRINITY_DN1636_c0_g2;TRINITY_DN1706_c0_g1;TRINITY_DN1706_c0_g2;TRINITY_DN19…
response to activity	biological_process	GO:0014823	119	TRINITY_DN13_c0_g2;TRINITY_DN125_c2_g1;TRINITY_DN164_c1_g1;TRINITY_DN545_c0_g1;TRINITY_DN760_c4_g1;TRINITY_DN894_c2_g1;TRINITY_DN1070_c2_g3;TRINITY_DN1050_c0_g2;TRINITY_DN1084_c1_g1;TRINITY_DN1166_c0_g1;TRINITY_DN1308_c0_g2;TRINITY_DN1345_c2_g1;TRINITY_DN1443_c0_g1;TRINITY_DN1486_c0_g2;TRINITY_DN1437_c0_g1;TRINITY_DN1691_c3_g1;TRINITY_DN1691_c3_g2;TRINITY_DN1887_c0_g1;TRINITY_DN1881_c0_g1;TRINITY…
protein phosphatase binding	molecular_function	GO:0019903	119	TRINITY_DN196_c0_g2;TRINITY_DN181_c0_g1;TRINITY_DN258_c1_g1;TRINITY_DN367_c3_g1;TRINITY_DN412_c0_g1;TRINITY_DN583_c0_g1;TRINITY_DN684_c0_g1;TRINITY_DN660_c3_g1;TRINITY_DN611_c4_g1;TRINITY_DN728_c2_g1;TRINITY_DN1149_c1_g1;TRINITY_DN1276_c0_g1;TRINITY_DN1287_c3_g1;TRINITY_DN1568_c1_g1;TRINITY_DN1541_c0_g4;TRINITY_DN1670_c2_g1;TRINITY_DN1704_c0_g1;TRINITY_DN1867_c1_g1;TRINITY_DN1840_c0_g1;TRINITY_DN…
hematopoietic progenitor cell differentiation	biological_process	GO:0002244	118	TRINITY_DN0_c1_g1;TRINITY_DN265_c0_g2;TRINITY_DN370_c0_g1;TRINITY_DN498_c0_g1;TRINITY_DN465_c3_g1;TRINITY_DN494_c2_g2;TRINITY_DN512_c0_g2;TRINITY_DN566_c0_g2;TRINITY_DN572_c5_g1;TRINITY_DN675_c4_g1;TRINITY_DN961_c0_g1;TRINITY_DN1022_c2_g1;TRINITY_DN1291_c0_g1;TRINITY_DN1238_c0_g1;TRINITY_DN1334_c0_g1;TRINITY_DN1418_c1_g2;TRINITY_DN1418_c1_g1;TRINITY_DN1541_c0_g2;TRINITY_DN1607_c1_g1;TRINITY_DN173…
calcium channel activity	molecular_function	GO:0005262	118	TRINITY_DN78_c12_g1;TRINITY_DN406_c0_g1;TRINITY_DN494_c2_g2;TRINITY_DN802_c0_g1;TRINITY_DN1458_c0_g1;TRINITY_DN1528_c1_g1;TRINITY_DN1978_c1_g1;TRINITY_DN2015_c2_g1;TRINITY_DN3139_c1_g1;TRINITY_DN3644_c0_g1;TRINITY_DN3656_c1_g1;TRINITY_DN4057_c0_g1;TRINITY_DN4375_c0_g1;TRINITY_DN4588_c3_g1;TRINITY_DN4531_c0_g1;TRINITY_DN5836_c0_g1;TRINITY_DN5880_c0_g2;TRINITY_DN6128_c1_g1;TRINITY_DN6400_c0_g2;TRIN…
ATPase binding	molecular_function	GO:0051117	118	TRINITY_DN62_c2_g1;TRINITY_DN192_c0_g4;TRINITY_DN192_c0_g5;TRINITY_DN372_c2_g1;TRINITY_DN746_c1_g2;TRINITY_DN724_c0_g3;TRINITY_DN775_c0_g1;TRINITY_DN775_c0_g2;TRINITY_DN775_c0_g3;TRINITY_DN914_c1_g1;TRINITY_DN1049_c1_g1;TRINITY_DN1235_c6_g1;TRINITY_DN1238_c1_g1;TRINITY_DN1345_c0_g1;TRINITY_DN1384_c0_g1;TRINITY_DN1522_c0_g1;TRINITY_DN1756_c0_g1;TRINITY_DN1723_c0_g1;TRINITY_DN1723_c0_g2;TRINITY_DN2…
serine-type endopeptidase inhibitor activity	molecular_function	GO:0004867	118	TRINITY_DN140_c1_g3;TRINITY_DN859_c2_g1;TRINITY_DN969_c0_g1;TRINITY_DN969_c0_g3;TRINITY_DN1372_c7_g1;TRINITY_DN1372_c7_g2;TRINITY_DN1597_c0_g1;TRINITY_DN1520_c0_g1;TRINITY_DN1537_c0_g3;TRINITY_DN1654_c0_g1;TRINITY_DN1616_c0_g2;TRINITY_DN1792_c1_g1;TRINITY_DN1706_c0_g1;TRINITY_DN1706_c0_g2;TRINITY_DN1808_c2_g1;TRINITY_DN1898_c0_g1;TRINITY_DN1809_c0_g1;TRINITY_DN1925_c1_g1;TRINITY_DN2024_c1_g1;TRIN…
cellular response to drug	biological_process	GO:0035690	117	TRINITY_DN55_c3_g1;TRINITY_DN1_c0_g1;TRINITY_DN14_c0_g1;TRINITY_DN101_c0_g1;TRINITY_DN251_c0_g1;TRINITY_DN312_c2_g1;TRINITY_DN302_c0_g1;TRINITY_DN320_c0_g1;TRINITY_DN467_c7_g1;TRINITY_DN836_c0_g1;TRINITY_DN884_c0_g1;TRINITY_DN878_c0_g1;TRINITY_DN1070_c2_g3;TRINITY_DN1311_c0_g1;TRINITY_DN1458_c0_g1;TRINITY_DN1437_c0_g1;TRINITY_DN1537_c0_g3;TRINITY_DN1637_c0_g5;TRINITY_DN1687_c0_g1;TRINITY_DN1916_c…
Rho protein signal transduction	biological_process	GO:0007266	117	TRINITY_DN21_c0_g1;TRINITY_DN97_c2_g1;TRINITY_DN22_c0_g5;TRINITY_DN121_c1_g2;TRINITY_DN121_c1_g1;TRINITY_DN178_c0_g2;TRINITY_DN251_c9_g1;TRINITY_DN301_c0_g1;TRINITY_DN416_c0_g1;TRINITY_DN578_c0_g1;TRINITY_DN576_c0_g2;TRINITY_DN609_c0_g1;TRINITY_DN735_c0_g2;TRINITY_DN970_c0_g1;TRINITY_DN1118_c1_g1;TRINITY_DN1267_c1_g2;TRINITY_DN1366_c2_g1;TRINITY_DN1303_c6_g1;TRINITY_DN1364_c0_g1;TRINITY_DN1354_c0…
endocytic vesicle	cellular_component	GO:0030139	117	TRINITY_DN5_c0_g1;TRINITY_DN11_c1_g1;TRINITY_DN108_c2_g1;TRINITY_DN124_c0_g1;TRINITY_DN284_c0_g1;TRINITY_DN297_c0_g1;TRINITY_DN231_c1_g1;TRINITY_DN337_c0_g1;TRINITY_DN337_c0_g2;TRINITY_DN337_c0_g3;TRINITY_DN372_c2_g1;TRINITY_DN514_c0_g4;TRINITY_DN582_c0_g2;TRINITY_DN566_c0_g1;TRINITY_DN612_c0_g1;TRINITY_DN741_c0_g1;TRINITY_DN779_c1_g1;TRINITY_DN1012_c0_g1;TRINITY_DN1285_c0_g2;TRINITY_DN1267_c1_g3…
kinesin complex	cellular_component	GO:0005871	117	TRINITY_DN297_c0_g1;TRINITY_DN596_c1_g1;TRINITY_DN649_c4_g1;TRINITY_DN796_c0_g2;TRINITY_DN796_c0_g3;TRINITY_DN1170_c1_g1;TRINITY_DN1244_c0_g1;TRINITY_DN1413_c0_g1;TRINITY_DN1827_c0_g1;TRINITY_DN1910_c0_g2;TRINITY_DN2038_c0_g4;TRINITY_DN2219_c2_g1;TRINITY_DN2301_c0_g2;TRINITY_DN2346_c3_g1;TRINITY_DN2402_c0_g1;TRINITY_DN2402_c0_g3;TRINITY_DN2451_c4_g1;TRINITY_DN2510_c0_g1;TRINITY_DN2655_c0_g1;TRINI…
heart morphogenesis	biological_process	GO:0003007	116	TRINITY_DN8_c1_g1;TRINITY_DN45_c1_g1;TRINITY_DN76_c0_g1;TRINITY_DN164_c1_g1;TRINITY_DN259_c0_g6;TRINITY_DN269_c0_g1;TRINITY_DN332_c4_g2;TRINITY_DN562_c1_g2;TRINITY_DN665_c1_g1;TRINITY_DN665_c6_g1;TRINITY_DN641_c0_g2;TRINITY_DN808_c0_g1;TRINITY_DN1028_c0_g1;TRINITY_DN1182_c3_g1;TRINITY_DN1323_c0_g1;TRINITY_DN1449_c0_g1;TRINITY_DN1539_c2_g2;TRINITY_DN1539_c2_g1;TRINITY_DN1506_c0_g1;TRINITY_DN1552_c…
potassium ion transmembrane transport	biological_process	GO:0071805	116	TRINITY_DN101_c0_g1;TRINITY_DN234_c1_g1;TRINITY_DN234_c0_g1;TRINITY_DN234_c0_g3;TRINITY_DN217_c1_g1;TRINITY_DN478_c4_g1;TRINITY_DN478_c4_g2;TRINITY_DN739_c0_g5;TRINITY_DN867_c0_g1;TRINITY_DN867_c1_g1;TRINITY_DN1088_c0_g1;TRINITY_DN1204_c2_g1;TRINITY_DN1590_c1_g1;TRINITY_DN1683_c0_g1;TRINITY_DN1970_c1_g1;TRINITY_DN1952_c0_g1;TRINITY_DN2045_c2_g1;TRINITY_DN2653_c0_g1;TRINITY_DN2653_c0_g2;TRINITY_DN…
RNA secondary structure unwinding	biological_process	GO:0010501	115	TRINITY_DN220_c1_g1;TRINITY_DN354_c2_g1;TRINITY_DN426_c0_g1;TRINITY_DN426_c0_g2;TRINITY_DN426_c0_g3;TRINITY_DN654_c1_g1;TRINITY_DN701_c0_g1;TRINITY_DN722_c0_g1;TRINITY_DN789_c0_g1;TRINITY_DN852_c0_g1;TRINITY_DN866_c5_g1;TRINITY_DN990_c4_g1;TRINITY_DN1038_c0_g1;TRINITY_DN1448_c1_g2;TRINITY_DN1448_c1_g1;TRINITY_DN1579_c0_g1;TRINITY_DN1555_c0_g1;TRINITY_DN1536_c3_g1;TRINITY_DN1639_c0_g1;TRINITY_DN16…
kinetochore	cellular_component	GO:0000776	115	TRINITY_DN40_c0_g1;TRINITY_DN1_c0_g1;TRINITY_DN183_c1_g1;TRINITY_DN187_c0_g1;TRINITY_DN233_c0_g1;TRINITY_DN330_c0_g1;TRINITY_DN311_c0_g1;TRINITY_DN320_c0_g1;TRINITY_DN404_c2_g1;TRINITY_DN494_c2_g2;TRINITY_DN482_c1_g2;TRINITY_DN620_c1_g1;TRINITY_DN779_c4_g1;TRINITY_DN808_c0_g1;TRINITY_DN1154_c4_g1;TRINITY_DN1154_c1_g2;TRINITY_DN1239_c1_g1;TRINITY_DN1316_c9_g1;TRINITY_DN1572_c1_g1;TRINITY_DN1684_c0…
activation of MAPK activity	biological_process	GO:0000187	115	TRINITY_DN35_c0_g1;TRINITY_DN25_c0_g1;TRINITY_DN25_c0_g2;TRINITY_DN153_c1_g1;TRINITY_DN164_c1_g1;TRINITY_DN181_c0_g1;TRINITY_DN156_c1_g2;TRINITY_DN217_c0_g3;TRINITY_DN203_c0_g2;TRINITY_DN319_c1_g1;TRINITY_DN351_c1_g1;TRINITY_DN475_c10_g1;TRINITY_DN566_c0_g1;TRINITY_DN611_c4_g1;TRINITY_DN718_c0_g2;TRINITY_DN1044_c0_g1;TRINITY_DN1028_c0_g1;TRINITY_DN1077_c0_g1;TRINITY_DN1005_c1_g1;TRINITY_DN1197_c0…
muscle contraction	biological_process	GO:0006936	115	TRINITY_DN61_c0_g1;TRINITY_DN76_c0_g1;TRINITY_DN259_c5_g1;TRINITY_DN336_c0_g1;TRINITY_DN306_c4_g1;TRINITY_DN467_c0_g1;TRINITY_DN665_c6_g1;TRINITY_DN763_c0_g1;TRINITY_DN1241_c0_g2;TRINITY_DN1448_c0_g1;TRINITY_DN1457_c0_g1;TRINITY_DN1552_c1_g1;TRINITY_DN1683_c0_g1;TRINITY_DN1938_c0_g1;TRINITY_DN2089_c0_g1;TRINITY_DN2330_c0_g1;TRINITY_DN2330_c0_g2;TRINITY_DN2485_c0_g1;TRINITY_DN2689_c0_g1;TRINITY_DN…
actin cytoskeleton reorganization	biological_process	GO:0031532	115	TRINITY_DN25_c0_g1;TRINITY_DN153_c1_g1;TRINITY_DN164_c0_g1;TRINITY_DN164_c0_g2;TRINITY_DN136_c5_g1;TRINITY_DN197_c1_g1;TRINITY_DN293_c0_g1;TRINITY_DN331_c0_g1;TRINITY_DN465_c4_g1;TRINITY_DN492_c1_g2;TRINITY_DN742_c1_g1;TRINITY_DN908_c0_g1;TRINITY_DN1271_c0_g1;TRINITY_DN1425_c0_g1;TRINITY_DN1402_c0_g1;TRINITY_DN1618_c0_g1;TRINITY_DN1843_c0_g1;TRINITY_DN2018_c17_g1;TRINITY_DN2089_c0_g1;TRINITY_DN21…
methylated histone binding	molecular_function	GO:0035064	115	TRINITY_DN85_c5_g1;TRINITY_DN7_c0_g1;TRINITY_DN7_c0_g2;TRINITY_DN145_c2_g1;TRINITY_DN187_c0_g1;TRINITY_DN320_c0_g1;TRINITY_DN529_c0_g1;TRINITY_DN520_c0_g1;TRINITY_DN633_c0_g1;TRINITY_DN661_c1_g1;TRINITY_DN610_c2_g1;TRINITY_DN659_c0_g1;TRINITY_DN731_c0_g1;TRINITY_DN703_c1_g1;TRINITY_DN723_c2_g1;TRINITY_DN872_c2_g1;TRINITY_DN906_c1_g2;TRINITY_DN906_c1_g1;TRINITY_DN1024_c0_g1;TRINITY_DN1213_c0_g1;TR…
cellular response to organic cyclic compound	biological_process	GO:0071407	115	TRINITY_DN21_c0_g1;TRINITY_DN74_c0_g3;TRINITY_DN14_c0_g2;TRINITY_DN189_c1_g1;TRINITY_DN157_c0_g1;TRINITY_DN244_c0_g1;TRINITY_DN265_c0_g1;TRINITY_DN352_c0_g2;TRINITY_DN583_c0_g1;TRINITY_DN770_c0_g1;TRINITY_DN884_c0_g1;TRINITY_DN827_c0_g1;TRINITY_DN950_c0_g1;TRINITY_DN980_c0_g2;TRINITY_DN944_c0_g1;TRINITY_DN944_c0_g2;TRINITY_DN1118_c1_g1;TRINITY_DN1155_c1_g1;TRINITY_DN1374_c0_g1;TRINITY_DN1354_c0_g…
ephrin receptor signaling pathway	biological_process	GO:0048013	115	TRINITY_DN56_c2_g2;TRINITY_DN122_c1_g1;TRINITY_DN252_c0_g2;TRINITY_DN203_c0_g3;TRINITY_DN339_c1_g1;TRINITY_DN512_c0_g1;TRINITY_DN512_c0_g3;TRINITY_DN521_c0_g1;TRINITY_DN573_c0_g2;TRINITY_DN919_c0_g1;TRINITY_DN1197_c0_g1;TRINITY_DN1241_c0_g2;TRINITY_DN1312_c0_g1;TRINITY_DN1342_c1_g1;TRINITY_DN1490_c1_g1;TRINITY_DN1541_c0_g1;TRINITY_DN1611_c1_g2;TRINITY_DN1611_c1_g1;TRINITY_DN1770_c0_g1;TRINITY_DN1…
rRNA binding	molecular_function	GO:0019843	115	TRINITY_DN0_c5_g1;TRINITY_DN125_c0_g1;TRINITY_DN317_c0_g1;TRINITY_DN525_c0_g1;TRINITY_DN1047_c0_g1;TRINITY_DN1171_c2_g1;TRINITY_DN1260_c1_g2;TRINITY_DN1433_c0_g2;TRINITY_DN1605_c0_g3;TRINITY_DN1734_c1_g1;TRINITY_DN1734_c0_g1;TRINITY_DN2382_c2_g1;TRINITY_DN2376_c0_g1;TRINITY_DN2432_c0_g1;TRINITY_DN2572_c0_g1;TRINITY_DN2774_c0_g2;TRINITY_DN2993_c1_g1;TRINITY_DN3078_c1_g2;TRINITY_DN3078_c1_g1;TRINIT…
signal transduction by protein phosphorylation	biological_process	GO:0023014	115	TRINITY_DN21_c0_g1;TRINITY_DN164_c1_g1;TRINITY_DN115_c0_g1;TRINITY_DN395_c1_g1;TRINITY_DN333_c0_g1;TRINITY_DN483_c0_g1;TRINITY_DN513_c0_g1;TRINITY_DN764_c1_g1;TRINITY_DN798_c5_g1;TRINITY_DN842_c0_g1;TRINITY_DN966_c1_g1;TRINITY_DN1118_c1_g1;TRINITY_DN1153_c2_g2;TRINITY_DN1200_c0_g1;TRINITY_DN1490_c1_g1;TRINITY_DN1506_c4_g1;TRINITY_DN2090_c0_g1;TRINITY_DN2018_c17_g1;TRINITY_DN2220_c1_g2;TRINITY_DN2…
acrosomal vesicle	cellular_component	GO:0001669	114	TRINITY_DN32_c0_g1;TRINITY_DN195_c0_g1;TRINITY_DN293_c0_g1;TRINITY_DN319_c1_g1;TRINITY_DN545_c0_g1;TRINITY_DN664_c0_g1;TRINITY_DN705_c0_g1;TRINITY_DN785_c1_g3;TRINITY_DN785_c1_g1;TRINITY_DN951_c0_g1;TRINITY_DN993_c1_g1;TRINITY_DN983_c1_g1;TRINITY_DN1162_c0_g1;TRINITY_DN1101_c0_g1;TRINITY_DN1235_c6_g1;TRINITY_DN1345_c1_g1;TRINITY_DN1352_c2_g1;TRINITY_DN1652_c0_g3;TRINITY_DN1761_c0_g1;TRINITY_DN172…
spermatid development	biological_process	GO:0007286	114	TRINITY_DN149_c0_g1;TRINITY_DN149_c0_g2;TRINITY_DN275_c1_g2;TRINITY_DN312_c2_g1;TRINITY_DN322_c7_g1;TRINITY_DN452_c0_g1;TRINITY_DN403_c0_g1;TRINITY_DN471_c0_g1;TRINITY_DN420_c0_g1;TRINITY_DN414_c1_g1;TRINITY_DN664_c0_g1;TRINITY_DN849_c3_g1;TRINITY_DN993_c1_g1;TRINITY_DN1088_c1_g1;TRINITY_DN1162_c0_g1;TRINITY_DN1376_c0_g1;TRINITY_DN1498_c6_g1;TRINITY_DN1731_c0_g1;TRINITY_DN1770_c2_g1;TRINITY_DN207…
memory	biological_process	GO:0007613	114	TRINITY_DN176_c2_g2;TRINITY_DN176_c2_g1;TRINITY_DN271_c0_g3;TRINITY_DN265_c0_g1;TRINITY_DN231_c0_g1;TRINITY_DN233_c0_g1;TRINITY_DN314_c1_g1;TRINITY_DN372_c1_g1;TRINITY_DN481_c3_g1;TRINITY_DN481_c1_g4;TRINITY_DN494_c2_g2;TRINITY_DN459_c0_g1;TRINITY_DN502_c0_g1;TRINITY_DN734_c0_g1;TRINITY_DN1482_c2_g1;TRINITY_DN1455_c2_g1;TRINITY_DN1676_c0_g1;TRINITY_DN1777_c3_g5;TRINITY_DN1973_c0_g1;TRINITY_DN2112…
negative regulation of neuron differentiation	biological_process	GO:0045665	114	TRINITY_DN125_c2_g1;TRINITY_DN195_c0_g1;TRINITY_DN178_c1_g1;TRINITY_DN503_c1_g2;TRINITY_DN545_c0_g1;TRINITY_DN619_c1_g1;TRINITY_DN971_c1_g2;TRINITY_DN971_c1_g1;TRINITY_DN1093_c0_g1;TRINITY_DN1093_c0_g2;TRINITY_DN1535_c1_g1;TRINITY_DN1544_c1_g1;TRINITY_DN1828_c4_g2;TRINITY_DN1827_c3_g1;TRINITY_DN1807_c0_g1;TRINITY_DN1907_c0_g1;TRINITY_DN2001_c0_g1;TRINITY_DN2029_c2_g2;TRINITY_DN2298_c0_g1;TRINITY_…
regulation of cell growth	biological_process	GO:0001558	114	TRINITY_DN184_c2_g1;TRINITY_DN152_c0_g2;TRINITY_DN152_c0_g3;TRINITY_DN121_c0_g1;TRINITY_DN283_c0_g1;TRINITY_DN352_c4_g1;TRINITY_DN452_c0_g1;TRINITY_DN416_c0_g1;TRINITY_DN427_c0_g1;TRINITY_DN527_c0_g1;TRINITY_DN527_c0_g2;TRINITY_DN631_c0_g1;TRINITY_DN725_c0_g2;TRINITY_DN829_c2_g2;TRINITY_DN942_c3_g2;TRINITY_DN1177_c0_g2;TRINITY_DN1156_c2_g1;TRINITY_DN1347_c5_g1;TRINITY_DN1543_c0_g1;TRINITY_DN1622_…
negative regulation of angiogenesis	biological_process	GO:0016525	114	TRINITY_DN75_c1_g2;TRINITY_DN165_c1_g4;TRINITY_DN205_c1_g1;TRINITY_DN393_c0_g1;TRINITY_DN405_c1_g1;TRINITY_DN458_c0_g1;TRINITY_DN612_c0_g1;TRINITY_DN785_c2_g1;TRINITY_DN921_c0_g2;TRINITY_DN983_c0_g1;TRINITY_DN1044_c0_g1;TRINITY_DN1342_c1_g1;TRINITY_DN1447_c2_g1;TRINITY_DN1434_c0_g2;TRINITY_DN1617_c7_g1;TRINITY_DN1625_c0_g4;TRINITY_DN1625_c0_g1;TRINITY_DN1871_c0_g1;TRINITY_DN1955_c0_g1;TRINITY_DN2…
retrograde transport, endosome to Golgi	biological_process	GO:0042147	113	TRINITY_DN1_c1_g1;TRINITY_DN133_c1_g1;TRINITY_DN121_c0_g1;TRINITY_DN135_c0_g1;TRINITY_DN211_c0_g1;TRINITY_DN360_c0_g1;TRINITY_DN319_c1_g1;TRINITY_DN546_c3_g1;TRINITY_DN681_c0_g1;TRINITY_DN621_c0_g1;TRINITY_DN823_c1_g1;TRINITY_DN838_c0_g1;TRINITY_DN828_c1_g1;TRINITY_DN942_c0_g1;TRINITY_DN1186_c3_g1;TRINITY_DN1287_c3_g3;TRINITY_DN1328_c4_g1;TRINITY_DN1305_c0_g2;TRINITY_DN1455_c0_g1;TRINITY_DN1700_c…
BMP signaling pathway	biological_process	GO:0030509	113	TRINITY_DN89_c0_g2;TRINITY_DN11_c0_g1;TRINITY_DN14_c0_g1;TRINITY_DN244_c0_g1;TRINITY_DN319_c0_g1;TRINITY_DN498_c0_g1;TRINITY_DN482_c1_g4;TRINITY_DN422_c0_g1;TRINITY_DN422_c0_g2;TRINITY_DN422_c0_g3;TRINITY_DN512_c0_g2;TRINITY_DN594_c2_g1;TRINITY_DN675_c4_g1;TRINITY_DN901_c3_g1;TRINITY_DN997_c0_g3;TRINITY_DN1052_c8_g1;TRINITY_DN1068_c1_g2;TRINITY_DN1030_c0_g1;TRINITY_DN1179_c0_g1;TRINITY_DN1389_c0_…
bone development	biological_process	GO:0060348	113	TRINITY_DN146_c0_g1;TRINITY_DN136_c1_g1;TRINITY_DN244_c0_g1;TRINITY_DN389_c0_g1;TRINITY_DN682_c2_g1;TRINITY_DN641_c0_g2;TRINITY_DN783_c2_g1;TRINITY_DN1041_c1_g1;TRINITY_DN1206_c0_g1;TRINITY_DN1320_c0_g3;TRINITY_DN1769_c0_g1;TRINITY_DN1936_c1_g1;TRINITY_DN1901_c2_g2;TRINITY_DN2086_c1_g1;TRINITY_DN2064_c0_g1;TRINITY_DN2011_c1_g1;TRINITY_DN2158_c0_g1;TRINITY_DN2158_c0_g2;TRINITY_DN2644_c0_g1;TRINITY…
SH3 domain binding	molecular_function	GO:0017124	113	TRINITY_DN189_c1_g1;TRINITY_DN108_c0_g1;TRINITY_DN108_c2_g1;TRINITY_DN249_c0_g1;TRINITY_DN268_c0_g1;TRINITY_DN231_c0_g1;TRINITY_DN365_c0_g1;TRINITY_DN447_c0_g2;TRINITY_DN558_c5_g1;TRINITY_DN588_c0_g1;TRINITY_DN572_c1_g1;TRINITY_DN612_c0_g1;TRINITY_DN705_c0_g1;TRINITY_DN1056_c0_g1;TRINITY_DN1346_c1_g1;TRINITY_DN1349_c0_g2;TRINITY_DN1593_c0_g1;TRINITY_DN1719_c1_g2;TRINITY_DN1719_c1_g4;TRINITY_DN183…
epithelial cell differentiation	biological_process	GO:0030855	112	TRINITY_DN123_c0_g1;TRINITY_DN240_c0_g1;TRINITY_DN291_c0_g1;TRINITY_DN480_c0_g1;TRINITY_DN462_c1_g1;TRINITY_DN560_c2_g1;TRINITY_DN638_c1_g1;TRINITY_DN860_c0_g1;TRINITY_DN885_c2_g1;TRINITY_DN834_c0_g2;TRINITY_DN921_c0_g2;TRINITY_DN1345_c0_g1;TRINITY_DN1387_c0_g1;TRINITY_DN1474_c0_g1;TRINITY_DN1474_c0_g2;TRINITY_DN1459_c1_g1;TRINITY_DN1459_c0_g2;TRINITY_DN1529_c0_g1;TRINITY_DN1666_c0_g1;TRINITY_DN1…
negative regulation of transforming growth factor beta receptor signaling pathway	biological_process	GO:0030512	112	TRINITY_DN29_c0_g2;TRINITY_DN109_c1_g1;TRINITY_DN156_c1_g2;TRINITY_DN480_c0_g1;TRINITY_DN447_c0_g2;TRINITY_DN422_c0_g1;TRINITY_DN638_c0_g1;TRINITY_DN641_c1_g1;TRINITY_DN779_c2_g1;TRINITY_DN823_c1_g1;TRINITY_DN1084_c1_g1;TRINITY_DN1102_c0_g2;TRINITY_DN1179_c0_g1;TRINITY_DN1226_c0_g1;TRINITY_DN1351_c5_g1;TRINITY_DN1351_c5_g2;TRINITY_DN1781_c0_g1;TRINITY_DN2185_c2_g1;TRINITY_DN2240_c4_g1;TRINITY_DN2…
chaperone binding	molecular_function	GO:0051087	112	TRINITY_DN52_c0_g1;TRINITY_DN65_c2_g1;TRINITY_DN271_c0_g1;TRINITY_DN271_c0_g3;TRINITY_DN307_c0_g1;TRINITY_DN307_c0_g2;TRINITY_DN381_c3_g1;TRINITY_DN428_c3_g1;TRINITY_DN653_c1_g2;TRINITY_DN761_c0_g1;TRINITY_DN836_c0_g1;TRINITY_DN805_c0_g4;TRINITY_DN805_c0_g1;TRINITY_DN882_c0_g1;TRINITY_DN1272_c7_g1;TRINITY_DN1442_c0_g1;TRINITY_DN1526_c0_g1;TRINITY_DN1575_c1_g1;TRINITY_DN1531_c0_g1;TRINITY_DN1549_c…
kinase binding	molecular_function	GO:0019900	112	TRINITY_DN20_c0_g1;TRINITY_DN20_c0_g2;TRINITY_DN49_c2_g1;TRINITY_DN96_c0_g1;TRINITY_DN111_c12_g1;TRINITY_DN157_c1_g1;TRINITY_DN297_c8_g1;TRINITY_DN265_c0_g1;TRINITY_DN217_c1_g1;TRINITY_DN331_c0_g1;TRINITY_DN412_c0_g1;TRINITY_DN494_c0_g2;TRINITY_DN492_c1_g2;TRINITY_DN521_c0_g1;TRINITY_DN545_c0_g1;TRINITY_DN612_c0_g1;TRINITY_DN854_c0_g2;TRINITY_DN834_c1_g1;TRINITY_DN834_c0_g1;TRINITY_DN1194_c0_g2;T…
negative regulation of cysteine-type endopeptidase activity involved in apoptotic process	biological_process	GO:0043154	112	TRINITY_DN264_c0_g1;TRINITY_DN354_c6_g1;TRINITY_DN412_c0_g1;TRINITY_DN520_c3_g1;TRINITY_DN588_c0_g1;TRINITY_DN572_c6_g1;TRINITY_DN613_c0_g1;TRINITY_DN613_c0_g3;TRINITY_DN619_c0_g1;TRINITY_DN805_c0_g4;TRINITY_DN805_c0_g1;TRINITY_DN944_c0_g1;TRINITY_DN944_c0_g2;TRINITY_DN1044_c0_g1;TRINITY_DN1116_c1_g1;TRINITY_DN1112_c1_g1;TRINITY_DN1242_c0_g1;TRINITY_DN1328_c0_g1;TRINITY_DN1323_c0_g2;TRINITY_DN144…
neuron projection morphogenesis	biological_process	GO:0048812	112	TRINITY_DN46_c0_g3;TRINITY_DN191_c0_g2;TRINITY_DN205_c2_g1;TRINITY_DN217_c0_g3;TRINITY_DN281_c1_g1;TRINITY_DN283_c0_g1;TRINITY_DN365_c0_g1;TRINITY_DN425_c0_g1;TRINITY_DN425_c0_g2;TRINITY_DN447_c0_g2;TRINITY_DN519_c0_g1;TRINITY_DN527_c0_g1;TRINITY_DN527_c0_g2;TRINITY_DN509_c3_g2;TRINITY_DN695_c3_g1;TRINITY_DN612_c0_g1;TRINITY_DN703_c1_g1;TRINITY_DN1026_c0_g1;TRINITY_DN1086_c0_g1;TRINITY_DN1086_c0_…
primary cilium	cellular_component	GO:0072372	112	TRINITY_DN21_c3_g1;TRINITY_DN8_c1_g1;TRINITY_DN302_c0_g1;TRINITY_DN389_c0_g1;TRINITY_DN504_c1_g3;TRINITY_DN504_c1_g1;TRINITY_DN793_c0_g1;TRINITY_DN744_c0_g1;TRINITY_DN844_c0_g1;TRINITY_DN802_c0_g1;TRINITY_DN941_c0_g1;TRINITY_DN1003_c1_g1;TRINITY_DN1320_c0_g3;TRINITY_DN1376_c0_g1;TRINITY_DN1467_c2_g1;TRINITY_DN1554_c1_g1;TRINITY_DN1765_c0_g1;TRINITY_DN1855_c0_g1;TRINITY_DN1855_c0_g2;TRINITY_DN1828…
protein heterooligomerization	biological_process	GO:0051291	111	TRINITY_DN111_c2_g1;TRINITY_DN101_c1_g1;TRINITY_DN101_c0_g1;TRINITY_DN157_c1_g1;TRINITY_DN203_c0_g3;TRINITY_DN264_c2_g2;TRINITY_DN306_c1_g1;TRINITY_DN452_c0_g1;TRINITY_DN703_c1_g1;TRINITY_DN740_c0_g1;TRINITY_DN871_c1_g1;TRINITY_DN802_c0_g1;TRINITY_DN937_c0_g1;TRINITY_DN1216_c0_g1;TRINITY_DN1204_c1_g1;TRINITY_DN1481_c0_g2;TRINITY_DN1575_c1_g1;TRINITY_DN1658_c1_g1;TRINITY_DN1647_c3_g1;TRINITY_DN168…
regulation of actin cytoskeleton organization	biological_process	GO:0032956	111	TRINITY_DN65_c0_g1;TRINITY_DN65_c0_g2;TRINITY_DN65_c0_g3;TRINITY_DN98_c1_g1;TRINITY_DN301_c0_g1;TRINITY_DN451_c2_g3;TRINITY_DN576_c0_g2;TRINITY_DN645_c0_g1;TRINITY_DN645_c0_g2;TRINITY_DN600_c0_g1;TRINITY_DN703_c1_g1;TRINITY_DN1289_c0_g1;TRINITY_DN1283_c3_g2;TRINITY_DN1311_c1_g1;TRINITY_DN1342_c1_g1;TRINITY_DN1490_c1_g1;TRINITY_DN1535_c1_g1;TRINITY_DN1523_c0_g1;TRINITY_DN1575_c1_g1;TRINITY_DN1541_…
mRNA export from nucleus	biological_process	GO:0006406	110	TRINITY_DN14_c0_g1;TRINITY_DN125_c0_g1;TRINITY_DN408_c0_g1;TRINITY_DN435_c0_g1;TRINITY_DN453_c0_g2;TRINITY_DN482_c1_g2;TRINITY_DN572_c0_g1;TRINITY_DN623_c3_g2;TRINITY_DN648_c0_g1;TRINITY_DN872_c0_g1;TRINITY_DN990_c4_g1;TRINITY_DN954_c0_g1;TRINITY_DN1130_c0_g2;TRINITY_DN1316_c2_g1;TRINITY_DN1743_c1_g3;TRINITY_DN1948_c0_g1;TRINITY_DN1905_c0_g1;TRINITY_DN2173_c0_g1;TRINITY_DN2270_c0_g1;TRINITY_DN253…
protein autoubiquitination	biological_process	GO:0051865	110	TRINITY_DN21_c2_g1;TRINITY_DN257_c1_g1;TRINITY_DN346_c1_g1;TRINITY_DN520_c3_g3;TRINITY_DN649_c0_g2;TRINITY_DN615_c1_g1;TRINITY_DN653_c1_g2;TRINITY_DN825_c1_g1;TRINITY_DN901_c3_g1;TRINITY_DN901_c3_g3;TRINITY_DN901_c3_g2;TRINITY_DN1047_c0_g1;TRINITY_DN1264_c0_g3;TRINITY_DN1205_c3_g1;TRINITY_DN1309_c0_g1;TRINITY_DN1302_c1_g1;TRINITY_DN1657_c0_g1;TRINITY_DN1670_c1_g1;TRINITY_DN1670_c0_g1;TRINITY_DN17…
substrate adhesion-dependent cell spreading	biological_process	GO:0034446	110	TRINITY_DN72_c0_g1;TRINITY_DN72_c0_g2;TRINITY_DN136_c5_g1;TRINITY_DN259_c1_g1;TRINITY_DN240_c0_g1;TRINITY_DN221_c0_g1;TRINITY_DN483_c0_g1;TRINITY_DN471_c0_g1;TRINITY_DN546_c3_g1;TRINITY_DN509_c3_g2;TRINITY_DN592_c0_g1;TRINITY_DN703_c1_g1;TRINITY_DN742_c1_g1;TRINITY_DN1016_c2_g1;TRINITY_DN1272_c7_g2;TRINITY_DN1611_c1_g1;TRINITY_DN1677_c0_g1;TRINITY_DN1812_c2_g2;TRINITY_DN1812_c2_g1;TRINITY_DN2086_…
ER-associated ubiquitin-dependent protein catabolic process	biological_process	GO:0030433	110	TRINITY_DN139_c0_g1;TRINITY_DN206_c0_g1;TRINITY_DN267_c2_g4;TRINITY_DN378_c0_g1;TRINITY_DN381_c3_g1;TRINITY_DN478_c12_g1;TRINITY_DN462_c5_g1;TRINITY_DN615_c0_g1;TRINITY_DN653_c1_g2;TRINITY_DN971_c0_g1;TRINITY_DN1228_c9_g1;TRINITY_DN1201_c0_g1;TRINITY_DN1327_c0_g1;TRINITY_DN1376_c1_g1;TRINITY_DN1538_c0_g2;TRINITY_DN1668_c0_g1;TRINITY_DN1623_c0_g1;TRINITY_DN1833_c2_g1;TRINITY_DN1850_c0_g1;TRINITY_D…
fatty acid metabolic process	biological_process	GO:0006631	110	TRINITY_DN324_c0_g1;TRINITY_DN583_c0_g1;TRINITY_DN665_c3_g1;TRINITY_DN847_c0_g1;TRINITY_DN986_c0_g1;TRINITY_DN986_c0_g3;TRINITY_DN1023_c0_g2;TRINITY_DN1138_c1_g1;TRINITY_DN1131_c0_g1;TRINITY_DN1375_c1_g1;TRINITY_DN1465_c1_g1;TRINITY_DN1553_c0_g1;TRINITY_DN1735_c2_g1;TRINITY_DN1905_c2_g1;TRINITY_DN2612_c0_g1;TRINITY_DN2612_c0_g2;TRINITY_DN2950_c0_g1;TRINITY_DN3262_c0_g1;TRINITY_DN3668_c0_g1;TRINIT…
cellular response to mechanical stimulus	biological_process	GO:0071260	110	TRINITY_DN11_c0_g1;TRINITY_DN189_c1_g1;TRINITY_DN271_c0_g1;TRINITY_DN291_c0_g1;TRINITY_DN329_c0_g1;TRINITY_DN314_c1_g1;TRINITY_DN333_c0_g1;TRINITY_DN379_c2_g2;TRINITY_DN545_c0_g1;TRINITY_DN624_c2_g2;TRINITY_DN770_c0_g1;TRINITY_DN798_c5_g1;TRINITY_DN899_c0_g1;TRINITY_DN819_c2_g1;TRINITY_DN944_c0_g1;TRINITY_DN1108_c0_g1;TRINITY_DN1204_c1_g1;TRINITY_DN1354_c0_g1;TRINITY_DN1458_c0_g1;TRINITY_DN1473_c…
chromosome, centromeric region	cellular_component	GO:0000775	109	TRINITY_DN31_c0_g1;TRINITY_DN186_c8_g1;TRINITY_DN352_c3_g1;TRINITY_DN387_c2_g1;TRINITY_DN358_c0_g1;TRINITY_DN779_c4_g1;TRINITY_DN849_c2_g1;TRINITY_DN819_c0_g1;TRINITY_DN999_c0_g2;TRINITY_DN918_c0_g1;TRINITY_DN1193_c1_g1;TRINITY_DN1154_c4_g1;TRINITY_DN1154_c1_g2;TRINITY_DN1371_c0_g2;TRINITY_DN1498_c7_g1;TRINITY_DN1684_c0_g2;TRINITY_DN1827_c4_g1;TRINITY_DN2224_c1_g1;TRINITY_DN2248_c0_g1;TRINITY_DN2…
aromatase activity	molecular_function	GO:0070330	109	TRINITY_DN452_c1_g1;TRINITY_DN663_c2_g1;TRINITY_DN663_c6_g1;TRINITY_DN636_c1_g2;TRINITY_DN636_c1_g1;TRINITY_DN783_c2_g1;TRINITY_DN813_c0_g1;TRINITY_DN935_c2_g1;TRINITY_DN1215_c4_g1;TRINITY_DN1215_c1_g1;TRINITY_DN1215_c0_g1;TRINITY_DN2524_c0_g1;TRINITY_DN2524_c0_g3;TRINITY_DN2524_c1_g3;TRINITY_DN2524_c1_g2;TRINITY_DN3385_c2_g2;TRINITY_DN3367_c2_g1;TRINITY_DN3643_c2_g1;TRINITY_DN3676_c0_g1;TRINITY_…
protein K48-linked ubiquitination	biological_process	GO:0070936	109	TRINITY_DN45_c0_g1;TRINITY_DN133_c1_g1;TRINITY_DN338_c3_g1;TRINITY_DN571_c0_g1;TRINITY_DN520_c3_g3;TRINITY_DN534_c1_g1;TRINITY_DN660_c6_g2;TRINITY_DN660_c6_g1;TRINITY_DN653_c1_g2;TRINITY_DN764_c0_g1;TRINITY_DN901_c3_g1;TRINITY_DN901_c3_g3;TRINITY_DN901_c3_g2;TRINITY_DN1084_c1_g1;TRINITY_DN1171_c3_g1;TRINITY_DN1117_c7_g1;TRINITY_DN1264_c0_g3;TRINITY_DN1539_c0_g2;TRINITY_DN1568_c0_g1;TRINITY_DN1568…
positive regulation of protein ubiquitination	biological_process	GO:0031398	109	TRINITY_DN86_c3_g2;TRINITY_DN1_c3_g1;TRINITY_DN1_c3_g2;TRINITY_DN76_c0_g1;TRINITY_DN109_c1_g1;TRINITY_DN264_c2_g2;TRINITY_DN381_c3_g1;TRINITY_DN362_c0_g1;TRINITY_DN582_c3_g1;TRINITY_DN520_c3_g3;TRINITY_DN572_c6_g1;TRINITY_DN660_c6_g2;TRINITY_DN660_c6_g1;TRINITY_DN709_c1_g1;TRINITY_DN756_c0_g2;TRINITY_DN1112_c1_g1;TRINITY_DN1123_c1_g1;TRINITY_DN1217_c1_g1;TRINITY_DN1535_c0_g1;TRINITY_DN1546_c0_g1;…
protein import into nucleus	biological_process	GO:0006606	109	TRINITY_DN10_c3_g1;TRINITY_DN125_c0_g1;TRINITY_DN330_c0_g1;TRINITY_DN508_c2_g1;TRINITY_DN802_c0_g1;TRINITY_DN875_c0_g1;TRINITY_DN875_c0_g2;TRINITY_DN942_c2_g1;TRINITY_DN1285_c3_g1;TRINITY_DN1311_c0_g1;TRINITY_DN1478_c0_g1;TRINITY_DN1608_c0_g2;TRINITY_DN1660_c0_g1;TRINITY_DN1758_c1_g1;TRINITY_DN1747_c0_g1;TRINITY_DN1831_c0_g1;TRINITY_DN1856_c0_g1;TRINITY_DN2013_c0_g1;TRINITY_DN2291_c0_g3;TRINITY_D…
NADP binding	molecular_function	GO:0050661	109	TRINITY_DN236_c0_g1;TRINITY_DN1287_c1_g2;TRINITY_DN2014_c0_g1;TRINITY_DN2246_c1_g1;TRINITY_DN2555_c2_g3;TRINITY_DN2648_c1_g2;TRINITY_DN3693_c2_g1;TRINITY_DN3638_c2_g2;TRINITY_DN3638_c2_g3;TRINITY_DN3878_c2_g1;TRINITY_DN4661_c0_g2;TRINITY_DN4697_c0_g1;TRINITY_DN4906_c0_g2;TRINITY_DN5239_c0_g1;TRINITY_DN5408_c1_g1;TRINITY_DN5661_c1_g1;TRINITY_DN6270_c0_g1;TRINITY_DN7206_c3_g1;TRINITY_DN7251_c0_g1;T…
ubiquitin binding	molecular_function	GO:0043130	109	TRINITY_DN49_c4_g1;TRINITY_DN227_c0_g1;TRINITY_DN304_c0_g1;TRINITY_DN356_c0_g2;TRINITY_DN503_c0_g1;TRINITY_DN801_c0_g1;TRINITY_DN872_c3_g1;TRINITY_DN1102_c0_g2;TRINITY_DN1206_c1_g1;TRINITY_DN1250_c0_g1;TRINITY_DN1232_c0_g1;TRINITY_DN1201_c0_g1;TRINITY_DN1324_c0_g1;TRINITY_DN1435_c1_g1;TRINITY_DN1596_c0_g1;TRINITY_DN1865_c0_g1;TRINITY_DN1857_c1_g1;TRINITY_DN1962_c1_g1;TRINITY_DN2066_c0_g1;TRINITY_…
negative regulation of NF-kappaB transcription factor activity	biological_process	GO:0032088	108	TRINITY_DN49_c1_g1;TRINITY_DN577_c0_g1;TRINITY_DN520_c3_g1;TRINITY_DN572_c6_g1;TRINITY_DN612_c0_g1;TRINITY_DN825_c1_g1;TRINITY_DN854_c0_g2;TRINITY_DN1160_c0_g2;TRINITY_DN1363_c0_g2;TRINITY_DN1546_c0_g1;TRINITY_DN1624_c0_g1;TRINITY_DN1650_c0_g1;TRINITY_DN1724_c0_g1;TRINITY_DN1710_c0_g1;TRINITY_DN1968_c3_g1;TRINITY_DN2066_c0_g1;TRINITY_DN2061_c1_g1;TRINITY_DN2143_c5_g1;TRINITY_DN2236_c0_g1;TRINITY_…
cellular response to growth factor stimulus	biological_process	GO:0071363	108	TRINITY_DN25_c0_g1;TRINITY_DN184_c2_g1;TRINITY_DN164_c1_g1;TRINITY_DN202_c0_g1;TRINITY_DN240_c0_g1;TRINITY_DN277_c0_g2;TRINITY_DN362_c0_g1;TRINITY_DN477_c0_g3;TRINITY_DN583_c0_g1;TRINITY_DN520_c3_g1;TRINITY_DN825_c0_g2;TRINITY_DN944_c0_g1;TRINITY_DN1289_c0_g1;TRINITY_DN1283_c3_g2;TRINITY_DN1323_c0_g2;TRINITY_DN1558_c0_g1;TRINITY_DN1558_c0_g2;TRINITY_DN1537_c0_g3;TRINITY_DN1527_c1_g1;TRINITY_DN179…
cerebral cortex development	biological_process	GO:0021987	108	TRINITY_DN98_c1_g1;TRINITY_DN29_c5_g1;TRINITY_DN411_c6_g1;TRINITY_DN1240_c5_g1;TRINITY_DN1311_c1_g1;TRINITY_DN1308_c0_g2;TRINITY_DN1575_c1_g1;TRINITY_DN1532_c0_g1;TRINITY_DN1670_c2_g1;TRINITY_DN2136_c0_g1;TRINITY_DN2244_c3_g2;TRINITY_DN2226_c1_g3;TRINITY_DN2262_c1_g1;TRINITY_DN2348_c0_g1;TRINITY_DN2443_c0_g1;TRINITY_DN2679_c1_g1;TRINITY_DN2948_c0_g1;TRINITY_DN2984_c0_g1;TRINITY_DN2984_c0_g2;TRINI…
myosin complex	cellular_component	GO:0016459	108	TRINITY_DN121_c1_g2;TRINITY_DN121_c1_g1;TRINITY_DN697_c0_g1;TRINITY_DN648_c3_g1;TRINITY_DN648_c3_g2;TRINITY_DN1184_c0_g1;TRINITY_DN1273_c2_g1;TRINITY_DN1241_c0_g2;TRINITY_DN1347_c1_g1;TRINITY_DN1740_c1_g1;TRINITY_DN1893_c0_g5;TRINITY_DN1893_c0_g6;TRINITY_DN1893_c0_g1;TRINITY_DN1996_c6_g1;TRINITY_DN2089_c0_g1;TRINITY_DN2089_c2_g1;TRINITY_DN2089_c16_g1;TRINITY_DN2137_c0_g1;TRINITY_DN2137_c0_g2;TRIN…
regulation of protein stability	biological_process	GO:0031647	108	TRINITY_DN55_c3_g1;TRINITY_DN139_c0_g1;TRINITY_DN329_c0_g1;TRINITY_DN410_c0_g1;TRINITY_DN436_c0_g1;TRINITY_DN510_c0_g2;TRINITY_DN596_c3_g1;TRINITY_DN548_c5_g2;TRINITY_DN708_c1_g1;TRINITY_DN764_c3_g1;TRINITY_DN744_c0_g1;TRINITY_DN845_c0_g1;TRINITY_DN872_c3_g1;TRINITY_DN1012_c0_g1;TRINITY_DN1211_c0_g1;TRINITY_DN1569_c0_g1;TRINITY_DN1659_c3_g1;TRINITY_DN1635_c0_g1;TRINITY_DN1636_c0_g2;TRINITY_DN1777…
ligand-dependent nuclear receptor transcription coactivator activity	molecular_function	GO:0030374	108	TRINITY_DN62_c0_g1;TRINITY_DN76_c0_g2;TRINITY_DN151_c6_g1;TRINITY_DN178_c1_g1;TRINITY_DN269_c0_g1;TRINITY_DN241_c0_g1;TRINITY_DN316_c0_g1;TRINITY_DN491_c3_g2;TRINITY_DN428_c2_g1;TRINITY_DN626_c0_g1;TRINITY_DN680_c1_g1;TRINITY_DN766_c0_g4;TRINITY_DN766_c0_g1;TRINITY_DN901_c8_g1;TRINITY_DN948_c0_g1;TRINITY_DN903_c0_g1;TRINITY_DN1235_c0_g1;TRINITY_DN1449_c0_g1;TRINITY_DN1449_c0_g2;TRINITY_DN1453_c0_…
sodium ion transmembrane transport	biological_process	GO:0035725	108	TRINITY_DN62_c2_g1;TRINITY_DN63_c0_g1;TRINITY_DN420_c2_g1;TRINITY_DN665_c6_g1;TRINITY_DN1080_c2_g1;TRINITY_DN1231_c0_g2;TRINITY_DN1382_c2_g1;TRINITY_DN1517_c3_g1;TRINITY_DN1872_c1_g2;TRINITY_DN2003_c0_g1;TRINITY_DN2018_c6_g2;TRINITY_DN2035_c0_g1;TRINITY_DN2127_c0_g1;TRINITY_DN2628_c0_g1;TRINITY_DN2724_c1_g1;TRINITY_DN2825_c0_g2;TRINITY_DN2863_c0_g1;TRINITY_DN3656_c1_g1;TRINITY_DN4680_c0_g1;TRINIT…
negative regulation of protein binding	biological_process	GO:0032091	107	TRINITY_DN183_c1_g1;TRINITY_DN373_c0_g1;TRINITY_DN491_c3_g2;TRINITY_DN543_c1_g1;TRINITY_DN634_c1_g1;TRINITY_DN834_c1_g1;TRINITY_DN903_c0_g1;TRINITY_DN965_c0_g1;TRINITY_DN1217_c1_g1;TRINITY_DN1251_c1_g1;TRINITY_DN1308_c0_g2;TRINITY_DN1361_c0_g1;TRINITY_DN1472_c0_g2;TRINITY_DN1516_c0_g1;TRINITY_DN1569_c0_g1;TRINITY_DN1520_c0_g1;TRINITY_DN1654_c0_g1;TRINITY_DN1719_c0_g1;TRINITY_DN1781_c0_g1;TRINITY_…
sperm motility	biological_process	GO:0030317	107	TRINITY_DN410_c0_g1;TRINITY_DN410_c0_g2;TRINITY_DN496_c0_g1;TRINITY_DN498_c1_g1;TRINITY_DN414_c1_g1;TRINITY_DN428_c3_g1;TRINITY_DN638_c1_g1;TRINITY_DN789_c0_g1;TRINITY_DN1498_c6_g1;TRINITY_DN1622_c0_g1;TRINITY_DN1685_c0_g1;TRINITY_DN1652_c0_g2;TRINITY_DN1705_c0_g2;TRINITY_DN1787_c13_g1;TRINITY_DN1800_c0_g1;TRINITY_DN1858_c3_g1;TRINITY_DN2286_c1_g1;TRINITY_DN2204_c0_g1;TRINITY_DN2204_c0_g2;TRINITY…
organ regeneration	biological_process	GO:0031100	107	TRINITY_DN25_c0_g1;TRINITY_DN125_c1_g1;TRINITY_DN178_c1_g1;TRINITY_DN197_c1_g1;TRINITY_DN319_c0_g2;TRINITY_DN358_c0_g1;TRINITY_DN543_c0_g2;TRINITY_DN582_c0_g2;TRINITY_DN1167_c0_g1;TRINITY_DN1268_c0_g1;TRINITY_DN1264_c2_g1;TRINITY_DN1619_c0_g1;TRINITY_DN1790_c0_g3;TRINITY_DN1701_c0_g1;TRINITY_DN1880_c2_g1;TRINITY_DN1871_c0_g1;TRINITY_DN2049_c0_g1;TRINITY_DN2012_c0_g2;TRINITY_DN2167_c0_g2;TRINITY_D…
GDP binding	molecular_function	GO:0019003	107	TRINITY_DN88_c0_g1;TRINITY_DN163_c1_g1;TRINITY_DN124_c0_g1;TRINITY_DN124_c0_g2;TRINITY_DN231_c1_g1;TRINITY_DN308_c1_g1;TRINITY_DN595_c1_g1;TRINITY_DN640_c0_g2;TRINITY_DN904_c0_g1;TRINITY_DN1018_c0_g1;TRINITY_DN1264_c3_g1;TRINITY_DN1228_c1_g2;TRINITY_DN1228_c1_g1;TRINITY_DN1520_c0_g1;TRINITY_DN1647_c4_g1;TRINITY_DN1605_c0_g1;TRINITY_DN1845_c1_g3;TRINITY_DN1845_c1_g1;TRINITY_DN1845_c2_g1;TRINITY_DN…
embryonic digit morphogenesis	biological_process	GO:0042733	107	TRINITY_DN42_c0_g2;TRINITY_DN22_c0_g5;TRINITY_DN45_c1_g1;TRINITY_DN217_c0_g3;TRINITY_DN307_c2_g1;TRINITY_DN399_c1_g1;TRINITY_DN332_c4_g2;TRINITY_DN481_c1_g3;TRINITY_DN485_c1_g1;TRINITY_DN512_c0_g2;TRINITY_DN582_c1_g1;TRINITY_DN541_c2_g1;TRINITY_DN649_c6_g1;TRINITY_DN850_c0_g1;TRINITY_DN850_c0_g2;TRINITY_DN919_c1_g1;TRINITY_DN1062_c1_g1;TRINITY_DN1320_c0_g3;TRINITY_DN1340_c0_g2;TRINITY_DN1499_c0_g…
iron ion homeostasis	biological_process	GO:0055072	107	TRINITY_DN83_c1_g1;TRINITY_DN86_c8_g1;TRINITY_DN312_c1_g2;TRINITY_DN312_c1_g1;TRINITY_DN493_c1_g1;TRINITY_DN809_c0_g1;TRINITY_DN1055_c1_g1;TRINITY_DN1489_c3_g1;TRINITY_DN1608_c0_g2;TRINITY_DN2168_c0_g1;TRINITY_DN2640_c3_g1;TRINITY_DN2701_c2_g1;TRINITY_DN2824_c2_g1;TRINITY_DN2921_c0_g2;TRINITY_DN3094_c0_g1;TRINITY_DN3290_c0_g1;TRINITY_DN3290_c0_g3;TRINITY_DN3849_c0_g2;TRINITY_DN3884_c0_g1;TRINITY_…
cellular protein modification process	biological_process	GO:0006464	107	TRINITY_DN86_c2_g1;TRINITY_DN86_c9_g2;TRINITY_DN130_c5_g1;TRINITY_DN145_c1_g1;TRINITY_DN289_c0_g1;TRINITY_DN289_c0_g3;TRINITY_DN568_c0_g1;TRINITY_DN661_c1_g1;TRINITY_DN824_c11_g1;TRINITY_DN876_c0_g1;TRINITY_DN874_c1_g1;TRINITY_DN901_c3_g1;TRINITY_DN944_c0_g1;TRINITY_DN1021_c0_g1;TRINITY_DN1223_c0_g1;TRINITY_DN1309_c0_g1;TRINITY_DN1351_c1_g2;TRINITY_DN1552_c1_g2;TRINITY_DN1622_c0_g1;TRINITY_DN1980…
cartilage development	biological_process	GO:0051216	107	TRINITY_DN86_c3_g2;TRINITY_DN11_c0_g1;TRINITY_DN165_c1_g2;TRINITY_DN244_c0_g1;TRINITY_DN217_c0_g3;TRINITY_DN582_c1_g1;TRINITY_DN561_c0_g2;TRINITY_DN594_c2_g1;TRINITY_DN572_c5_g1;TRINITY_DN682_c2_g1;TRINITY_DN756_c0_g2;TRINITY_DN1063_c0_g1;TRINITY_DN1030_c0_g1;TRINITY_DN1239_c3_g2;TRINITY_DN1473_c1_g2;TRINITY_DN1486_c0_g2;TRINITY_DN1790_c0_g3;TRINITY_DN2011_c1_g1;TRINITY_DN2110_c1_g1;TRINITY_DN238…
response to hydrogen peroxide	biological_process	GO:0042542	107	TRINITY_DN25_c0_g1;TRINITY_DN387_c2_g1;TRINITY_DN513_c0_g1;TRINITY_DN665_c6_g1;TRINITY_DN1084_c1_g1;TRINITY_DN1155_c1_g1;TRINITY_DN1267_c0_g1;TRINITY_DN1345_c2_g1;TRINITY_DN1420_c0_g2;TRINITY_DN1590_c0_g3;TRINITY_DN1599_c0_g1;TRINITY_DN1541_c0_g3;TRINITY_DN1681_c1_g1;TRINITY_DN1735_c5_g1;TRINITY_DN1719_c0_g1;TRINITY_DN1709_c0_g1;TRINITY_DN2191_c2_g1;TRINITY_DN2191_c6_g1;TRINITY_DN2341_c1_g1;TRINI…
RNA polymerase II core promoter sequence-specific DNA binding	molecular_function	GO:0000979	106	TRINITY_DN52_c0_g2;TRINITY_DN11_c0_g1;TRINITY_DN165_c1_g2;TRINITY_DN110_c4_g1;TRINITY_DN244_c0_g1;TRINITY_DN319_c0_g2;TRINITY_DN477_c1_g2;TRINITY_DN465_c0_g1;TRINITY_DN583_c0_g1;TRINITY_DN528_c0_g1;TRINITY_DN572_c5_g1;TRINITY_DN895_c0_g1;TRINITY_DN849_c0_g2;TRINITY_DN849_c0_g3;TRINITY_DN938_c0_g1;TRINITY_DN1026_c0_g1;TRINITY_DN1100_c1_g1;TRINITY_DN1222_c1_g1;TRINITY_DN1267_c3_g1;TRINITY_DN1287_c3…
Cul3-RING ubiquitin ligase complex	cellular_component	GO:0031463	106	TRINITY_DN86_c8_g1;TRINITY_DN188_c2_g1;TRINITY_DN352_c0_g2;TRINITY_DN408_c4_g1;TRINITY_DN551_c1_g1;TRINITY_DN620_c0_g1;TRINITY_DN765_c1_g1;TRINITY_DN845_c1_g1;TRINITY_DN1149_c0_g1;TRINITY_DN1245_c0_g1;TRINITY_DN1560_c0_g3;TRINITY_DN1578_c4_g1;TRINITY_DN1743_c0_g1;TRINITY_DN1743_c0_g2;TRINITY_DN1708_c1_g1;TRINITY_DN1728_c2_g1;TRINITY_DN2303_c2_g2;TRINITY_DN2363_c0_g1;TRINITY_DN2397_c1_g1;TRINITY_D…
response to insulin	biological_process	GO:0032868	106	TRINITY_DN10_c1_g1;TRINITY_DN277_c0_g1;TRINITY_DN385_c0_g1;TRINITY_DN521_c0_g1;TRINITY_DN572_c1_g1;TRINITY_DN665_c3_g1;TRINITY_DN813_c0_g1;TRINITY_DN904_c5_g1;TRINITY_DN985_c2_g1;TRINITY_DN1094_c1_g1;TRINITY_DN1401_c0_g1;TRINITY_DN1575_c1_g1;TRINITY_DN1527_c1_g1;TRINITY_DN1658_c1_g1;TRINITY_DN1691_c3_g1;TRINITY_DN1691_c3_g2;TRINITY_DN1905_c2_g2;TRINITY_DN2030_c0_g1;TRINITY_DN2030_c0_g3;TRINITY_DN…
actin filament	cellular_component	GO:0005884	106	TRINITY_DN72_c2_g2;TRINITY_DN75_c0_g1;TRINITY_DN121_c1_g1;TRINITY_DN181_c0_g1;TRINITY_DN178_c0_g2;TRINITY_DN249_c0_g1;TRINITY_DN352_c0_g2;TRINITY_DN485_c0_g1;TRINITY_DN572_c6_g1;TRINITY_DN785_c1_g3;TRINITY_DN785_c1_g1;TRINITY_DN901_c8_g1;TRINITY_DN1012_c0_g1;TRINITY_DN1474_c0_g1;TRINITY_DN1474_c0_g2;TRINITY_DN1402_c0_g1;TRINITY_DN1434_c0_g2;TRINITY_DN1575_c1_g1;TRINITY_DN1624_c0_g1;TRINITY_DN1755…
positive regulation of fibroblast proliferation	biological_process	GO:0048146	106	TRINITY_DN153_c1_g1;TRINITY_DN112_c3_g1;TRINITY_DN269_c0_g1;TRINITY_DN217_c0_g3;TRINITY_DN203_c1_g1;TRINITY_DN229_c0_g1;TRINITY_DN362_c0_g1;TRINITY_DN491_c2_g1;TRINITY_DN543_c0_g2;TRINITY_DN521_c0_g1;TRINITY_DN563_c0_g1;TRINITY_DN782_c0_g1;TRINITY_DN939_c0_g2;TRINITY_DN1065_c2_g1;TRINITY_DN1268_c0_g1;TRINITY_DN1437_c0_g1;TRINITY_DN1528_c1_g1;TRINITY_DN1537_c0_g3;TRINITY_DN1541_c0_g2;TRINITY_DN186…
protein oligomerization	biological_process	GO:0051259	106	TRINITY_DN20_c0_g1;TRINITY_DN20_c0_g2;TRINITY_DN49_c1_g1;TRINITY_DN157_c0_g1;TRINITY_DN235_c1_g1;TRINITY_DN231_c0_g1;TRINITY_DN352_c0_g2;TRINITY_DN307_c0_g1;TRINITY_DN307_c0_g2;TRINITY_DN333_c0_g1;TRINITY_DN412_c0_g1;TRINITY_DN525_c0_g1;TRINITY_DN653_c1_g2;TRINITY_DN854_c0_g2;TRINITY_DN1232_c0_g1;TRINITY_DN1238_c1_g1;TRINITY_DN1639_c1_g1;TRINITY_DN1775_c0_g1;TRINITY_DN1775_c0_g3;TRINITY_DN1764_c0…
response to cytokine	biological_process	GO:0034097	105	TRINITY_DN35_c0_g1;TRINITY_DN28_c0_g3;TRINITY_DN110_c2_g2;TRINITY_DN291_c0_g1;TRINITY_DN494_c0_g2;TRINITY_DN576_c4_g1;TRINITY_DN1084_c1_g1;TRINITY_DN1275_c0_g1;TRINITY_DN1275_c0_g2;TRINITY_DN1275_c0_g3;TRINITY_DN1375_c0_g1;TRINITY_DN1375_c0_g2;TRINITY_DN1426_c0_g1;TRINITY_DN1482_c1_g2;TRINITY_DN1537_c0_g3;TRINITY_DN1541_c0_g2;TRINITY_DN1527_c2_g1;TRINITY_DN1615_c1_g2;TRINITY_DN1790_c0_g3;TRINITY_…
photoreceptor outer segment	cellular_component	GO:0001750	105	TRINITY_DN21_c0_g3;TRINITY_DN22_c0_g3;TRINITY_DN134_c1_g1;TRINITY_DN259_c1_g1;TRINITY_DN392_c1_g1;TRINITY_DN546_c2_g1;TRINITY_DN665_c0_g3;TRINITY_DN734_c0_g1;TRINITY_DN793_c0_g1;TRINITY_DN872_c0_g1;TRINITY_DN1272_c7_g2;TRINITY_DN1334_c0_g1;TRINITY_DN1559_c1_g2;TRINITY_DN1616_c3_g1;TRINITY_DN1740_c0_g1;TRINITY_DN2101_c4_g1;TRINITY_DN2278_c1_g3;TRINITY_DN2397_c1_g1;TRINITY_DN2412_c0_g1;TRINITY_DN26…
regulation of circadian rhythm	biological_process	GO:0042752	105	TRINITY_DN165_c0_g2;TRINITY_DN248_c0_g1;TRINITY_DN288_c2_g1;TRINITY_DN377_c0_g1;TRINITY_DN332_c1_g1;TRINITY_DN443_c0_g2;TRINITY_DN520_c3_g3;TRINITY_DN520_c1_g1;TRINITY_DN576_c0_g1;TRINITY_DN601_c0_g1;TRINITY_DN678_c3_g1;TRINITY_DN792_c0_g1;TRINITY_DN792_c0_g2;TRINITY_DN845_c0_g1;TRINITY_DN819_c9_g1;TRINITY_DN834_c0_g1;TRINITY_DN980_c0_g2;TRINITY_DN1146_c0_g4;TRINITY_DN1302_c3_g1;TRINITY_DN1342_c1…
syntaxin binding	molecular_function	GO:0019905	105	TRINITY_DN0_c5_g1;TRINITY_DN136_c0_g1;TRINITY_DN191_c1_g1;TRINITY_DN285_c0_g1;TRINITY_DN372_c2_g1;TRINITY_DN468_c0_g1;TRINITY_DN468_c0_g2;TRINITY_DN468_c0_g3;TRINITY_DN550_c0_g1;TRINITY_DN508_c2_g1;TRINITY_DN885_c0_g3;TRINITY_DN965_c0_g1;TRINITY_DN1012_c0_g1;TRINITY_DN1271_c0_g1;TRINITY_DN1345_c1_g1;TRINITY_DN1475_c2_g1;TRINITY_DN1658_c1_g1;TRINITY_DN1714_c2_g1;TRINITY_DN1707_c0_g1;TRINITY_DN2045…
programmed cell death	biological_process	GO:0012501	105	TRINITY_DN39_c1_g2;TRINITY_DN74_c0_g1;TRINITY_DN200_c0_g1;TRINITY_DN306_c1_g1;TRINITY_DN548_c5_g2;TRINITY_DN682_c1_g2;TRINITY_DN742_c0_g1;TRINITY_DN833_c0_g1;TRINITY_DN978_c0_g2;TRINITY_DN944_c0_g1;TRINITY_DN1107_c0_g1;TRINITY_DN1151_c1_g1;TRINITY_DN1263_c1_g2;TRINITY_DN1271_c0_g1;TRINITY_DN1518_c5_g1;TRINITY_DN1656_c1_g1;TRINITY_DN1747_c0_g1;TRINITY_DN1719_c0_g1;TRINITY_DN1867_c1_g1;TRINITY_DN21…
positive regulation of osteoblast differentiation	biological_process	GO:0045669	104	TRINITY_DN74_c0_g1;TRINITY_DN244_c0_g1;TRINITY_DN265_c0_g1;TRINITY_DN265_c0_g2;TRINITY_DN427_c0_g1;TRINITY_DN439_c1_g2;TRINITY_DN439_c1_g1;TRINITY_DN512_c0_g2;TRINITY_DN563_c0_g1;TRINITY_DN682_c2_g1;TRINITY_DN703_c1_g1;TRINITY_DN1275_c0_g1;TRINITY_DN1275_c0_g2;TRINITY_DN1275_c0_g3;TRINITY_DN1203_c0_g3;TRINITY_DN1486_c0_g2;TRINITY_DN1544_c1_g1;TRINITY_DN1671_c0_g1;TRINITY_DN1671_c0_g2;TRINITY_DN16…
B cell differentiation	biological_process	GO:0030183	103	TRINITY_DN196_c0_g2;TRINITY_DN165_c1_g2;TRINITY_DN477_c1_g2;TRINITY_DN695_c0_g1;TRINITY_DN899_c0_g1;TRINITY_DN938_c0_g1;TRINITY_DN1266_c0_g1;TRINITY_DN1332_c1_g1;TRINITY_DN1313_c1_g1;TRINITY_DN1673_c0_g1;TRINITY_DN1704_c0_g1;TRINITY_DN1827_c4_g1;TRINITY_DN2049_c0_g2;TRINITY_DN2191_c6_g1;TRINITY_DN2241_c2_g1;TRINITY_DN2240_c4_g1;TRINITY_DN2350_c3_g1;TRINITY_DN2430_c1_g1;TRINITY_DN2661_c0_g2;TRINIT…
cellular response to transforming growth factor beta stimulus	biological_process	GO:0071560	103	TRINITY_DN13_c0_g2;TRINITY_DN11_c0_g1;TRINITY_DN109_c1_g1;TRINITY_DN240_c2_g1;TRINITY_DN205_c0_g1;TRINITY_DN217_c0_g3;TRINITY_DN307_c2_g1;TRINITY_DN921_c0_g2;TRINITY_DN1097_c0_g1;TRINITY_DN1068_c1_g2;TRINITY_DN1345_c2_g1;TRINITY_DN1458_c0_g1;TRINITY_DN1473_c1_g2;TRINITY_DN1420_c0_g2;TRINITY_DN1506_c4_g1;TRINITY_DN1537_c0_g3;TRINITY_DN1549_c2_g1;TRINITY_DN1652_c0_g3;TRINITY_DN1735_c1_g1;TRINITY_DN…
regulation of cell adhesion	biological_process	GO:0030155	103	TRINITY_DN1_c0_g1;TRINITY_DN49_c4_g1;TRINITY_DN48_c0_g1;TRINITY_DN148_c0_g1;TRINITY_DN172_c0_g1;TRINITY_DN322_c4_g1;TRINITY_DN471_c0_g1;TRINITY_DN583_c0_g1;TRINITY_DN770_c0_g1;TRINITY_DN772_c6_g1;TRINITY_DN802_c0_g1;TRINITY_DN834_c1_g1;TRINITY_DN1396_c2_g1;TRINITY_DN1342_c1_g1;TRINITY_DN1473_c1_g2;TRINITY_DN1802_c0_g1;TRINITY_DN1955_c0_g1;TRINITY_DN2045_c4_g1;TRINITY_DN2096_c0_g2;TRINITY_DN2182_c…
B cell receptor signaling pathway	biological_process	GO:0050853	103	TRINITY_DN152_c0_g2;TRINITY_DN176_c3_g1;TRINITY_DN135_c0_g1;TRINITY_DN439_c1_g1;TRINITY_DN572_c1_g1;TRINITY_DN576_c0_g3;TRINITY_DN653_c1_g1;TRINITY_DN1391_c1_g1;TRINITY_DN1391_c0_g1;TRINITY_DN1313_c1_g1;TRINITY_DN1926_c0_g1;TRINITY_DN1926_c0_g2;TRINITY_DN2045_c4_g1;TRINITY_DN2176_c0_g1;TRINITY_DN2191_c6_g1;TRINITY_DN2365_c2_g1;TRINITY_DN2365_c0_g1;TRINITY_DN2350_c3_g1;TRINITY_DN2366_c2_g1;TRINITY…
response to mechanical stimulus	biological_process	GO:0009612	103	TRINITY_DN74_c0_g1;TRINITY_DN8_c1_g1;TRINITY_DN87_c0_g4;TRINITY_DN87_c0_g1;TRINITY_DN87_c0_g2;TRINITY_DN291_c0_g1;TRINITY_DN205_c0_g1;TRINITY_DN354_c0_g2;TRINITY_DN319_c0_g1;TRINITY_DN1094_c1_g1;TRINITY_DN1084_c1_g1;TRINITY_DN1182_c0_g1;TRINITY_DN1239_c3_g2;TRINITY_DN1420_c0_g2;TRINITY_DN1558_c0_g1;TRINITY_DN1558_c0_g2;TRINITY_DN1622_c0_g1;TRINITY_DN1719_c0_g1;TRINITY_DN1814_c2_g1;TRINITY_DN2147_…
cell leading edge	cellular_component	GO:0031252	103	TRINITY_DN56_c2_g2;TRINITY_DN49_c2_g1;TRINITY_DN181_c0_g1;TRINITY_DN316_c2_g3;TRINITY_DN500_c1_g1;TRINITY_DN872_c3_g1;TRINITY_DN901_c8_g1;TRINITY_DN1392_c0_g2;TRINITY_DN1304_c7_g1;TRINITY_DN1351_c0_g1;TRINITY_DN1351_c0_g2;TRINITY_DN1422_c3_g1;TRINITY_DN1659_c3_g1;TRINITY_DN1677_c0_g1;TRINITY_DN1728_c0_g2;TRINITY_DN2045_c4_g1;TRINITY_DN2077_c2_g1;TRINITY_DN2089_c0_g1;TRINITY_DN2137_c0_g1;TRINITY_D…
non-membrane spanning protein tyrosine kinase activity	molecular_function	GO:0004715	102	TRINITY_DN387_c4_g1;TRINITY_DN398_c0_g1;TRINITY_DN398_c0_g2;TRINITY_DN572_c1_g1;TRINITY_DN742_c1_g1;TRINITY_DN849_c5_g1;TRINITY_DN1150_c0_g2;TRINITY_DN1435_c0_g1;TRINITY_DN1472_c1_g1;TRINITY_DN1719_c0_g1;TRINITY_DN1704_c0_g1;TRINITY_DN1916_c0_g3;TRINITY_DN2045_c4_g1;TRINITY_DN2341_c1_g1;TRINITY_DN2366_c2_g1;TRINITY_DN2762_c0_g1;TRINITY_DN2703_c0_g1;TRINITY_DN3273_c0_g1;TRINITY_DN3334_c0_g1;TRINIT…
neural tube development	biological_process	GO:0021915	102	TRINITY_DN62_c2_g1;TRINITY_DN62_c0_g1;TRINITY_DN99_c0_g4;TRINITY_DN217_c0_g3;TRINITY_DN392_c0_g1;TRINITY_DN389_c0_g1;TRINITY_DN373_c0_g1;TRINITY_DN512_c0_g1;TRINITY_DN649_c6_g1;TRINITY_DN794_c0_g1;TRINITY_DN876_c1_g1;TRINITY_DN895_c0_g1;TRINITY_DN840_c0_g1;TRINITY_DN802_c0_g1;TRINITY_DN1073_c1_g1;TRINITY_DN1320_c0_g3;TRINITY_DN1340_c0_g2;TRINITY_DN1501_c0_g1;TRINITY_DN1517_c0_g1;TRINITY_DN1828_c4…
inner ear morphogenesis	biological_process	GO:0042472	102	TRINITY_DN86_c3_g1;TRINITY_DN86_c3_g3;TRINITY_DN86_c3_g4;TRINITY_DN110_c4_g1;TRINITY_DN259_c0_g6;TRINITY_DN276_c0_g2;TRINITY_DN217_c0_g3;TRINITY_DN301_c0_g1;TRINITY_DN514_c0_g4;TRINITY_DN697_c0_g1;TRINITY_DN648_c3_g1;TRINITY_DN648_c3_g2;TRINITY_DN739_c1_g1;TRINITY_DN791_c0_g1;TRINITY_DN865_c0_g2;TRINITY_DN834_c0_g2;TRINITY_DN1285_c3_g1;TRINITY_DN1363_c0_g1;TRINITY_DN1447_c5_g1;TRINITY_DN1471_c0_g…
dendrite morphogenesis	biological_process	GO:0048813	102	TRINITY_DN312_c1_g2;TRINITY_DN312_c1_g1;TRINITY_DN387_c4_g1;TRINITY_DN302_c0_g1;TRINITY_DN373_c0_g1;TRINITY_DN411_c6_g1;TRINITY_DN545_c0_g1;TRINITY_DN769_c0_g1;TRINITY_DN809_c0_g1;TRINITY_DN825_c0_g2;TRINITY_DN964_c0_g1;TRINITY_DN1055_c1_g1;TRINITY_DN1342_c1_g1;TRINITY_DN2182_c2_g1;TRINITY_DN2273_c1_g1;TRINITY_DN2386_c2_g1;TRINITY_DN2679_c1_g1;TRINITY_DN3290_c0_g1;TRINITY_DN3290_c0_g3;TRINITY_DN3…
cellular response to interleukin-1	biological_process	GO:0071347	102	TRINITY_DN13_c0_g2;TRINITY_DN265_c0_g1;TRINITY_DN691_c0_g1;TRINITY_DN612_c0_g1;TRINITY_DN732_c0_g1;TRINITY_DN732_c0_g2;TRINITY_DN898_c0_g1;TRINITY_DN815_c0_g1;TRINITY_DN1017_c0_g1;TRINITY_DN1084_c1_g1;TRINITY_DN1302_c3_g1;TRINITY_DN1473_c1_g2;TRINITY_DN1558_c0_g1;TRINITY_DN1558_c0_g2;TRINITY_DN1596_c0_g1;TRINITY_DN1569_c1_g2;TRINITY_DN1537_c0_g3;TRINITY_DN1527_c1_g1;TRINITY_DN1647_c2_g1;TRINITY_D…
cellular response to hydrogen peroxide	biological_process	GO:0070301	102	TRINITY_DN38_c1_g1;TRINITY_DN176_c3_g1;TRINITY_DN264_c0_g1;TRINITY_DN307_c2_g1;TRINITY_DN339_c0_g1;TRINITY_DN362_c0_g1;TRINITY_DN459_c2_g1;TRINITY_DN543_c1_g1;TRINITY_DN520_c3_g1;TRINITY_DN576_c0_g3;TRINITY_DN611_c4_g1;TRINITY_DN770_c0_g1;TRINITY_DN872_c3_g1;TRINITY_DN908_c0_g1;TRINITY_DN1022_c0_g1;TRINITY_DN1077_c2_g1;TRINITY_DN1166_c0_g1;TRINITY_DN1146_c0_g4;TRINITY_DN1267_c3_g1;TRINITY_DN1423_…
regulation of protein phosphorylation	biological_process	GO:0001932	102	TRINITY_DN10_c3_g1;TRINITY_DN112_c3_g1;TRINITY_DN191_c0_g1;TRINITY_DN354_c6_g1;TRINITY_DN373_c0_g1;TRINITY_DN333_c1_g1;TRINITY_DN436_c0_g1;TRINITY_DN508_c3_g1;TRINITY_DN742_c1_g1;TRINITY_DN785_c2_g1;TRINITY_DN957_c0_g1;TRINITY_DN1146_c0_g4;TRINITY_DN1216_c0_g2;TRINITY_DN1546_c0_g1;TRINITY_DN1955_c0_g1;TRINITY_DN2198_c1_g1;TRINITY_DN2401_c0_g1;TRINITY_DN2555_c2_g2;TRINITY_DN2659_c1_g1;TRINITY_DN26…
regulation of gene expression, epigenetic	biological_process	GO:0040029	102	TRINITY_DN51_c1_g2;TRINITY_DN259_c2_g1;TRINITY_DN307_c2_g1;TRINITY_DN338_c1_g1;TRINITY_DN481_c1_g4;TRINITY_DN551_c1_g1;TRINITY_DN529_c7_g1;TRINITY_DN591_c1_g1;TRINITY_DN659_c0_g1;TRINITY_DN872_c3_g1;TRINITY_DN918_c0_g1;TRINITY_DN1014_c0_g1;TRINITY_DN1026_c0_g1;TRINITY_DN1050_c0_g2;TRINITY_DN1217_c0_g1;TRINITY_DN1371_c0_g2;TRINITY_DN1365_c0_g1;TRINITY_DN1409_c0_g1;TRINITY_DN1513_c0_g1;TRINITY_DN16…
neuron apoptotic process	biological_process	GO:0051402	102	TRINITY_DN236_c0_g1;TRINITY_DN494_c2_g2;TRINITY_DN415_c4_g1;TRINITY_DN769_c0_g1;TRINITY_DN899_c0_g1;TRINITY_DN1022_c0_g1;TRINITY_DN1065_c1_g1;TRINITY_DN1112_c1_g1;TRINITY_DN1155_c1_g1;TRINITY_DN1287_c0_g2;TRINITY_DN1608_c0_g2;TRINITY_DN1771_c0_g1;TRINITY_DN1880_c1_g1;TRINITY_DN2032_c2_g1;TRINITY_DN2158_c1_g1;TRINITY_DN2191_c6_g1;TRINITY_DN2341_c0_g1;TRINITY_DN2490_c0_g1;TRINITY_DN3077_c0_g1;TRINI…
somatic stem cell population maintenance	biological_process	GO:0035019	102	TRINITY_DN55_c3_g2;TRINITY_DN86_c3_g2;TRINITY_DN153_c1_g1;TRINITY_DN477_c1_g2;TRINITY_DN443_c0_g2;TRINITY_DN510_c0_g2;TRINITY_DN619_c0_g1;TRINITY_DN756_c0_g2;TRINITY_DN895_c0_g1;TRINITY_DN890_c0_g1;TRINITY_DN890_c0_g3;TRINITY_DN849_c0_g2;TRINITY_DN849_c0_g3;TRINITY_DN1014_c0_g1;TRINITY_DN1085_c0_g1;TRINITY_DN1156_c2_g1;TRINITY_DN1165_c0_g1;TRINITY_DN1473_c1_g2;TRINITY_DN1697_c0_g2;TRINITY_DN1885_…
neuromuscular junction	cellular_component	GO:0031594	101	TRINITY_DN67_c0_g1;TRINITY_DN205_c0_g1;TRINITY_DN234_c0_g1;TRINITY_DN234_c0_g2;TRINITY_DN293_c0_g1;TRINITY_DN336_c0_g1;TRINITY_DN494_c2_g2;TRINITY_DN512_c0_g4;TRINITY_DN512_c0_g3;TRINITY_DN545_c0_g1;TRINITY_DN572_c6_g1;TRINITY_DN769_c0_g1;TRINITY_DN712_c9_g1;TRINITY_DN1103_c0_g1;TRINITY_DN1259_c0_g1;TRINITY_DN1393_c0_g1;TRINITY_DN1567_c0_g1;TRINITY_DN1541_c0_g1;TRINITY_DN1624_c0_g1;TRINITY_DN1843…
negative regulation of inflammatory response	biological_process	GO:0050728	101	TRINITY_DN1_c3_g1;TRINITY_DN1_c3_g2;TRINITY_DN132_c0_g2;TRINITY_DN110_c4_g1;TRINITY_DN204_c1_g1;TRINITY_DN483_c0_g1;TRINITY_DN739_c1_g1;TRINITY_DN791_c0_g1;TRINITY_DN1070_c2_g3;TRINITY_DN1160_c0_g2;TRINITY_DN1102_c0_g2;TRINITY_DN1297_c1_g1;TRINITY_DN1218_c0_g1;TRINITY_DN1302_c3_g1;TRINITY_DN1457_c0_g1;TRINITY_DN1522_c0_g2;TRINITY_DN1636_c1_g1;TRINITY_DN1792_c0_g1;TRINITY_DN1753_c0_g1;TRINITY_DN17…
skeletal muscle tissue development	biological_process	GO:0007519	101	TRINITY_DN67_c0_g1;TRINITY_DN165_c1_g2;TRINITY_DN291_c0_g1;TRINITY_DN205_c2_g1;TRINITY_DN638_c0_g1;TRINITY_DN746_c0_g1;TRINITY_DN769_c0_g1;TRINITY_DN811_c0_g1;TRINITY_DN1176_c0_g1;TRINITY_DN1352_c0_g2;TRINITY_DN1531_c0_g1;TRINITY_DN1541_c0_g4;TRINITY_DN1641_c0_g1;TRINITY_DN1641_c0_g2;TRINITY_DN2089_c0_g1;TRINITY_DN2180_c5_g1;TRINITY_DN2121_c0_g1;TRINITY_DN2108_c0_g1;TRINITY_DN2240_c0_g1;TRINITY_D…
antigen processing and presentation of peptide antigen via MHC class I	biological_process	GO:0002474	101	TRINITY_DN50_c1_g1;TRINITY_DN267_c3_g1;TRINITY_DN548_c5_g2;TRINITY_DN682_c1_g2;TRINITY_DN693_c0_g1;TRINITY_DN1107_c0_g1;TRINITY_DN1489_c3_g1;TRINITY_DN1457_c1_g1;TRINITY_DN1570_c1_g1;TRINITY_DN1656_c1_g1;TRINITY_DN2185_c0_g1;TRINITY_DN2396_c4_g1;TRINITY_DN2543_c0_g2;TRINITY_DN2536_c0_g1;TRINITY_DN2773_c1_g1;TRINITY_DN2773_c0_g1;TRINITY_DN2773_c0_g2;TRINITY_DN2857_c0_g1;TRINITY_DN3030_c0_g1;TRINIT…
stress-activated protein kinase signaling cascade	biological_process	GO:0031098	101	TRINITY_DN21_c0_g1;TRINITY_DN115_c0_g1;TRINITY_DN395_c1_g1;TRINITY_DN333_c0_g1;TRINITY_DN425_c0_g1;TRINITY_DN425_c0_g2;TRINITY_DN513_c0_g1;TRINITY_DN764_c1_g1;TRINITY_DN798_c5_g1;TRINITY_DN966_c1_g1;TRINITY_DN1118_c1_g1;TRINITY_DN1216_c0_g1;TRINITY_DN1216_c0_g2;TRINITY_DN1200_c0_g1;TRINITY_DN1490_c1_g1;TRINITY_DN1618_c0_g1;TRINITY_DN1960_c0_g1;TRINITY_DN2090_c0_g1;TRINITY_DN2018_c17_g1;TRINITY_DN…
xenobiotic metabolic process	biological_process	GO:0006805	101	TRINITY_DN287_c4_g1;TRINITY_DN456_c0_g1;TRINITY_DN566_c0_g2;TRINITY_DN668_c1_g1;TRINITY_DN734_c0_g1;TRINITY_DN935_c2_g1;TRINITY_DN1022_c1_g1;TRINITY_DN1302_c3_g1;TRINITY_DN1459_c1_g1;TRINITY_DN1993_c0_g1;TRINITY_DN2128_c0_g1;TRINITY_DN2437_c0_g1;TRINITY_DN2572_c2_g1;TRINITY_DN2769_c5_g1;TRINITY_DN3173_c0_g4;TRINITY_DN3173_c0_g1;TRINITY_DN3628_c0_g1;TRINITY_DN3638_c2_g2;TRINITY_DN3906_c0_g1;TRINIT…
heart looping	biological_process	GO:0001947	101	TRINITY_DN93_c0_g2;TRINITY_DN42_c0_g2;TRINITY_DN62_c2_g1;TRINITY_DN45_c1_g1;TRINITY_DN125_c3_g1;TRINITY_DN125_c3_g2;TRINITY_DN263_c2_g1;TRINITY_DN217_c0_g3;TRINITY_DN332_c4_g2;TRINITY_DN389_c0_g1;TRINITY_DN494_c2_g2;TRINITY_DN582_c1_g1;TRINITY_DN619_c1_g1;TRINITY_DN844_c0_g1;TRINITY_DN941_c0_g1;TRINITY_DN989_c2_g1;TRINITY_DN1102_c0_g2;TRINITY_DN1378_c0_g1;TRINITY_DN1517_c0_g1;TRINITY_DN1738_c0_g1…
Rab guanyl-nucleotide exchange factor activity	molecular_function	GO:0017112	101	TRINITY_DN56_c1_g1;TRINITY_DN121_c0_g1;TRINITY_DN156_c1_g1;TRINITY_DN249_c0_g1;TRINITY_DN519_c0_g1;TRINITY_DN544_c2_g1;TRINITY_DN797_c0_g1;TRINITY_DN742_c2_g1;TRINITY_DN800_c2_g2;TRINITY_DN800_c2_g1;TRINITY_DN929_c0_g1;TRINITY_DN933_c0_g1;TRINITY_DN933_c0_g2;TRINITY_DN1140_c2_g1;TRINITY_DN1328_c4_g1;TRINITY_DN1455_c0_g1;TRINITY_DN1467_c0_g1;TRINITY_DN1902_c2_g1;TRINITY_DN2108_c2_g1;TRINITY_DN2616…
endosomal transport	biological_process	GO:0016197	100	TRINITY_DN94_c0_g1;TRINITY_DN312_c1_g2;TRINITY_DN312_c1_g1;TRINITY_DN372_c2_g1;TRINITY_DN469_c0_g2;TRINITY_DN519_c0_g1;TRINITY_DN685_c0_g2;TRINITY_DN823_c1_g1;TRINITY_DN1055_c1_g1;TRINITY_DN1206_c1_g1;TRINITY_DN1345_c1_g4;TRINITY_DN1405_c0_g1;TRINITY_DN1486_c0_g1;TRINITY_DN1486_c0_g2;TRINITY_DN1509_c0_g1;TRINITY_DN1503_c0_g1;TRINITY_DN1597_c1_g1;TRINITY_DN1538_c2_g1;TRINITY_DN1608_c0_g2;TRINITY_D…
cytoplasmic side of plasma membrane	cellular_component	GO:0009898	100	TRINITY_DN12_c0_g1;TRINITY_DN86_c3_g2;TRINITY_DN111_c2_g1;TRINITY_DN264_c2_g2;TRINITY_DN378_c0_g1;TRINITY_DN756_c0_g2;TRINITY_DN842_c0_g1;TRINITY_DN1186_c0_g1;TRINITY_DN1250_c0_g1;TRINITY_DN1216_c0_g2;TRINITY_DN1392_c0_g2;TRINITY_DN1474_c6_g1;TRINITY_DN1568_c2_g2;TRINITY_DN1517_c0_g2;TRINITY_DN1517_c0_g3;TRINITY_DN1777_c3_g5;TRINITY_DN1867_c1_g1;TRINITY_DN1808_c4_g1;TRINITY_DN1802_c0_g1;TRINITY_D…
cellular response to calcium ion	biological_process	GO:0071277	100	TRINITY_DN103_c1_g1;TRINITY_DN181_c0_g1;TRINITY_DN258_c7_g1;TRINITY_DN217_c0_g3;TRINITY_DN380_c1_g2;TRINITY_DN302_c0_g1;TRINITY_DN481_c0_g1;TRINITY_DN467_c7_g1;TRINITY_DN458_c2_g1;TRINITY_DN677_c1_g1;TRINITY_DN708_c1_g1;TRINITY_DN978_c0_g2;TRINITY_DN1009_c0_g1;TRINITY_DN1097_c0_g1;TRINITY_DN1158_c1_g1;TRINITY_DN1182_c0_g1;TRINITY_DN1790_c1_g1;TRINITY_DN1801_c3_g1;TRINITY_DN2084_c1_g2;TRINITY_DN20…
cytokine activity	molecular_function	GO:0005125	100	TRINITY_DN98_c1_g5;TRINITY_DN14_c0_g1;TRINITY_DN138_c0_g1;TRINITY_DN156_c1_g2;TRINITY_DN217_c0_g3;TRINITY_DN512_c0_g2;TRINITY_DN594_c2_g1;TRINITY_DN645_c0_g1;TRINITY_DN645_c0_g2;TRINITY_DN770_c0_g1;TRINITY_DN1030_c0_g1;TRINITY_DN1348_c0_g1;TRINITY_DN1486_c0_g2;TRINITY_DN1523_c0_g1;TRINITY_DN1632_c1_g1;TRINITY_DN1687_c0_g1;TRINITY_DN1871_c0_g1;TRINITY_DN2049_c0_g2;TRINITY_DN2229_c1_g1;TRINITY_DN26…
intercellular bridge	cellular_component	GO:0045171	100	TRINITY_DN93_c0_g1;TRINITY_DN183_c1_g1;TRINITY_DN314_c0_g1;TRINITY_DN496_c1_g1;TRINITY_DN665_c0_g3;TRINITY_DN730_c0_g1;TRINITY_DN1026_c0_g1;TRINITY_DN1158_c0_g2;TRINITY_DN1304_c7_g1;TRINITY_DN1559_c1_g2;TRINITY_DN1512_c0_g1;TRINITY_DN1768_c2_g1;TRINITY_DN1809_c5_g1;TRINITY_DN1982_c2_g1;TRINITY_DN2080_c4_g1;TRINITY_DN2173_c0_g1;TRINITY_DN2215_c2_g1;TRINITY_DN2473_c0_g1;TRINITY_DN2496_c0_g1;TRINITY…
neuromuscular process controlling balance	biological_process	GO:0050885	100	TRINITY_DN231_c0_g1;TRINITY_DN387_c4_g1;TRINITY_DN367_c0_g1;TRINITY_DN365_c0_g1;TRINITY_DN558_c5_g1;TRINITY_DN708_c0_g1;TRINITY_DN739_c0_g1;TRINITY_DN739_c1_g1;TRINITY_DN791_c0_g1;TRINITY_DN951_c0_g1;TRINITY_DN1003_c1_g1;TRINITY_DN1116_c4_g1;TRINITY_DN1182_c3_g1;TRINITY_DN1151_c3_g2;TRINITY_DN1212_c4_g1;TRINITY_DN1355_c1_g1;TRINITY_DN1797_c0_g1;TRINITY_DN1808_c2_g1;TRINITY_DN2045_c4_g1;TRINITY_DN…
regulation of growth	biological_process	GO:0040008	100	TRINITY_DN97_c0_g1;TRINITY_DN50_c2_g1;TRINITY_DN10_c3_g1;TRINITY_DN8_c1_g1;TRINITY_DN25_c0_g1;TRINITY_DN352_c4_g1;TRINITY_DN316_c2_g1;TRINITY_DN454_c0_g1;TRINITY_DN582_c1_g1;TRINITY_DN545_c0_g1;TRINITY_DN643_c1_g1;TRINITY_DN634_c1_g1;TRINITY_DN612_c0_g1;TRINITY_DN718_c0_g2;TRINITY_DN746_c1_g2;TRINITY_DN878_c0_g1;TRINITY_DN1118_c1_g1;TRINITY_DN1195_c0_g1;TRINITY_DN1222_c0_g1;TRINITY_DN1251_c1_g1;T…
regulation of translational initiation	biological_process	GO:0006446	99	TRINITY_DN93_c1_g1;TRINITY_DN186_c1_g1;TRINITY_DN209_c0_g2;TRINITY_DN251_c1_g3;TRINITY_DN466_c2_g1;TRINITY_DN569_c0_g1;TRINITY_DN628_c0_g1;TRINITY_DN722_c0_g1;TRINITY_DN928_c0_g1;TRINITY_DN928_c0_g2;TRINITY_DN913_c6_g1;TRINITY_DN1093_c0_g1;TRINITY_DN1093_c0_g2;TRINITY_DN1015_c1_g1;TRINITY_DN1253_c1_g1;TRINITY_DN1560_c0_g3;TRINITY_DN1659_c0_g1;TRINITY_DN1735_c5_g1;TRINITY_DN1890_c0_g1;TRINITY_DN19…
positive regulation of catalytic activity	biological_process	GO:0043085	99	TRINITY_DN115_c1_g3;TRINITY_DN252_c0_g2;TRINITY_DN253_c0_g1;TRINITY_DN277_c0_g1;TRINITY_DN352_c4_g1;TRINITY_DN306_c1_g1;TRINITY_DN494_c2_g2;TRINITY_DN522_c0_g1;TRINITY_DN665_c0_g1;TRINITY_DN790_c0_g1;TRINITY_DN716_c0_g1;TRINITY_DN894_c0_g2;TRINITY_DN958_c0_g2;TRINITY_DN958_c0_g3;TRINITY_DN1002_c1_g1;TRINITY_DN1122_c0_g5;TRINITY_DN1155_c1_g1;TRINITY_DN1719_c1_g3;TRINITY_DN2191_c6_g1;TRINITY_DN2240…
fatty acid biosynthetic process	biological_process	GO:0006633	99	TRINITY_DN436_c0_g1;TRINITY_DN436_c0_g2;TRINITY_DN674_c0_g1;TRINITY_DN664_c0_g3;TRINITY_DN1023_c0_g2;TRINITY_DN1212_c0_g2;TRINITY_DN1476_c7_g1;TRINITY_DN1484_c0_g1;TRINITY_DN1510_c0_g1;TRINITY_DN1522_c0_g2;TRINITY_DN1856_c4_g1;TRINITY_DN1856_c1_g1;TRINITY_DN1946_c2_g1;TRINITY_DN2389_c0_g1;TRINITY_DN2326_c0_g1;TRINITY_DN2367_c1_g2;TRINITY_DN2346_c0_g1;TRINITY_DN2537_c4_g1;TRINITY_DN2776_c0_g1;TRIN…
negative regulation of catalytic activity	biological_process	GO:0043086	99	TRINITY_DN1_c0_g1;TRINITY_DN235_c1_g1;TRINITY_DN397_c0_g1;TRINITY_DN436_c0_g2;TRINITY_DN404_c0_g1;TRINITY_DN586_c1_g1;TRINITY_DN708_c0_g1;TRINITY_DN845_c0_g1;TRINITY_DN1476_c7_g1;TRINITY_DN1420_c2_g1;TRINITY_DN1528_c1_g1;TRINITY_DN1686_c0_g1;TRINITY_DN1998_c0_g1;TRINITY_DN1979_c2_g1;TRINITY_DN1970_c0_g1;TRINITY_DN1970_c0_g2;TRINITY_DN1902_c2_g1;TRINITY_DN2817_c0_g1;TRINITY_DN3337_c0_g1;TRINITY_DN…
cell growth	biological_process	GO:0016049	99	TRINITY_DN157_c0_g1;TRINITY_DN156_c1_g2;TRINITY_DN379_c2_g2;TRINITY_DN525_c0_g1;TRINITY_DN959_c0_g1;TRINITY_DN913_c13_g1;TRINITY_DN1038_c0_g1;TRINITY_DN1080_c2_g1;TRINITY_DN1378_c0_g1;TRINITY_DN1508_c0_g1;TRINITY_DN1636_c0_g2;TRINITY_DN1812_c2_g2;TRINITY_DN1812_c2_g1;TRINITY_DN2086_c1_g1;TRINITY_DN2139_c1_g1;TRINITY_DN2191_c6_g1;TRINITY_DN2273_c1_g1;TRINITY_DN2665_c3_g1;TRINITY_DN2759_c2_g1;TRINI…
anatomical structure morphogenesis	biological_process	GO:0009653	99	TRINITY_DN92_c0_g1;TRINITY_DN296_c0_g1;TRINITY_DN450_c0_g1;TRINITY_DN450_c0_g2;TRINITY_DN450_c0_g3;TRINITY_DN892_c0_g1;TRINITY_DN1041_c1_g1;TRINITY_DN1065_c2_g1;TRINITY_DN1164_c0_g1;TRINITY_DN1306_c1_g1;TRINITY_DN1575_c0_g1;TRINITY_DN1541_c0_g2;TRINITY_DN1608_c0_g2;TRINITY_DN1709_c0_g1;TRINITY_DN2063_c0_g1;TRINITY_DN2063_c0_g2;TRINITY_DN2258_c2_g1;TRINITY_DN2396_c0_g1;TRINITY_DN2396_c0_g2;TRINITY…
cellular response to glucose stimulus	biological_process	GO:0071333	99	TRINITY_DN70_c0_g2;TRINITY_DN13_c0_g2;TRINITY_DN189_c1_g1;TRINITY_DN234_c1_g1;TRINITY_DN277_c0_g1;TRINITY_DN277_c0_g2;TRINITY_DN319_c0_g1;TRINITY_DN477_c0_g3;TRINITY_DN486_c1_g1;TRINITY_DN546_c0_g1;TRINITY_DN510_c0_g2;TRINITY_DN679_c1_g1;TRINITY_DN783_c2_g1;TRINITY_DN906_c2_g1;TRINITY_DN1174_c0_g1;TRINITY_DN1182_c0_g1;TRINITY_DN1225_c0_g1;TRINITY_DN1282_c11_g1;TRINITY_DN1311_c0_g1;TRINITY_DN1308_…
RNA polymerase II distal enhancer sequence-specific DNA binding	molecular_function	GO:0000980	99	TRINITY_DN62_c0_g1;TRINITY_DN11_c0_g1;TRINITY_DN206_c0_g1;TRINITY_DN460_c0_g1;TRINITY_DN404_c0_g1;TRINITY_DN528_c0_g1;TRINITY_DN545_c0_g1;TRINITY_DN515_c1_g1;TRINITY_DN520_c1_g1;TRINITY_DN1095_c1_g1;TRINITY_DN1222_c1_g1;TRINITY_DN1357_c0_g1;TRINITY_DN1499_c0_g1;TRINITY_DN1499_c0_g2;TRINITY_DN1756_c0_g1;TRINITY_DN1777_c3_g3;TRINITY_DN1777_c3_g2;TRINITY_DN1823_c0_g1;TRINITY_DN1823_c0_g2;TRINITY_DN2…
response to wounding	biological_process	GO:0009611	98	TRINITY_DN41_c0_g2;TRINITY_DN13_c0_g2;TRINITY_DN291_c0_g1;TRINITY_DN263_c2_g1;TRINITY_DN718_c0_g2;TRINITY_DN1070_c1_g1;TRINITY_DN1149_c1_g1;TRINITY_DN1392_c0_g2;TRINITY_DN1387_c0_g1;TRINITY_DN1434_c1_g1;TRINITY_DN1544_c3_g1;TRINITY_DN1797_c0_g1;TRINITY_DN2011_c1_g1;TRINITY_DN2103_c0_g1;TRINITY_DN2147_c0_g1;TRINITY_DN2123_c2_g1;TRINITY_DN2295_c1_g1;TRINITY_DN2382_c0_g2;TRINITY_DN2541_c0_g1;TRINITY…
transcriptional repressor complex	cellular_component	GO:0017053	98	TRINITY_DN22_c1_g2;TRINITY_DN220_c2_g1;TRINITY_DN329_c0_g1;TRINITY_DN307_c2_g1;TRINITY_DN319_c0_g2;TRINITY_DN306_c1_g1;TRINITY_DN320_c0_g1;TRINITY_DN423_c1_g1;TRINITY_DN508_c0_g3;TRINITY_DN665_c1_g1;TRINITY_DN701_c0_g1;TRINITY_DN746_c0_g1;TRINITY_DN966_c0_g1;TRINITY_DN955_c0_g1;TRINITY_DN961_c0_g1;TRINITY_DN938_c0_g1;TRINITY_DN1260_c0_g1;TRINITY_DN1499_c0_g1;TRINITY_DN1525_c2_g1;TRINITY_DN1690_c0…
viral capsid	cellular_component	GO:0019028	98	TRINITY_DN150_c0_g1;TRINITY_DN244_c5_g1;TRINITY_DN420_c3_g1;TRINITY_DN800_c1_g1;TRINITY_DN918_c0_g1;TRINITY_DN1104_c0_g1;TRINITY_DN1104_c1_g2;TRINITY_DN1150_c1_g3;TRINITY_DN1150_c1_g1;TRINITY_DN1737_c1_g1;TRINITY_DN1834_c0_g1;TRINITY_DN1834_c2_g1;TRINITY_DN1924_c0_g1;TRINITY_DN2134_c0_g1;TRINITY_DN2523_c0_g3;TRINITY_DN2523_c1_g1;TRINITY_DN3059_c0_g1;TRINITY_DN3990_c0_g1;TRINITY_DN4031_c0_g1;TRINI…
transcription elongation from RNA polymerase II promoter	biological_process	GO:0006368	98	TRINITY_DN55_c3_g2;TRINITY_DN37_c0_g1;TRINITY_DN238_c0_g1;TRINITY_DN378_c1_g1;TRINITY_DN471_c0_g1;TRINITY_DN890_c0_g1;TRINITY_DN890_c0_g3;TRINITY_DN1014_c0_g1;TRINITY_DN1156_c2_g1;TRINITY_DN1306_c2_g1;TRINITY_DN1362_c0_g1;TRINITY_DN1478_c0_g2;TRINITY_DN1535_c1_g2;TRINITY_DN1777_c3_g4;TRINITY_DN1851_c0_g1;TRINITY_DN2330_c6_g1;TRINITY_DN2436_c0_g1;TRINITY_DN2516_c0_g1;TRINITY_DN2762_c1_g1;TRINITY_D…
axon terminus	cellular_component	GO:0043679	98	TRINITY_DN10_c1_g1;TRINITY_DN76_c0_g1;TRINITY_DN124_c0_g1;TRINITY_DN234_c0_g1;TRINITY_DN234_c0_g2;TRINITY_DN512_c0_g4;TRINITY_DN783_c2_g1;TRINITY_DN885_c0_g2;TRINITY_DN931_c3_g1;TRINITY_DN1167_c1_g1;TRINITY_DN1308_c0_g2;TRINITY_DN1814_c0_g1;TRINITY_DN1970_c0_g1;TRINITY_DN1970_c0_g2;TRINITY_DN2077_c0_g1;TRINITY_DN2147_c0_g1;TRINITY_DN2123_c1_g1;TRINITY_DN2281_c2_g1;TRINITY_DN2244_c1_g1;TRINITY_DN2…
cellular response to retinoic acid	biological_process	GO:0071300	98	TRINITY_DN93_c0_g1;TRINITY_DN200_c0_g1;TRINITY_DN235_c0_g4;TRINITY_DN277_c0_g1;TRINITY_DN387_c4_g1;TRINITY_DN307_c2_g1;TRINITY_DN372_c2_g1;TRINITY_DN434_c0_g2;TRINITY_DN541_c2_g1;TRINITY_DN520_c3_g1;TRINITY_DN572_c1_g1;TRINITY_DN756_c0_g1;TRINITY_DN880_c1_g1;TRINITY_DN823_c0_g1;TRINITY_DN849_c0_g2;TRINITY_DN849_c0_g3;TRINITY_DN1289_c0_g1;TRINITY_DN1283_c3_g2;TRINITY_DN1447_c5_g1;TRINITY_DN1473_c1…
autophagosome	cellular_component	GO:0005776	98	TRINITY_DN238_c1_g1;TRINITY_DN270_c0_g1;TRINITY_DN493_c0_g1;TRINITY_DN595_c1_g1;TRINITY_DN681_c0_g1;TRINITY_DN640_c0_g2;TRINITY_DN662_c0_g1;TRINITY_DN632_c1_g1;TRINITY_DN615_c0_g1;TRINITY_DN708_c0_g1;TRINITY_DN723_c1_g3;TRINITY_DN723_c1_g2;TRINITY_DN825_c1_g1;TRINITY_DN828_c1_g1;TRINITY_DN828_c5_g2;TRINITY_DN923_c2_g1;TRINITY_DN1012_c0_g1;TRINITY_DN1065_c0_g1;TRINITY_DN1065_c0_g2;TRINITY_DN1060_c…
cysteine-type peptidase activity	molecular_function	GO:0008234	98	TRINITY_DN76_c0_g4;TRINITY_DN291_c0_g1;TRINITY_DN482_c1_g4;TRINITY_DN635_c0_g1;TRINITY_DN693_c0_g1;TRINITY_DN751_c1_g1;TRINITY_DN714_c1_g1;TRINITY_DN1068_c1_g2;TRINITY_DN1160_c0_g2;TRINITY_DN1155_c1_g1;TRINITY_DN1119_c0_g1;TRINITY_DN1316_c0_g1;TRINITY_DN1487_c0_g1;TRINITY_DN1746_c0_g1;TRINITY_DN1900_c0_g3;TRINITY_DN2164_c1_g1;TRINITY_DN2666_c6_g1;TRINITY_DN2702_c0_g1;TRINITY_DN2702_c0_g2;TRINITY_…
cellular response to oxidative stress	biological_process	GO:0034599	97	TRINITY_DN210_c0_g1;TRINITY_DN233_c0_g1;TRINITY_DN380_c1_g2;TRINITY_DN494_c9_g1;TRINITY_DN596_c16_g1;TRINITY_DN543_c1_g1;TRINITY_DN515_c1_g1;TRINITY_DN603_c2_g2;TRINITY_DN603_c2_g1;TRINITY_DN751_c0_g1;TRINITY_DN809_c0_g1;TRINITY_DN989_c1_g1;TRINITY_DN1534_c0_g1;TRINITY_DN1621_c1_g1;TRINITY_DN1636_c0_g2;TRINITY_DN1754_c0_g1;TRINITY_DN1719_c0_g1;TRINITY_DN2045_c4_g1;TRINITY_DN2083_c0_g1;TRINITY_DN2…
nucleosome assembly	biological_process	GO:0006334	97	TRINITY_DN125_c1_g1;TRINITY_DN319_c2_g1;TRINITY_DN338_c1_g1;TRINITY_DN420_c0_g1;TRINITY_DN525_c0_g1;TRINITY_DN585_c0_g1;TRINITY_DN554_c0_g1;TRINITY_DN591_c1_g1;TRINITY_DN586_c1_g1;TRINITY_DN680_c0_g1;TRINITY_DN832_c1_g1;TRINITY_DN976_c0_g2;TRINITY_DN906_c0_g1;TRINITY_DN1054_c0_g1;TRINITY_DN1473_c1_g2;TRINITY_DN1539_c0_g2;TRINITY_DN1512_c1_g2;TRINITY_DN2003_c2_g1;TRINITY_DN2392_c0_g1;TRINITY_DN272…
viral release from host cell	biological_process	GO:0019076	97	TRINITY_DN150_c0_g1;TRINITY_DN350_c0_g1;TRINITY_DN918_c0_g1;TRINITY_DN1058_c6_g1;TRINITY_DN1104_c1_g4;TRINITY_DN1597_c1_g1;TRINITY_DN1665_c0_g2;TRINITY_DN2081_c0_g1;TRINITY_DN2134_c0_g1;TRINITY_DN2392_c0_g1;TRINITY_DN2564_c1_g1;TRINITY_DN2873_c1_g1;TRINITY_DN3332_c1_g1;TRINITY_DN3403_c0_g1;TRINITY_DN4443_c0_g1;TRINITY_DN5226_c0_g1;TRINITY_DN6339_c0_g2;TRINITY_DN6553_c0_g1;TRINITY_DN8464_c0_g1;TRI…
embryonic limb morphogenesis	biological_process	GO:0030326	97	TRINITY_DN86_c3_g1;TRINITY_DN86_c3_g3;TRINITY_DN86_c3_g4;TRINITY_DN8_c1_g1;TRINITY_DN14_c0_g2;TRINITY_DN217_c0_g3;TRINITY_DN494_c2_g2;TRINITY_DN546_c1_g1;TRINITY_DN541_c1_g1;TRINITY_DN834_c0_g2;TRINITY_DN1145_c0_g1;TRINITY_DN1285_c3_g1;TRINITY_DN1378_c0_g1;TRINITY_DN1437_c0_g1;TRINITY_DN1517_c0_g1;TRINITY_DN1604_c0_g1;TRINITY_DN1828_c4_g2;TRINITY_DN2029_c4_g1;TRINITY_DN2110_c1_g1;TRINITY_DN2167_c…
adherens junction	cellular_component	GO:0005912	97	TRINITY_DN293_c0_g1;TRINITY_DN337_c0_g1;TRINITY_DN337_c0_g2;TRINITY_DN337_c0_g3;TRINITY_DN336_c0_g1;TRINITY_DN372_c13_g1;TRINITY_DN441_c2_g2;TRINITY_DN441_c2_g1;TRINITY_DN545_c0_g1;TRINITY_DN705_c0_g1;TRINITY_DN739_c5_g1;TRINITY_DN712_c9_g1;TRINITY_DN978_c0_g1;TRINITY_DN978_c0_g2;TRINITY_DN1647_c0_g1;TRINITY_DN1670_c2_g1;TRINITY_DN1697_c0_g2;TRINITY_DN1765_c0_g1;TRINITY_DN1843_c0_g1;TRINITY_DN186…
antigen processing and presentation of exogenous peptide antigen via MHC class II	biological_process	GO:0019886	97	TRINITY_DN50_c1_g1;TRINITY_DN40_c0_g1;TRINITY_DN159_c0_g1;TRINITY_DN339_c1_g1;TRINITY_DN919_c0_g1;TRINITY_DN1170_c1_g1;TRINITY_DN1119_c0_g1;TRINITY_DN1281_c0_g1;TRINITY_DN1496_c0_g1;TRINITY_DN1496_c0_g2;TRINITY_DN1639_c1_g1;TRINITY_DN1606_c0_g1;TRINITY_DN1606_c0_g2;TRINITY_DN1820_c1_g1;TRINITY_DN1827_c0_g1;TRINITY_DN2022_c0_g1;TRINITY_DN2206_c0_g1;TRINITY_DN2206_c0_g2;TRINITY_DN2240_c3_g1;TRINITY…
motile cilium	cellular_component	GO:0031514	97	TRINITY_DN23_c1_g1;TRINITY_DN389_c0_g1;TRINITY_DN414_c1_g1;TRINITY_DN789_c0_g1;TRINITY_DN744_c0_g1;TRINITY_DN908_c0_g1;TRINITY_DN1145_c0_g1;TRINITY_DN1521_c0_g1;TRINITY_DN1639_c1_g1;TRINITY_DN1738_c0_g1;TRINITY_DN1862_c2_g1;TRINITY_DN1910_c0_g2;TRINITY_DN2397_c1_g1;TRINITY_DN2443_c0_g1;TRINITY_DN2544_c0_g1;TRINITY_DN2835_c0_g1;TRINITY_DN2926_c2_g1;TRINITY_DN4024_c0_g1;TRINITY_DN4196_c3_g1;TRINITY…
positive regulation of smooth muscle cell proliferation	biological_process	GO:0048661	97	TRINITY_DN25_c0_g1;TRINITY_DN189_c1_g1;TRINITY_DN124_c0_g1;TRINITY_DN583_c0_g1;TRINITY_DN512_c0_g2;TRINITY_DN770_c0_g1;TRINITY_DN1065_c2_g1;TRINITY_DN1094_c1_g1;TRINITY_DN1243_c0_g1;TRINITY_DN1452_c0_g1;TRINITY_DN1437_c0_g1;TRINITY_DN1590_c0_g3;TRINITY_DN1561_c0_g1;TRINITY_DN1541_c0_g3;TRINITY_DN1632_c1_g1;TRINITY_DN1687_c0_g1;TRINITY_DN1753_c0_g1;TRINITY_DN1814_c0_g1;TRINITY_DN1905_c2_g1;TRINITY…
transcription-coupled nucleotide-excision repair	biological_process	GO:0006283	97	TRINITY_DN55_c3_g2;TRINITY_DN165_c1_g2;TRINITY_DN267_c0_g1;TRINITY_DN402_c1_g1;TRINITY_DN607_c0_g1;TRINITY_DN764_c3_g1;TRINITY_DN864_c2_g1;TRINITY_DN890_c0_g1;TRINITY_DN890_c0_g3;TRINITY_DN1014_c0_g1;TRINITY_DN1156_c2_g1;TRINITY_DN1578_c0_g1;TRINITY_DN1709_c0_g1;TRINITY_DN1851_c0_g1;TRINITY_DN1931_c0_g1;TRINITY_DN1910_c0_g2;TRINITY_DN2181_c1_g1;TRINITY_DN2251_c1_g2;TRINITY_DN2430_c1_g1;TRINITY_DN…
positive regulation of translation	biological_process	GO:0045727	97	TRINITY_DN165_c0_g2;TRINITY_DN354_c6_g1;TRINITY_DN525_c0_g1;TRINITY_DN525_c0_g3;TRINITY_DN510_c0_g2;TRINITY_DN678_c3_g1;TRINITY_DN663_c1_g1;TRINITY_DN857_c0_g1;TRINITY_DN936_c1_g1;TRINITY_DN1044_c0_g1;TRINITY_DN1268_c0_g1;TRINITY_DN1287_c2_g1;TRINITY_DN1328_c3_g1;TRINITY_DN1368_c1_g1;TRINITY_DN1473_c0_g1;TRINITY_DN1579_c0_g1;TRINITY_DN1512_c0_g1;TRINITY_DN1721_c0_g1;TRINITY_DN1814_c0_g1;TRINITY_D…
protein localization to plasma membrane	biological_process	GO:0072659	96	TRINITY_DN188_c1_g1;TRINITY_DN378_c2_g1;TRINITY_DN569_c7_g1;TRINITY_DN527_c0_g1;TRINITY_DN527_c0_g2;TRINITY_DN708_c0_g1;TRINITY_DN742_c2_g1;TRINITY_DN944_c0_g2;TRINITY_DN1083_c2_g1;TRINITY_DN1070_c2_g3;TRINITY_DN1024_c1_g1;TRINITY_DN1107_c1_g2;TRINITY_DN1212_c2_g1;TRINITY_DN1390_c2_g4;TRINITY_DN1384_c0_g1;TRINITY_DN1347_c1_g1;TRINITY_DN1474_c5_g1;TRINITY_DN1618_c0_g1;TRINITY_DN1827_c3_g1;TRINITY_…
odontogenesis of dentin-containing tooth	biological_process	GO:0042475	96	TRINITY_DN153_c1_g1;TRINITY_DN165_c1_g4;TRINITY_DN264_c1_g1;TRINITY_DN307_c2_g1;TRINITY_DN342_c0_g1;TRINITY_DN332_c4_g2;TRINITY_DN498_c0_g1;TRINITY_DN471_c0_g1;TRINITY_DN512_c0_g2;TRINITY_DN675_c4_g1;TRINITY_DN895_c0_g1;TRINITY_DN1041_c0_g1;TRINITY_DN1499_c0_g1;TRINITY_DN1541_c0_g2;TRINITY_DN1828_c4_g2;TRINITY_DN1814_c2_g1;TRINITY_DN2167_c0_g2;TRINITY_DN2102_c0_g1;TRINITY_DN3101_c0_g1;TRINITY_DN3…
chromatin DNA binding	molecular_function	GO:0031490	96	TRINITY_DN38_c1_g1;TRINITY_DN151_c6_g1;TRINITY_DN165_c1_g2;TRINITY_DN178_c1_g1;TRINITY_DN329_c0_g1;TRINITY_DN307_c2_g1;TRINITY_DN319_c0_g2;TRINITY_DN481_c1_g4;TRINITY_DN465_c0_g1;TRINITY_DN834_c0_g1;TRINITY_DN901_c8_g1;TRINITY_DN1146_c0_g4;TRINITY_DN1102_c0_g2;TRINITY_DN1288_c15_g1;TRINITY_DN1200_c2_g1;TRINITY_DN1340_c0_g1;TRINITY_DN1340_c0_g2;TRINITY_DN1340_c0_g3;TRINITY_DN1506_c0_g1;TRINITY_DN1…
aminopeptidase activity	molecular_function	GO:0004177	96	TRINITY_DN143_c1_g2;TRINITY_DN395_c0_g2;TRINITY_DN395_c0_g3;TRINITY_DN469_c0_g1;TRINITY_DN530_c1_g2;TRINITY_DN693_c0_g1;TRINITY_DN920_c0_g1;TRINITY_DN954_c0_g2;TRINITY_DN1147_c0_g1;TRINITY_DN1297_c0_g1;TRINITY_DN1302_c0_g4;TRINITY_DN1302_c0_g2;TRINITY_DN1457_c1_g1;TRINITY_DN1642_c0_g1;TRINITY_DN2062_c1_g1;TRINITY_DN2036_c0_g1;TRINITY_DN2114_c1_g1;TRINITY_DN2227_c1_g1;TRINITY_DN2459_c1_g1;TRINITY_…
photoreceptor cell maintenance	biological_process	GO:0045494	96	TRINITY_DN21_c0_g3;TRINITY_DN159_c0_g2;TRINITY_DN392_c1_g1;TRINITY_DN402_c1_g1;TRINITY_DN546_c2_g1;TRINITY_DN552_c3_g1;TRINITY_DN665_c0_g3;TRINITY_DN742_c2_g1;TRINITY_DN872_c0_g1;TRINITY_DN941_c0_g1;TRINITY_DN1334_c0_g1;TRINITY_DN1559_c1_g2;TRINITY_DN1752_c1_g1;TRINITY_DN1880_c1_g1;TRINITY_DN2244_c1_g1;TRINITY_DN2429_c0_g1;TRINITY_DN2443_c0_g1;TRINITY_DN2626_c0_g1;TRINITY_DN2694_c7_g1;TRINITY_DN2…
cellular response to amino acid stimulus	biological_process	GO:0071230	96	TRINITY_DN189_c1_g1;TRINITY_DN165_c0_g2;TRINITY_DN172_c1_g2;TRINITY_DN182_c0_g1;TRINITY_DN265_c0_g1;TRINITY_DN578_c0_g1;TRINITY_DN678_c3_g1;TRINITY_DN821_c0_g1;TRINITY_DN901_c2_g1;TRINITY_DN921_c0_g2;TRINITY_DN918_c0_g1;TRINITY_DN1062_c0_g1;TRINITY_DN1084_c1_g1;TRINITY_DN1308_c0_g2;TRINITY_DN1328_c6_g1;TRINITY_DN1420_c0_g2;TRINITY_DN1508_c0_g1;TRINITY_DN1541_c0_g2;TRINITY_DN1647_c4_g1;TRINITY_DN1…
response to retinoic acid	biological_process	GO:0032526	96	TRINITY_DN8_c1_g1;TRINITY_DN113_c1_g1;TRINITY_DN378_c2_g1;TRINITY_DN499_c0_g1;TRINITY_DN458_c0_g1;TRINITY_DN494_c0_g2;TRINITY_DN582_c0_g2;TRINITY_DN520_c3_g1;TRINITY_DN641_c0_g2;TRINITY_DN1084_c1_g1;TRINITY_DN1205_c0_g1;TRINITY_DN1486_c0_g2;TRINITY_DN1590_c0_g3;TRINITY_DN1599_c0_g1;TRINITY_DN1541_c0_g3;TRINITY_DN1527_c1_g1;TRINITY_DN1635_c0_g1;TRINITY_DN1769_c0_g1;TRINITY_DN1754_c0_g1;TRINITY_DN1…
synaptic vesicle membrane	cellular_component	GO:0030672	96	TRINITY_DN114_c0_g1;TRINITY_DN136_c0_g1;TRINITY_DN214_c0_g2;TRINITY_DN254_c0_g1;TRINITY_DN878_c0_g1;TRINITY_DN926_c0_g1;TRINITY_DN913_c2_g1;TRINITY_DN1066_c0_g1;TRINITY_DN1264_c4_g1;TRINITY_DN2008_c1_g1;TRINITY_DN2158_c1_g1;TRINITY_DN2323_c0_g1;TRINITY_DN2439_c0_g2;TRINITY_DN2488_c4_g1;TRINITY_DN2554_c0_g1;TRINITY_DN2846_c0_g1;TRINITY_DN2907_c0_g1;TRINITY_DN3054_c1_g3;TRINITY_DN3347_c1_g1;TRINITY…
positive regulation of endothelial cell proliferation	biological_process	GO:0001938	95	TRINITY_DN86_c3_g2;TRINITY_DN189_c1_g1;TRINITY_DN217_c0_g3;TRINITY_DN229_c0_g1;TRINITY_DN465_c2_g2;TRINITY_DN465_c2_g1;TRINITY_DN421_c0_g1;TRINITY_DN512_c0_g2;TRINITY_DN756_c0_g2;TRINITY_DN944_c0_g1;TRINITY_DN1078_c1_g3;TRINITY_DN1078_c1_g2;TRINITY_DN1237_c0_g1;TRINITY_DN1367_c0_g1;TRINITY_DN1367_c0_g3;TRINITY_DN1363_c1_g1;TRINITY_DN1423_c0_g1;TRINITY_DN1486_c0_g2;TRINITY_DN1506_c4_g1;TRINITY_DN1…
calcium-dependent phospholipid binding	molecular_function	GO:0005544	95	TRINITY_DN5_c0_g1;TRINITY_DN78_c12_g1;TRINITY_DN136_c0_g1;TRINITY_DN484_c1_g1;TRINITY_DN468_c0_g1;TRINITY_DN468_c0_g2;TRINITY_DN468_c0_g3;TRINITY_DN677_c1_g1;TRINITY_DN908_c0_g1;TRINITY_DN1167_c0_g1;TRINITY_DN1345_c1_g1;TRINITY_DN1528_c1_g1;TRINITY_DN1528_c1_g4;TRINITY_DN1714_c2_g1;TRINITY_DN1790_c1_g1;TRINITY_DN1728_c0_g1;TRINITY_DN2490_c5_g1;TRINITY_DN2620_c0_g1;TRINITY_DN2620_c0_g3;TRINITY_DN2…
vasculogenesis	biological_process	GO:0001570	95	TRINITY_DN269_c0_g1;TRINITY_DN392_c0_g1;TRINITY_DN458_c0_g1;TRINITY_DN551_c1_g1;TRINITY_DN512_c0_g1;TRINITY_DN582_c3_g1;TRINITY_DN521_c0_g1;TRINITY_DN561_c1_g1;TRINITY_DN638_c1_g1;TRINITY_DN709_c1_g1;TRINITY_DN899_c0_g1;TRINITY_DN849_c0_g2;TRINITY_DN849_c0_g3;TRINITY_DN1078_c1_g3;TRINITY_DN1078_c1_g2;TRINITY_DN1367_c0_g1;TRINITY_DN1367_c0_g3;TRINITY_DN1323_c0_g2;TRINITY_DN1389_c0_g1;TRINITY_DN135…
fatty acid beta-oxidation	biological_process	GO:0006635	94	TRINITY_DN123_c0_g1;TRINITY_DN665_c3_g1;TRINITY_DN761_c0_g1;TRINITY_DN847_c0_g1;TRINITY_DN824_c0_g1;TRINITY_DN985_c2_g1;TRINITY_DN1070_c2_g3;TRINITY_DN1390_c1_g1;TRINITY_DN1482_c0_g1;TRINITY_DN1613_c0_g1;TRINITY_DN1691_c3_g1;TRINITY_DN1691_c3_g2;TRINITY_DN1834_c1_g1;TRINITY_DN1905_c2_g1;TRINITY_DN1928_c5_g1;TRINITY_DN2085_c0_g1;TRINITY_DN2173_c1_g1;TRINITY_DN2164_c3_g1;TRINITY_DN2326_c0_g1;TRINIT…
presynaptic membrane	cellular_component	GO:0042734	94	TRINITY_DN21_c0_g1;TRINITY_DN48_c1_g1;TRINITY_DN151_c2_g3;TRINITY_DN172_c0_g1;TRINITY_DN299_c0_g1;TRINITY_DN312_c1_g2;TRINITY_DN312_c1_g1;TRINITY_DN760_c0_g1;TRINITY_DN1306_c3_g1;TRINITY_DN1458_c0_g1;TRINITY_DN1814_c1_g2;TRINITY_DN2480_c9_g1;TRINITY_DN2439_c0_g2;TRINITY_DN2830_c0_g1;TRINITY_DN3290_c0_g1;TRINITY_DN3290_c0_g3;TRINITY_DN3357_c1_g2;TRINITY_DN3848_c0_g1;TRINITY_DN4463_c1_g1;TRINITY_DN…
cellular response to cAMP	biological_process	GO:0071320	94	TRINITY_DN38_c1_g1;TRINITY_DN319_c0_g2;TRINITY_DN371_c0_g1;TRINITY_DN665_c6_g1;TRINITY_DN770_c0_g1;TRINITY_DN1070_c2_g3;TRINITY_DN1264_c3_g1;TRINITY_DN1264_c5_g2;TRINITY_DN1345_c2_g1;TRINITY_DN1537_c0_g3;TRINITY_DN1973_c0_g1;TRINITY_DN1973_c0_g2;TRINITY_DN1905_c2_g2;TRINITY_DN2077_c0_g1;TRINITY_DN2025_c0_g1;TRINITY_DN2642_c3_g1;TRINITY_DN3077_c0_g1;TRINITY_DN3199_c1_g1;TRINITY_DN3358_c0_g2;TRINIT…
brush border membrane	cellular_component	GO:0031526	94	TRINITY_DN22_c0_g5;TRINITY_DN251_c9_g1;TRINITY_DN315_c0_g2;TRINITY_DN580_c0_g1;TRINITY_DN775_c0_g1;TRINITY_DN809_c0_g1;TRINITY_DN837_c3_g2;TRINITY_DN1169_c0_g1;TRINITY_DN1267_c0_g1;TRINITY_DN1382_c2_g1;TRINITY_DN1701_c0_g1;TRINITY_DN1880_c2_g1;TRINITY_DN1858_c0_g1;TRINITY_DN1858_c6_g1;TRINITY_DN1826_c0_g1;TRINITY_DN2065_c1_g1;TRINITY_DN2077_c0_g1;TRINITY_DN2049_c0_g1;TRINITY_DN2025_c0_g1;TRINITY_…
regulation of blood pressure	biological_process	GO:0008217	94	TRINITY_DN271_c0_g1;TRINITY_DN452_c1_g1;TRINITY_DN496_c1_g1;TRINITY_DN578_c0_g1;TRINITY_DN530_c1_g2;TRINITY_DN734_c0_g1;TRINITY_DN850_c0_g1;TRINITY_DN935_c2_g1;TRINITY_DN966_c1_g1;TRINITY_DN1361_c0_g1;TRINITY_DN1921_c0_g3;TRINITY_DN2168_c4_g1;TRINITY_DN2168_c4_g4;TRINITY_DN2148_c5_g1;TRINITY_DN2459_c1_g1;TRINITY_DN2640_c3_g1;TRINITY_DN2675_c0_g1;TRINITY_DN2624_c0_g4;TRINITY_DN2624_c0_g1;TRINITY_D…
transferase activity	molecular_function	GO:0016740	94	TRINITY_DN29_c3_g1;TRINITY_DN95_c0_g1;TRINITY_DN328_c2_g2;TRINITY_DN415_c2_g2;TRINITY_DN579_c0_g3;TRINITY_DN664_c0_g3;TRINITY_DN1315_c11_g1;TRINITY_DN1944_c0_g1;TRINITY_DN2003_c11_g1;TRINITY_DN2325_c0_g1;TRINITY_DN2402_c0_g1;TRINITY_DN2871_c0_g1;TRINITY_DN2962_c4_g2;TRINITY_DN3219_c1_g1;TRINITY_DN4007_c0_g1;TRINITY_DN4268_c0_g1;TRINITY_DN4321_c1_g1;TRINITY_DN4963_c0_g1;TRINITY_DN5053_c1_g1;TRINIT…
chloride transmembrane transport	biological_process	GO:1902476	94	TRINITY_DN103_c1_g1;TRINITY_DN867_c0_g1;TRINITY_DN928_c0_g3;TRINITY_DN1170_c0_g1;TRINITY_DN1308_c0_g1;TRINITY_DN1671_c0_g1;TRINITY_DN1671_c0_g2;TRINITY_DN1828_c5_g1;TRINITY_DN1852_c2_g1;TRINITY_DN1952_c0_g1;TRINITY_DN1910_c0_g1;TRINITY_DN2018_c6_g2;TRINITY_DN2061_c0_g1;TRINITY_DN2061_c0_g2;TRINITY_DN2025_c0_g1;TRINITY_DN2244_c1_g1;TRINITY_DN2267_c0_g1;TRINITY_DN2316_c0_g3;TRINITY_DN3256_c0_g1;TRI…
learning	biological_process	GO:0007612	94	TRINITY_DN251_c12_g1;TRINITY_DN231_c0_g1;TRINITY_DN387_c4_g1;TRINITY_DN481_c1_g4;TRINITY_DN734_c0_g1;TRINITY_DN863_c0_g1;TRINITY_DN958_c0_g2;TRINITY_DN967_c0_g1;TRINITY_DN1093_c0_g1;TRINITY_DN1093_c0_g2;TRINITY_DN1146_c0_g2;TRINITY_DN1611_c1_g2;TRINITY_DN1608_c0_g2;TRINITY_DN1988_c0_g2;TRINITY_DN2112_c2_g1;TRINITY_DN3212_c1_g1;TRINITY_DN3556_c0_g1;TRINITY_DN3933_c1_g1;TRINITY_DN3991_c0_g1;TRINITY…
glutathione metabolic process	biological_process	GO:0006749	94	TRINITY_DN126_c0_g1;TRINITY_DN243_c0_g1;TRINITY_DN287_c4_g1;TRINITY_DN302_c0_g1;TRINITY_DN566_c0_g2;TRINITY_DN1450_c1_g1;TRINITY_DN2048_c1_g1;TRINITY_DN2098_c4_g1;TRINITY_DN2098_c1_g3;TRINITY_DN2098_c1_g1;TRINITY_DN2193_c0_g1;TRINITY_DN2181_c0_g1;TRINITY_DN2226_c9_g1;TRINITY_DN2245_c0_g2;TRINITY_DN2314_c0_g1;TRINITY_DN2824_c2_g1;TRINITY_DN3147_c0_g1;TRINITY_DN3577_c0_g1;TRINITY_DN3605_c0_g1;TRINI…
phagocytic vesicle membrane	cellular_component	GO:0030670	93	TRINITY_DN83_c1_g1;TRINITY_DN41_c0_g2;TRINITY_DN163_c1_g1;TRINITY_DN691_c0_g1;TRINITY_DN673_c0_g1;TRINITY_DN704_c0_g1;TRINITY_DN775_c0_g2;TRINITY_DN787_c0_g2;TRINITY_DN787_c0_g3;TRINITY_DN1107_c1_g2;TRINITY_DN1167_c0_g1;TRINITY_DN1289_c0_g1;TRINITY_DN1339_c1_g1;TRINITY_DN1723_c0_g2;TRINITY_DN2392_c0_g1;TRINITY_DN2396_c4_g1;TRINITY_DN2396_c14_g1;TRINITY_DN2488_c4_g1;TRINITY_DN2543_c0_g2;TRINITY_DN…
response to peptide hormone	biological_process	GO:0043434	93	TRINITY_DN93_c4_g1;TRINITY_DN31_c1_g1;TRINITY_DN111_c12_g1;TRINITY_DN291_c0_g1;TRINITY_DN452_c0_g1;TRINITY_DN583_c0_g1;TRINITY_DN505_c0_g1;TRINITY_DN770_c0_g1;TRINITY_DN751_c0_g1;TRINITY_DN733_c0_g1;TRINITY_DN943_c0_g1;TRINITY_DN908_c0_g1;TRINITY_DN1267_c0_g1;TRINITY_DN1205_c3_g1;TRINITY_DN1420_c0_g2;TRINITY_DN1781_c1_g1;TRINITY_DN1939_c0_g1;TRINITY_DN1947_c0_g1;TRINITY_DN2062_c1_g1;TRINITY_DN206…
copper ion binding	molecular_function	GO:0005507	93	TRINITY_DN46_c0_g1;TRINITY_DN46_c0_g2;TRINITY_DN291_c0_g1;TRINITY_DN543_c1_g1;TRINITY_DN645_c0_g1;TRINITY_DN645_c0_g2;TRINITY_DN779_c1_g3;TRINITY_DN779_c1_g2;TRINITY_DN809_c0_g1;TRINITY_DN874_c3_g1;TRINITY_DN1329_c0_g1;TRINITY_DN1443_c0_g1;TRINITY_DN1523_c0_g1;TRINITY_DN1516_c0_g1;TRINITY_DN1585_c0_g1;TRINITY_DN1945_c0_g1;TRINITY_DN1921_c0_g3;TRINITY_DN2132_c0_g1;TRINITY_DN2132_c0_g3;TRINITY_DN22…
negative regulation of endopeptidase activity	biological_process	GO:0010951	93	TRINITY_DN229_c0_g1;TRINITY_DN859_c2_g1;TRINITY_DN944_c0_g1;TRINITY_DN1177_c0_g2;TRINITY_DN1372_c7_g1;TRINITY_DN1372_c7_g2;TRINITY_DN1537_c0_g3;TRINITY_DN1616_c0_g2;TRINITY_DN1880_c2_g1;TRINITY_DN1809_c0_g1;TRINITY_DN2173_c0_g1;TRINITY_DN2608_c3_g1;TRINITY_DN2905_c0_g2;TRINITY_DN3077_c0_g1;TRINITY_DN3184_c0_g1;TRINITY_DN3113_c0_g1;TRINITY_DN3325_c2_g1;TRINITY_DN3581_c0_g1;TRINITY_DN3624_c2_g1;TRI…
regulation of mRNA stability	biological_process	GO:0043488	93	TRINITY_DN50_c3_g1;TRINITY_DN38_c1_g1;TRINITY_DN42_c0_g3;TRINITY_DN165_c0_g2;TRINITY_DN396_c2_g2;TRINITY_DN306_c1_g1;TRINITY_DN392_c0_g1;TRINITY_DN405_c0_g2;TRINITY_DN586_c1_g1;TRINITY_DN548_c5_g2;TRINITY_DN678_c3_g1;TRINITY_DN682_c1_g2;TRINITY_DN944_c0_g1;TRINITY_DN1116_c2_g1;TRINITY_DN1107_c0_g1;TRINITY_DN1287_c5_g1;TRINITY_DN1656_c1_g1;TRINITY_DN1719_c0_g1;TRINITY_DN1885_c0_g1;TRINITY_DN1805_c…
defense response to Gram-positive bacterium	biological_process	GO:0050830	93	TRINITY_DN125_c1_g1;TRINITY_DN173_c0_g1;TRINITY_DN173_c6_g1;TRINITY_DN869_c0_g1;TRINITY_DN1049_c0_g1;TRINITY_DN1297_c1_g1;TRINITY_DN1267_c1_g3;TRINITY_DN1675_c0_g1;TRINITY_DN1856_c4_g1;TRINITY_DN1856_c1_g1;TRINITY_DN1905_c2_g1;TRINITY_DN1920_c0_g4;TRINITY_DN1920_c0_g2;TRINITY_DN2240_c4_g1;TRINITY_DN2368_c1_g1;TRINITY_DN2473_c0_g1;TRINITY_DN2517_c0_g1;TRINITY_DN2526_c0_g1;TRINITY_DN2773_c0_g2;TRIN…
ciliary membrane	cellular_component	GO:0060170	93	TRINITY_DN8_c1_g1;TRINITY_DN62_c2_g1;TRINITY_DN146_c1_g1;TRINITY_DN231_c0_g1;TRINITY_DN504_c1_g3;TRINITY_DN504_c1_g1;TRINITY_DN601_c2_g1;TRINITY_DN742_c2_g1;TRINITY_DN744_c0_g1;TRINITY_DN1626_c0_g1;TRINITY_DN1858_c0_g1;TRINITY_DN1858_c6_g1;TRINITY_DN2112_c2_g1;TRINITY_DN2443_c0_g1;TRINITY_DN2852_c0_g1;TRINITY_DN3211_c1_g1;TRINITY_DN3567_c0_g1;TRINITY_DN3567_c0_g2;TRINITY_DN3674_c1_g1;TRINITY_DN38…
cell adhesion molecule binding	molecular_function	GO:0050839	93	TRINITY_DN67_c0_g1;TRINITY_DN172_c0_g1;TRINITY_DN205_c0_g1;TRINITY_DN293_c0_g1;TRINITY_DN545_c0_g1;TRINITY_DN694_c0_g1;TRINITY_DN1033_c0_g1;TRINITY_DN1348_c1_g1;TRINITY_DN1563_c2_g1;TRINITY_DN1775_c0_g2;TRINITY_DN1843_c0_g1;TRINITY_DN1812_c2_g2;TRINITY_DN1812_c2_g1;TRINITY_DN1814_c1_g2;TRINITY_DN1901_c2_g2;TRINITY_DN1957_c0_g1;TRINITY_DN2083_c1_g3;TRINITY_DN2083_c1_g1;TRINITY_DN2199_c1_g2;TRINITY…
lateral plasma membrane	cellular_component	GO:0016328	93	TRINITY_DN110_c0_g1;TRINITY_DN181_c0_g1;TRINITY_DN234_c1_g1;TRINITY_DN373_c0_g1;TRINITY_DN802_c0_g1;TRINITY_DN901_c8_g1;TRINITY_DN908_c0_g1;TRINITY_DN1000_c0_g1;TRINITY_DN1088_c0_g1;TRINITY_DN1005_c1_g1;TRINITY_DN1018_c5_g1;TRINITY_DN1271_c0_g1;TRINITY_DN1228_c1_g2;TRINITY_DN1228_c1_g1;TRINITY_DN1405_c0_g1;TRINITY_DN1563_c2_g1;TRINITY_DN1647_c0_g1;TRINITY_DN1697_c0_g2;TRINITY_DN1808_c4_g1;TRINITY…
ribosome biogenesis	biological_process	GO:0042254	93	TRINITY_DN193_c0_g1;TRINITY_DN485_c3_g1;TRINITY_DN448_c0_g1;TRINITY_DN603_c0_g3;TRINITY_DN786_c3_g1;TRINITY_DN869_c0_g1;TRINITY_DN944_c1_g1;TRINITY_DN940_c0_g1;TRINITY_DN1081_c1_g1;TRINITY_DN1156_c2_g1;TRINITY_DN1283_c0_g1;TRINITY_DN1335_c0_g1;TRINITY_DN1946_c0_g1;TRINITY_DN2072_c0_g1;TRINITY_DN2113_c0_g2;TRINITY_DN3277_c2_g1;TRINITY_DN3302_c0_g2;TRINITY_DN3302_c0_g1;TRINITY_DN3687_c1_g1;TRINITY_…
sensory perception of smell	biological_process	GO:0007608	93	TRINITY_DN240_c0_g1;TRINITY_DN616_c0_g1;TRINITY_DN1155_c1_g2;TRINITY_DN1880_c1_g1;TRINITY_DN2016_c3_g1;TRINITY_DN2714_c1_g1;TRINITY_DN3577_c0_g1;TRINITY_DN3863_c0_g1;TRINITY_DN3906_c1_g1;TRINITY_DN4170_c0_g1;TRINITY_DN5351_c0_g1;TRINITY_DN5351_c0_g3;TRINITY_DN6025_c0_g1;TRINITY_DN7131_c0_g1;TRINITY_DN7709_c0_g1;TRINITY_DN7851_c0_g1;TRINITY_DN9022_c0_g2;TRINITY_DN9088_c0_g1;TRINITY_DN10767_c0_g1;T…
viral nucleocapsid	cellular_component	GO:0019013	92	TRINITY_DN150_c0_g1;TRINITY_DN479_c1_g1;TRINITY_DN479_c6_g1;TRINITY_DN889_c1_g2;TRINITY_DN1104_c1_g4;TRINITY_DN1489_c3_g3;TRINITY_DN1924_c0_g1;TRINITY_DN2081_c0_g1;TRINITY_DN2134_c0_g1;TRINITY_DN2564_c1_g1;TRINITY_DN2568_c0_g1;TRINITY_DN2873_c1_g1;TRINITY_DN3332_c1_g1;TRINITY_DN3403_c0_g1;TRINITY_DN3978_c0_g8;TRINITY_DN4443_c0_g1;TRINITY_DN4654_c2_g2;TRINITY_DN5226_c0_g1;TRINITY_DN5979_c1_g1;TRIN…
toll-like receptor signaling pathway	biological_process	GO:0002224	92	TRINITY_DN35_c0_g1;TRINITY_DN26_c0_g2;TRINITY_DN202_c1_g1;TRINITY_DN333_c0_g1;TRINITY_DN772_c0_g1;TRINITY_DN798_c5_g1;TRINITY_DN843_c3_g2;TRINITY_DN883_c0_g3;TRINITY_DN901_c3_g1;TRINITY_DN1028_c0_g1;TRINITY_DN1077_c0_g1;TRINITY_DN1049_c0_g1;TRINITY_DN1149_c1_g1;TRINITY_DN1120_c0_g1;TRINITY_DN1216_c0_g1;TRINITY_DN1558_c0_g1;TRINITY_DN1724_c0_g1;TRINITY_DN1823_c0_g2;TRINITY_DN1820_c1_g1;TRINITY_DN2…
cerebellum development	biological_process	GO:0021549	92	TRINITY_DN165_c0_g2;TRINITY_DN200_c4_g1;TRINITY_DN265_c4_g1;TRINITY_DN481_c1_g4;TRINITY_DN566_c0_g1;TRINITY_DN678_c3_g1;TRINITY_DN746_c0_g1;TRINITY_DN887_c0_g1;TRINITY_DN828_c0_g1;TRINITY_DN926_c0_g1;TRINITY_DN1308_c0_g2;TRINITY_DN1777_c0_g1;TRINITY_DN2262_c1_g1;TRINITY_DN2428_c0_g1;TRINITY_DN3146_c0_g2;TRINITY_DN3102_c0_g1;TRINITY_DN3154_c1_g1;TRINITY_DN3265_c8_g2;TRINITY_DN3499_c0_g1;TRINITY_DN…
protein serine/threonine phosphatase activity	molecular_function	GO:0004722	92	TRINITY_DN39_c1_g1;TRINITY_DN124_c0_g1;TRINITY_DN191_c2_g1;TRINITY_DN242_c2_g1;TRINITY_DN202_c1_g1;TRINITY_DN387_c2_g1;TRINITY_DN383_c1_g1;TRINITY_DN489_c0_g1;TRINITY_DN560_c1_g2;TRINITY_DN843_c3_g2;TRINITY_DN975_c0_g1;TRINITY_DN989_c1_g2;TRINITY_DN1028_c0_g1;TRINITY_DN1254_c0_g1;TRINITY_DN1311_c0_g1;TRINITY_DN1462_c0_g1;TRINITY_DN1689_c1_g1;TRINITY_DN1735_c5_g1;TRINITY_DN1777_c3_g5;TRINITY_DN176…
transport vesicle	cellular_component	GO:0030133	92	TRINITY_DN86_c3_g2;TRINITY_DN86_c1_g1;TRINITY_DN98_c0_g1;TRINITY_DN114_c0_g1;TRINITY_DN412_c0_g1;TRINITY_DN695_c3_g1;TRINITY_DN690_c0_g1;TRINITY_DN690_c0_g2;TRINITY_DN756_c0_g2;TRINITY_DN854_c0_g2;TRINITY_DN903_c0_g1;TRINITY_DN1086_c0_g1;TRINITY_DN1086_c0_g2;TRINITY_DN1002_c1_g1;TRINITY_DN1217_c0_g1;TRINITY_DN1319_c0_g1;TRINITY_DN1318_c0_g4;TRINITY_DN1318_c0_g1;TRINITY_DN1318_c0_g2;TRINITY_DN1318…
mitochondrial nucleoid	cellular_component	GO:0042645	92	TRINITY_DN472_c0_g2;TRINITY_DN572_c6_g1;TRINITY_DN683_c0_g1;TRINITY_DN783_c0_g1;TRINITY_DN898_c1_g1;TRINITY_DN898_c0_g1;TRINITY_DN980_c0_g1;TRINITY_DN985_c2_g1;TRINITY_DN989_c1_g1;TRINITY_DN1082_c2_g2;TRINITY_DN1153_c2_g1;TRINITY_DN1288_c11_g1;TRINITY_DN1255_c0_g1;TRINITY_DN1282_c11_g1;TRINITY_DN1240_c0_g1;TRINITY_DN1535_c0_g1;TRINITY_DN1624_c0_g1;TRINITY_DN1834_c1_g1;TRINITY_DN1859_c0_g1;TRINITY…
peptidyl-prolyl cis-trans isomerase activity	molecular_function	GO:0003755	92	TRINITY_DN76_c0_g1;TRINITY_DN180_c1_g1;TRINITY_DN169_c0_g1;TRINITY_DN220_c0_g1;TRINITY_DN332_c2_g1;TRINITY_DN315_c0_g1;TRINITY_DN644_c1_g1;TRINITY_DN1212_c2_g1;TRINITY_DN1497_c0_g1;TRINITY_DN1517_c1_g2;TRINITY_DN1698_c0_g1;TRINITY_DN1812_c3_g1;TRINITY_DN2084_c0_g1;TRINITY_DN2140_c1_g1;TRINITY_DN2140_c0_g1;TRINITY_DN2327_c1_g1;TRINITY_DN2488_c3_g1;TRINITY_DN2488_c3_g2;TRINITY_DN2634_c0_g2;TRINITY_…
adult locomotory behavior	biological_process	GO:0008344	92	TRINITY_DN122_c1_g1;TRINITY_DN176_c2_g2;TRINITY_DN176_c2_g1;TRINITY_DN271_c0_g1;TRINITY_DN271_c0_g3;TRINITY_DN481_c1_g4;TRINITY_DN447_c0_g1;TRINITY_DN725_c1_g1;TRINITY_DN877_c9_g1;TRINITY_DN885_c0_g2;TRINITY_DN983_c0_g3;TRINITY_DN1116_c4_g1;TRINITY_DN1151_c3_g2;TRINITY_DN1332_c0_g1;TRINITY_DN1575_c1_g1;TRINITY_DN1517_c3_g1;TRINITY_DN1928_c0_g1;TRINITY_DN2089_c1_g3;TRINITY_DN2123_c1_g3;TRINITY_DN2…
ribosome binding	molecular_function	GO:0043022	92	TRINITY_DN596_c16_g1;TRINITY_DN784_c0_g1;TRINITY_DN784_c0_g2;TRINITY_DN1177_c0_g2;TRINITY_DN1328_c6_g1;TRINITY_DN1611_c0_g2;TRINITY_DN1772_c0_g1;TRINITY_DN1721_c0_g1;TRINITY_DN1941_c3_g1;TRINITY_DN1901_c1_g1;TRINITY_DN2175_c1_g1;TRINITY_DN2607_c0_g2;TRINITY_DN2671_c0_g1;TRINITY_DN2732_c0_g1;TRINITY_DN2861_c1_g1;TRINITY_DN3176_c0_g1;TRINITY_DN3172_c0_g1;TRINITY_DN3172_c0_g2;TRINITY_DN3492_c4_g1;TR…
cell wall organization	biological_process	GO:0071555	92	TRINITY_DN7646_c1_g2;TRINITY_DN12175_c3_g2;TRINITY_DN15645_c1_g3;TRINITY_DN15645_c1_g4;TRINITY_DN15645_c1_g8;TRINITY_DN16390_c0_g5;TRINITY_DN17256_c0_g6;TRINITY_DN17256_c0_g3;TRINITY_DN17256_c0_g16;TRINITY_DN17216_c0_g1;TRINITY_DN18468_c0_g12;TRINITY_DN19699_c0_g4;TRINITY_DN19699_c0_g5;TRINITY_DN19699_c0_g3;TRINITY_DN19774_c0_g2;TRINITY_DN21565_c0_g6;TRINITY_DN21565_c0_g11;TRINITY_DN21602_c0_g10;…
toxin transport	biological_process	GO:1901998	92	TRINITY_DN122_c1_g1;TRINITY_DN258_c0_g1;TRINITY_DN447_c0_g1;TRINITY_DN428_c3_g1;TRINITY_DN735_c0_g1;TRINITY_DN725_c1_g1;TRINITY_DN775_c0_g3;TRINITY_DN801_c0_g1;TRINITY_DN1012_c0_g1;TRINITY_DN1162_c0_g1;TRINITY_DN1288_c1_g1;TRINITY_DN1328_c0_g2;TRINITY_DN1771_c0_g1;TRINITY_DN1948_c1_g1;TRINITY_DN2103_c2_g1;TRINITY_DN2295_c1_g1;TRINITY_DN2350_c0_g1;TRINITY_DN2445_c1_g1;TRINITY_DN2403_c0_g1;TRINITY_…
response to stimulus	biological_process	GO:0050896	92	TRINITY_DN169_c1_g1;TRINITY_DN232_c0_g1;TRINITY_DN392_c1_g1;TRINITY_DN742_c2_g1;TRINITY_DN872_c0_g1;TRINITY_DN1084_c1_g1;TRINITY_DN1231_c0_g2;TRINITY_DN1440_c0_g1;TRINITY_DN1872_c1_g2;TRINITY_DN2003_c0_g1;TRINITY_DN2029_c2_g1;TRINITY_DN2137_c1_g2;TRINITY_DN2456_c0_g1;TRINITY_DN2456_c0_g2;TRINITY_DN2429_c0_g1;TRINITY_DN2626_c0_g1;TRINITY_DN2762_c1_g1;TRINITY_DN2736_c2_g1;TRINITY_DN3656_c1_g1;TRINI…
extracellular vesicle	cellular_component	GO:1903561	91	TRINITY_DN132_c0_g2;TRINITY_DN271_c0_g1;TRINITY_DN271_c0_g3;TRINITY_DN336_c0_g1;TRINITY_DN389_c0_g1;TRINITY_DN1030_c0_g1;TRINITY_DN1119_c0_g1;TRINITY_DN1271_c0_g1;TRINITY_DN1327_c0_g1;TRINITY_DN1529_c0_g1;TRINITY_DN1549_c0_g1;TRINITY_DN1736_c1_g1;TRINITY_DN1706_c0_g1;TRINITY_DN1706_c0_g2;TRINITY_DN1733_c0_g1;TRINITY_DN1925_c1_g1;TRINITY_DN2117_c0_g2;TRINITY_DN2148_c5_g1;TRINITY_DN2359_c0_g1;TRINI…
positive regulation of JNK cascade	biological_process	GO:0046330	91	TRINITY_DN217_c0_g3;TRINITY_DN203_c0_g3;TRINITY_DN645_c0_g1;TRINITY_DN645_c0_g2;TRINITY_DN612_c0_g1;TRINITY_DN611_c4_g1;TRINITY_DN1077_c0_g1;TRINITY_DN1108_c0_g1;TRINITY_DN1208_c0_g1;TRINITY_DN1523_c0_g1;TRINITY_DN1539_c1_g2;TRINITY_DN1675_c0_g1;TRINITY_DN1716_c0_g1;TRINITY_DN1855_c0_g2;TRINITY_DN1858_c0_g1;TRINITY_DN1858_c6_g1;TRINITY_DN1905_c2_g1;TRINITY_DN2052_c0_g1;TRINITY_DN2089_c1_g3;TRINIT…
response to stress	biological_process	GO:0006950	91	TRINITY_DN35_c0_g1;TRINITY_DN162_c0_g1;TRINITY_DN314_c0_g1;TRINITY_DN425_c0_g1;TRINITY_DN631_c0_g1;TRINITY_DN1149_c1_g1;TRINITY_DN1272_c7_g1;TRINITY_DN1558_c0_g1;TRINITY_DN1550_c0_g1;TRINITY_DN1716_c0_g1;TRINITY_DN2052_c0_g1;TRINITY_DN2303_c0_g1;TRINITY_DN2341_c1_g1;TRINITY_DN2621_c4_g1;TRINITY_DN2697_c0_g1;TRINITY_DN2965_c0_g1;TRINITY_DN2902_c1_g1;TRINITY_DN2902_c0_g1;TRINITY_DN3173_c0_g4;TRINIT…
epidermis development	biological_process	GO:0008544	91	TRINITY_DN39_c1_g2;TRINITY_DN8_c1_g1;TRINITY_DN164_c1_g1;TRINITY_DN389_c0_g1;TRINITY_DN546_c0_g1;TRINITY_DN768_c0_g2;TRINITY_DN993_c2_g1;TRINITY_DN1221_c6_g1;TRINITY_DN1340_c0_g1;TRINITY_DN1340_c0_g2;TRINITY_DN1340_c0_g3;TRINITY_DN2252_c0_g1;TRINITY_DN2563_c4_g1;TRINITY_DN2595_c0_g1;TRINITY_DN2832_c1_g1;TRINITY_DN2926_c0_g1;TRINITY_DN3020_c1_g1;TRINITY_DN3289_c0_g1;TRINITY_DN4157_c0_g1;TRINITY_DN…
lung alveolus development	biological_process	GO:0048286	91	TRINITY_DN70_c2_g1;TRINITY_DN78_c6_g1;TRINITY_DN143_c0_g1;TRINITY_DN240_c0_g1;TRINITY_DN217_c0_g3;TRINITY_DN319_c1_g2;TRINITY_DN398_c0_g1;TRINITY_DN398_c0_g2;TRINITY_DN512_c0_g2;TRINITY_DN552_c1_g2;TRINITY_DN760_c4_g1;TRINITY_DN983_c0_g1;TRINITY_DN1146_c0_g2;TRINITY_DN1323_c0_g2;TRINITY_DN1456_c0_g1;TRINITY_DN1625_c7_g1;TRINITY_DN1687_c0_g1;TRINITY_DN1860_c0_g1;TRINITY_DN1871_c0_g1;TRINITY_DN1918…
proteolysis involved in cellular protein catabolic process	biological_process	GO:0051603	91	TRINITY_DN291_c0_g1;TRINITY_DN357_c0_g1;TRINITY_DN410_c0_g1;TRINITY_DN691_c0_g1;TRINITY_DN783_c0_g1;TRINITY_DN714_c1_g1;TRINITY_DN859_c1_g1;TRINITY_DN815_c0_g1;TRINITY_DN989_c1_g1;TRINITY_DN1082_c2_g2;TRINITY_DN1198_c0_g1;TRINITY_DN1119_c0_g1;TRINITY_DN1304_c0_g2;TRINITY_DN1549_c0_g1;TRINITY_DN1656_c1_g1;TRINITY_DN1747_c1_g1;TRINITY_DN1820_c1_g1;TRINITY_DN1963_c2_g1;TRINITY_DN2227_c1_g1;TRINITY_D…
negative regulation of cell death	biological_process	GO:0060548	91	TRINITY_DN29_c5_g1;TRINITY_DN248_c0_g1;TRINITY_DN248_c0_g2;TRINITY_DN291_c0_g1;TRINITY_DN299_c0_g1;TRINITY_DN277_c0_g1;TRINITY_DN512_c0_g2;TRINITY_DN510_c0_g2;TRINITY_DN543_c1_g1;TRINITY_DN609_c0_g1;TRINITY_DN884_c0_g1;TRINITY_DN1597_c1_g1;TRINITY_DN1665_c0_g2;TRINITY_DN1632_c1_g1;TRINITY_DN1771_c0_g1;TRINITY_DN1764_c0_g1;TRINITY_DN1759_c0_g1;TRINITY_DN2033_c0_g1;TRINITY_DN2796_c0_g1;TRINITY_DN28…
structural constituent of virion	molecular_function	GO:0039660	91	TRINITY_DN150_c0_g1;TRINITY_DN479_c1_g1;TRINITY_DN479_c6_g1;TRINITY_DN889_c1_g2;TRINITY_DN918_c0_g1;TRINITY_DN1104_c1_g4;TRINITY_DN1489_c3_g3;TRINITY_DN1924_c0_g1;TRINITY_DN2081_c0_g1;TRINITY_DN2134_c0_g1;TRINITY_DN2564_c1_g1;TRINITY_DN2568_c0_g1;TRINITY_DN2873_c1_g1;TRINITY_DN3332_c1_g1;TRINITY_DN3403_c0_g1;TRINITY_DN3978_c0_g8;TRINITY_DN4443_c0_g1;TRINITY_DN4654_c2_g2;TRINITY_DN5226_c0_g1;TRINI…
blood vessel development	biological_process	GO:0001568	91	TRINITY_DN45_c1_g1;TRINITY_DN259_c0_g6;TRINITY_DN264_c0_g1;TRINITY_DN371_c0_g1;TRINITY_DN362_c0_g1;TRINITY_DN458_c0_g1;TRINITY_DN494_c2_g2;TRINITY_DN512_c0_g1;TRINITY_DN578_c0_g1;TRINITY_DN686_c0_g1;TRINITY_DN619_c1_g1;TRINITY_DN764_c1_g1;TRINITY_DN895_c0_g1;TRINITY_DN802_c0_g1;TRINITY_DN874_c3_g1;TRINITY_DN1146_c0_g2;TRINITY_DN1367_c0_g1;TRINITY_DN1367_c0_g3;TRINITY_DN1420_c0_g2;TRINITY_DN1539_c…
cellular response to starvation	biological_process	GO:0009267	91	TRINITY_DN29_c5_g1;TRINITY_DN223_c0_g2;TRINITY_DN235_c1_g1;TRINITY_DN312_c2_g1;TRINITY_DN354_c6_g1;TRINITY_DN362_c0_g1;TRINITY_DN443_c0_g2;TRINITY_DN751_c1_g2;TRINITY_DN895_c0_g1;TRINITY_DN1093_c0_g1;TRINITY_DN1093_c0_g2;TRINITY_DN1187_c0_g1;TRINITY_DN1635_c0_g1;TRINITY_DN1647_c4_g1;TRINITY_DN2227_c1_g1;TRINITY_DN2341_c0_g1;TRINITY_DN2394_c0_g1;TRINITY_DN2584_c0_g1;TRINITY_DN2634_c0_g3;TRINITY_DN…
negative regulation of extrinsic apoptotic signaling pathway	biological_process	GO:2001237	91	TRINITY_DN74_c0_g1;TRINITY_DN10_c3_g1;TRINITY_DN264_c1_g1;TRINITY_DN412_c0_g1;TRINITY_DN895_c0_g1;TRINITY_DN849_c0_g2;TRINITY_DN849_c0_g3;TRINITY_DN904_c5_g1;TRINITY_DN1044_c0_g1;TRINITY_DN1328_c0_g1;TRINITY_DN1526_c1_g1;TRINITY_DN1506_c4_g1;TRINITY_DN1608_c0_g2;TRINITY_DN1687_c0_g1;TRINITY_DN1853_c0_g1;TRINITY_DN2048_c1_g1;TRINITY_DN2010_c0_g1;TRINITY_DN2111_c0_g1;TRINITY_DN2240_c0_g1;TRINITY_DN…
2 iron, 2 sulfur cluster binding	molecular_function	GO:0051537	91	TRINITY_DN3_c9_g2;TRINITY_DN490_c0_g1;TRINITY_DN668_c1_g1;TRINITY_DN847_c2_g1;TRINITY_DN819_c1_g2;TRINITY_DN819_c1_g1;TRINITY_DN988_c0_g1;TRINITY_DN961_c2_g1;TRINITY_DN1077_c2_g1;TRINITY_DN1450_c2_g1;TRINITY_DN1672_c0_g1;TRINITY_DN1914_c0_g2;TRINITY_DN2367_c0_g1;TRINITY_DN2985_c0_g1;TRINITY_DN3539_c4_g1;TRINITY_DN3539_c1_g1;TRINITY_DN3628_c0_g1;TRINITY_DN3747_c0_g1;TRINITY_DN4768_c8_g1;TRINITY_DN…
response to cold	biological_process	GO:0009409	91	TRINITY_DN134_c0_g1;TRINITY_DN378_c0_g1;TRINITY_DN770_c0_g1;TRINITY_DN1264_c2_g1;TRINITY_DN1341_c0_g1;TRINITY_DN1473_c0_g1;TRINITY_DN1687_c0_g1;TRINITY_DN2065_c1_g1;TRINITY_DN2185_c1_g1;TRINITY_DN2191_c2_g1;TRINITY_DN2261_c0_g1;TRINITY_DN2824_c2_g1;TRINITY_DN2870_c0_g1;TRINITY_DN3054_c4_g1;TRINITY_DN3576_c2_g1;TRINITY_DN3564_c1_g3;TRINITY_DN3651_c0_g1;TRINITY_DN3851_c3_g1;TRINITY_DN3845_c0_g2;TRI…
transcription factor activity, RNA polymerase II distal enhancer sequence-specific binding	molecular_function	GO:0003705	91	TRINITY_DN21_c1_g1;TRINITY_DN165_c1_g4;TRINITY_DN265_c0_g1;TRINITY_DN220_c2_g1;TRINITY_DN347_c1_g1;TRINITY_DN381_c1_g2;TRINITY_DN319_c0_g1;TRINITY_DN372_c0_g1;TRINITY_DN372_c3_g1;TRINITY_DN478_c1_g1;TRINITY_DN508_c0_g3;TRINITY_DN1288_c0_g1;TRINITY_DN1222_c1_g1;TRINITY_DN1473_c1_g2;TRINITY_DN1409_c0_g2;TRINITY_DN2096_c0_g2;TRINITY_DN2167_c0_g2;TRINITY_DN2187_c0_g1;TRINITY_DN2297_c0_g1;TRINITY_DN22…
Rac GTPase binding	molecular_function	GO:0048365	90	TRINITY_DN21_c0_g1;TRINITY_DN132_c0_g1;TRINITY_DN181_c0_g1;TRINITY_DN373_c0_g1;TRINITY_DN519_c0_g1;TRINITY_DN562_c1_g2;TRINITY_DN509_c3_g2;TRINITY_DN626_c0_g1;TRINITY_DN961_c1_g1;TRINITY_DN1118_c1_g1;TRINITY_DN1238_c0_g1;TRINITY_DN1490_c1_g1;TRINITY_DN1402_c0_g1;TRINITY_DN1977_c0_g1;TRINITY_DN2018_c17_g1;TRINITY_DN2286_c8_g1;TRINITY_DN2579_c0_g1;TRINITY_DN2729_c1_g1;TRINITY_DN2898_c1_g1;TRINITY_D…
lactation	biological_process	GO:0007595	90	TRINITY_DN178_c1_g1;TRINITY_DN583_c0_g1;TRINITY_DN746_c0_g1;TRINITY_DN961_c2_g1;TRINITY_DN1092_c0_g4;TRINITY_DN1092_c0_g1;TRINITY_DN1225_c0_g1;TRINITY_DN1585_c0_g1;TRINITY_DN1687_c0_g1;TRINITY_DN1735_c2_g1;TRINITY_DN2049_c0_g1;TRINITY_DN2265_c3_g1;TRINITY_DN2279_c0_g1;TRINITY_DN2837_c0_g1;TRINITY_DN2944_c4_g1;TRINITY_DN3066_c0_g1;TRINITY_DN3102_c0_g1;TRINITY_DN3265_c8_g2;TRINITY_DN3780_c0_g1;TRIN…
phosphorelay sensor kinase activity	molecular_function	GO:0000155	90	TRINITY_DN101_c0_g1;TRINITY_DN3728_c0_g1;TRINITY_DN10350_c0_g1;TRINITY_DN10350_c0_g10;TRINITY_DN12927_c0_g3;TRINITY_DN13694_c0_g5;TRINITY_DN13694_c0_g3;TRINITY_DN14574_c0_g5;TRINITY_DN14574_c0_g1;TRINITY_DN16242_c0_g2;TRINITY_DN16242_c0_g8;TRINITY_DN16390_c0_g6;TRINITY_DN16666_c0_g1;TRINITY_DN17203_c0_g1;TRINITY_DN17203_c0_g2;TRINITY_DN17203_c0_g3;TRINITY_DN19375_c1_g3;TRINITY_DN19375_c1_g2;TRINI…
positive regulation of neuron apoptotic process	biological_process	GO:0043525	90	TRINITY_DN5_c0_g2;TRINITY_DN86_c3_g2;TRINITY_DN40_c0_g1;TRINITY_DN329_c0_g1;TRINITY_DN512_c0_g3;TRINITY_DN770_c0_g1;TRINITY_DN769_c0_g1;TRINITY_DN756_c0_g2;TRINITY_DN827_c0_g1;TRINITY_DN957_c0_g1;TRINITY_DN1022_c0_g1;TRINITY_DN1149_c1_g1;TRINITY_DN1155_c1_g1;TRINITY_DN1208_c0_g1;TRINITY_DN1490_c1_g1;TRINITY_DN1437_c0_g1;TRINITY_DN1647_c2_g1;TRINITY_DN1977_c0_g1;TRINITY_DN2584_c0_g3;TRINITY_DN2817…
regulation of catalytic activity	biological_process	GO:0050790	90	TRINITY_DN291_c0_g1;TRINITY_DN387_c2_g1;TRINITY_DN405_c1_g1;TRINITY_DN537_c0_g1;TRINITY_DN728_c2_g1;TRINITY_DN824_c11_g1;TRINITY_DN1201_c0_g1;TRINITY_DN1315_c1_g1;TRINITY_DN1324_c0_g1;TRINITY_DN1325_c0_g1;TRINITY_DN1354_c0_g1;TRINITY_DN1403_c0_g1;TRINITY_DN1434_c0_g3;TRINITY_DN1600_c0_g1;TRINITY_DN1759_c0_g1;TRINITY_DN2065_c1_g1;TRINITY_DN2168_c2_g1;TRINITY_DN2191_c6_g1;TRINITY_DN2824_c2_g1;TRINI…
cell periphery	cellular_component	GO:0071944	90	TRINITY_DN65_c0_g1;TRINITY_DN65_c0_g2;TRINITY_DN65_c0_g3;TRINITY_DN276_c0_g2;TRINITY_DN317_c0_g1;TRINITY_DN367_c0_g1;TRINITY_DN315_c0_g2;TRINITY_DN496_c1_g1;TRINITY_DN560_c2_g1;TRINITY_DN678_c0_g1;TRINITY_DN768_c0_g2;TRINITY_DN865_c0_g2;TRINITY_DN834_c1_g1;TRINITY_DN1088_c0_g1;TRINITY_DN1070_c2_g3;TRINITY_DN1797_c0_g1;TRINITY_DN1764_c0_g1;TRINITY_DN1764_c0_g2;TRINITY_DN1719_c1_g3;TRINITY_DN1719_c…
positive regulation of synapse assembly	biological_process	GO:0051965	90	TRINITY_DN152_c0_g2;TRINITY_DN152_c0_g3;TRINITY_DN165_c3_g1;TRINITY_DN481_c1_g4;TRINITY_DN1092_c0_g3;TRINITY_DN1072_c0_g1;TRINITY_DN1157_c0_g1;TRINITY_DN1328_c7_g1;TRINITY_DN1516_c0_g1;TRINITY_DN1648_c0_g1;TRINITY_DN1611_c1_g2;TRINITY_DN1611_c1_g1;TRINITY_DN1891_c0_g1;TRINITY_DN1814_c1_g2;TRINITY_DN1814_c1_g1;TRINITY_DN2650_c1_g1;TRINITY_DN3195_c0_g2;TRINITY_DN3357_c1_g2;TRINITY_DN3345_c3_g1;TRIN…
phosphoprotein phosphatase activity	molecular_function	GO:0004721	90	TRINITY_DN1_c0_g1;TRINITY_DN96_c0_g1;TRINITY_DN120_c2_g1;TRINITY_DN203_c0_g2;TRINITY_DN387_c2_g1;TRINITY_DN346_c1_g1;TRINITY_DN489_c0_g1;TRINITY_DN560_c1_g2;TRINITY_DN734_c1_g1;TRINITY_DN1197_c0_g1;TRINITY_DN1254_c2_g1;TRINITY_DN1311_c0_g1;TRINITY_DN1462_c0_g1;TRINITY_DN1712_c0_g1;TRINITY_DN1777_c3_g5;TRINITY_DN1764_c0_g1;TRINITY_DN1764_c0_g2;TRINITY_DN1732_c0_g1;TRINITY_DN1979_c1_g1;TRINITY_DN20…
cell-cell adherens junction	cellular_component	GO:0005913	90	TRINITY_DN109_c1_g1;TRINITY_DN352_c0_g2;TRINITY_DN336_c0_g1;TRINITY_DN428_c1_g1;TRINITY_DN572_c1_g1;TRINITY_DN760_c0_g1;TRINITY_DN978_c0_g1;TRINITY_DN978_c0_g2;TRINITY_DN1348_c1_g1;TRINITY_DN1670_c2_g1;TRINITY_DN1775_c0_g2;TRINITY_DN1808_c4_g1;TRINITY_DN1822_c0_g2;TRINITY_DN1947_c0_g1;TRINITY_DN1932_c0_g2;TRINITY_DN1932_c0_g3;TRINITY_DN1901_c2_g2;TRINITY_DN1957_c0_g1;TRINITY_DN2137_c0_g1;TRINITY_…
response to UV	biological_process	GO:0009411	90	TRINITY_DN21_c1_g1;TRINITY_DN186_c1_g1;TRINITY_DN346_c1_g1;TRINITY_DN402_c1_g1;TRINITY_DN543_c0_g2;TRINITY_DN663_c1_g1;TRINITY_DN661_c1_g1;TRINITY_DN731_c0_g1;TRINITY_DN832_c1_g1;TRINITY_DN845_c0_g1;TRINITY_DN864_c2_g1;TRINITY_DN1149_c1_g1;TRINITY_DN1155_c1_g1;TRINITY_DN1264_c0_g3;TRINITY_DN1218_c0_g1;TRINITY_DN1432_c0_g1;TRINITY_DN1657_c0_g1;TRINITY_DN1851_c0_g1;TRINITY_DN1857_c1_g1;TRINITY_DN19…
Cajal body	cellular_component	GO:0015030	89	TRINITY_DN150_c1_g1;TRINITY_DN319_c2_g1;TRINITY_DN465_c1_g1;TRINITY_DN474_c1_g2;TRINITY_DN400_c0_g5;TRINITY_DN400_c0_g1;TRINITY_DN702_c0_g1;TRINITY_DN889_c0_g1;TRINITY_DN882_c0_g1;TRINITY_DN1133_c0_g1;TRINITY_DN1239_c1_g1;TRINITY_DN1306_c2_g1;TRINITY_DN1512_c1_g2;TRINITY_DN1619_c0_g1;TRINITY_DN1809_c5_g1;TRINITY_DN2088_c0_g1;TRINITY_DN2185_c2_g1;TRINITY_DN2241_c0_g1;TRINITY_DN2400_c1_g1;TRINITY_D…
visual learning	biological_process	GO:0008542	89	TRINITY_DN13_c2_g2;TRINITY_DN13_c2_g1;TRINITY_DN175_c0_g1;TRINITY_DN172_c0_g1;TRINITY_DN271_c0_g1;TRINITY_DN271_c0_g3;TRINITY_DN283_c0_g1;TRINITY_DN387_c4_g1;TRINITY_DN302_c0_g1;TRINITY_DN354_c0_g2;TRINITY_DN481_c1_g4;TRINITY_DN545_c0_g1;TRINITY_DN769_c0_g1;TRINITY_DN901_c0_g2;TRINITY_DN967_c0_g1;TRINITY_DN1428_c2_g1;TRINITY_DN1608_c0_g2;TRINITY_DN1685_c0_g1;TRINITY_DN1817_c0_g1;TRINITY_DN2183_c2…
autophagosome assembly	biological_process	GO:0000045	89	TRINITY_DN29_c5_g1;TRINITY_DN238_c1_g1;TRINITY_DN200_c1_g1;TRINITY_DN270_c0_g1;TRINITY_DN270_c0_g2;TRINITY_DN494_c2_g2;TRINITY_DN439_c3_g1;TRINITY_DN589_c0_g1;TRINITY_DN540_c0_g3;TRINITY_DN699_c0_g1;TRINITY_DN632_c1_g1;TRINITY_DN615_c0_g1;TRINITY_DN723_c1_g3;TRINITY_DN723_c1_g2;TRINITY_DN876_c0_g1;TRINITY_DN923_c2_g1;TRINITY_DN1025_c0_g1;TRINITY_DN1065_c0_g1;TRINITY_DN1065_c0_g2;TRINITY_DN1140_c5…
ATP-dependent chromatin remodeling	biological_process	GO:0043044	89	TRINITY_DN206_c0_g1;TRINITY_DN307_c2_g1;TRINITY_DN338_c1_g1;TRINITY_DN426_c1_g1;TRINITY_DN420_c0_g2;TRINITY_DN404_c0_g1;TRINITY_DN529_c7_g1;TRINITY_DN545_c0_g1;TRINITY_DN885_c1_g1;TRINITY_DN901_c16_g1;TRINITY_DN906_c1_g2;TRINITY_DN906_c1_g1;TRINITY_DN1328_c0_g2;TRINITY_DN1357_c0_g1;TRINITY_DN1499_c0_g1;TRINITY_DN1499_c0_g2;TRINITY_DN1554_c7_g1;TRINITY_DN1770_c2_g1;TRINITY_DN2488_c0_g2;TRINITY_DN2…
protein binding, bridging	molecular_function	GO:0030674	89	TRINITY_DN39_c1_g2;TRINITY_DN104_c0_g1;TRINITY_DN307_c0_g1;TRINITY_DN322_c0_g1;TRINITY_DN320_c0_g1;TRINITY_DN562_c1_g2;TRINITY_DN578_c0_g1;TRINITY_DN653_c1_g2;TRINITY_DN701_c0_g1;TRINITY_DN824_c11_g1;TRINITY_DN908_c0_g1;TRINITY_DN1012_c0_g1;TRINITY_DN1238_c1_g1;TRINITY_DN1474_c0_g1;TRINITY_DN1474_c0_g2;TRINITY_DN1657_c1_g1;TRINITY_DN1670_c0_g1;TRINITY_DN1781_c0_g1;TRINITY_DN1791_c0_g1;TRINITY_DN1…
rough endoplasmic reticulum	cellular_component	GO:0005791	89	TRINITY_DN78_c6_g1;TRINITY_DN296_c3_g1;TRINITY_DN259_c4_g2;TRINITY_DN322_c2_g1;TRINITY_DN494_c2_g2;TRINITY_DN486_c0_g1;TRINITY_DN629_c0_g1;TRINITY_DN1263_c6_g1;TRINITY_DN1513_c0_g1;TRINITY_DN1531_c1_g1;TRINITY_DN1762_c0_g1;TRINITY_DN1766_c0_g5;TRINITY_DN1766_c0_g1;TRINITY_DN2147_c0_g1;TRINITY_DN2191_c2_g1;TRINITY_DN2517_c0_g1;TRINITY_DN3077_c0_g1;TRINITY_DN3165_c3_g1;TRINITY_DN3291_c2_g1;TRINITY_…
peroxisomal membrane	cellular_component	GO:0005778	89	TRINITY_DN163_c1_g1;TRINITY_DN301_c1_g1;TRINITY_DN675_c0_g1;TRINITY_DN761_c0_g1;TRINITY_DN736_c0_g1;TRINITY_DN1004_c0_g1;TRINITY_DN1046_c0_g1;TRINITY_DN1216_c0_g2;TRINITY_DN1282_c0_g1;TRINITY_DN1282_c0_g2;TRINITY_DN1375_c1_g1;TRINITY_DN1378_c0_g1;TRINITY_DN1946_c0_g1;TRINITY_DN1946_c2_g1;TRINITY_DN1928_c5_g1;TRINITY_DN2018_c1_g1;TRINITY_DN2317_c0_g1;TRINITY_DN2326_c0_g1;TRINITY_DN2776_c0_g1;TRINI…
response to hormone	biological_process	GO:0009725	88	TRINITY_DN29_c3_g1;TRINITY_DN28_c0_g3;TRINITY_DN572_c1_g1;TRINITY_DN901_c1_g1;TRINITY_DN944_c0_g1;TRINITY_DN908_c0_g1;TRINITY_DN989_c1_g1;TRINITY_DN1050_c0_g2;TRINITY_DN1541_c0_g2;TRINITY_DN1691_c3_g1;TRINITY_DN1691_c3_g2;TRINITY_DN1900_c1_g1;TRINITY_DN2096_c0_g2;TRINITY_DN2289_c0_g1;TRINITY_DN2279_c0_g1;TRINITY_DN2341_c1_g1;TRINITY_DN2491_c0_g1;TRINITY_DN2459_c1_g1;TRINITY_DN2862_c0_g1;TRINITY_D…
calcium-dependent protein binding	molecular_function	GO:0048306	88	TRINITY_DN50_c1_g1;TRINITY_DN159_c1_g1;TRINITY_DN157_c0_g1;TRINITY_DN182_c0_g1;TRINITY_DN367_c0_g1;TRINITY_DN516_c0_g1;TRINITY_DN708_c0_g1;TRINITY_DN776_c1_g1;TRINITY_DN825_c0_g2;TRINITY_DN854_c0_g2;TRINITY_DN908_c0_g1;TRINITY_DN1167_c0_g1;TRINITY_DN1239_c3_g2;TRINITY_DN1345_c1_g1;TRINITY_DN1528_c1_g1;TRINITY_DN1538_c2_g1;TRINITY_DN1780_c1_g1;TRINITY_DN1790_c1_g1;TRINITY_DN2005_c0_g1;TRINITY_DN20…
MyD88-dependent toll-like receptor signaling pathway	biological_process	GO:0002755	88	TRINITY_DN35_c0_g1;TRINITY_DN26_c0_g2;TRINITY_DN118_c1_g1;TRINITY_DN202_c1_g1;TRINITY_DN333_c0_g1;TRINITY_DN772_c0_g1;TRINITY_DN798_c5_g1;TRINITY_DN843_c3_g2;TRINITY_DN883_c0_g3;TRINITY_DN1028_c0_g1;TRINITY_DN1077_c0_g1;TRINITY_DN1149_c1_g1;TRINITY_DN1216_c0_g1;TRINITY_DN1558_c0_g1;TRINITY_DN1724_c0_g1;TRINITY_DN1823_c0_g2;TRINITY_DN1905_c2_g1;TRINITY_DN2191_c2_g1;TRINITY_DN2283_c0_g1;TRINITY_DN2…
SMAD protein signal transduction	biological_process	GO:0060395	88	TRINITY_DN98_c1_g5;TRINITY_DN49_c2_g1;TRINITY_DN14_c0_g1;TRINITY_DN156_c1_g2;TRINITY_DN244_c0_g1;TRINITY_DN314_c0_g2;TRINITY_DN319_c0_g1;TRINITY_DN512_c0_g2;TRINITY_DN594_c2_g1;TRINITY_DN739_c0_g1;TRINITY_DN805_c1_g1;TRINITY_DN1030_c0_g1;TRINITY_DN1166_c0_g3;TRINITY_DN1102_c0_g2;TRINITY_DN1486_c0_g2;TRINITY_DN2089_c1_g3;TRINITY_DN2459_c1_g1;TRINITY_DN3027_c0_g1;TRINITY_DN3075_c0_g1;TRINITY_DN3165…
skin development	biological_process	GO:0043588	88	TRINITY_DN39_c1_g2;TRINITY_DN172_c1_g2;TRINITY_DN264_c1_g1;TRINITY_DN518_c2_g1;TRINITY_DN560_c0_g1;TRINITY_DN682_c2_g1;TRINITY_DN895_c0_g1;TRINITY_DN802_c0_g1;TRINITY_DN1420_c0_g2;TRINITY_DN1539_c2_g2;TRINITY_DN1539_c4_g1;TRINITY_DN1539_c2_g1;TRINITY_DN1573_c0_g1;TRINITY_DN1697_c0_g2;TRINITY_DN1910_c0_g2;TRINITY_DN2110_c0_g3;TRINITY_DN2167_c0_g2;TRINITY_DN2103_c0_g1;TRINITY_DN2386_c2_g1;TRINITY_D…
viral envelope	cellular_component	GO:0019031	88	TRINITY_DN150_c0_g1;TRINITY_DN1834_c0_g1;TRINITY_DN1834_c2_g1;TRINITY_DN1924_c0_g1;TRINITY_DN2178_c0_g1;TRINITY_DN2306_c5_g1;TRINITY_DN3059_c0_g1;TRINITY_DN3017_c0_g1;TRINITY_DN3816_c2_g1;TRINITY_DN3990_c0_g1;TRINITY_DN3978_c0_g5;TRINITY_DN4031_c0_g1;TRINITY_DN4036_c0_g1;TRINITY_DN4443_c0_g1;TRINITY_DN4684_c2_g1;TRINITY_DN4975_c0_g1;TRINITY_DN5268_c0_g2;TRINITY_DN5875_c0_g1;TRINITY_DN5930_c0_g1;T…
cellular iron ion homeostasis	biological_process	GO:0006879	88	TRINITY_DN83_c1_g1;TRINITY_DN86_c8_g1;TRINITY_DN1_c3_g1;TRINITY_DN1_c3_g2;TRINITY_DN581_c0_g1;TRINITY_DN784_c0_g1;TRINITY_DN775_c0_g2;TRINITY_DN712_c6_g1;TRINITY_DN822_c0_g1;TRINITY_DN809_c0_g1;TRINITY_DN939_c0_g2;TRINITY_DN1077_c2_g1;TRINITY_DN1345_c1_g4;TRINITY_DN1329_c0_g1;TRINITY_DN1489_c3_g1;TRINITY_DN1486_c0_g2;TRINITY_DN1723_c0_g2;TRINITY_DN2241_c4_g1;TRINITY_DN2409_c0_g1;TRINITY_DN2426_c1…
cell	cellular_component	GO:0005623	88	TRINITY_DN125_c1_g1;TRINITY_DN235_c0_g4;TRINITY_DN336_c0_g1;TRINITY_DN484_c1_g1;TRINITY_DN712_c9_g1;TRINITY_DN822_c0_g1;TRINITY_DN806_c1_g1;TRINITY_DN1289_c0_g1;TRINITY_DN1283_c3_g2;TRINITY_DN1252_c1_g1;TRINITY_DN1425_c0_g1;TRINITY_DN1506_c4_g1;TRINITY_DN1677_c0_g1;TRINITY_DN1870_c1_g1;TRINITY_DN2241_c4_g1;TRINITY_DN2303_c0_g3;TRINITY_DN2307_c0_g1;TRINITY_DN2419_c0_g1;TRINITY_DN2738_c1_g1;TRINITY…
phagocytosis	biological_process	GO:0006909	88	TRINITY_DN83_c1_g1;TRINITY_DN176_c2_g2;TRINITY_DN259_c1_g1;TRINITY_DN258_c0_g1;TRINITY_DN387_c4_g1;TRINITY_DN387_c2_g1;TRINITY_DN372_c1_g1;TRINITY_DN572_c0_g1;TRINITY_DN592_c0_g1;TRINITY_DN908_c0_g1;TRINITY_DN1167_c0_g1;TRINITY_DN1272_c7_g2;TRINITY_DN1434_c0_g1;TRINITY_DN1740_c0_g1;TRINITY_DN1946_c1_g1;TRINITY_DN2089_c2_g1;TRINITY_DN2198_c1_g1;TRINITY_DN2176_c0_g2;TRINITY_DN2278_c1_g3;TRINITY_DN2…
negative regulation of Wnt signaling pathway	biological_process	GO:0030178	88	TRINITY_DN98_c1_g1;TRINITY_DN62_c0_g1;TRINITY_DN33_c3_g2;TRINITY_DN277_c0_g2;TRINITY_DN381_c1_g1;TRINITY_DN477_c0_g3;TRINITY_DN802_c0_g1;TRINITY_DN906_c1_g2;TRINITY_DN906_c1_g1;TRINITY_DN1027_c0_g1;TRINITY_DN1088_c0_g1;TRINITY_DN1149_c2_g1;TRINITY_DN1285_c3_g1;TRINITY_DN1246_c2_g1;TRINITY_DN1267_c1_g2;TRINITY_DN1311_c1_g1;TRINITY_DN1697_c0_g2;TRINITY_DN1743_c1_g3;TRINITY_DN2393_c2_g2;TRINITY_DN27…
collagen trimer	cellular_component	GO:0005581	88	TRINITY_DN78_c6_g1;TRINITY_DN184_c1_g1;TRINITY_DN176_c0_g1;TRINITY_DN172_c1_g2;TRINITY_DN213_c0_g1;TRINITY_DN578_c0_g1;TRINITY_DN821_c0_g1;TRINITY_DN874_c3_g1;TRINITY_DN950_c0_g1;TRINITY_DN1070_c2_g3;TRINITY_DN1062_c0_g1;TRINITY_DN1213_c0_g2;TRINITY_DN1420_c0_g2;TRINITY_DN1539_c2_g2;TRINITY_DN1539_c2_g1;TRINITY_DN1736_c6_g1;TRINITY_DN1792_c1_g1;TRINITY_DN1786_c1_g1;TRINITY_DN1733_c0_g1;TRINITY_DN…
toll-like receptor 4 signaling pathway	biological_process	GO:0034142	88	TRINITY_DN35_c0_g1;TRINITY_DN49_c1_g1;TRINITY_DN26_c0_g2;TRINITY_DN202_c1_g1;TRINITY_DN333_c0_g1;TRINITY_DN772_c0_g1;TRINITY_DN798_c5_g1;TRINITY_DN843_c3_g2;TRINITY_DN883_c0_g3;TRINITY_DN901_c3_g1;TRINITY_DN1028_c0_g1;TRINITY_DN1077_c0_g1;TRINITY_DN1049_c0_g1;TRINITY_DN1149_c1_g1;TRINITY_DN1120_c0_g1;TRINITY_DN1216_c0_g1;TRINITY_DN1558_c0_g1;TRINITY_DN1724_c0_g1;TRINITY_DN1823_c0_g2;TRINITY_DN228…
cation transmembrane transport	biological_process	GO:0098655	88	TRINITY_DN77_c0_g1;TRINITY_DN75_c1_g1;TRINITY_DN225_c0_g1;TRINITY_DN372_c7_g1;TRINITY_DN467_c0_g1;TRINITY_DN657_c0_g1;TRINITY_DN809_c0_g1;TRINITY_DN859_c0_g1;TRINITY_DN1308_c0_g1;TRINITY_DN1828_c5_g1;TRINITY_DN1805_c1_g1;TRINITY_DN1934_c0_g1;TRINITY_DN2123_c2_g1;TRINITY_DN2586_c1_g2;TRINITY_DN3601_c1_g1;TRINITY_DN3817_c0_g1;TRINITY_DN4375_c0_g1;TRINITY_DN4396_c0_g2;TRINITY_DN5086_c0_g1;TRINITY_DN…
microtubule-based process	biological_process	GO:0007017	88	TRINITY_DN297_c0_g1;TRINITY_DN750_c0_g1;TRINITY_DN799_c0_g1;TRINITY_DN913_c13_g1;TRINITY_DN1208_c0_g1;TRINITY_DN1857_c0_g1;TRINITY_DN2715_c0_g1;TRINITY_DN2756_c1_g1;TRINITY_DN2762_c0_g1;TRINITY_DN2762_c2_g2;TRINITY_DN2762_c2_g1;TRINITY_DN2886_c1_g1;TRINITY_DN2886_c2_g1;TRINITY_DN2886_c0_g1;TRINITY_DN2886_c0_g2;TRINITY_DN2886_c0_g3;TRINITY_DN3214_c1_g3;TRINITY_DN3214_c1_g2;TRINITY_DN3214_c1_g5;TRI…
positive regulation of cell adhesion	biological_process	GO:0045785	87	TRINITY_DN378_c10_g1;TRINITY_DN694_c0_g1;TRINITY_DN716_c0_g1;TRINITY_DN785_c2_g1;TRINITY_DN712_c1_g1;TRINITY_DN913_c2_g1;TRINITY_DN1165_c0_g1;TRINITY_DN1218_c3_g1;TRINITY_DN1267_c0_g1;TRINITY_DN1561_c0_g1;TRINITY_DN1697_c0_g2;TRINITY_DN1642_c1_g1;TRINITY_DN1687_c0_g1;TRINITY_DN1827_c3_g1;TRINITY_DN1814_c0_g1;TRINITY_DN1936_c1_g1;TRINITY_DN2150_c0_g1;TRINITY_DN2176_c0_g1;TRINITY_DN2176_c0_g2;TRINI…
proteasome complex	cellular_component	GO:0000502	87	TRINITY_DN49_c0_g2;TRINITY_DN206_c0_g1;TRINITY_DN471_c0_g1;TRINITY_DN514_c0_g3;TRINITY_DN560_c2_g1;TRINITY_DN548_c5_g2;TRINITY_DN520_c3_g3;TRINITY_DN682_c1_g2;TRINITY_DN691_c0_g1;TRINITY_DN762_c2_g1;TRINITY_DN859_c1_g1;TRINITY_DN849_c1_g1;TRINITY_DN848_c1_g1;TRINITY_DN1107_c0_g1;TRINITY_DN1304_c0_g2;TRINITY_DN1656_c1_g1;TRINITY_DN1850_c0_g1;TRINITY_DN2173_c0_g1;TRINITY_DN2185_c0_g1;TRINITY_DN2169…
collagen fibril organization	biological_process	GO:0030199	87	TRINITY_DN78_c12_g1;TRINITY_DN11_c0_g1;TRINITY_DN99_c0_g4;TRINITY_DN165_c1_g4;TRINITY_DN172_c1_g2;TRINITY_DN213_c0_g1;TRINITY_DN324_c0_g1;TRINITY_DN578_c0_g1;TRINITY_DN560_c0_g1;TRINITY_DN563_c0_g1;TRINITY_DN634_c0_g1;TRINITY_DN780_c0_g1;TRINITY_DN874_c3_g1;TRINITY_DN935_c5_g1;TRINITY_DN1073_c1_g1;TRINITY_DN1131_c0_g1;TRINITY_DN1420_c0_g2;TRINITY_DN1539_c2_g2;TRINITY_DN1539_c4_g1;TRINITY_DN1539_c…
platelet aggregation	biological_process	GO:0070527	87	TRINITY_DN176_c2_g2;TRINITY_DN121_c0_g1;TRINITY_DN395_c0_g2;TRINITY_DN395_c0_g3;TRINITY_DN336_c0_g1;TRINITY_DN319_c0_g2;TRINITY_DN483_c0_g1;TRINITY_DN682_c2_g1;TRINITY_DN703_c1_g1;TRINITY_DN712_c9_g1;TRINITY_DN1241_c0_g2;TRINITY_DN1382_c0_g1;TRINITY_DN1402_c0_g1;TRINITY_DN1463_c0_g1;TRINITY_DN1463_c0_g2;TRINITY_DN1541_c0_g2;TRINITY_DN1658_c1_g1;TRINITY_DN1671_c0_g1;TRINITY_DN1671_c0_g2;TRINITY_DN…
phagocytosis, engulfment	biological_process	GO:0006911	87	TRINITY_DN372_c2_g1;TRINITY_DN1391_c1_g1;TRINITY_DN1391_c0_g1;TRINITY_DN1313_c1_g1;TRINITY_DN1926_c0_g1;TRINITY_DN1926_c0_g2;TRINITY_DN2089_c0_g1;TRINITY_DN2137_c0_g1;TRINITY_DN2117_c0_g2;TRINITY_DN2221_c1_g2;TRINITY_DN2244_c1_g1;TRINITY_DN2365_c2_g1;TRINITY_DN2365_c0_g1;TRINITY_DN3026_c4_g1;TRINITY_DN3524_c0_g2;TRINITY_DN4131_c0_g1;TRINITY_DN4488_c0_g1;TRINITY_DN4802_c0_g1;TRINITY_DN4978_c0_g1;T…
cell fate commitment	biological_process	GO:0045165	87	TRINITY_DN110_c4_g1;TRINITY_DN217_c11_g1;TRINITY_DN217_c0_g3;TRINITY_DN319_c0_g1;TRINITY_DN319_c0_g2;TRINITY_DN480_c0_g1;TRINITY_DN428_c7_g1;TRINITY_DN510_c0_g1;TRINITY_DN1166_c0_g1;TRINITY_DN1155_c1_g1;TRINITY_DN1625_c7_g1;TRINITY_DN1955_c0_g1;TRINITY_DN2187_c0_g1;TRINITY_DN2293_c4_g1;TRINITY_DN2535_c2_g1;TRINITY_DN2839_c0_g1;TRINITY_DN3792_c0_g1;TRINITY_DN3908_c0_g2;TRINITY_DN4482_c4_g1;TRINITY…
inner ear development	biological_process	GO:0048839	87	TRINITY_DN35_c0_g1;TRINITY_DN86_c3_g2;TRINITY_DN156_c1_g2;TRINITY_DN265_c0_g2;TRINITY_DN439_c1_g2;TRINITY_DN439_c1_g1;TRINITY_DN756_c0_g2;TRINITY_DN1156_c2_g1;TRINITY_DN1197_c0_g1;TRINITY_DN1590_c0_g3;TRINITY_DN1541_c0_g2;TRINITY_DN1541_c0_g3;TRINITY_DN1714_c3_g1;TRINITY_DN1740_c0_g1;TRINITY_DN1828_c4_g2;TRINITY_DN2057_c0_g1;TRINITY_DN2064_c0_g1;TRINITY_DN2103_c0_g1;TRINITY_DN2298_c0_g1;TRINITY_D…
endosome to lysosome transport	biological_process	GO:0008333	87	TRINITY_DN91_c0_g1;TRINITY_DN114_c0_g1;TRINITY_DN264_c3_g1;TRINITY_DN595_c1_g1;TRINITY_DN538_c0_g1;TRINITY_DN577_c0_g1;TRINITY_DN623_c1_g1;TRINITY_DN640_c0_g2;TRINITY_DN704_c0_g1;TRINITY_DN895_c2_g1;TRINITY_DN929_c0_g1;TRINITY_DN1012_c0_g1;TRINITY_DN1085_c1_g1;TRINITY_DN1206_c1_g1;TRINITY_DN1763_c1_g1;TRINITY_DN1891_c0_g1;TRINITY_DN2030_c0_g1;TRINITY_DN2030_c0_g3;TRINITY_DN2121_c1_g1;TRINITY_DN23…
antiporter activity	molecular_function	GO:0015297	86	TRINITY_DN4_c0_g1;TRINITY_DN87_c0_g4;TRINITY_DN87_c0_g1;TRINITY_DN87_c0_g2;TRINITY_DN692_c0_g1;TRINITY_DN911_c0_g1;TRINITY_DN1872_c2_g1;TRINITY_DN1819_c0_g2;TRINITY_DN1819_c0_g1;TRINITY_DN1935_c4_g1;TRINITY_DN2230_c1_g2;TRINITY_DN2244_c1_g1;TRINITY_DN2964_c1_g1;TRINITY_DN3165_c1_g1;TRINITY_DN3362_c0_g1;TRINITY_DN4073_c0_g1;TRINITY_DN4081_c1_g1;TRINITY_DN4311_c0_g1;TRINITY_DN4952_c2_g2;TRINITY_DN6…
stimulatory C-type lectin receptor signaling pathway	biological_process	GO:0002223	86	TRINITY_DN165_c1_g2;TRINITY_DN203_c0_g3;TRINITY_DN548_c5_g2;TRINITY_DN682_c1_g2;TRINITY_DN619_c0_g1;TRINITY_DN1028_c0_g1;TRINITY_DN1077_c0_g1;TRINITY_DN1107_c0_g1;TRINITY_DN1222_c1_g1;TRINITY_DN1223_c0_g1;TRINITY_DN1311_c0_g1;TRINITY_DN1490_c1_g1;TRINITY_DN1426_c0_g1;TRINITY_DN1656_c1_g1;TRINITY_DN1724_c0_g1;TRINITY_DN1719_c0_g1;TRINITY_DN1823_c0_g2;TRINITY_DN2185_c0_g1;TRINITY_DN2183_c2_g1;TRINI…
intercalated disc	cellular_component	GO:0014704	86	TRINITY_DN39_c1_g2;TRINITY_DN157_c0_g1;TRINITY_DN271_c0_g1;TRINITY_DN293_c0_g1;TRINITY_DN420_c1_g1;TRINITY_DN545_c0_g1;TRINITY_DN665_c6_g1;TRINITY_DN671_c4_g1;TRINITY_DN751_c0_g1;TRINITY_DN978_c0_g1;TRINITY_DN978_c0_g2;TRINITY_DN1392_c0_g2;TRINITY_DN1563_c2_g1;TRINITY_DN1670_c2_g1;TRINITY_DN1843_c0_g1;TRINITY_DN1822_c0_g2;TRINITY_DN1932_c0_g2;TRINITY_DN1932_c0_g3;TRINITY_DN2035_c0_g1;TRINITY_DN21…
positive regulation of MAP kinase activity	biological_process	GO:0043406	86	TRINITY_DN86_c3_g1;TRINITY_DN86_c3_g3;TRINITY_DN86_c3_g4;TRINITY_DN49_c1_g1;TRINITY_DN203_c0_g3;TRINITY_DN377_c0_g1;TRINITY_DN310_c0_g1;TRINITY_DN333_c0_g1;TRINITY_DN494_c2_g2;TRINITY_DN703_c1_g1;TRINITY_DN1146_c0_g4;TRINITY_DN1590_c0_g3;TRINITY_DN1541_c0_g3;TRINITY_DN1632_c1_g1;TRINITY_DN1687_c0_g1;TRINITY_DN1719_c0_g1;TRINITY_DN1858_c0_g1;TRINITY_DN1858_c6_g1;TRINITY_DN1821_c0_g1;TRINITY_DN2183…
negative regulation of phosphatase activity	biological_process	GO:0010923	86	TRINITY_DN184_c2_g1;TRINITY_DN690_c0_g1;TRINITY_DN690_c0_g2;TRINITY_DN620_c1_g1;TRINITY_DN838_c0_g1;TRINITY_DN854_c0_g2;TRINITY_DN1026_c0_g1;TRINITY_DN1199_c3_g1;TRINITY_DN1138_c0_g1;TRINITY_DN1280_c0_g1;TRINITY_DN1306_c2_g1;TRINITY_DN1407_c0_g1;TRINITY_DN1470_c0_g1;TRINITY_DN1870_c0_g1;TRINITY_DN1870_c0_g2;TRINITY_DN2023_c1_g2;TRINITY_DN2125_c0_g1;TRINITY_DN2324_c0_g1;TRINITY_DN2313_c0_g1;TRINIT…
positive regulation of protein kinase activity	biological_process	GO:0045860	86	TRINITY_DN181_c0_g1;TRINITY_DN100_c0_g1;TRINITY_DN217_c0_g3;TRINITY_DN427_c0_g1;TRINITY_DN519_c0_g1;TRINITY_DN525_c0_g1;TRINITY_DN563_c0_g1;TRINITY_DN769_c0_g1;TRINITY_DN825_c0_g2;TRINITY_DN1065_c2_g1;TRINITY_DN1259_c0_g1;TRINITY_DN1202_c0_g1;TRINITY_DN1283_c2_g1;TRINITY_DN1264_c5_g2;TRINITY_DN1419_c0_g1;TRINITY_DN1677_c0_g1;TRINITY_DN1855_c0_g2;TRINITY_DN2226_c1_g2;TRINITY_DN2341_c1_g1;TRINITY_D…
dorsal/ventral pattern formation	biological_process	GO:0009953	86	TRINITY_DN8_c1_g1;TRINITY_DN14_c0_g2;TRINITY_DN329_c0_g1;TRINITY_DN389_c0_g1;TRINITY_DN1697_c0_g2;TRINITY_DN1604_c0_g1;TRINITY_DN1828_c4_g2;TRINITY_DN1949_c0_g1;TRINITY_DN2006_c0_g1;TRINITY_DN2006_c0_g2;TRINITY_DN2202_c1_g1;TRINITY_DN2327_c1_g1;TRINITY_DN2767_c2_g1;TRINITY_DN2866_c0_g1;TRINITY_DN2851_c1_g1;TRINITY_DN2961_c2_g1;TRINITY_DN2986_c0_g1;TRINITY_DN2905_c0_g1;TRINITY_DN3252_c0_g1;TRINITY…
leukocyte migration	biological_process	GO:0050900	86	TRINITY_DN203_c0_g3;TRINITY_DN264_c1_g1;TRINITY_DN496_c1_g1;TRINITY_DN459_c0_g1;TRINITY_DN577_c0_g1;TRINITY_DN580_c0_g1;TRINITY_DN1080_c2_g1;TRINITY_DN1197_c0_g1;TRINITY_DN1272_c7_g2;TRINITY_DN1848_c0_g1;TRINITY_DN2183_c2_g1;TRINITY_DN2283_c2_g1;TRINITY_DN2395_c2_g1;TRINITY_DN2690_c0_g1;TRINITY_DN2646_c0_g1;TRINITY_DN2829_c0_g1;TRINITY_DN2964_c1_g1;TRINITY_DN3030_c0_g1;TRINITY_DN3276_c0_g1;TRINIT…
somitogenesis	biological_process	GO:0001756	86	TRINITY_DN62_c0_g1;TRINITY_DN165_c1_g2;TRINITY_DN165_c1_g4;TRINITY_DN217_c0_g3;TRINITY_DN494_c2_g2;TRINITY_DN619_c1_g1;TRINITY_DN1030_c0_g1;TRINITY_DN1102_c0_g2;TRINITY_DN1211_c0_g1;TRINITY_DN1409_c1_g1;TRINITY_DN2167_c0_g2;TRINITY_DN2257_c0_g1;TRINITY_DN2430_c1_g1;TRINITY_DN2708_c0_g1;TRINITY_DN2879_c0_g1;TRINITY_DN3169_c3_g1;TRINITY_DN3154_c1_g1;TRINITY_DN3240_c0_g1;TRINITY_DN3535_c0_g1;TRINITY…
ATP-binding cassette (ABC) transporter complex	cellular_component	GO:0043190	86	TRINITY_DN2929_c0_g1;TRINITY_DN3627_c0_g1;TRINITY_DN11947_c0_g3;TRINITY_DN14005_c0_g4;TRINITY_DN14005_c0_g6;TRINITY_DN14005_c0_g12;TRINITY_DN14005_c0_g10;TRINITY_DN14225_c0_g7;TRINITY_DN14225_c0_g1;TRINITY_DN15645_c1_g7;TRINITY_DN16340_c0_g6;TRINITY_DN16340_c0_g10;TRINITY_DN16340_c0_g11;TRINITY_DN18528_c0_g4;TRINITY_DN18528_c0_g1;TRINITY_DN18528_c0_g2;TRINITY_DN18528_c0_g3;TRINITY_DN19378_c0_g7;T…
glucose transport	biological_process	GO:0015758	86	TRINITY_DN134_c1_g1;TRINITY_DN330_c0_g1;TRINITY_DN482_c1_g2;TRINITY_DN623_c3_g2;TRINITY_DN875_c0_g2;TRINITY_DN944_c0_g1;TRINITY_DN1582_c0_g1;TRINITY_DN1658_c1_g1;TRINITY_DN1758_c1_g1;TRINITY_DN1805_c2_g1;TRINITY_DN2163_c0_g1;TRINITY_DN2260_c0_g1;TRINITY_DN2265_c3_g1;TRINITY_DN2485_c0_g1;TRINITY_DN2552_c0_g1;TRINITY_DN2624_c0_g1;TRINITY_DN2753_c0_g1;TRINITY_DN2865_c1_g2;TRINITY_DN2865_c1_g1;TRINIT…
protein export from nucleus	biological_process	GO:0006611	86	TRINITY_DN134_c1_g1;TRINITY_DN195_c0_g1;TRINITY_DN297_c8_g1;TRINITY_DN330_c0_g1;TRINITY_DN367_c1_g1;TRINITY_DN391_c0_g1;TRINITY_DN854_c0_g2;TRINITY_DN898_c1_g1;TRINITY_DN898_c0_g1;TRINITY_DN802_c0_g1;TRINITY_DN1288_c11_g1;TRINITY_DN1239_c1_g1;TRINITY_DN1217_c0_g1;TRINITY_DN1478_c0_g1;TRINITY_DN1754_c3_g1;TRINITY_DN1742_c0_g1;TRINITY_DN1773_c0_g5;TRINITY_DN1773_c0_g1;TRINITY_DN1773_c0_g3;TRINITY_D…
NADH dehydrogenase (ubiquinone) activity	molecular_function	GO:0008137	85	TRINITY_DN3_c9_g2;TRINITY_DN112_c3_g1;TRINITY_DN199_c0_g1;TRINITY_DN444_c1_g1;TRINITY_DN468_c0_g1;TRINITY_DN819_c1_g2;TRINITY_DN819_c1_g1;TRINITY_DN1392_c1_g1;TRINITY_DN1510_c0_g1;TRINITY_DN2745_c2_g1;TRINITY_DN2702_c1_g1;TRINITY_DN2726_c0_g1;TRINITY_DN3539_c4_g1;TRINITY_DN3539_c1_g1;TRINITY_DN3506_c1_g1;TRINITY_DN3708_c0_g1;TRINITY_DN4903_c0_g1;TRINITY_DN5128_c3_g1;TRINITY_DN5283_c0_g1;TRINITY_D…
synapse assembly	biological_process	GO:0007416	85	TRINITY_DN231_c0_g1;TRINITY_DN481_c1_g4;TRINITY_DN514_c0_g4;TRINITY_DN508_c4_g1;TRINITY_DN769_c0_g1;TRINITY_DN957_c0_g1;TRINITY_DN1046_c0_g1;TRINITY_DN1777_c3_g5;TRINITY_DN1808_c4_g1;TRINITY_DN1901_c2_g2;TRINITY_DN2112_c2_g1;TRINITY_DN2275_c0_g1;TRINITY_DN2273_c1_g1;TRINITY_DN2624_c0_g1;TRINITY_DN2840_c4_g1;TRINITY_DN2840_c0_g1;TRINITY_DN3097_c0_g2;TRINITY_DN3357_c1_g2;TRINITY_DN4342_c2_g1;TRINIT…
positive regulation of epithelial cell proliferation	biological_process	GO:0050679	85	TRINITY_DN221_c0_g1;TRINITY_DN217_c0_g3;TRINITY_DN203_c0_g3;TRINITY_DN481_c1_g3;TRINITY_DN512_c0_g2;TRINITY_DN582_c1_g1;TRINITY_DN541_c2_g1;TRINITY_DN612_c0_g1;TRINITY_DN871_c1_g1;TRINITY_DN895_c0_g1;TRINITY_DN834_c0_g2;TRINITY_DN939_c0_g2;TRINITY_DN1016_c2_g1;TRINITY_DN1285_c3_g1;TRINITY_DN1204_c6_g1;TRINITY_DN1447_c5_g1;TRINITY_DN1473_c1_g2;TRINITY_DN1418_c3_g1;TRINITY_DN1482_c2_g1;TRINITY_DN15…
spinal cord development	biological_process	GO:0021510	85	TRINITY_DN62_c2_g1;TRINITY_DN62_c0_g1;TRINITY_DN101_c0_g1;TRINITY_DN200_c4_g1;TRINITY_DN510_c0_g1;TRINITY_DN510_c0_g2;TRINITY_DN545_c0_g1;TRINITY_DN840_c0_g1;TRINITY_DN828_c0_g1;TRINITY_DN802_c0_g1;TRINITY_DN919_c1_g1;TRINITY_DN944_c0_g1;TRINITY_DN1409_c0_g1;TRINITY_DN1870_c1_g1;TRINITY_DN1910_c0_g2;TRINITY_DN2077_c0_g1;TRINITY_DN2262_c1_g1;TRINITY_DN2961_c2_g1;TRINITY_DN3115_c0_g1;TRINITY_DN4208…
spleen development	biological_process	GO:0048536	85	TRINITY_DN13_c2_g2;TRINITY_DN13_c2_g1;TRINITY_DN153_c1_g1;TRINITY_DN217_c2_g1;TRINITY_DN396_c2_g2;TRINITY_DN405_c0_g2;TRINITY_DN552_c1_g2;TRINITY_DN626_c0_g1;TRINITY_DN691_c0_g1;TRINITY_DN983_c0_g6;TRINITY_DN1204_c1_g1;TRINITY_DN1360_c0_g1;TRINITY_DN1481_c0_g2;TRINITY_DN1512_c0_g1;TRINITY_DN1861_c2_g1;TRINITY_DN1885_c0_g1;TRINITY_DN1915_c0_g1;TRINITY_DN2045_c4_g1;TRINITY_DN2080_c4_g1;TRINITY_DN21…
glutathione transferase activity	molecular_function	GO:0004364	85	TRINITY_DN243_c0_g1;TRINITY_DN287_c4_g1;TRINITY_DN1450_c1_g1;TRINITY_DN1623_c1_g1;TRINITY_DN2098_c4_g1;TRINITY_DN2098_c1_g3;TRINITY_DN2098_c1_g2;TRINITY_DN2098_c1_g1;TRINITY_DN2181_c0_g1;TRINITY_DN2226_c9_g1;TRINITY_DN2245_c0_g1;TRINITY_DN2245_c0_g2;TRINITY_DN2314_c0_g1;TRINITY_DN3147_c0_g1;TRINITY_DN3147_c0_g3;TRINITY_DN3577_c0_g1;TRINITY_DN3577_c0_g2;TRINITY_DN4236_c1_g1;TRINITY_DN4236_c0_g1;TR…
glutamine metabolic process	biological_process	GO:0006541	85	TRINITY_DN156_c3_g1;TRINITY_DN258_c8_g1;TRINITY_DN302_c0_g1;TRINITY_DN481_c1_g4;TRINITY_DN660_c0_g1;TRINITY_DN717_c0_g2;TRINITY_DN840_c0_g1;TRINITY_DN1265_c0_g1;TRINITY_DN1265_c0_g2;TRINITY_DN1900_c0_g2;TRINITY_DN2049_c0_g1;TRINITY_DN2486_c1_g1;TRINITY_DN2757_c0_g1;TRINITY_DN4185_c4_g1;TRINITY_DN4293_c0_g1;TRINITY_DN4214_c1_g1;TRINITY_DN5774_c0_g1;TRINITY_DN6689_c0_g1;TRINITY_DN6689_c0_g2;TRINITY…
cellular response to interferon-gamma	biological_process	GO:0071346	85	TRINITY_DN173_c0_g1;TRINITY_DN173_c6_g1;TRINITY_DN217_c0_g3;TRINITY_DN770_c0_g1;TRINITY_DN901_c1_g1;TRINITY_DN1345_c2_g1;TRINITY_DN1468_c0_g1;TRINITY_DN1569_c1_g2;TRINITY_DN1647_c2_g1;TRINITY_DN1606_c0_g2;TRINITY_DN1692_c0_g1;TRINITY_DN1692_c0_g3;TRINITY_DN1920_c0_g4;TRINITY_DN1920_c0_g2;TRINITY_DN1920_c0_g3;TRINITY_DN2025_c0_g1;TRINITY_DN2116_c0_g1;TRINITY_DN2147_c0_g1;TRINITY_DN2368_c1_g1;TRINI…
telomere maintenance	biological_process	GO:0000723	85	TRINITY_DN14_c0_g1;TRINITY_DN382_c0_g1;TRINITY_DN494_c0_g2;TRINITY_DN503_c1_g2;TRINITY_DN546_c1_g1;TRINITY_DN695_c0_g1;TRINITY_DN720_c1_g1;TRINITY_DN712_c2_g1;TRINITY_DN889_c0_g1;TRINITY_DN987_c0_g1;TRINITY_DN1042_c0_g1;TRINITY_DN1172_c0_g1;TRINITY_DN1487_c0_g1;TRINITY_DN1775_c0_g1;TRINITY_DN1775_c0_g3;TRINITY_DN1743_c1_g3;TRINITY_DN1709_c0_g1;TRINITY_DN1861_c2_g1;TRINITY_DN1827_c4_g1;TRINITY_DN2…
cellular protein localization	biological_process	GO:0034613	85	TRINITY_DN205_c2_g1;TRINITY_DN217_c0_g3;TRINITY_DN387_c4_g1;TRINITY_DN315_c0_g2;TRINITY_DN726_c0_g1;TRINITY_DN1434_c0_g2;TRINITY_DN1508_c0_g1;TRINITY_DN1651_c0_g1;TRINITY_DN1691_c0_g1;TRINITY_DN1765_c0_g1;TRINITY_DN1862_c2_g1;TRINITY_DN2544_c0_g1;TRINITY_DN2655_c0_g1;TRINITY_DN2654_c1_g1;TRINITY_DN2651_c0_g1;TRINITY_DN2871_c0_g1;TRINITY_DN2809_c0_g6;TRINITY_DN3154_c1_g1;TRINITY_DN3573_c0_g1;TRINI…
negative regulation of protein ubiquitination	biological_process	GO:0031397	85	TRINITY_DN109_c1_g1;TRINITY_DN277_c0_g1;TRINITY_DN428_c3_g1;TRINITY_DN551_c1_g1;TRINITY_DN510_c0_g2;TRINITY_DN596_c3_g1;TRINITY_DN769_c0_g1;TRINITY_DN854_c0_g2;TRINITY_DN944_c1_g1;TRINITY_DN1098_c0_g1;TRINITY_DN1245_c0_g1;TRINITY_DN1217_c1_g1;TRINITY_DN1546_c0_g1;TRINITY_DN1650_c0_g1;TRINITY_DN1719_c1_g3;TRINITY_DN1828_c2_g2;TRINITY_DN2127_c1_g1;TRINITY_DN2612_c0_g1;TRINITY_DN2612_c0_g2;TRINITY_D…
arachidonic acid metabolic process	biological_process	GO:0019369	85	TRINITY_DN452_c1_g1;TRINITY_DN663_c2_g1;TRINITY_DN663_c6_g1;TRINITY_DN636_c1_g2;TRINITY_DN636_c1_g1;TRINITY_DN734_c0_g1;TRINITY_DN935_c2_g1;TRINITY_DN1215_c4_g1;TRINITY_DN1215_c1_g1;TRINITY_DN1215_c0_g1;TRINITY_DN1529_c0_g1;TRINITY_DN1561_c0_g1;TRINITY_DN1737_c2_g1;TRINITY_DN1927_c0_g1;TRINITY_DN2057_c1_g1;TRINITY_DN2062_c1_g1;TRINITY_DN2150_c0_g1;TRINITY_DN3346_c0_g2;TRINITY_DN3385_c2_g2;TRINITY…
potassium ion transport	biological_process	GO:0006813	85	TRINITY_DN101_c1_g1;TRINITY_DN101_c0_g1;TRINITY_DN234_c1_g1;TRINITY_DN234_c0_g2;TRINITY_DN318_c0_g1;TRINITY_DN478_c4_g1;TRINITY_DN478_c4_g2;TRINITY_DN867_c0_g1;TRINITY_DN914_c1_g1;TRINITY_DN1384_c0_g1;TRINITY_DN1471_c0_g1;TRINITY_DN1590_c1_g1;TRINITY_DN1575_c1_g1;TRINITY_DN1597_c1_g1;TRINITY_DN1683_c0_g1;TRINITY_DN1665_c0_g2;TRINITY_DN1619_c0_g1;TRINITY_DN1852_c2_g1;TRINITY_DN2666_c1_g1;TRINITY_D…
fertilization	biological_process	GO:0009566	84	TRINITY_DN103_c1_g1;TRINITY_DN312_c2_g1;TRINITY_DN378_c2_g1;TRINITY_DN458_c2_g1;TRINITY_DN485_c0_g1;TRINITY_DN571_c0_g1;TRINITY_DN1264_c2_g1;TRINITY_DN1348_c1_g1;TRINITY_DN1352_c0_g2;TRINITY_DN1652_c0_g2;TRINITY_DN2158_c1_g1;TRINITY_DN2180_c5_g1;TRINITY_DN2535_c0_g2;TRINITY_DN2654_c0_g1;TRINITY_DN3030_c0_g1;TRINITY_DN3080_c5_g1;TRINITY_DN3036_c1_g1;TRINITY_DN3619_c0_g2;TRINITY_DN4453_c0_g1;TRINIT…
collagen binding	molecular_function	GO:0005518	84	TRINITY_DN11_c1_g1;TRINITY_DN109_c1_g1;TRINITY_DN291_c0_g1;TRINITY_DN545_c0_g1;TRINITY_DN563_c0_g1;TRINITY_DN714_c1_g1;TRINITY_DN1239_c3_g2;TRINITY_DN1539_c4_g1;TRINITY_DN1868_c1_g1;TRINITY_DN1814_c0_g1;TRINITY_DN1940_c0_g1;TRINITY_DN1961_c0_g1;TRINITY_DN2018_c17_g1;TRINITY_DN2064_c0_g1;TRINITY_DN2103_c0_g1;TRINITY_DN2299_c0_g1;TRINITY_DN3276_c0_g1;TRINITY_DN3980_c0_g1;TRINITY_DN4478_c0_g1;TRINIT…
sensory perception of pain	biological_process	GO:0019233	84	TRINITY_DN204_c1_g1;TRINITY_DN481_c1_g4;TRINITY_DN455_c0_g1;TRINITY_DN734_c0_g1;TRINITY_DN769_c0_g1;TRINITY_DN877_c9_g1;TRINITY_DN983_c0_g3;TRINITY_DN1685_c0_g1;TRINITY_DN1737_c2_g1;TRINITY_DN1799_c0_g1;TRINITY_DN1921_c0_g3;TRINITY_DN2273_c1_g1;TRINITY_DN2514_c0_g1;TRINITY_DN2675_c0_g1;TRINITY_DN3228_c0_g2;TRINITY_DN3357_c1_g2;TRINITY_DN3460_c0_g1;TRINITY_DN4168_c0_g1;TRINITY_DN4168_c0_g2;TRINITY…
peptidyl-tyrosine autophosphorylation	biological_process	GO:0038083	84	TRINITY_DN164_c1_g1;TRINITY_DN387_c4_g1;TRINITY_DN546_c0_g1;TRINITY_DN572_c1_g1;TRINITY_DN742_c1_g1;TRINITY_DN1435_c0_g1;TRINITY_DN1472_c1_g1;TRINITY_DN1704_c0_g1;TRINITY_DN2045_c4_g1;TRINITY_DN2341_c1_g1;TRINITY_DN2366_c2_g1;TRINITY_DN3273_c0_g1;TRINITY_DN3334_c0_g1;TRINITY_DN3552_c0_g1;TRINITY_DN3611_c1_g2;TRINITY_DN3611_c1_g1;TRINITY_DN3611_c0_g1;TRINITY_DN3797_c0_g1;TRINITY_DN3797_c0_g2;TRINI…
lipid homeostasis	biological_process	GO:0055088	84	TRINITY_DN21_c1_g1;TRINITY_DN132_c0_g2;TRINITY_DN360_c0_g1;TRINITY_DN322_c7_g2;TRINITY_DN436_c0_g1;TRINITY_DN847_c0_g1;TRINITY_DN847_c0_g2;TRINITY_DN1254_c0_g3;TRINITY_DN1390_c1_g1;TRINITY_DN1453_c1_g1;TRINITY_DN1522_c0_g1;TRINITY_DN1522_c0_g2;TRINITY_DN1589_c1_g1;TRINITY_DN1552_c1_g1;TRINITY_DN1613_c0_g1;TRINITY_DN1791_c0_g1;TRINITY_DN1866_c0_g1;TRINITY_DN2870_c0_g1;TRINITY_DN3090_c0_g1;TRINITY_…
negative regulation of neuron projection development	biological_process	GO:0010977	84	TRINITY_DN98_c1_g1;TRINITY_DN49_c2_g1;TRINITY_DN125_c2_g1;TRINITY_DN114_c0_g1;TRINITY_DN307_c2_g1;TRINITY_DN566_c0_g1;TRINITY_DN981_c0_g2;TRINITY_DN981_c0_g3;TRINITY_DN956_c1_g1;TRINITY_DN1141_c0_g1;TRINITY_DN1311_c1_g1;TRINITY_DN1401_c0_g1;TRINITY_DN1647_c3_g1;TRINITY_DN2111_c0_g1;TRINITY_DN2396_c14_g1;TRINITY_DN2326_c1_g1;TRINITY_DN2545_c1_g1;TRINITY_DN2946_c6_g1;TRINITY_DN3357_c0_g2;TRINITY_DN…
thymus development	biological_process	GO:0048538	84	TRINITY_DN153_c1_g1;TRINITY_DN110_c4_g1;TRINITY_DN332_c4_g2;TRINITY_DN471_c0_g1;TRINITY_DN494_c2_g2;TRINITY_DN546_c1_g1;TRINITY_DN561_c0_g2;TRINITY_DN691_c0_g1;TRINITY_DN619_c0_g1;TRINITY_DN1216_c0_g1;TRINITY_DN1216_c0_g2;TRINITY_DN1204_c1_g1;TRINITY_DN1308_c0_g2;TRINITY_DN1481_c0_g2;TRINITY_DN1506_c4_g1;TRINITY_DN1611_c1_g1;TRINITY_DN1697_c0_g2;TRINITY_DN1861_c2_g1;TRINITY_DN2045_c4_g1;TRINITY_D…
histone acetyltransferase activity	molecular_function	GO:0004402	84	TRINITY_DN165_c1_g3;TRINITY_DN165_c1_g2;TRINITY_DN110_c1_g3;TRINITY_DN110_c1_g2;TRINITY_DN110_c1_g1;TRINITY_DN233_c0_g1;TRINITY_DN610_c2_g1;TRINITY_DN680_c0_g1;TRINITY_DN740_c0_g1;TRINITY_DN958_c0_g2;TRINITY_DN958_c0_g3;TRINITY_DN1164_c1_g1;TRINITY_DN1195_c0_g1;TRINITY_DN1211_c0_g1;TRINITY_DN1200_c2_g1;TRINITY_DN1311_c2_g1;TRINITY_DN1939_c0_g1;TRINITY_DN2354_c0_g1;TRINITY_DN2430_c1_g1;TRINITY_DN2…
base-excision repair	biological_process	GO:0006284	84	TRINITY_DN38_c1_g1;TRINITY_DN402_c1_g1;TRINITY_DN782_c0_g1;TRINITY_DN1253_c0_g1;TRINITY_DN1345_c11_g1;TRINITY_DN1709_c0_g1;TRINITY_DN1828_c0_g1;TRINITY_DN2168_c1_g1;TRINITY_DN2181_c1_g1;TRINITY_DN2286_c0_g1;TRINITY_DN2251_c1_g3;TRINITY_DN2251_c1_g2;TRINITY_DN2471_c6_g1;TRINITY_DN2920_c0_g1;TRINITY_DN3091_c3_g1;TRINITY_DN3183_c0_g1;TRINITY_DN3154_c1_g1;TRINITY_DN3268_c0_g1;TRINITY_DN3382_c0_g1;TRI…
cytokinesis	biological_process	GO:0000910	83	TRINITY_DN23_c2_g1;TRINITY_DN350_c0_g1;TRINITY_DN416_c0_g1;TRINITY_DN649_c4_g1;TRINITY_DN671_c0_g1;TRINITY_DN799_c0_g1;TRINITY_DN971_c1_g2;TRINITY_DN971_c1_g1;TRINITY_DN1027_c0_g1;TRINITY_DN1058_c6_g1;TRINITY_DN1198_c0_g1;TRINITY_DN1167_c1_g1;TRINITY_DN1342_c1_g1;TRINITY_DN1759_c0_g1;TRINITY_DN2089_c0_g1;TRINITY_DN2158_c1_g1;TRINITY_DN2137_c0_g1;TRINITY_DN2182_c2_g1;TRINITY_DN2253_c0_g1;TRINITY_D…
lysosome organization	biological_process	GO:0007040	83	TRINITY_DN91_c0_g1;TRINITY_DN346_c1_g1;TRINITY_DN308_c0_g1;TRINITY_DN372_c2_g1;TRINITY_DN534_c0_g1;TRINITY_DN623_c1_g1;TRINITY_DN602_c1_g1;TRINITY_DN642_c0_g1;TRINITY_DN708_c0_g1;TRINITY_DN739_c0_g1;TRINITY_DN721_c0_g2;TRINITY_DN951_c0_g1;TRINITY_DN928_c0_g1;TRINITY_DN928_c0_g3;TRINITY_DN1085_c1_g1;TRINITY_DN1123_c0_g3;TRINITY_DN1182_c3_g1;TRINITY_DN1740_c0_g1;TRINITY_DN1712_c0_g1;TRINITY_DN1759_…
DNA-directed RNA polymerase activity	molecular_function	GO:0003899	83	TRINITY_DN55_c3_g2;TRINITY_DN242_c0_g1;TRINITY_DN307_c1_g1;TRINITY_DN688_c1_g1;TRINITY_DN890_c0_g1;TRINITY_DN890_c0_g3;TRINITY_DN1014_c0_g1;TRINITY_DN1156_c2_g1;TRINITY_DN1217_c0_g1;TRINITY_DN1793_c1_g1;TRINITY_DN1912_c1_g2;TRINITY_DN2195_c1_g1;TRINITY_DN2240_c1_g1;TRINITY_DN2258_c1_g1;TRINITY_DN3061_c0_g1;TRINITY_DN3126_c1_g1;TRINITY_DN3244_c0_g2;TRINITY_DN3472_c0_g1;TRINITY_DN4735_c2_g1;TRINITY…
extracellular matrix disassembly	biological_process	GO:0022617	83	TRINITY_DN172_c1_g2;TRINITY_DN221_c0_g1;TRINITY_DN471_c0_g1;TRINITY_DN634_c0_g1;TRINITY_DN705_c0_g1;TRINITY_DN921_c0_g2;TRINITY_DN1045_c0_g1;TRINITY_DN1016_c2_g1;TRINITY_DN1030_c0_g1;TRINITY_DN1062_c0_g1;TRINITY_DN1239_c3_g2;TRINITY_DN1413_c0_g1;TRINITY_DN1539_c4_g1;TRINITY_DN1706_c0_g1;TRINITY_DN1706_c0_g2;TRINITY_DN1857_c1_g1;TRINITY_DN1971_c0_g1;TRINITY_DN1925_c1_g1;TRINITY_DN2382_c0_g2;TRINIT…
embryonic skeletal system morphogenesis	biological_process	GO:0048704	83	TRINITY_DN203_c1_g1;TRINITY_DN481_c1_g3;TRINITY_DN459_c2_g1;TRINITY_DN561_c0_g2;TRINITY_DN572_c5_g1;TRINITY_DN877_c9_g1;TRINITY_DN919_c1_g1;TRINITY_DN983_c0_g5;TRINITY_DN983_c0_g6;TRINITY_DN983_c0_g1;TRINITY_DN983_c0_g2;TRINITY_DN983_c0_g3;TRINITY_DN1045_c0_g1;TRINITY_DN1541_c0_g2;TRINITY_DN1828_c4_g2;TRINITY_DN1862_c0_g1;TRINITY_DN2166_c0_g1;TRINITY_DN2226_c2_g1;TRINITY_DN2691_c0_g1;TRINITY_DN26…
mRNA 3'-UTR binding	molecular_function	GO:0003730	83	TRINITY_DN85_c2_g1;TRINITY_DN42_c0_g3;TRINITY_DN396_c2_g2;TRINITY_DN354_c6_g1;TRINITY_DN320_c0_g1;TRINITY_DN404_c0_g1;TRINITY_DN450_c0_g1;TRINITY_DN450_c0_g2;TRINITY_DN450_c0_g3;TRINITY_DN663_c1_g1;TRINITY_DN1264_c2_g1;TRINITY_DN1332_c0_g1;TRINITY_DN1332_c0_g2;TRINITY_DN1308_c0_g2;TRINITY_DN1328_c3_g1;TRINITY_DN1328_c6_g1;TRINITY_DN1379_c1_g1;TRINITY_DN1445_c0_g1;TRINITY_DN1575_c0_g1;TRINITY_DN16…
nuclear-transcribed mRNA catabolic process, deadenylation-dependent decay	biological_process	GO:0000288	83	TRINITY_DN168_c0_g1;TRINITY_DN395_c0_g1;TRINITY_DN301_c1_g1;TRINITY_DN392_c0_g1;TRINITY_DN481_c1_g2;TRINITY_DN637_c0_g1;TRINITY_DN712_c1_g2;TRINITY_DN936_c1_g1;TRINITY_DN1116_c2_g1;TRINITY_DN1305_c0_g1;TRINITY_DN1875_c0_g1;TRINITY_DN2492_c1_g1;TRINITY_DN2938_c0_g4;TRINITY_DN2957_c0_g1;TRINITY_DN3049_c0_g1;TRINITY_DN3053_c5_g1;TRINITY_DN3008_c0_g1;TRINITY_DN3519_c0_g1;TRINITY_DN4020_c0_g2;TRINITY_…
skeletal system morphogenesis	biological_process	GO:0048705	83	TRINITY_DN86_c3_g1;TRINITY_DN86_c3_g3;TRINITY_DN176_c3_g1;TRINITY_DN327_c1_g1;TRINITY_DN494_c2_g2;TRINITY_DN576_c0_g3;TRINITY_DN760_c3_g1;TRINITY_DN793_c0_g1;TRINITY_DN877_c9_g1;TRINITY_DN983_c0_g6;TRINITY_DN928_c0_g1;TRINITY_DN928_c0_g3;TRINITY_DN1084_c1_g1;TRINITY_DN1372_c0_g1;TRINITY_DN1447_c0_g1;TRINITY_DN1447_c0_g2;TRINITY_DN1420_c0_g2;TRINITY_DN1590_c0_g3;TRINITY_DN1506_c4_g1;TRINITY_DN1573…
olfactory receptor activity	molecular_function	GO:0004984	83	TRINITY_DN2714_c1_g1;TRINITY_DN5351_c0_g1;TRINITY_DN5351_c0_g3;TRINITY_DN5324_c1_g1;TRINITY_DN6480_c0_g2;TRINITY_DN6764_c1_g1;TRINITY_DN8418_c1_g1;TRINITY_DN10468_c0_g1;TRINITY_DN11544_c3_g2;TRINITY_DN15452_c0_g1;TRINITY_DN16485_c1_g2;TRINITY_DN18134_c2_g1;TRINITY_DN18678_c0_g1;TRINITY_DN18678_c0_g2;TRINITY_DN18766_c3_g2;TRINITY_DN19486_c0_g4;TRINITY_DN19486_c0_g6;TRINITY_DN19486_c0_g7;TRINITY_DN…
[truncated: 16,537 more rows]
